# Supplementary material for: Chiral cis-iron(ii) complexes with metal- and ligand-centered chirality for highly regio- and enantioselective alkylation of N-heteroaromatics
Source: PubMed Central journal article supplement — Chem Sci. 2019 Nov 25;11(3):684–93. doi: 10.1039/c9sc04858h (PMC8145867; doi:10.1039/c9sc04858h), 2019-11-25
Supplement: SC-011-C9SC04858H-s001.pdf [file SC-011-C9SC04858H-s001.pdf]

## Electronic Supplementary Information

### Chiral *cis*-iron(II) complexes with metal- and ligand-centered chirality for highly regio- and enantioselective alkylation of N-heteroaromatics

Jinhu Wei,<sup>a</sup> Bei Cao,<sup>a</sup> Chun-Wai Tse,<sup>a</sup> Xiao-Yong Chang,<sup>b</sup> Cong-Ying Zhou<sup>a</sup> and Chi-Ming Che<sup>\*abc</sup>

<sup>a</sup> State Key Laboratory of Synthetic Chemistry and Department of Chemistry, The University of Hong Kong, Pokfulam Road, Hong Kong SAR, China. E-mail: [cmche@hku.hk](mailto:cmche@hku.hk)

<sup>b</sup> Department of Chemistry, Southern University of Science and Technology of China, Shenzhen, Guangdong 518055, China

<sup>c</sup> HKU Shenzhen Institute of Research & Innovation, Shenzhen 518055, China

### Table of Contents

|                                            |      |
|--------------------------------------------|------|
| Experimental section .....                 | S2   |
| General information .....                  | S2   |
| Synthesis of iron complexes .....          | S2   |
| Computational details .....                | S25  |
| Table S1 .....                             | S6   |
| Table S2 .....                             | S7   |
| Table S3 .....                             | S7   |
| Fig. S1 .....                              | S8   |
| Fig. S2 .....                              | S9   |
| Fig. S3 .....                              | S10  |
| Fig. S4 .....                              | S11  |
| Fig. S5 .....                              | S11  |
| Fig. S6 .....                              | S12  |
| Characterization data of products .....    | S13  |
| References .....                           | S26  |
| NMR spectra of compounds .....             | S27  |
| Chiral HPLC chromatographic analysis ..... | S88  |
| Coordinates .....                          | S140 |

## Experimental section

### General information

Reagents were obtained commercially and used without further purification unless indicated otherwise. Molecular sieves were dried at 450 °C for 5 h prior to use. All solvents used in the reaction were dried and freshly distilled. Flash chromatography was performed using Merck silica gel 60 and a gradient solvent system (EtOAc/*n*-hexane as eluent). Preparative thin layer chromatography was performed on pre-coated silica gel 60 F254 plates. <sup>1</sup>H and <sup>13</sup>C NMR spectra were recorded on either a Bruker DPX-400 spectrometer. Chemical shifts (δ ppm) were determined with tetramethylsilane (TMS) as internal reference. Mass spectra were determined on a Finnigan MAT 95 mass spectrometer. High performance liquid chromatography was carried out using Agilent 1100 equipped with a variable wavelength detector on chiral stationary columns from DAICEL. Infrared spectra were prepared as KBr pellets and recorded on a Bio-Rad FTS-185 FT-IR spectrometer. Fe(OTf)<sub>2</sub>·(CH<sub>3</sub>CN)<sub>2</sub><sup>1</sup> was prepared by the reported method. Reactions were carried out under nitrogen atmosphere.

### Synthesis of iron complexes

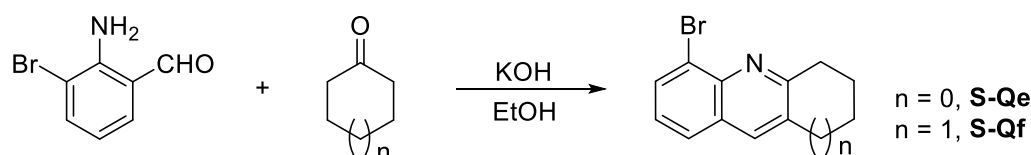

**General procedure A:**<sup>2,3</sup> A mixture of 2-amino-3-bromobenzaldehyde (5 g, 25 mmol), ketone (1.2 equiv) and KOH (1.3 equiv) in ethanol (150 mL) was refluxed under argon for 20 h. Then the mixture was cooled down to room temperature, quenched with H<sub>2</sub>O (80 mL), and extracted with EA (4 × 50 mL); the organic phase was washed with brine (3 × 50 mL), dried with MgSO<sub>4</sub>, filtered and concentrated under reduced pressure. The crude residue was purified by silica gel flash chromatography (EA/hexane = 1:20 v/v) to afford the product **S-Q**.

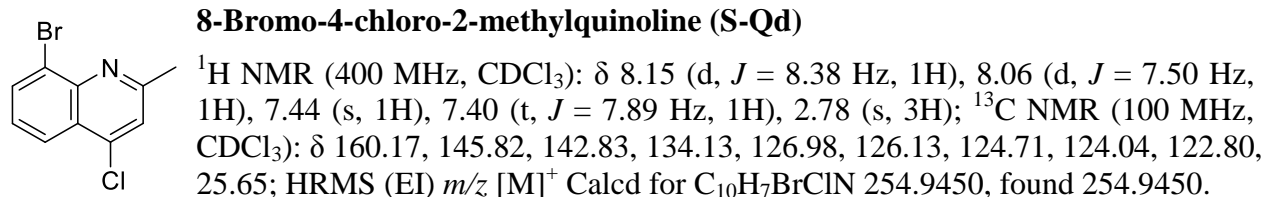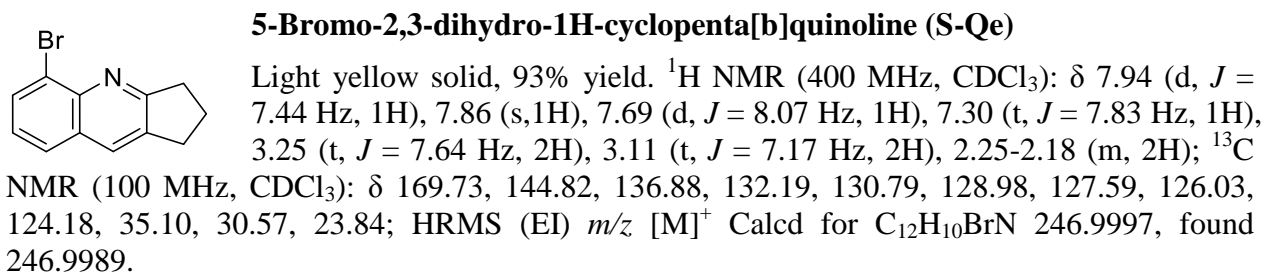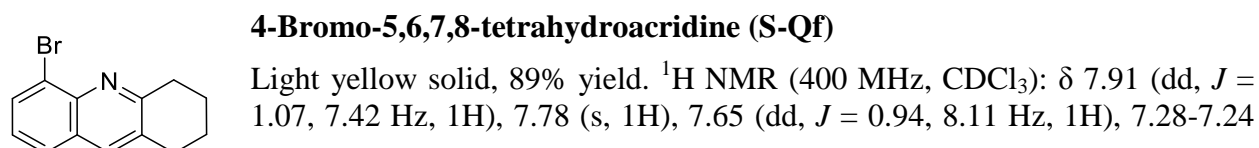

(m, 1H), 3.21 (t,  $J = 6.47$  Hz, 2H), 2.99 (t,  $J = 6.09$  Hz, 2H), 2.02-1.96 (m, 2H), 1.93-1.88 (m, 2H);  $^{13}\text{C}$  NMR (100 MHz,  $\text{CDCl}_3$ ):  $\delta$  161.05, 143.75, 138.23, 135.41, 132.15, 128.56, 127.04, 125.98, 124.03, 33.98, 29.18, 23.23, 22.92; HRMS (EI)  $m/z$   $[\text{M}]^+$  Calcd for  $\text{C}_{13}\text{H}_{12}\text{BrN}$  261.0153, found 261.0151.

**General procedure B:**<sup>4</sup> A mixture of (*R,R*)-1,2-diaminocyclohexane (17.5 mmol, 2 g),  $\text{Pd}_2(\text{dba})_3$  (5 mol%), *rac*-BINAP (10 mol%), 8-bromo-quinoline(**S-Q**, 2.1 equiv) and sodium *t*-butoxide (3 equiv) in dry toluene (200 mL) was stirred at 90 °C under argon atmosphere for 24-30 h. After cooled to room temperature, the reaction mixture was filtered through a plug of silica and concentrated under reduced pressure. The crude residue was purified by flash chromatography on silica gel (EA/hexane = 1:10 v/v) to afford the corresponding product in high yield.

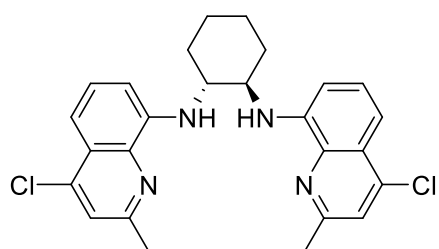

**(1*R*,2*R*)-*N*1,*N*2-Bis(4-chloro-2-methylquinolin-8-yl)cyclohexane-1,2-diamine (2d- $\text{H}_2$ )**

Yellow solid, 93% yield.  $^1\text{H}$  NMR (400 MHz,  $\text{CDCl}_3$ ):  $\delta$  7.38 (t,  $J = 7.94$  Hz, 2H), 7.27 (d,  $J = 8.44$  Hz, 2H), 7.19 (s, 2H), 6.87 (d,  $J = 7.64$  Hz, 2H), 6.38 (br, 2H), 3.67 (br, 2H), 2.43 (s, 6H), 2.41-2.37 (m, 2H), 1.90 (br, 2H), 1.59-1.55 (m, 4H);  $^{13}\text{C}$  NMR (100 MHz,  $\text{CDCl}_3$ ):  $\delta$  154.89, 144.57, 142.15, 138.46, 127.64, 125.04, 122.00, 109.76, 106.18, 57.64, 32.30, 24.87, 24.69; HRMS (ESI)  $m/z$   $[\text{M}+\text{H}]^+$  Calcd for  $\text{C}_{26}\text{H}_{27}\text{Cl}_2\text{N}_4$  465.1535, found 465.1531.

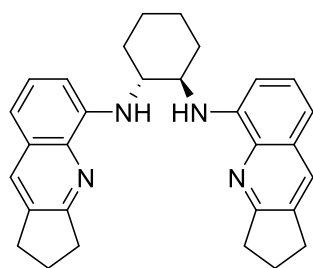

**(1*R*,2*R*)-*N*1,*N*2-Bis(2,3-dihydro-1H-cyclopenta[b]quinolin-5-yl)cyclohexane-1,2-diamine (2e- $\text{H}_2$ )**

Yellow solid, 91% yield.  $^1\text{H}$  NMR (400 MHz,  $\text{CDCl}_3$ ):  $\delta$  7.68 (s, 2H), 7.28 (t,  $J = 7.88$  Hz, 2H), 6.91 (dd,  $J = 0.78, 8.10$  Hz, 2H), 6.77 (d,  $J = 7.60$  Hz, 2H), 6.32 (d,  $J = 5.89$  Hz, 2H), 3.71 (b, 2H), 2.97-2.93 (m, 6H), 2.91-2.85 (m, 2H), 2.39 (b, 2H), 2.09-2.04 (m, 4H), 1.84 (b, 2H), 1.55-1.53 (m, 4H);  $^{13}\text{C}$  NMR (100 MHz,  $\text{CDCl}_3$ ):  $\delta$  164.34, 144.42, 137.64, 135.60, 130.19, 127.66, 126.50, 113.82, 104.81, 56.49, 34.37, 31.68, 30.56, 24.41, 23.85; HRMS (ESI)  $m/z$   $[\text{M}+\text{H}]^+$  Calcd for  $\text{C}_{30}\text{H}_{33}\text{N}_4$  449.2705, found 449.2703.

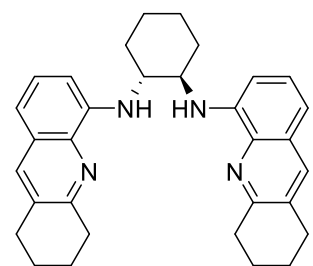

**(1*R*,2*R*)-*N*1,*N*2-Bis(5,6,7,8-tetrahydroacridin-4-yl)cyclohexane-1,2-diamine (2f- $\text{H}_2$ )**

Yellow solid, 92% yield.  $^1\text{H}$  NMR (400 MHz,  $\text{CDCl}_3$ ):  $\delta$  7.59 (s, 2H), 7.29 (t,  $J = 7.96$  Hz, 2H), 6.90 (d,  $J = 8.15$  Hz, 2H), 6.76 (d,  $J = 7.61$  Hz, 2H), 6.37 (d,  $J = 5.31$  Hz, 2H), 3.70 (b, 2H), 2.91-2.84 (m, 6H), 2.74-2.68 (m, 2H), 2.40 (b, 2H), 1.89-1.78 (m, 10H), 1.58 (b, 4H);  $^{13}\text{C}$  NMR (100 MHz,  $\text{CDCl}_3$ ):  $\delta$  155.63, 144.25, 136.92, 134.69, 130.80, 127.47, 126.66, 113.12, 104.28, 56.90, 33.28, 31.94, 29.23, 24.45, 23.44, 23.20; HRMS (ESI)  $m/z$   $[\text{M}+\text{H}]^+$  Calcd for  $\text{C}_{32}\text{H}_{37}\text{N}_4$  477.3018, found 477.3018.

**General procedure C:**<sup>4</sup>  $\text{CF}_3\text{COOH}$  (1 mL) was slowly added to a solution of the starting material (**L2'**, 4 g) and  $(\text{HCHO})_n$  (37 wt.% in  $\text{H}_2\text{O}$ , 20 mL) in  $\text{CH}_3\text{CN}$  (100 mL) at room temperature. After the mixture was stirred for 4 h,  $\text{NaB}(\text{CN})\text{H}_3$  (6 equiv) was added slowly at ice bath temperature. The reaction mixture was stirred overnight at rt. Then the reaction was quenched with 0.5 N  $\text{NaOH}$  aq to  $\text{pH} \approx 10$ , and extracted with  $\text{Et}_2\text{O}$  ( $2 \times 150$  mL). The organic phase was

washed with 0.5 N NaOH aq (4 × 50 mL) and brine, dried with MgSO<sub>4</sub>, filtered and concentrated under reduced pressure. The crude residue was purified by silica gel flash chromatography (EA/hexane = 1:10 to 1:5 v/v) to afford the product as a yellow solid.

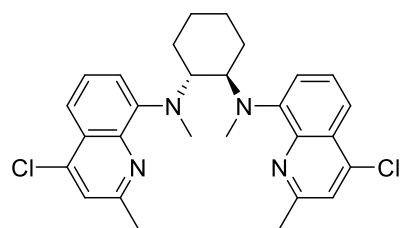

**(1R,2R)-N1,N2-Bis(4-chloro-2-methylquinolin-8-yl)-N1,N2-dimethylcyclohexane-1,2-diamine (2d)**

Yellow solid, 90% yield. <sup>1</sup>H NMR (400 MHz, CDCl<sub>3</sub>): δ 7.63 (d, *J* = 8.16 Hz, 2H), 7.41 (t, *J* = 7.95 Hz, 2H), 7.35 (s, 2H), 6.71 (d, *J* = 2H), 4.72-4.68 (m, 2H), 2.71 (s, 6H), 2.53-2.51 (m, 2H), 2.48 (s, 6H), 1.90-1.88 (m, 2H), 1.71-1.69 (m, 2H), 1.45-1.41 (m, 2H); <sup>13</sup>C NMR (100 MHz, CDCl<sub>3</sub>): δ 154.24, 149.19, 142.53, 142.33, 126.93, 126.21, 121.46, 116.32, 113.65, 63.83, 33.98, 30.78, 26.06, 25.33; HRMS (ESI) *m/z* [M+H]<sup>+</sup> Calcd for C<sub>28</sub>H<sub>31</sub>Cl<sub>2</sub>N<sub>4</sub> 493.1926, found 493.1923.

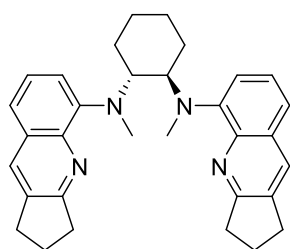

**(1R,2R)-N1,N2-Bis(2,3-dihydro-1H-cyclopenta[b]quinolin-5-yl)-N1,N2-dimethylcyclohexane-1,2-diamine (2e)**

Yellow solid, 87% yield. <sup>1</sup>H NMR (400 MHz, CDCl<sub>3</sub>): δ 7.81 (s, 2H), 7.30 (t, *J* = 7.81 Hz, 2H), 7.17 (d, *J* = 7.87 Hz, 2H), 6.74 (d, *J* = 7.14 Hz, 2H), 4.75-4.70 (m, 2H), 3.14 (t, *J* = 7.60 Hz, 4H), 3.08 (t, *J* = 7.37 Hz, 4H), 2.59 (s, 6H), 2.41-2.37 (m, 2H), 2.27-2.16 (m, 4H), 1.83-1.81 (m, 2H), 1.67-1.64 (m, 2H), 1.38-1.33 (m, 2H); <sup>13</sup>C NMR (100 MHz, CDCl<sub>3</sub>): δ 163.94, 149.45, 141.61, 134.57, 130.67, 128.78, 125.63, 118.07, 115.34, 63.63, 34.75, 33.90, 30.62, 30.41, 26.18, 23.81; HRMS (ESI) *m/z* [M+H]<sup>+</sup> Calcd for C<sub>32</sub>H<sub>37</sub>N<sub>4</sub> 477.3018, found 477.3018.

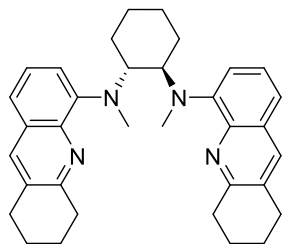

**(1R,2R)-N1,N2-Dimethyl-N1,N2-bis(5,6,7,8-tetrahydroacridin-4-yl)cyclohexane-1,2-diamine (2f)**

Yellow solid, 90% yield. <sup>1</sup>H NMR (400 MHz, CDCl<sub>3</sub>): δ 7.71 (s, 2H), 7.26 (t, *J* = 8.55 Hz, 2H), 7.11 (d, *J* = 7.92 Hz, 2H), 6.60 (d, *J* = 7.64 Hz, 2H), 4.84-4.82 (m, 2H), 3.13-3.09 (m, 4H), 2.95 (t, *J* = 6.36 Hz, 4H), 2.52 (s, 6H), 2.45-2.42 (m, 2H), 2.02-1.98 (m, 4H), 1.95-1.86 (m, 4H), 1.84-1.82 (m, 2H), 1.65-1.60 (m, 2H), 1.41-1.36 (m, 2H); <sup>13</sup>C NMR (100 MHz, CDCl<sub>3</sub>): δ 155.02, 148.81, 140.60, 135.18, 130.00, 128.74, 125.83, 117.02, 114.41, 63.45, 33.87, 33.75, 30.73, 29.20, 26.14, 23.67, 23.37; HRMS (ESI) *m/z* [M+H]<sup>+</sup> Calcd for C<sub>34</sub>H<sub>41</sub>N<sub>4</sub> 505.3331, found 505.3328.

**General Procedure D:**<sup>4</sup> A mixture of ligand (L2, 1 g) and Fe(OTf)<sub>2</sub>·(CH<sub>3</sub>CN)<sub>2</sub> (0.95 equiv) in dry THF (8 mL) was stirred under argon atmosphere at room temperature for 6 h. The reaction mixture was cooled down with liquid nitrogen for 30 min; then the liquid nitrogen bath was removed and THF was pumped off under reduced pressure carefully. The crude residue was ground into powder and washed with dry Et<sub>2</sub>O (3 × 10 mL). The pure product was collected and dried under reduced pressure.



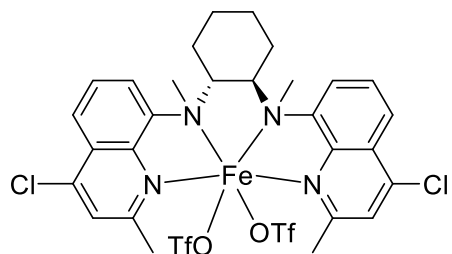

**(1R,2R)-N1,N2-Bis(4-chloro-2-methylquinolin-8-yl)-N1,N2-dimethylcyclohexane-1,2-diamine iron(II) bis(triflate) (1d)**

Voluminous orange powder, 95% yield. MS (ESI)  $m/z$  [M-2OTf]<sup>2+</sup> 274.1; Elemental analysis for [C<sub>30</sub>H<sub>30</sub>Cl<sub>2</sub>F<sub>6</sub>FeN<sub>4</sub>O<sub>6</sub>S<sub>2</sub>•H<sub>2</sub>O] Calcd for C 41.63, H 3.73, N 6.47, found C 41.69, H 3.78, N 6.43.

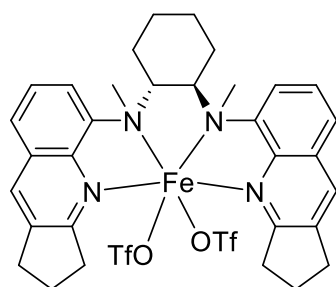

**(1R,2R)-N1,N2-Bis(2,3-dihydro-1H-cyclopenta[b]quinolin-5-yl)-N1,N2-dimethylcyclohexane-1,2-diamine iron(II) bis(triflate) (1e)**

Voluminous orange powder, 95% yield. IR (KBr):  $\nu_{max}$  3412, 2947, 2868, 1496, 1473, 1409, 1249, 1163, 1029, 769, 638, 574, 516 cm<sup>-1</sup>; MS (ESI)  $m/z$  [M-2OTf]<sup>2+</sup> 261.1; Elemental analysis for [C<sub>34</sub>H<sub>36</sub>F<sub>6</sub>FeN<sub>4</sub>O<sub>6</sub>S<sub>2</sub>•H<sub>2</sub>O] Calcd for C 48.12, H 4.51, N 6.60, found C 48.05, H 4.61, N 6.34.

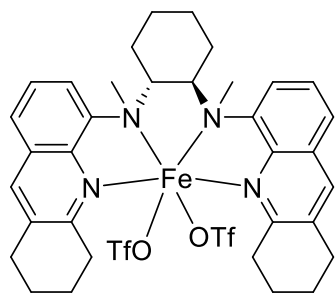

**(1R,2R)-N1,N2-Dimethyl-N1,N2-bis(5,6,7,8-tetrahydroacridin-4-yl)cyclohexane-1,2-diamine (1f)**

Voluminous orange powder, 92% yield. IR (KBr):  $\nu_{max}$  3431, 2943, 2868, 1490, 1465, 1419, 1251, 1161, 1029, 767, 636, 574, 516 cm<sup>-1</sup>; MS (ESI)  $m/z$  [M-2OTf]<sup>2+</sup> 280.2; Elemental analysis for C<sub>36</sub>H<sub>40</sub>F<sub>6</sub>FeN<sub>4</sub>O<sub>6</sub>S<sub>2</sub>•H<sub>2</sub>O Calcd for C 49.32, H 4.83, N 6.39, found C 48.97, H 4.93, N 6.03.

### General procedure for iron(II) complexes catalyzed alkylation of N-heteroaromatics with $\alpha,\beta$ -unsaturated 2-acyl imidazoles

To an oven-dried Schlenk flask equipped with a rubber seal was added N-heteroaromatics (0.45 mmol),  $\alpha,\beta$ -unsaturated 2-acyl imidazoles **4** (0.3 mmol), Fe(II) complexes (5 mol%) and 4 Å MS (100 mg). The flask was evacuated and backfilled with argon three times. Then freshly distilled solvent (3 mL) was added via syringe at reaction temperature. The reaction mixture was stirred at the same temperature until compound **4** was completely consumed (monitored by TLC). The residue was purified by flash chromatography on a silica gel column (eluent: hexane/EA = 8:1–5:1 v/v) to give the corresponding products **5**, **6**, **7**, **9** and **11**.

**Table S1** Screening of the iron complexes in the asymmetric alkylation of *N*-methylindole **3a** to  $\alpha,\beta$ -unsaturated 2-acyl imidazole **4a**.<sup>a</sup>

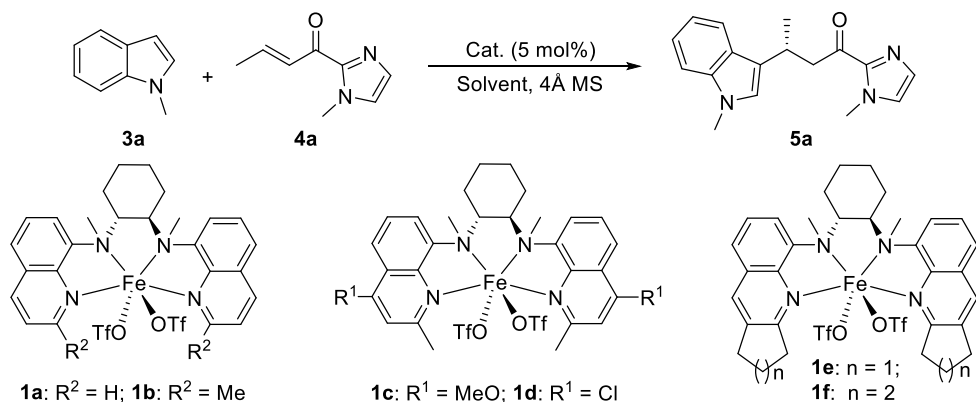

| Entry     | Cat.      | Solvent/T (°C)                           | Time (h)  | Yield (%) <sup>b</sup> | ee (%) <sup>c</sup> |
|-----------|-----------|------------------------------------------|-----------|------------------------|---------------------|
| 1         | <b>1a</b> | CH <sub>2</sub> Cl <sub>2</sub> /5       | 10        | 91                     | 73                  |
| 2         | <b>1b</b> | CH <sub>2</sub> Cl <sub>2</sub> /5       | 10        | 98                     | 79                  |
| 3         | <b>1c</b> | CH <sub>2</sub> Cl <sub>2</sub> /5       | 15        | 90                     | 69                  |
| 4         | <b>1d</b> | CH <sub>2</sub> Cl <sub>2</sub> /5       | 12        | 87                     | 57                  |
| 5         | <b>1e</b> | CH <sub>2</sub> Cl <sub>2</sub> /5       | 10        | 99                     | 85                  |
| 6         | <b>1f</b> | CH <sub>2</sub> Cl <sub>2</sub> /5       | 10        | 94                     | 71                  |
| 7         | <b>1e</b> | CH <sub>2</sub> Cl <sub>2</sub> /-15     | 24        | 95                     | 90                  |
| 8         | <b>1e</b> | ClCH <sub>2</sub> CH <sub>2</sub> Cl/-15 | 24        | 97                     | 93                  |
| 9         | <b>1e</b> | CH <sub>3</sub> Cl/-15                   | 24        | 96                     | 91                  |
| 10        | <b>1e</b> | CH <sub>3</sub> CN/-15                   | 20        | 92                     | 95                  |
| <b>11</b> | <b>1e</b> | <b>CH<sub>3</sub>CN/-25</b>              | <b>48</b> | <b>91</b>              | <b>97.5</b>         |

<sup>a</sup> Unless otherwise noted, all reactions were carried out with **3a** (0.45 mmol), **4a** (0.3 mmol), Cat. (5 mol%) and 4 Å MS (100 mg) in 3 mL of solvent under argon. <sup>b</sup> Yield of isolated product. <sup>c</sup> Determined by chiral-phase HPLC.

**Table S2** Condition optimization of C2 alkylation of 3-methyl-indole **3i** with  $\alpha,\beta$ -unsaturated 2-acyl imidazole **4a** catalyzed by Fe(II) complexes<sup>a</sup>

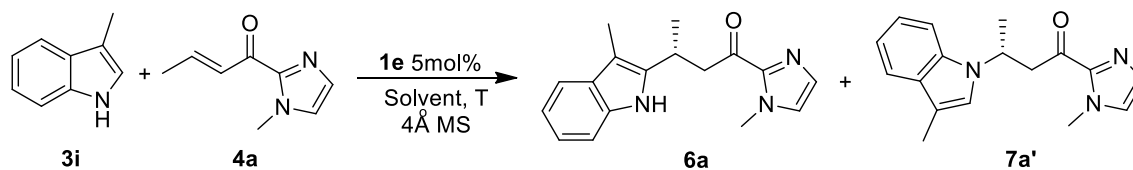

| Entry          | Solvent/T (°C)                          | Time (h) | <b>6a/7a'</b> <sup>b</sup> | Yield (%)/ <b>6a</b> <sup>c</sup> | ee (%)/ <b>6a</b> <sup>d</sup> |
|----------------|-----------------------------------------|----------|----------------------------|-----------------------------------|--------------------------------|
| 1 <sup>e</sup> | CH <sub>2</sub> Cl <sub>2</sub> /25     | 3        | 83:17                      | 80                                | 83                             |
| 2              | CH <sub>2</sub> Cl <sub>2</sub> /25     | 3        | 85:15                      | 83                                | 87                             |
| 3              | ClCH <sub>2</sub> CH <sub>2</sub> Cl/25 | 3        | 86:14                      | 85                                | 86                             |
| 4              | CH <sub>3</sub> CN/25                   | 12       | -                          | NR <sup>f</sup>                   | -                              |
| 5              | CH <sub>2</sub> Cl <sub>2</sub> /0      | 12       | 87:13                      | 85                                | 90.5                           |
| 6              | CH <sub>2</sub> Cl <sub>2</sub> /-20    | 36       | >90:10                     | 84                                | 93                             |
| 7              | CH <sub>2</sub> Cl <sub>2</sub> /-40    | 60       | >90:10                     | 85                                | 96                             |

<sup>a</sup> All reactions were carried out with **3i** (0.45 mmol), **4a** (0.3 mmol), Cat. (5 mol%) and 4 Å MS (100 mg) in 3 mL of solvent under argon. <sup>b</sup> Determined by crude <sup>1</sup>H NMR. <sup>c</sup> Yield of isolated product. <sup>d</sup> Determined by chiral-phase HPLC. <sup>e</sup> **1b** was used. <sup>f</sup> NR = no reaction.

**Table S3** Condition optimization of asymmetric alkylation of 1-phenyl pyrrolidine **10a** with  $\alpha,\beta$ -unsaturated 2-acyl imidazole **4b** catalyzed by Fe(II) complexes<sup>a</sup>

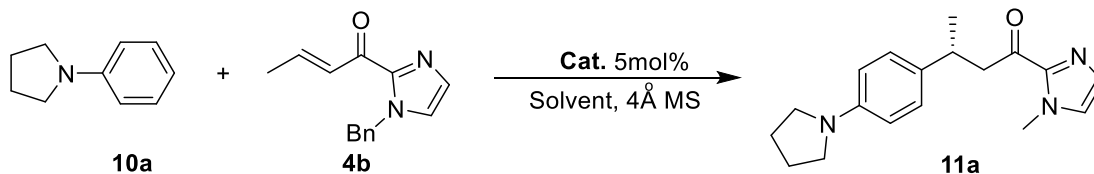

| Entry          | Cat.      | Solvent/T (°C)                      | Time (h) | Yield (%) <sup>b</sup> | ee (%) <sup>c</sup> |
|----------------|-----------|-------------------------------------|----------|------------------------|---------------------|
| 1 <sup>d</sup> | <b>1b</b> | CH <sub>2</sub> Cl <sub>2</sub> /25 | 24       | 44                     | 59                  |
| 2              | <b>1b</b> | CH <sub>2</sub> Cl <sub>2</sub> /25 | 20       | 89                     | 69                  |
| 3              | <b>1e</b> | CH <sub>2</sub> Cl <sub>2</sub> /25 | 20       | 85                     | 74                  |
| 4              | <b>1e</b> | CH <sub>3</sub> Cl/25               | 20       | 90                     | 75                  |
| 5              | <b>1e</b> | CH <sub>3</sub> CN/25               | 20       | 88                     | 81                  |
| 6              | <b>1e</b> | CH <sub>3</sub> CN/0                | 40       | 87                     | 88                  |
| 7              | <b>1e</b> | CH <sub>3</sub> CN/-25              | 70       | 87                     | 94                  |

<sup>a</sup> All reactions were carried out with **10a** (0.45 mmol), **4b** (0.3 mmol), Cat. (5 mol%) and 4 Å MS (100 mg) in 3 mL of solvent under argon. <sup>b</sup> Yield of isolated product. <sup>c</sup> Determined by chiral-phase HPLC. <sup>d</sup> **4a** instead of **4b**.

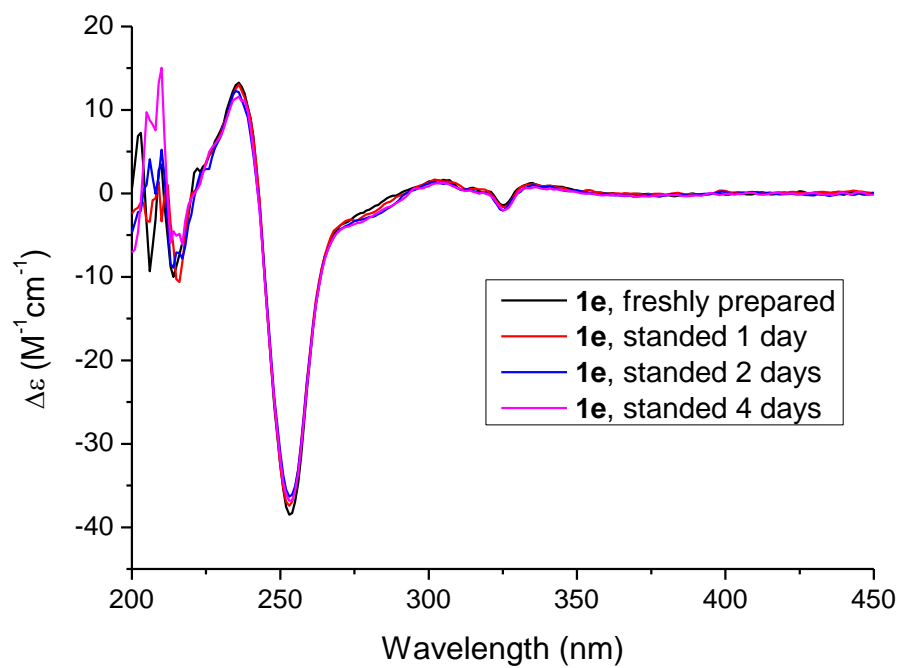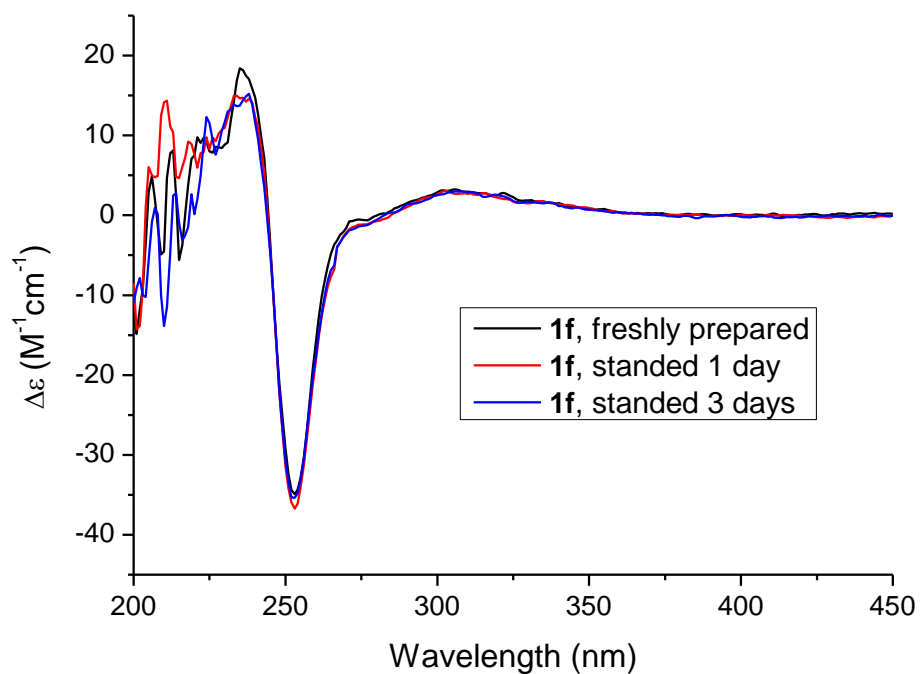

**Fig. S1** CD spectra of **1e** (upper) and **1f** (lower) recorded in CH<sub>3</sub>CN (0.3 mM) at various time intervals.

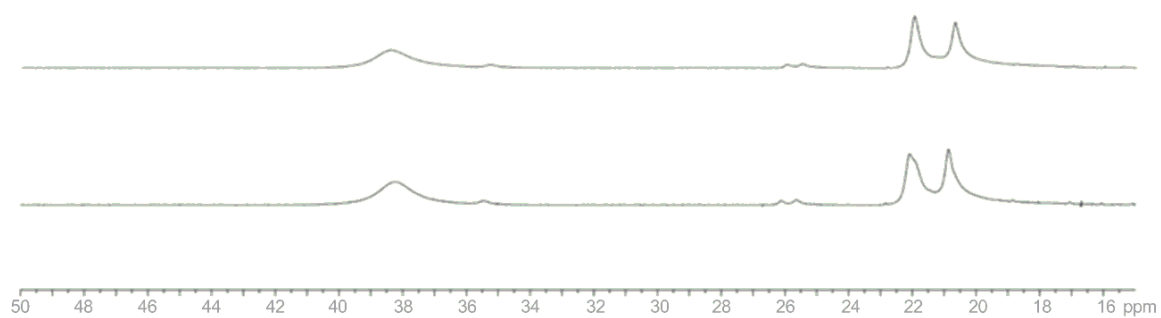

**Fig. S2**  $^1\text{H}$  NMR spectra (in the low-field region of 15–50 ppm) of **1e** in  $\text{CD}_3\text{CN}$  at room temperature measured for freshly prepared solution (bottom) and after the solution was kept standing at room temperature for 8 days (top).

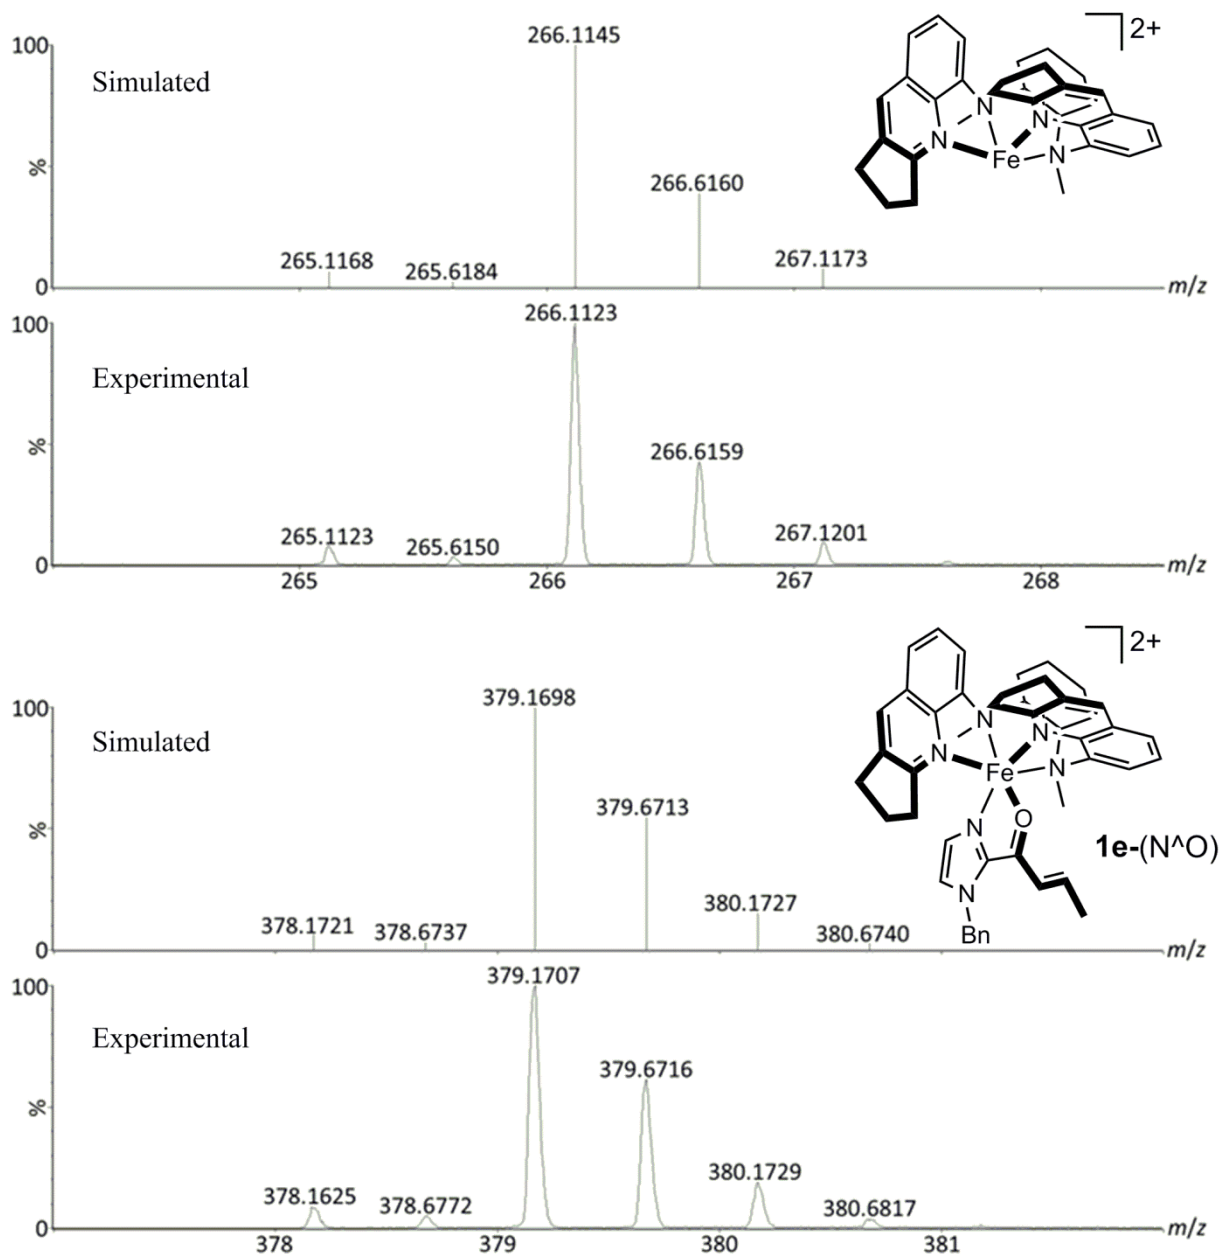

**Fig. S3** ESI-MS spectral analysis of the reaction intermediate. Upper: a solution of Fe(II) complex **1e** ( $1 \times 10^{-5}$  M) in acetonitrile. Lower: a reaction mixture of Fe complex ( $1 \times 10^{-5}$  M) and organic substrate **4b** (2.0 equiv) in acetonitrile.

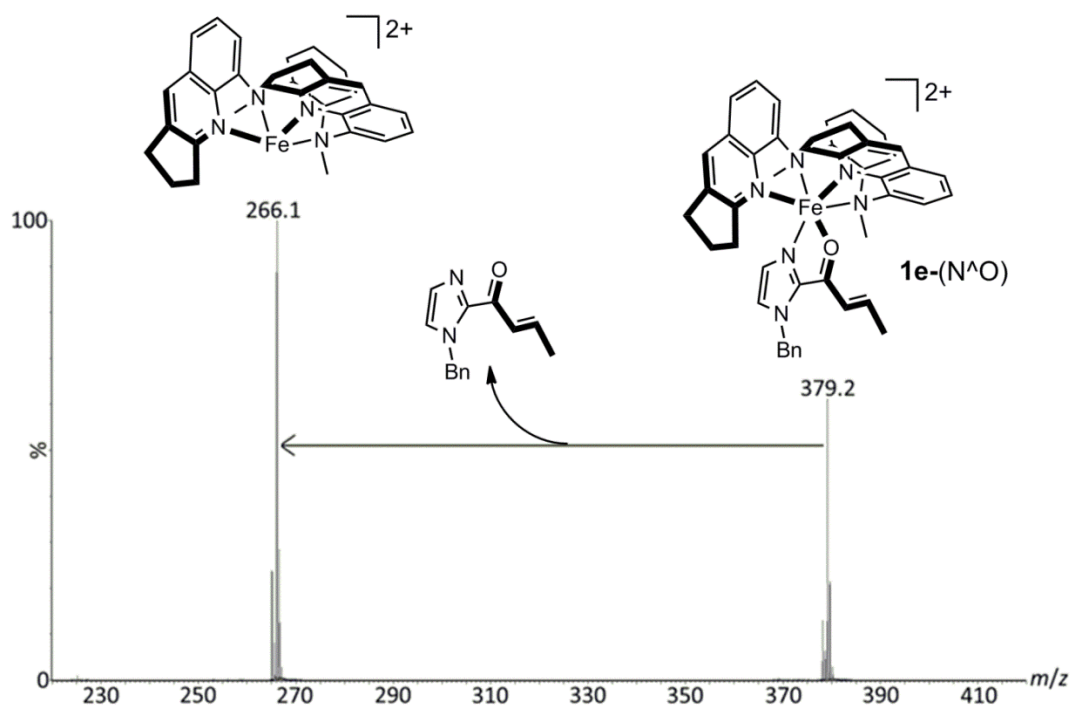

**Fig. S4** Collision-induced dissociation of **1e-(N<sup>^O</sup>)** ( $m/z$  379.2) gave  $[\text{Fe}^{\text{II}}(\mathbf{2e})]^{2+}$  ( $m/z$  226.1), through the loss of **4b** (collision energy: 8 eV).

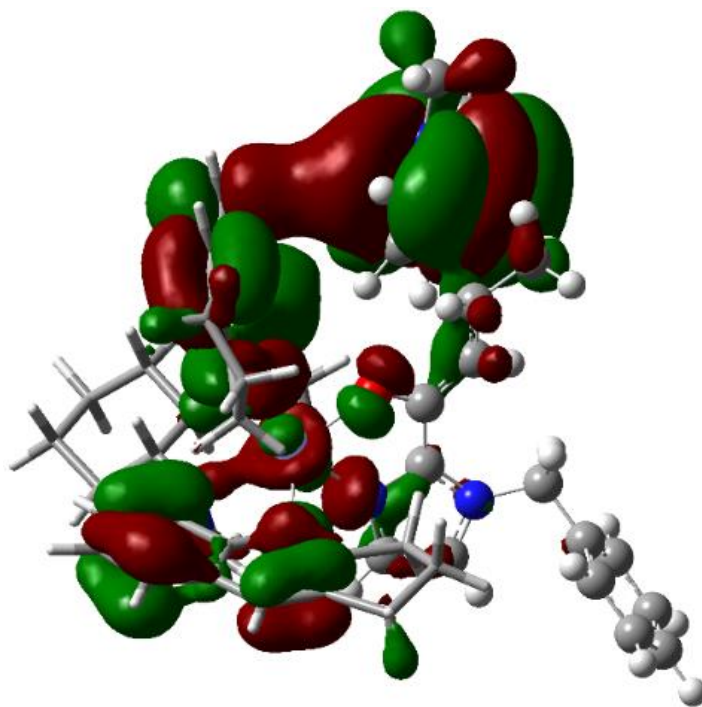

**Fig. S5** Molecular orbital of  $\pi$ - $\pi$  interaction between quinoline and indole moieties in **TSA<sub>2R</sub>**.

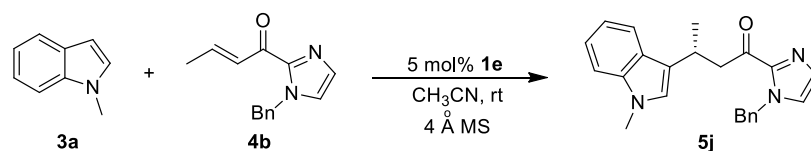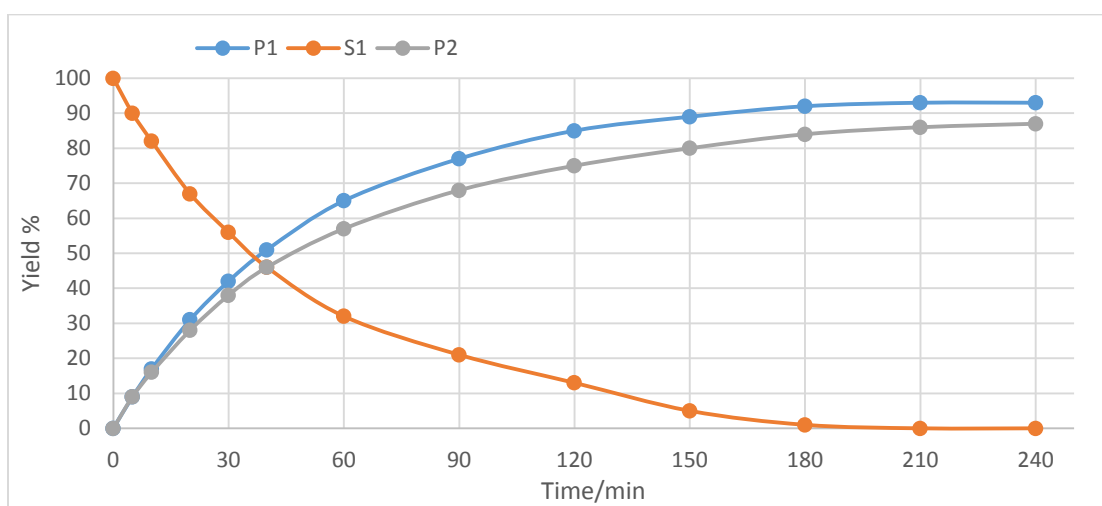

**Fig. S6** Time-course plots for alkylation of *N*-methylindole **3a** with **4b** in CH<sub>3</sub>CN catalyzed by **1e** at room temperature under conditions A (blue line) and B (grey line). Reaction condition for A: **3a** (0.45 mmol), **4b** (0.3 mmol), **1e** (5 mol%) under argon; reaction condition for B: **3a** (0.45 mmol), **4b** (0.3 mmol), **5j** (0.06 mmol, 20 mol%), **1e** (5 mol%) under argon. P1 and P2: product **5j** generated under conditions A and B, respectively. S1: starting material **4b** (orange line).



## Characterization data of products

Table S4 Reported products in literature

| Products                                                                                             | References                                                                                                                                                                                                                     |
|------------------------------------------------------------------------------------------------------|--------------------------------------------------------------------------------------------------------------------------------------------------------------------------------------------------------------------------------|
| 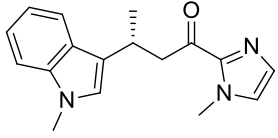 <p><b>5a</b></p>   | (a) D. A. Evans, K. R. Fandrick and H.-J. Song, <i>J. Am. Chem. Soc.</i> , 2005, <b>127</b> , 8942; (b) D. A. Evans, K. R. Fandrick, H.-J. Song, K. A. Scheidt and R. Xu, <i>J. Am. Chem. Soc.</i> , 2007, <b>129</b> , 10029. |
|  <p><b>5b</b></p>   | (a) D. A. Evans, K. R. Fandrick and H.-J. Song, <i>J. Am. Chem. Soc.</i> , 2005, <b>127</b> , 8942; (b) D. A. Evans, K. R. Fandrick, H.-J. Song, K. A. Scheidt and R. Xu, <i>J. Am. Chem. Soc.</i> , 2007, <b>129</b> , 10029. |
|  <p><b>5c</b></p>   | (a) D. A. Evans, K. R. Fandrick and H.-J. Song, <i>J. Am. Chem. Soc.</i> , 2005, <b>127</b> , 8942; (b) D. A. Evans, K. R. Fandrick, H.-J. Song, K. A. Scheidt and R. Xu, <i>J. Am. Chem. Soc.</i> , 2007, <b>129</b> , 10029. |
|  <p><b>5e</b></p>  | (a) D. A. Evans, K. R. Fandrick and H.-J. Song, <i>J. Am. Chem. Soc.</i> , 2005, <b>127</b> , 8942; (b) D. A. Evans, K. R. Fandrick, H.-J. Song, K. A. Scheidt and R. Xu, <i>J. Am. Chem. Soc.</i> , 2007, <b>129</b> , 10029. |
|  <p><b>5g</b></p> | (a) D. A. Evans, K. R. Fandrick and H.-J. Song, <i>J. Am. Chem. Soc.</i> , 2005, <b>127</b> , 8942; (b) D. A. Evans, K. R. Fandrick, H.-J. Song, K. A. Scheidt and R. Xu, <i>J. Am. Chem. Soc.</i> , 2007, <b>129</b> , 10029. |
|  <p><b>5h</b></p> | (a) D. A. Evans, K. R. Fandrick and H.-J. Song, <i>J. Am. Chem. Soc.</i> , 2005, <b>127</b> , 8942; (b) D. A. Evans, K. R. Fandrick, H.-J. Song, K. A. Scheidt and R. Xu, <i>J. Am. Chem. Soc.</i> , 2007, <b>129</b> , 10029. |
|  <p><b>5i</b></p> | D. A. Evans, K. R. Fandrick and H.-J. Song, <i>J. Am. Chem. Soc.</i> , 2005, <b>127</b> , 8942.                                                                                                                                |
|  <p><b>5j</b></p> | D. A. Evans, K. R. Fandrick, H.-J. Song, K. A. Scheidt and R. Xu, <i>J. Am. Chem. Soc.</i> , 2007, <b>129</b> , 10029.                                                                                                         |

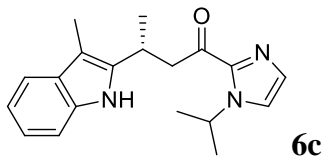

Z. Zhou, Y. Li, L. Gong and E. Meggers, *Org. Lett.*, 2017, **19**, 222.

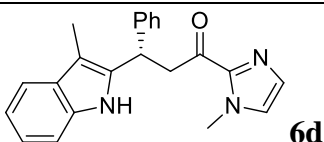

Z. Zhou, Y. Li, L. Gong and E. Meggers, *Org. Lett.*, 2017, **19**, 222.

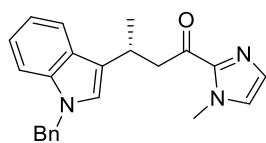

**(R)-3-(1-(1-Benzyl-1H-indol-3-yl)-1-(1-methyl-1H-imidazol-2-yl)butan-1-one (5b)**

<sup>1</sup>H NMR (400 MHz, CDCl<sub>3</sub>): 7.68(d, *J*=7.56 Hz, 1H), 7.27-7.21(m, 4H), 7.14-7.06(m, 5H), 7.01(s, 1H), 6.97(s, 1H), 5.24(s, 2H), 3.91(s, 3H), 3.91-3.82(m, 1H), 3.56(dd, *J*=6.28, 15.76 Hz, 1H), 3.46(dd, *J*=8.32, 15.72 Hz, 1H), 1.43(d, *J*=6.96 Hz, 2H); <sup>13</sup>C NMR (100 MHz, CDCl<sub>3</sub>): δ 192.46, 143.08, 137.86, 136.77, 128.99, 128.75, 127.52, 127.35, 126.89, 126.81, 124.60, 121.71, 120.76, 119.57, 118.90, 109.68, 49.98, 46.87, 36.20, 27.33, 21.83; HRMS (EI) *m/z* [M]<sup>+</sup> Calcd for C<sub>23</sub>H<sub>23</sub>N<sub>3</sub>O 357.1841, found 357.1830.

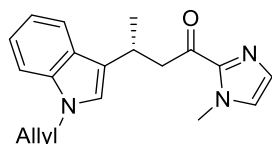

**(R)-3-(1-(1-Allyl-1H-indol-3-yl)-1-(1-methyl-1H-imidazol-2-yl)butan-1-one (5c)**

<sup>1</sup>H NMR (400 MHz, CDCl<sub>3</sub>): δ 7.67(d, *J*=7.88 Hz, 1H), 7.26(d, *J*=8.20 Hz, 1H), 7.17-7.08(m, 3H), 6.97(s, 2H), 5.96-5.92(m, 1H), 5.16(dd, *J*=1.4, 10.24 Hz, 1H), 5.05(dd, *J*=1.44, 17.08 Hz, 1H), 4.66-4.64(m, 2H), 3.91(s, 3H), 3.90-3.83(m, 1H), 3.57-3.43(m, 2H), 1.42(d, *J*=6.88 Hz, 3H); <sup>13</sup>C NMR (100 MHz, CDCl<sub>3</sub>): δ 192.52, 143.53, 136.60, 133.80, 129.05, 127.33, 126.97, 124.19, 121.59, 120.55, 119.60, 118.86, 117.23, 109.61, 48.81, 46.96, 36.28, 27.32, 21.93; HRMS (EI) *m/z* [M]<sup>+</sup> Calcd for C<sub>19</sub>H<sub>21</sub>N<sub>3</sub>O 307.1685, found 307.1678.

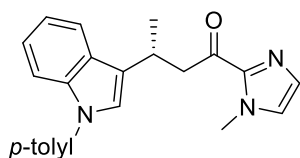

**(R)-1-(1-(1-Methyl-1H-imidazol-2-yl)-3-(1-(p-tolyl)-1H-indol-3-yl)butan-1-one (5d)**

<sup>1</sup>H NMR (400 MHz, CDCl<sub>3</sub>): δ 7.73(d, *J*=7.28 Hz, 1H), 7.50(d, *J*=7.92 Hz, 1H), 7.34(d, *J*=8.28 Hz, 2H), 7.28(d, *J*=8.12 Hz, 2H), 7.21-7.13(m, 4H), 6.99(s, 1H), 3.94(s, 3H), 3.92-3.86(m, 1H), 3.65(dd, *J*=6.20, 15.84 Hz, 1H), 3.48(dd, *J*=8.16, 15.88 Hz, 1H), 2.42(s, 3H), 1.46(d, *J*=6.92 Hz, 3H); <sup>13</sup>C NMR (100 MHz, CDCl<sub>3</sub>): δ 192.33, 144.01, 143.00, 137.48, 136.28, 135.88, 130.11, 129.04, 128.02, 126.92, 124.34, 124.11, 122.26, 120.26, 119.66, 110.55, 46.68, 36.24, 27.17, 21.74, 21.08; HRMS (EI) *m/z* [M]<sup>+</sup> Calcd for C<sub>23</sub>H<sub>23</sub>N<sub>3</sub>O 357.1841, found 357.1832.

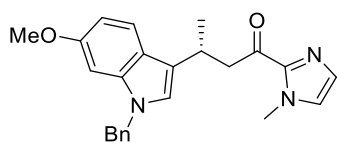

**(R)-3-(1-(1-Benzyl-6-methoxy-1H-indol-3-yl)-1-(1-methyl-1H-imidazol-2-yl)butan-1-one (5e)**

<sup>1</sup>H NMR (400 MHz, CDCl<sub>3</sub>): δ 7.54(d, *J*=8.68 Hz, 1H), 7.28-7.25(m, 3H), 7.12(s, 1H), 7.08-7.06(m, 2H), 6.97(s, 1H), 6.88(s, 1H), 6.79-6.671(m, 1H), 6.67(s, 1H), 5.18(s, 2H), 3.91(s, 3H), 3.83-3.77(m, 1H), 3.77(s, 3H), 3.53(dd, *J*=6.24, 15.68 Hz, 1H), 3.43(dd, *J*=8.32, 15.68 Hz, 1H), 1.40(d, *J*=6.88 Hz, 3H); <sup>13</sup>C NMR (100 MHz, CDCl<sub>3</sub>): δ 192.54, 156.41, 143.44, 137.86, 137.58, 129.06, 128.81, 127.56, 126.94, 126.86,

123.51, 121.89, 120.89, 120.24, 108.65, 93.57, 55.84, 49.99, 46.98, 36.28, 27.44, 21.87; HRMS (EI)  $m/z$   $[M]^+$  Calcd for  $C_{24}H_{25}N_3O_2$  387.1947, found 387.1945.

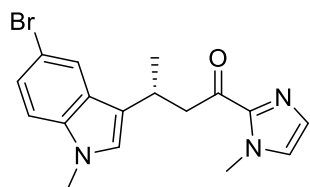

**(R)-3-(5-Bromo-1-methyl-1H-indol-3-yl)-1-(1-methyl-1H-imidazol-2-yl)butan-1-one (5f)**

$^1H$  NMR (400 MHz,  $CDCl_3$ ):  $\delta$  7.67(d,  $J=1.63$  Hz, 1H), 7.23(dd,  $J=1.84, 8.64$  Hz, 1H), 7.13(s, 1H), 7.09(d,  $J=8.64$  Hz, 1H), 6.99(s, 1H), 6.91(s, 1H), 3.89(s, 3H), 3.78-3.73(m, 1H), 3.67(s, 3H), 3.49-3.39(m, 2H), 1.39(d,  $J=6.92$  Hz, 3H);  $^{13}C$  NMR (100 MHz,  $CDCl_3$ ):  $\delta$  192.17, 143.37, 135.79, 129.07, 128.80, 127.07, 126.40, 124.34, 121.98, 119.82, 112.15, 110.73, 47.34, 36.22, 32.92, 27.23, 21.96; HRMS (EI)  $m/z$   $[M]^+$  Calcd for  $C_{17}H_{18}N_3OBr$  359.0633, found 359.0626.

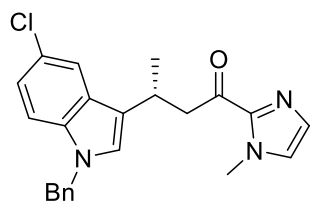

**(R)-3-(1-Benzyl-5-chloro-1H-indol-3-yl)-1-(1-methyl-1H-imidazol-2-yl)butan-1-one (5g)**

$^1H$  NMR (400 MHz,  $CDCl_3$ ):  $\delta$  7.57(s, 1H), 7.26-7.24(m, 3H), 7.13-6.98(m, 7H), 5.22(s, 2H), 3.90(s, 3H), 3.79-3.77(m, 1H), 3.52-3.39(m, 2H), 1.41(d,  $J=6.92$  Hz, 3H);  $^{13}C$  NMR (100 MHz,  $CDCl_3$ ):  $\delta$  192.22, 143.41, 137.44, 135.15, 129.09, 128.89, 128.47, 127.76, 127.05, 126.75, 126.05, 124.82, 122.04, 120.53, 119.07, 110.79, 50.28, 47.13, 36.23, 27.32, 21.78; HRMS (EI)  $m/z$   $[M]^+$  Calcd for  $C_{23}H_{22}ClN_3O$  391.1451, found 391.1449.

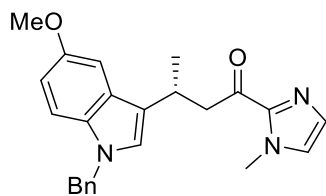

**(R)-3-(1-Benzyl-5-methoxy-1H-indol-3-yl)-1-(1-methyl-1H-imidazol-2-yl)butan-1-one (5h)**

$^1H$  NMR (400 MHz,  $CDCl_3$ ):  $\delta$  7.27-7.24(m, 3H), 7.18-7.04(m, 5H), 6.99(d,  $J=5.56$  Hz, 2H), 6.79(d,  $J=8.84$  Hz, 1H), 5.21(s, 2H), 3.92(s, 3H), 3.86(s, 3H), 3.86-3.80(m, 1H), 3.60-3.55(m, 1H), 3.42-3.36(m, 1H), 1.42(dd,  $J=2.40, 6.88$  Hz, 3H);  $^{13}C$  NMR (100 MHz,  $CDCl_3$ ):  $\delta$  192.60, 153.80, 143.55, 138.02, 132.10, 129.05, 128.79, 127.73, 127.56, 126.95, 126.80, 125.28, 120.32, 112.01, 110.52, 101.47, 56.06, 50.27, 47.01, 36.23, 27.44, 21.66; HRMS (EI)  $m/z$   $[M]^+$  Calcd for  $C_{24}H_{25}N_3O_2$  387.1947, found 387.1945.

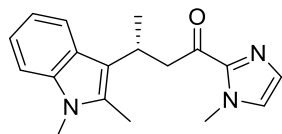

**(R)-3-(1,2-Dimethyl-1H-indol-3-yl)-1-(1-methyl-1H-imidazol-2-yl)butan-1-one (5i)**

$^1H$  NMR (400 MHz,  $CDCl_3$ ):  $\delta$  7.71(d,  $J=7.88$  Hz, 1H), 7.21(d,  $J=8.04$  Hz, 1H), 7.11-7.09(m, 2H), 7.05-7.03(m, 1H), 6.92(s, 1H), 3.86(s, 3H), 3.86-3.80(m, 1H), 3.65-3.62(m, 2H), 3.61(s, 3H), 2.42(s, 3H), 1.48(d,  $J=7.16$  Hz, 3H);  $^{13}C$  NMR (100 MHz,  $CDCl_3$ ):  $\delta$  192.51, 143.46, 136.89, 132.39, 128.95, 126.69, 126.40, 120.26, 119.45, 118.58, 115.00, 108.69, 46.53, 36.11, 29.53, 27.49, 21.49, 10.73; HRMS (EI)  $m/z$   $[M]^+$  Calcd for  $C_{18}H_{21}N_3O$  295.1685, found 295.1676.

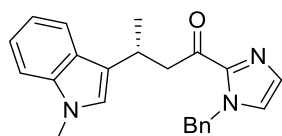

**(R)-1-(1-Benzyl-1H-imidazol-2-yl)-3-(1-methyl-1H-indol-3-yl)butan-1-one (5j)**

$^1H$  NMR (400 MHz,  $CDCl_3$ ):  $\delta$  7.69(d,  $J=7.92$  Hz, 1H), 7.28-7.26(m, 4H), 7.23-7.18(m, 2H), 7.11-7.07(m, 3H), 7.02(s, 1H), 6.90(s, 1H), 5.56(s, 2H), 3.84(q,  $J=7.0, 14.32$  Hz, 1H), 3.69(s, 3H), 3.60(dd,  $J=6.52, 15.56$  Hz, 1H), 3.46(dd,  $J=8.16, 15.56$  Hz, 1H), 1.39(d,  $J=6.88$  Hz, 3H);  $^{13}C$  NMR (100 MHz,  $CDCl_3$ ):  $\delta$  192.58, 143.03, 137.14,

136.54, 129.44, 128.87, 128.06, 127.64, 127.07, 125.85, 125.18, 121.51, 120.03, 119.54, 118.66, 109.20, 51.79, 47.19, 32.67, 27.45, 21.98; HRMS (EI)  $m/z$   $[M]^+$  Calcd for  $C_{23}H_{23}N_3O$  357.1841, found 357.1831.

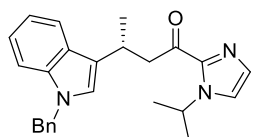

**(R)-3-(1-Benzyl-1H-indol-3-yl)-1-(1-isopropyl-1H-imidazol-2-yl)butan-1-one (5k)**

$^1H$  NMR (400 MHz,  $CDCl_3$ ):  $\delta$  7.70(d,  $J=7.52$  Hz, 1H), 7.27-7.20(m, 5H), 7.17-7.06(m, 5H), 7.02(s, 1H), 5.51-5.44(m, 1H), 5.25(s, 2H), 3.91-3.85(m, 1H), 3.59(dd,  $J=6.36$ , 15.68 Hz, 1H), 3.49(dd,  $J=8.32$ , 15.64 Hz, 1H), 1.44(d,  $J=6.88$  Hz, 3H), 1.36(t,  $J=6.80$  Hz, 6H);  $^{13}C$  NMR (100 MHz,  $CDCl_3$ ):  $\delta$  192.60, 142.79, 137.88, 136.75, 129.47, 128.75, 127.52, 127.39, 126.81, 124.63, 121.69, 121.01, 120.81, 119.62, 118.92, 109.68, 49.99, 49.20, 47.51, 27.44, 23.63, 21.89; HRMS (EI)  $m/z$   $[M]^+$  Calcd for  $C_{25}H_{27}N_3O$  385.2154, found 385.2149.

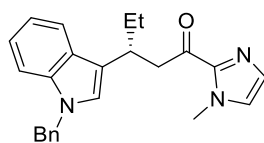

**(R)-3-(1-Benzyl-1H-indol-3-yl)-1-(1-methyl-1H-imidazol-2-yl)pentan-1-one (5l)**

$^1H$  NMR (400 MHz,  $CDCl_3$ ):  $\delta$  7.66-7.64(m, 1H), 7.26-7.18(m, 4H), 7.12-7.01(m, 6H), 6.93(s, 1H), 5.24(s, 2H), 3.82(s, 3H), 3.70-3.66(m, 1H), 3.54(dd,  $J=0.88$ , 7.00 Hz, 2H), 1.88-1.80(m, 2H), 0.89(t,  $J=7.32$  Hz, 3H);  $^{13}C$  NMR (100 MHz,  $CDCl_3$ ):  $\delta$  192.60, 143.57, 138.01, 136.77, 128.96, 128.78, 127.94, 127.53, 126.85, 126.74, 125.71, 121.63, 119.77, 118.89, 118.54, 109.70, 49.99, 45.13, 36.17, 34.24, 29.11, 12.13; HRMS (EI)  $m/z$   $[M]^+$  Calcd for  $C_{24}H_{25}N_3O$  371.1998, found 371.1996.

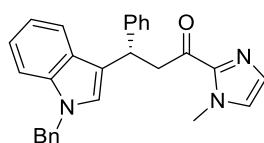

**(S)-3-(1-Benzyl-1H-indol-3-yl)-1-(1-methyl-1H-imidazol-2-yl)-3-phenylpropan-1-one (5m)**

$^1H$  NMR (400 MHz,  $CDCl_3$ ):  $\delta$  7.50(d,  $J=7.92$  Hz, 1H), 7.43-7.41(m, 2H), 7.27-7.23(m, 5H), 7.21-7.00(m, 8H), 6.93(s, 1H), 5.24(d,  $J=1.68$  Hz, 2H), 5.09(t,  $J=7.68$  Hz, 1H), 4.01(dd,  $J=7.40$ , 16.26 Hz, 1H), 3.89-3.83(m, 1H), 3.85(s, 3H);  $^{13}C$  NMR (100 MHz,  $CDCl_3$ ):  $\delta$  191.24, 144.62, 143.38, 137.89, 137.00, 129.12, 128.81, 128.48, 128.11, 127.67, 127.59, 127.03, 126.81, 126.29, 125.91, 121.95, 119.89, 119.19, 118.66, 109.70, 50.09, 45.54, 38.42, 36.21; HRMS (EI)  $m/z$   $[M]^+$  Calcd for  $C_{28}H_{25}N_3O$  419.1998, found 419.1995.

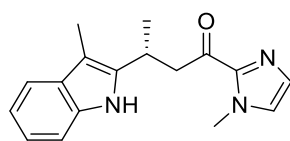

**(R)-1-(1-Methyl-1H-imidazol-2-yl)-3-(3-methyl-1H-indol-2-yl)butan-1-one (6a)**

$^1H$  NMR (400 MHz,  $CDCl_3$ ):  $\delta$  8.53(s, 1H), 7.45(d,  $J=8.38$  Hz, 1H), 7.25(d,  $J=8.12$  Hz, 1H), 7.13-7.04(m, 3H), 6.97(s, 1H), 3.91(s, 3H), 3.86-3.80(m, 1H), 3.72(dd,  $J=8.25$ , 15.67 Hz, 1H), 3.30(dd,  $J=6.20$ , 15.67 Hz, 1H), 2.25(s, 3H), 1.39(d,  $J=7.02$  Hz, 3H);  $^{13}C$  NMR (100 MHz,  $CDCl_3$ ):  $\delta$  191.50, 138.12, 135.41, 129.38, 129.12, 128.70, 127.34, 121.05, 118.95, 118.20, 110.60, 106.40, 44.84, 36.31, 28.04, 21.05, 8.58; HRMS (EI)  $m/z$   $[M]^+$  Calcd for  $C_{17}H_{19}N_3O$  281.1528, found 281.1525.

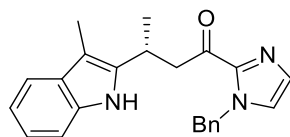

**(R)-1-(1-Benzyl-1H-imidazol-2-yl)-3-(3-methyl-1H-indol-2-yl)butan-1-one (6b)**

$^1H$  NMR (400 MHz,  $CDCl_3$ ):  $\delta$  8.41(s, 1H), 7.46(d,  $J=6.87$  Hz, 1H), 7.26-7.22(m, 4H), 7.16(d,  $J=0.88$  Hz, 1H), 7.07-6.99(m, 5H), 5.54(d,  $J=6.92$  Hz, 2H), 3.91-3.79(m, 1H), 3.72(dd,  $J=8.38$ , 15.28 Hz, 1H), 3.30(dd,  $J=6.19$ , 15.27 Hz,

1H), 2.21(s, 3H), 1.36(d,  $J=6.96$  Hz, 3H);  $^{13}\text{C}$  NMR (100 MHz,  $\text{CDCl}_3$ ):  $\delta$  191.65, 142.85, 137.96, 136.23, 135.42, 129.55, 129.37, 128.98, 128.20, 127.60, 126.31, 121.09, 118.96, 118.26, 110.59, 106.49, 51.94, 45.07, 28.29, 21.04, 8.57; HRMS (EI)  $m/z$   $[\text{M}]^+$  Calcd for  $\text{C}_{23}\text{H}_{23}\text{N}_3\text{O}$  357.1841, found 357.1830.

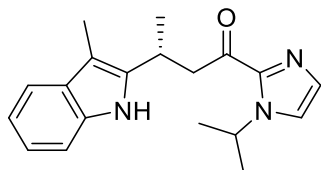

**(R)-1-(1-Isopropyl-1H-imidazol-2-yl)-3-(3-methyl-1H-indol-2-yl)butan-1-one (6c)**

$^1\text{H}$  NMR (400 MHz,  $\text{CDCl}_3$ ):  $\delta$  8.45(s, 1H), 7.44(d,  $J=7.59$  Hz, 1H), 7.26-7.21(m, 2H), 7.15(s, 1H), 7.09-7.01(m, 2H), 5.46-5.39(m, 1H), 3.85-3.80(m, 1H), 3.71(dd,  $J=8.27, 15.51$  Hz, 1H), 3.32(dd,  $J=6.31, 15.56$  Hz, 1H), 2.23(s, 3H), 1.40-1.33(m, 9H);  $^{13}\text{C}$  NMR (100 MHz,  $\text{CDCl}_3$ ):  $\delta$  191.66, 142.61, 138.12, 135.41, 129.56, 129.37, 127.99, 121.47, 121.04, 118.93, 118.19, 110.55, 49.36, 45.51, 28.18, 23.75, 23.50, 21.06, 8.57; HRMS (EI)  $m/z$   $[\text{M}]^+$  Calcd for  $\text{C}_{19}\text{H}_{23}\text{N}_3\text{O}$  309.1841, found 309.1837.

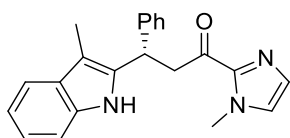

**(S)-1-(1-Methyl-1H-imidazol-2-yl)-3-(3-methyl-1H-indol-2-yl)-3-phenylpropan-1-one (6d)**

$^1\text{H}$  NMR (400 MHz,  $\text{CDCl}_3$ ):  $\delta$  8.73(s, 1H), 7.45(d,  $J=8.01$  Hz, 1H), 7.31-7.16(m, 7H), 7.09-7.04(m, 2H), 6.97(s, 1H), 5.07(dd,  $J=6.20, 9.25$  Hz, 1H), 4.21(dd,  $J=9.31, 16.01$  Hz, 1H), 3.88(s, 3H), 3.66(dd,  $J=6.20, 15.72$  Hz, 1H), 2.24(s, 3H);  $^{13}\text{C}$  NMR (100 MHz,  $\text{CDCl}_3$ ):  $\delta$  190.56, 143.23, 142.59, 135.76, 135.65, 129.41, 129.24, 128.78, 127.59, 127.50, 126.69, 121.23, 119.06, 118.38, 110.80, 107.88, 43.27, 38.62, 36.26, 8.71; HRMS (EI)  $m/z$   $[\text{M}]^+$  Calcd for  $\text{C}_{22}\text{H}_{21}\text{N}_3\text{O}$  343.1685, found 343.1675.

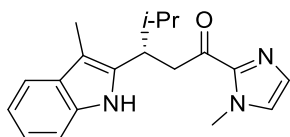

**(S)-4-Methyl-1-(1-methyl-1H-imidazol-2-yl)-3-(3-methyl-1H-indol-2-yl)pentan-1-one (6e)**

$^1\text{H}$  NMR (400 MHz,  $\text{CDCl}_3$ ):  $\delta$  8.43(s, 1H), 7.44(d,  $J=7.46$  Hz, 1H), 7.26-7.21(m, 1H), 7.10-7.02(m, 3H), 6.92(s, 1H), 3.90(dd,  $J=9.96, 15.90$  Hz, 1H), 3.82(s, 3H), 3.44-3.39(m, 1H), 3.24(dd,  $J=4.79, 15.90$  Hz, 1H), 2.21(s, 3H), 2.07-2.04(m, 1H), 1.02(d,  $J=6.66$  Hz, 3H), 0.87(d,  $J=6.71$  Hz, 3H);  $^{13}\text{C}$  NMR (100 MHz,  $\text{CDCl}_3$ ):  $\delta$  191.90, 143.31, 136.16, 135.50, 129.21, 128.96, 127.19, 120.90, 118.76, 118.14, 110.52, 108.25, 40.74, 40.01, 36.20, 33.15, 21.02, 20.74, 8.90; HRMS (EI)  $m/z$   $[\text{M}]^+$  Calcd for  $\text{C}_{19}\text{H}_{23}\text{N}_3\text{O}$  309.1841, found 309.1837.

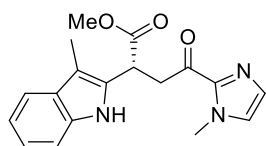

**(R)-Methyl 4-(1-methyl-1H-imidazol-2-yl)-2-(3-methyl-1H-indol-2-yl)-4-oxobutanoate (6f)**

$^1\text{H}$  NMR (400 MHz,  $\text{CDCl}_3$ ):  $\delta$  8.60(s, 1H), 7.50(d,  $J=7.76$  Hz, 1H), 7.27-7.25(m, 1H), 7.16-7.09(m, 2H), 7.07(t,  $J=6.76$  Hz, 1H), 7.00(s, 1H), 4.55(dd,  $J=5.48, 9.01$  Hz, 1H), 4.03-3.96(m, 4H), 3.77-3.71(m, 4H), 2.29(s, 3H);  $^{13}\text{C}$  NMR (100 MHz,  $\text{CDCl}_3$ ):  $\delta$  189.79, 173.42, 142.53, 135.82, 129.80, 129.51, 128.87, 127.36, 122.03, 119.25, 118.71, 110.89, 109.16, 52.69, 41.67, 38.09, 36.23, 8.60; HRMS (EI)  $m/z$   $[\text{M}]^+$  Calcd for  $\text{C}_{18}\text{H}_{29}\text{N}_3\text{O}_3$  325.1426, found 325.1419.

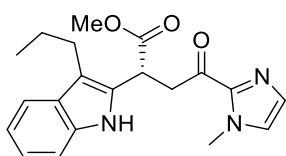

**(R)-Methyl 4-(1-methyl-1H-imidazol-2-yl)-4-oxo-2-(3-propyl-1H-indol-2-yl)butanoate (6g)**

$^1\text{H}$  NMR (400 MHz,  $\text{CDCl}_3$ ):  $\delta$  8.56(s, 1H), 7.53(d,  $J=7.56$  Hz, 1H), 7.26(d,  $J=8.04$  Hz, 1H), 7.13-7.11(m, 2H), 7.11-7.08(m, 1H), 7.07-

7.06(m, 1H), 7.01(s, 1H), 4.54(dd,  $J=5.04, 9.41$  Hz, 1H), 4.03(dd,  $J=9.42, 18.04$  Hz, 1H), 3.97(s, 3H), 3.72-3.66(m, 4H), 2.75-2.70(m, 2H), 1.68-1.63(m, 2H), 0.95(t,  $J=7.37$ Hz, 3H);  $^{13}\text{C}$  NMR (100 MHz,  $\text{CDCl}_3$ ):  $\delta$  189.86, 173.55, 142.48, 135.97, 129.79, 129.52, 128.27, 127.36, 121.95, 119.19, 119.04, 114.24, 110.95, 52.68, 42.15, 38.02, 36.25, 26.29, 24.21, 14.36; HRMS (EI)  $m/z$   $[\text{M}]^+$  Calcd for  $\text{C}_{20}\text{H}_{23}\text{N}_3\text{O}_3$  353.1739, found 353.1738.

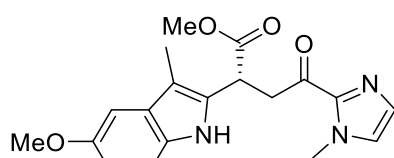

**(R)-Methyl-2-(5-methoxy-3-methyl-1H-indol-2-yl)-4-(1-methyl-1H-imidazol-2-yl)-4-oxo-butanoate (6h)**

$^1\text{H}$  NMR (400 MHz,  $\text{CDCl}_3$ ):  $\delta$  8.51(s, 1H), 7.16-7.12(m, 2H), 7.00(s, 1H), 6.93(d,  $J=2.24$  Hz, 1H), 6.79(dd,  $J=2.38, 8.72$  Hz, 1H), 4.52(dd,  $J=5.44, 9.04$  Hz, 1H), 4.02-3.95(m, 4H), 3.84(s, 3H), 3.75-3.69(m, 4H), 2.26(s, 3H);  $^{13}\text{C}$  NMR (100 MHz,  $\text{CDCl}_3$ ):  $\delta$  189.79, 173.36, 154.01, 142.53, 130.99, 130.67, 129.48, 129.22, 127.33, 112.06, 111.62, 108.90, 100.81, 56.12, 52.66, 41.64, 38.18, 36.21, 8.67; HRMS (EI)  $m/z$   $[\text{M}]^+$  Calcd for  $\text{C}_{19}\text{H}_{21}\text{N}_3\text{O}_4$  355.1532, found 355.1519.

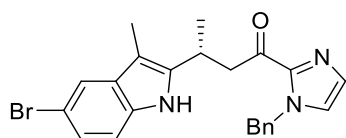

**(R)-1-(1-Benzyl-1H-imidazol-2-yl)-3-(5-bromo-3-methyl-1H-indol-2-yl)butan-1-one (6i)**

$^1\text{H}$  NMR (400 MHz,  $\text{CDCl}_3$ ):  $\delta$  8.53(s, 1H), 7.55(d,  $J=1.81$  Hz, 1H), 7.26-7.22(m, 3H), 7.16-7.14(m, 2H), 7.09(d,  $J=8.49$  Hz, 1H), 7.00-7.98(m, 3H), 5.52(s, 2H), 3.77-3.70(m, 2H), 3.28-3.24(m, 1H), 2.14(s, 3H), 1.35(d,  $J=6.82$  Hz, 3H);  $^{13}\text{C}$  NMR (100 MHz,  $\text{CDCl}_3$ ):  $\delta$  191.47, 142.74, 139.39, 136.13, 134.01, 131.17, 129.53, 128.98, 128.25, 127.53, 126.43, 123.75, 120.93, 112.20, 111.99, 106.31, 51.96, 44.86, 29.84, 28.37, 20.94; HRMS (EI)  $m/z$   $[\text{M}]^+$  Calcd for  $\text{C}_{23}\text{H}_{22}\text{N}_3\text{OBr}$  435.0946, found 435.0940.

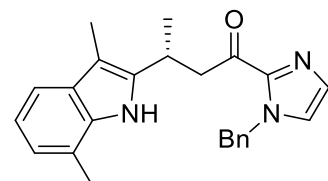

**(R)-1-(1-Benzyl-1H-imidazol-2-yl)-3-(3,7-dimethyl-1H-indol-2-yl)butan-1-one (6j)**

$^1\text{H}$  NMR (400 MHz,  $\text{CDCl}_3$ ):  $\delta$  8.52(s, 1H), 7.33(d,  $J=7.48$  Hz, 1H), 7.26-7.19(m, 4H), 7.03-7.00(m, 4H), 6.90(d,  $J=7.36$  Hz, 1H), 5.53(q,  $J=14.89$  Hz, 2H), 3.92-3.81(m, 2H), 3.23(dd,  $J=5.45, 14.33$  Hz, 1H), 2.44(s, 3H), 2.23(s, 3H), 1.39(d,  $J=6.83$  Hz, 3H);  $^{13}\text{C}$  NMR (100 MHz,  $\text{CDCl}_3$ ):  $\delta$  191.83, 143.04, 137.67, 136.19, 134.91, 129.54, 128.99, 128.95, 128.22, 127.61, 126.43, 121.73, 119.91, 119.22, 115.96, 107.04, 51.99, 44.56, 28.70, 21.49, 16.81, 8.73; HRMS (EI)  $m/z$   $[\text{M}]^+$  Calcd for  $\text{C}_{24}\text{H}_{25}\text{N}_3\text{O}$  371.1998, found 371.1996.

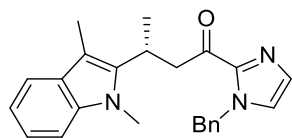

**(R)-1-(1-Benzyl-1H-imidazol-2-yl)-3-(1,3-dimethyl-1H-indol-2-yl)butan-1-one (6k)**

$^1\text{H}$  NMR (400 MHz,  $\text{CDCl}_3$ ):  $\delta$  7.47(d,  $J=7.76$  Hz, 1H), 7.26-7.14(m, 6H), 7.06(t,  $J=7.85$  Hz, 1H), 7.00-6.98(m, 3H), 5.50(q,  $J=14.84$  Hz, 2H), 4.01-3.95(m, 1H), 3.81-3.75(m, 4H), 3.50(dd,  $J=7.28, 16.04$  Hz, 1H), 2.33(s, 3H), 1.42(d,  $J=7.24$  Hz, 3H);  $^{13}\text{C}$  NMR (100 MHz,  $\text{CDCl}_3$ ):  $\delta$  191.56, 142.66, 139.22, 136.57, 136.36, 129.58, 128.94, 128.87, 128.14, 127.64, 126.00, 120.85, 118.60, 118.08, 108.85, 106.36, 51.81, 45.28, 30.38, 27.27, 20.04, 9.51; HRMS (EI)  $m/z$   $[\text{M}]^+$  Calcd for  $\text{C}_{24}\text{H}_{25}\text{N}_3\text{O}$  371.1998, found 371.1996.

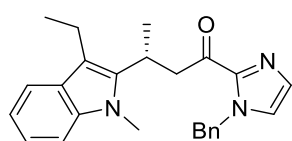

**(R)-1-(1-Benzyl-1H-imidazol-2-yl)-3-(3-ethyl-1-methyl-1H-indol-2-yl)butan-1-one (6l)**

$^1\text{H}$  NMR (400 MHz,  $\text{CDCl}_3$ ):  $\delta$  7.53(d,  $J=7.80$  Hz, 1H), 7.27-7.17(m, 6H), 7.08-7.01(m, 4H), 5.53(q,  $J=14.84$  Hz, 2H), 4.05-3.99(m, 1H),

3.82(s, 3H), 3.73(dd,  $J=7.72$ , 16.04 Hz, 1H), 3.57(dd,  $J=7.56$ , 16.02 Hz, 1H), 2.82(q,  $J=7.52$  Hz, 2H), 1.45(d,  $J=7.28$  Hz, 3H), 1.21(t,  $J=7.48$  Hz, 3H);  $^{13}\text{C}$  NMR (100 MHz,  $\text{CDCl}_3$ ):  $\delta$  191.50, 142.68, 138.76, 136.99, 136.36, 129.62, 128.95, 128.16, 127.85, 127.67, 126.05, 120.88, 118.60, 118.43, 113.60, 108.94, 51.82, 45.57, 30.69, 27.17, 20.64, 18.02, 16.14; HRMS (EI)  $m/z$   $[\text{M}]^+$  Calcd for  $\text{C}_{25}\text{H}_{27}\text{N}_3\text{O}$  385.2154, found 385.2149.

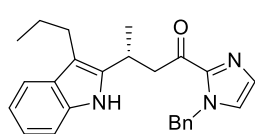

**(R)-1-(1-Benzyl-1H-imidazol-2-yl)-3-(3-propyl-1H-indol-2-yl)butan-1-one (6m)**

$^1\text{H}$  NMR (400 MHz,  $\text{CDCl}_3$ ):  $\delta$  8.45(s, 1H), 7.49 (d,  $J=7.42$  Hz, 1H), 7.26-7.16(m, 5H), 7.08-6.99(m, 5H), 5.55(q, 2H), 3.86-3.80(m, 1H), 3.72-3.66(m, 1H), 3.37-3.31(m, 1H), 2.65(t,  $J=7.16$  Hz, 2H), 1.63-1.57(m, 2H), 1.36(d,  $J=7.04$  Hz, 3H), 0.93(t,  $J=7.32$  Hz, 3H);  $^{13}\text{C}$  NMR (100 MHz,  $\text{CDCl}_3$ ):  $\delta$  191.65, 142.86, 138.08, 136.22, 135.65, 129.55, 128.98, 128.72, 128.21, 127.61, 126.33, 121.01, 118.87, 118.66, 111.70, 110.67, 51.95, 45.21, 28.11, 26.28, 24.28, 21.57, 14.41; HRMS (EI)  $m/z$   $[\text{M}]^+$  Calcd for  $\text{C}_{25}\text{H}_{27}\text{N}_3\text{O}$  385.2154, found 385.2149.

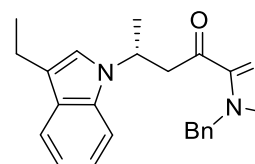

**(R)-1-(1-Benzyl-1H-imidazol-2-yl)-3-(3-ethyl-1H-indol-1-yl)butan-1-one (7a)**

$^1\text{H}$  NMR (400 MHz,  $\text{CDCl}_3$ ):  $\delta$  7.57(d,  $J=7.84$  Hz, 1H), 7.38(d,  $J=8.24$  Hz, 1H), 7.27-7.26(m, 3H), 7.20-7.11(m, 2H), 7.09-7.02(m, 4H), 6.99(s, 1H), 5.43(s, 2H), 5.29-5.24(m, 1H), 3.71(dd,  $J=7.16$ , 15.68 Hz, 1H), 3.60(dd,  $J=7.24$ , 15.64 Hz, 1H), 2.76(q,  $J=7.52$  Hz, 2H), 1.55(d,  $J=6.80$  Hz, 3H), 1.31(t,  $J=7.48$  Hz, 3H);  $^{13}\text{C}$  NMR (100 MHz,  $\text{CDCl}_3$ ):  $\delta$  190.02, 142.57, 136.25, 136.22, 129.77, 128.98, 128.22, 127.93, 127.73, 126.25, 121.45, 120.76, 119.10, 118.71, 118.25, 109.70, 51.78, 47.98, 46.72, 21.42, 18.55, 14.66; HRMS (EI)  $m/z$   $[\text{M}]^+$  Calcd for  $\text{C}_{24}\text{H}_{25}\text{N}_3\text{O}$  371.1998, found 371.1996.

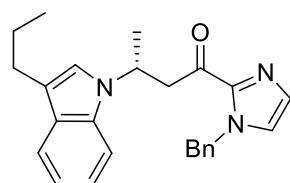

**(R)-1-(1-Benzyl-1H-imidazol-2-yl)-3-(3-propyl-1H-indol-1-yl)butan-1-one (7b)**

$^1\text{H}$  NMR (400 MHz,  $\text{CDCl}_3$ ):  $\delta$  7.54(d,  $J=7.81$  Hz, 1H), 7.36(d,  $J=8.24$  Hz, 1H), 7.26-7.24(m, 3H), 7.17-7.15(m, 2H), 7.06-6.99(m, 5H), 5.42(s, 2H), 5.29-5.24(m, 1H), 3.71(dd,  $J=7.18$ , 15.72 Hz, 1H), 3.59(dd,  $J=7.23$ , 15.66 Hz, 1H), 2.69(t,  $J=7.40$  Hz, 2H), 1.70-1.66(m, 2H), 1.54(d,  $J=6.80$  Hz, 3H), 0.95(t,  $J=7.28$  Hz, 3H);  $^{13}\text{C}$  NMR (100 MHz,  $\text{CDCl}_3$ ):  $\delta$  190.01, 142.56, 138.25, 136.19, 129.76, 128.96, 128.20, 128.14, 127.72, 126.23, 121.44, 121.35, 119.16, 118.67, 116.39, 109.66, 51.78, 47.99, 46.71, 27.51, 23.49, 21.43, 14.30; HRMS (EI)  $m/z$   $[\text{M}]^+$  Calcd for  $\text{C}_{25}\text{H}_{27}\text{N}_3\text{O}$  385.2154, found 385.2149.

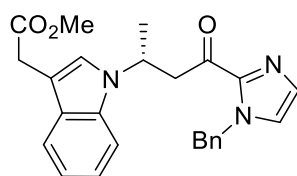

**(R)-Methyl-2-(1-(4-(1-benzyl-1H-imidazol-2-yl)-4-oxo-butan-2-yl)-1H-indol-3-yl) acetate (7c)**

$^1\text{H}$  NMR (400 MHz,  $\text{CDCl}_3$ ):  $\delta$  7.57(d,  $J=8.04$  Hz, 1H), 7.40(d,  $J=8.12$  Hz, 1H), 7.28-7.25(m, 4H), 7.21-7.18(m, 2H), 7.12-7.09(m, 1H), 7.06-7.02(m, 3H), 5.45(s, 2H), 5.29-5.23(m, 1H), 3.75(s, 2H), 3.75-3.59(m, 5H), 1.57(d,  $J=6.80$  Hz, 3H);  $^{13}\text{C}$  NMR (100 MHz,  $\text{CDCl}_3$ ):  $\delta$  189.78, 172.60, 142.47, 136.18, 136.02, 129.79, 128.98, 128.22, 127.81, 127.70, 126.28, 123.37, 121.79, 119.42, 119.12, 109.91, 107.82, 52.02, 51.79, 48.17, 46.75, 31.45, 21.34; HRMS (EI)  $m/z$   $[\text{M}]^+$  Calcd for  $\text{C}_{25}\text{H}_{25}\text{N}_3\text{O}_3$  415.1896, found 415.1885.

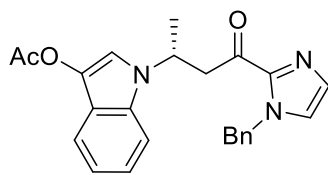

**(R)-1-(4-(1-Benzyl-1H-imidazol-2-yl)-4-oxo-butan-2-yl)-1H-indol-3-yl acetate (7d)**

$^1\text{H}$  NMR (400 MHz,  $\text{CDCl}_3$ ):  $\delta$  7.50(d,  $J=7.88$  Hz, 1H), 7.44(s, 1H), 7.38(d,  $J=8.36$  Hz, 1H), 7.27-7.25(m, 3H), 7.19-7.16(m, 2H), 7.09-7.06(m, 1H), 7.04-7.00(m, 3H), 5.43(s, 2H), 5.30-5.24(m, 1H), 3.68(dd,  $J=7.20, 15.72$  Hz, 1H), 3.58(dd,  $J=7.08, 15.72$  Hz, 1H), 2.33(s, 3H), 1.55(d,  $J=6.8$  Hz, 3H);  $^{13}\text{C}$  NMR (100 MHz,  $\text{CDCl}_3$ ):  $\delta$  189.66, 168.59, 142.43, 136.19, 132.88, 130.24, 129.85, 128.97, 128.22, 127.71, 126.31, 122.36, 120.27, 119.53, 117.68, 113.51, 109.90, 51.78, 48.38, 46.73, 21.27, 21.15; HRMS (EI)  $m/z$   $[\text{M}]^+$  Calcd for  $\text{C}_{24}\text{H}_{23}\text{N}_3\text{O}_3$  401.1739, found 407.1731.

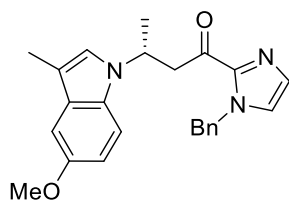

**(R)-1-(1-Benzyl-1H-imidazol-2-yl)-3-(5-methoxy-3-methyl-1H-indol-1-yl)butan-1-one (7e)**

$^1\text{H}$  NMR (400 MHz,  $\text{CDCl}_3$ ):  $\delta$  7.28-7.23(m, 4H), 7.16(d,  $J=0.92$  Hz, 1H), 7.05-7.01(m, 3H), 6.99(d,  $J=0.88$  Hz, 1H), 6.97(d,  $J=2.40$  Hz, 1H), 6.82(dd,  $J=2.44, 8.86$  Hz, 1H), 5.42(d,  $J=2.8$  Hz, 2H), 5.21-5.15(m, 1H), 3.86(s, 3H), 3.66(dd,  $J=7.40, 15.56$  Hz, 1H), 3.56(dd,  $J=6.96, 15.60$  Hz, 1H), 2.27(s, 3H), 1.52(d,  $J=6.80$  Hz, 3H);  $^{13}\text{C}$  NMR (100 MHz,  $\text{CDCl}_3$ ):  $\delta$  189.96, 153.71, 142.52, 136.21, 131.48, 129.75, 128.96, 128.21, 127.74, 126.22, 122.63, 111.59, 110.61, 110.40, 100.89, 56.09, 51.78, 48.18, 46.93, 21.45, 9.94; HRMS (EI)  $m/z$   $[\text{M}]^+$  Calcd for  $\text{C}_{24}\text{H}_{25}\text{N}_3\text{O}_2$  387.1947, found 387.1945.

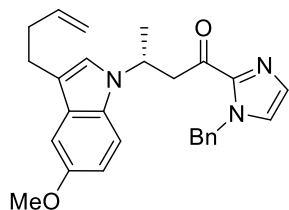

**(R)-1-(1-Benzyl-1H-imidazol-2-yl)-3-(3-(but-3-en-1-yl)-5-methoxy-1H-indol-1-yl)butan-1-one (7f)**

$^1\text{H}$  NMR (400 MHz,  $\text{CDCl}_3$ ):  $\delta$  7.29-7.25(m, 4H), 7.18(d,  $J=0.64$  Hz, 1H), 7.05-7.01(m, 5H), 6.84(dd,  $J=2.44, 8.88$  Hz, 1H), 5.96-5.87(m, 1H), 5.22-5.16(m, 1H), 5.11-4.97(m, 2H), 3.87(s, 3H), 3.71(dd,  $J=7.32, 15.56$  Hz, 1H), 3.56(dd,  $J=7.08, 15.56$  Hz, 1H), 2.79(t,  $J=7.12$  Hz, 2H), 2.45-2.41(m, 2H), 1.54(d,  $J=6.80$  Hz, 3H);  $^{13}\text{C}$  NMR (100 MHz,  $\text{CDCl}_3$ ):  $\delta$  189.96, 153.69, 142.56, 139.02, 136.12, 131.54, 129.75, 128.96, 128.20, 127.71, 126.22, 122.19, 115.18, 114.65, 111.51, 110.45, 101.11, 56.14, 51.79, 48.25, 46.78, 34.40, 29.84, 25.01, 21.40; HRMS (EI)  $m/z$   $[\text{M}]^+$  Calcd for  $\text{C}_{27}\text{H}_{29}\text{N}_3\text{O}_2$  427.2260, found 427.2247.

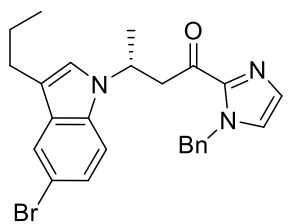

**(R)-1-(1-Benzyl-1H-imidazol-2-yl)-3-(5-bromo-3-propyl-1H-indol-1-yl)butan-1-one (7g)**

$^1\text{H}$  NMR (400 MHz,  $\text{CDCl}_3$ ):  $\delta$  7.65(s, 1H), 7.26-7.23(m, 3H), 7.19(d,  $J=1.04$  Hz, 2H), 7.15(d,  $J=0.80$  Hz, 1H), 7.03(s, 1H), 6.99-6.96(m, 3H), 5.40(s, 2H), 5.22-5.16(m, 1H), 3.70(dd,  $J=7.77, 15.48$  Hz, 1H), 3.52(dd,  $J=6.72, 15.48$  Hz, 1H), 2.62(t,  $J=7.44$  Hz, 2H), 1.70-1.61(m, 2H), 1.53(d,  $J=6.80$  Hz, 3H), 0.93(t,  $J=7.28$  Hz, 3H);  $^{13}\text{C}$  NMR (100 MHz,  $\text{CDCl}_3$ ):  $\delta$  189.67, 142.41, 138.25, 136.06, 134.85, 129.79, 129.74, 128.98, 128.25, 127.67, 126.33, 124.07, 122.59, 121.71, 116.11, 111.98, 111.13, 110.13, 51.81, 48.32, 46.72, 27.30, 23.43, 21.46, 14.21; HRMS (EI)  $m/z$   $[\text{M}]^+$  Calcd for  $\text{C}_{25}\text{H}_{26}\text{N}_3\text{OBr}$  463.1259, found 463.1246.



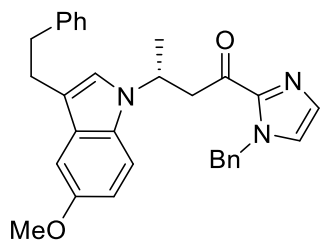

**(R)-1-(1-Benzyl-1H-imidazol-2-yl)-3-(5-methoxy-3-phenethyl-1H-indol-1-yl)butan-1-one (7h)**

$^1\text{H}$  NMR (400 MHz,  $\text{CDCl}_3$ ):  $\delta$  7.30-7.19(m, 10H), 7.06-6.98(m, 5H), 6.87-6.85(m, 1H), 5.45(s, 2H), 5.23-5.18(m, 1H), 3.86(s, 3H), 3.70(dd,  $J=7.32, 15.60$  Hz, 1H), 3.57(dd,  $J=7.04, 15.56$  Hz, 1H), 3.04-2.95(m, 4H), 1.53(d,  $J=6.76$  Hz, 3H);  $^{13}\text{C}$  NMR (100 MHz,  $\text{CDCl}_3$ ):  $\delta$  189.95, 153.75, 142.70, 142.55, 136.22, 131.54, 129.77, 128.98, 128.66, 128.42, 128.22, 128.17, 127.74, 126.26, 125.93, 122.29, 115.19, 111.59, 110.50, 101.01, 56.11, 51.79, 48.24, 46.85, 36.73, 27.66, 21.43; HRMS (EI)  $m/z$   $[\text{M}]^+$  Calcd for  $\text{C}_{31}\text{H}_{31}\text{N}_3\text{O}_2$  477.2416, found 477.2405.

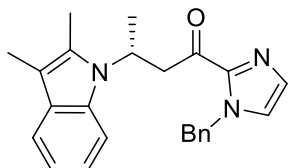

**(R)-1-(1-Benzyl-1H-imidazol-2-yl)-3-(2,3-dimethyl-1H-indol-1-yl)butan-1-one (7i)**

$^1\text{H}$  NMR (400 MHz,  $\text{CDCl}_3$ ):  $\delta$  7.46(b, d,  $J=7.44$  Hz, 2H), 7.29-7.26(m, 3H), 7.14-7.03(m, 5H), 6.97(s, 1H), 5.49-5.27(b, m, 3H), 4.01(b, 1H), 3.76(dd,  $J=6.58, 16.28$  Hz, 1H), 2.42(s, 3H), 2.22(s, 3H), 1.61(d,  $J=7.09$  Hz, 3H);  $^{13}\text{C}$  NMR (100 MHz,  $\text{CDCl}_3$ ):  $\delta$  190.12, 142.45, 136.28, 132.74, 129.73, 128.98, 128.21, 127.94, 127.75, 126.12, 120.40, 119.41, 118.48, 118.12, 111.05, 110.47, 51.75, 47.36, 45.24, 29.87, 20.38, 9.06; HRMS (EI)  $m/z$   $[\text{M}]^+$  Calcd for  $\text{C}_{24}\text{H}_{25}\text{N}_3\text{O}$  371.1998, found 371.1996.

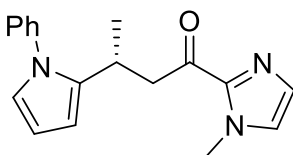

**(R)-1-(1-Methyl-1H-imidazol-2-yl)-3-(1-phenyl-1H-pyrrol-2-yl)butanone (9a)**

$^1\text{H}$  NMR (400 MHz,  $\text{CDCl}_3$ ):  $\delta$  7.44-7.35(m, 5H), 7.11(s, 1H), 6.98(s, 1H), 6.68(d,  $J = 2$  Hz, 1H), 6.18-6.13(m, 2H), 3.93(s, 3H), 3.62-3.47(m, 2H), 3.30-3.24(m, 1H), 1.11(d,  $J = 6.71$  Hz, 3H);  $^{13}\text{C}$  NMR (100 MHz,  $\text{CDCl}_3$ ):  $\delta$  191.64, 143.35, 140.45, 138.47, 129.22, 129.07, 127.38, 126.95, 126.79, 121.90, 108.00, 105.15, 45.89, 36.26, 26.80, 22.11; HRMS (EI)  $m/z$   $[\text{M}]^+$  Calcd for  $\text{C}_{18}\text{H}_{19}\text{N}_3\text{O}$  293.1528, found 293.1526.

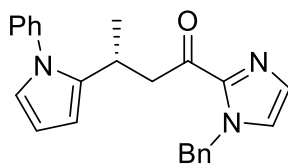

**(R)-1-(1-Benzyl-1H-imidazol-2-yl)-3-(1-phenyl-1H-pyrrol-2-yl)butanone (9b)**

$^1\text{H}$  NMR (400 MHz,  $\text{CDCl}_3$ ):  $\delta$  7.44-7.26(m, 8H), 7.13-7.08(m, 3H), 7.00(s, 1H), 6.68-6.67(m, 1H), 6.18-6.13(m, 2H), 5.57(m, 2H), 3.60-3.50(m, 2H), 3.30-3.21(m, 1H), 1.09(d,  $J = 6.64$  Hz, 3H);  $^{13}\text{C}$  NMR (100 MHz,  $\text{CDCl}_3$ ):  $\delta$  191.83, 142.93, 140.42, 138.36, 136.54, 129.51, 129.21, 128.98, 128.14, 127.68, 127.37, 126.81, 125.88, 121.89, 108.02, 105.26, 51.82, 46.11, 27.02, 22.12; HRMS (EI)  $m/z$   $[\text{M}]^+$  Calcd for  $\text{C}_{24}\text{H}_{23}\text{N}_3\text{O}$  369.1841, found 369.1838.

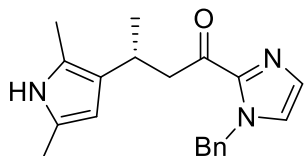

**(R)-1-(1-Benzyl-1H-imidazol-2-yl)-3-(2,5-dimethyl-1H-pyrrol-3-yl)butanone (9c)**

$^1\text{H}$  NMR (400 MHz,  $\text{CDCl}_3$ ):  $\delta$  7.33-7.26(m, 4H), 7.15-7.12(m, 3H), 7.02(s, 1H), 5.74(s, 1H), 5.64-5.54(m, 2H), 3.39-3.26(m, 3H), 2.18(s, 3H), 2.11(s, 3H), 1.18(d,  $J = 6.59$  Hz, 3H);  $^{13}\text{C}$  NMR (100 MHz,  $\text{CDCl}_3$ ):  $\delta$  192.99, 143.16, 136.72, 129.39, 128.91, 128.08, 127.74, 125.69, 125.03, 124.03, 120.98, 104.18, 51.80, 47.95, 27.39, 22.51, 13.15, 11.09; HRMS (EI)  $m/z$   $[\text{M}]^+$  Calcd for  $\text{C}_{20}\text{H}_{23}\text{N}_3\text{O}$  321.1841, found 321.1837.

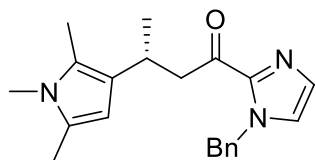

**(R)-1-(1-Benzyl-imidazol-2-yl)-3-(1,2,5-trimethyl-pyrrol-3-yl)butanone (9d)**

$^1\text{H}$  NMR (400 MHz,  $\text{CDCl}_3$ ):  $\delta$  7.34-7.26(m, 3H), 7.17-7.14(m, 3H), 7.03(s, 1H), 5.78(s, 1H), 5.60(m, 2H), 3.44-2.24(m, 6H), 2.17(s, 3H), 2.12(s, 3H), 1.17(d,  $J = 6.57$  Hz, 3H);  $^{13}\text{C}$  NMR (100 MHz,  $\text{CDCl}_3$ ):  $\delta$  193.03, 143.18, 136.72, 129.44, 128.93, 128.11, 127.75, 126.81, 125.74, 123.16, 122.95, 103.09, 51.83, 48.03, 30.18, 27.48, 22.65, 12.62, 10.17; HRMS (EI)  $m/z$   $[\text{M}]^+$  Calcd for  $\text{C}_{21}\text{H}_{25}\text{N}_3\text{O}$  335.1998, found 335.1994.

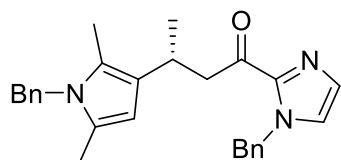

**(R)-1-(1-Benzyl-1H-imidazol-2-yl)-3-(1-benzyl-2,5-dimethyl-1H-pyrrol-3-yl)butan-1-one (9e)**

$^1\text{H}$  NMR (400 MHz,  $\text{CDCl}_3$ ):  $\delta$  7.29-7.23(m, 5H), 7.19-7.13(m, 4H), 7.02(s, 1H), 6.81(d,  $J = 7.17$  Hz, 2H), 5.88(s, 1H), 5.55(q,  $J = 13.45$ , 14.86 Hz, 2H), 4.95(s, 2H), 3.45-3.36(m, 2H), 3.30-3.24(m, 1H), 2.10(s, 3H), 1.99(s, 3H), 1.23(d,  $J = 6.59$  Hz, 3H);  $^{13}\text{C}$  NMR (100 MHz,  $\text{CDCl}_3$ ):  $\delta$  193.01, 143.14, 139.02, 136.64, 129.43, 128.94, 128.78, 128.12, 127.78, 127.02, 126.98, 125.73, 123.63, 122.87, 103.92, 51.81, 48.35, 46.76, 27.85, 22.59, 12.48, 9.98; HRMS (EI)  $m/z$   $[\text{M}]^+$  Calcd for  $\text{C}_{27}\text{H}_{29}\text{N}_3\text{O}$  411.2311, found 411.2309.

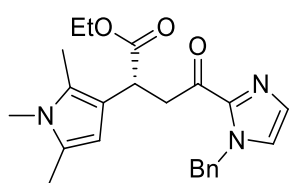

**(R)-Ethyl 4-(1-benzyl-1H-imidazol-2-yl)-4-oxo-2-(1,2,5-trimethyl-1H-pyrrol-3-yl)butanoate (9f)**

$^1\text{H}$  NMR (400 MHz,  $\text{CDCl}_3$ ):  $\delta$  7.31-7.26(m, 3H), 7.17-7.15(m, 3H), 7.02(s, 1H), 5.83(s, 1H), 5.62-5.58(m, 2H), 4.13-4.03(m, 4H), 3.39-3.33(m, 1H), 3.33(s, 3H), 2.19(s, 3H), 2.15(s, 3H), 1.18(t,  $J = 7.08$  Hz, 3H);  $^{13}\text{C}$  NMR (100 MHz,  $\text{CDCl}_3$ ):  $\delta$  191.46, 174.39, 142.53, 136.57, 129.68, 128.95, 128.15, 127.83, 127.24, 125.74, 124.84, 114.68, 104.43, 60.70, 51.75, 42.92, 38.29, 30.33, 14.29, 12.58, 10.37; HRMS (EI)  $m/z$   $[\text{M}]^+$  Calcd for  $\text{C}_{23}\text{H}_{27}\text{N}_3\text{O}_3$  393.2052, found 393.2047.

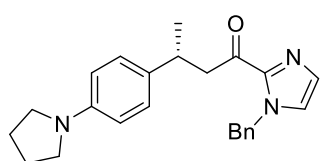

**(R)-1-(1-Benzyl-1H-imidazol-2-yl)-3-(4-(pyrrolidin-1-yl)phenyl)butan-1-one (11a)**

$^1\text{H}$  NMR (400 MHz,  $\text{CDCl}_3$ ):  $\delta$  7.32-7.25(m, 3H), 7.15-7.09(m, 5H), 7.01(s, 1H), 6.49(d,  $J = 8.54$  Hz, 2H), 5.62-5.52(m, 2H), 3.43-3.35(m, 3H), 3.24(t,  $J = 6.54$  Hz, 4H), 2.01-1.94(m, 4H), 1.22(d,  $J = 6.74$  Hz, 3H);  $^{13}\text{C}$  NMR (100 MHz,  $\text{CDCl}_3$ ):  $\delta$  192.59, 146.60, 143.08, 136.61, 133.25, 129.45, 128.94, 128.11, 127.75, 125.83, 111.75, 51.84, 47.80, 47.71, 35.19, 25.60, 22.77; HRMS (EI)  $m/z$   $[\text{M}]^+$  Calcd for  $\text{C}_{24}\text{H}_{27}\text{N}_3\text{O}$  373.2154, found 373.2153.

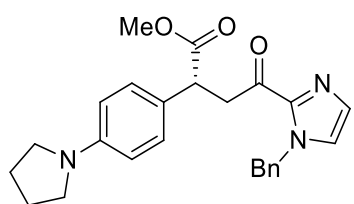

**(R)-Methyl 4-(1-benzyl-1H-imidazol-2-yl)-4-oxo-2-(4-(pyrrolidin-1-yl)phenyl)butanoate (11b)**

$^1\text{H}$  NMR (400 MHz,  $\text{CDCl}_3$ ):  $\delta$  7.34-7.26(m, 3H), 7.19-7.13(m, 5H), 7.01(s, 1H), 6.49(d,  $J = 8.61$  Hz, 2H), 5.67-5.52(m, 2H), 4.14-4.06(m, 2H), 3.63(s, 3H), 3.51-3.43(m, 1H), 3.25(t,  $J = 6.57$  Hz, 4H), 1.99-1.96(m, 4H);  $^{13}\text{C}$  NMR (100 MHz,  $\text{CDCl}_3$ ):  $\delta$  190.95, 174.58, 147.38, 142.42, 136.44, 129.73, 128.98, 128.84, 128.19, 127.82, 125.84, 124.49, 111.87, 52.23, 51.79, 47.72, 45.41, 43.14, 25.61; HRMS (EI)  $m/z$   $[\text{M}]^+$  Calcd for  $\text{C}_{25}\text{H}_{27}\text{N}_3\text{O}_3$  417.2052, found 417.2048.

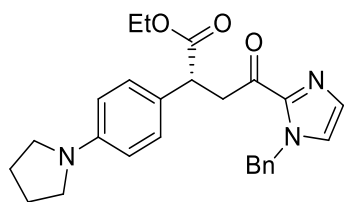

**(R)-Ethyl 4-(1-benzyl-1H-imidazol-2-yl)-4-oxo-2-(4-(pyrrolidin-1-yl) phenyl) butanoate (11c)**

$^1\text{H}$  NMR (400 MHz,  $\text{CDCl}_3$ ):  $\delta$  7.32-7.26(m, 3H), 7.20(d,  $J$  = 8.59 Hz, 2H), 7.15-7.13(m, 3H), 7.01(s, 1H), 6.50(d,  $J$  = 8.60 Hz, 2H), 5.59(q,  $J$  = 14.89 Hz, 2H), 4.15-4.02(m, 4H), 3.51-3.45(m, 1H), 3.25(t,  $J$  = 6.53 Hz, 4H), 1.99-1.96(m, 4H), 1.16(t,  $J$  = 7.11 Hz, 3H);  $^{13}\text{C}$  NMR (100 MHz,  $\text{CDCl}_3$ ):  $\delta$  190.99, 174.04, 147.31, 142.44, 136.50, 129.71, 128.97, 128.85, 128.17, 127.82, 125.86, 124.72, 111.86, 60.87, 51.76, 47.75, 45.63, 43.15, 25.61, 14.24; HRMS (EI)  $m/z$   $[\text{M}]^+$  Calcd for  $\text{C}_{26}\text{H}_{29}\text{N}_3\text{O}_3$  431.2209, found 431.2207.

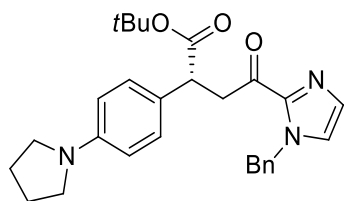

**(R)-tert-Butyl 4-(1-benzyl-1H-imidazol-2-yl)-4-oxo-2-(4-(pyrrolidinyl)phenyl) butanoate (11d)**

$^1\text{H}$  NMR (400 MHz,  $\text{CDCl}_3$ ):  $\delta$  7.31-7.26(m, 3H), 7.19-7.14(m, 5H), 7.02(s, 1H), 6.49(d,  $J$  = 8.54 Hz, 2H), 5.59(d,  $J$  = 4.55 Hz, 2H), 4.10-4.00(m, 2H), 3.37(d,  $J$  = 13.95 Hz, 1H), 3.25(t,  $J$  = 6.41 Hz, 4H), 1.97 (t,  $J$  = 6.41 Hz, 4H), 1.35(s, 9H);  $^{13}\text{C}$  NMR (100 MHz,  $\text{CDCl}_3$ ):  $\delta$  191.16, 173.15, 147.16, 142.48, 136.61, 129.65, 128.95, 128.75, 128.13, 127.78, 125.85, 125.28, 111.81, 80.45, 51.75, 47.74, 46.65, 43.16, 28.05, 25.61; HRMS (EI)  $m/z$   $[\text{M}]^+$  Calcd for  $\text{C}_{28}\text{H}_{33}\text{N}_3\text{O}_3$  459.2522, found 459.2519.

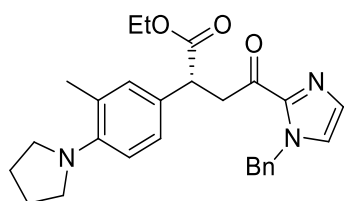

**(R)-Ethyl 4-(1-benzyl-1H-imidazol-2-yl)-2-(3-methyl-4-(pyrrolidin-1-yl)phenyl)-4-oxo-butanoate (11e)**

$^1\text{H}$  NMR (400 MHz,  $\text{CDCl}_3$ ):  $\delta$  7.31-7.26(m, 3H), 7.16-7.14(m, 3H), 7.08-7.06(m, 2H), 7.02(s, 1H), 6.79(d,  $J$  = 8.11 Hz, 1H), 5.59(q,  $J$  = 14.89 Hz, 2H), 4.14-4.02(m, 4H), 3.49-3.41(m, 1H), 3.16(t,  $J$  = 6.33 Hz, 4H), 2.29(s, 3H), 1.92-1.89(m, 4H), 1.17(t,  $J$  = 7.10 Hz, 3H);  $^{13}\text{C}$  NMR (100 MHz,  $\text{CDCl}_3$ ):  $\delta$  190.83, 173.84, 148.79, 142.38, 136.48, 131.25, 129.72, 129.54, 128.97, 128.86, 128.19, 127.80, 125.88, 115.92, 60.93, 51.76, 51.12, 45.65, 43.18, 25.10, 20.77, 14.22; HRMS (EI)  $m/z$   $[\text{M}]^+$  Calcd for  $\text{C}_{27}\text{H}_{31}\text{N}_3\text{O}_3$  445.2365, found 445.2361.

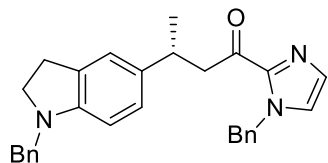

**(R)-1-(1-Benzyl-1H-imidazol-2-yl)-3-(1-benzylindolin-5-yl)butan-1-one (11f)**

$^1\text{H}$  NMR (400 MHz,  $\text{CDCl}_3$ ):  $\delta$  7.37-7.24(m, 8H), 7.15-7.02(m, 5H), 6.92(d,  $J$  = 8.01 Hz, 1H), 6.41(d,  $J$  = 8.02 Hz, 1H), 5.63-5.54(m, 2H), 4.20(s, 2H), 3.43-3.34(m, 3H), 3.26(t,  $J$  = 8.26 Hz, 2H), 2.91(t,  $J$  = 8.21 Hz, 2H), 1.25-1.23(m, 3H);  $^{13}\text{C}$  NMR (100 MHz,  $\text{CDCl}_3$ ):  $\delta$  192.49, 151.16, 143.05, 138.85, 136.59, 136.16, 130.40, 129.46, 128.96, 128.57, 128.13, 128.09, 127.71, 127.17, 125.85, 125.81, 123.39, 107.04, 54.30, 54.11, 51.85, 47.77, 35.45, 28.73, 22.78; HRMS (EI)  $m/z$   $[\text{M}]^+$  Calcd for  $\text{C}_{29}\text{H}_{29}\text{N}_3\text{O}$  435.2311, found 435.2310.

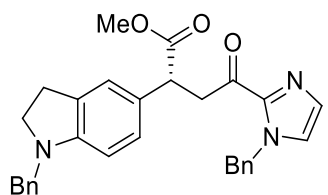

**(R)-Methyl 4-(1-benzylimidazolyl)-2-(1-benzylindolinyl)-4-oxo-butanoate (11g)**

$^1\text{H}$  NMR (400 MHz,  $\text{CDCl}_3$ ):  $\delta$  7.36-7.26 (m, 8H), 7.16-7.14 (m, 3H), 7.09 (s, 1H), 7.02-7.00 (m, 2H), 6.43 (d,  $J$  = 8.05 Hz, 1H), 5.60 (q,  $J$  = 46.88, 14.91 Hz, 2H), 4.23 (s, 2H), 4.16-4.07 (m, 2H), 3.65 (s, 3H), 3.51-3.43 (m, 1H), 3.31 (t,  $J$  = 8.35 Hz, 2H), 2.94 (t,  $J$  = 8.26 Hz, 2H);

$^{13}\text{C}$  NMR (100 MHz,  $\text{CDCl}_3$ ):  $\delta$  190.85, 174.56, 152.14, 142.37, 138.54, 136.44, 130.77, 129.76, 129.01, 128.64, 128.22, 128.04, 127.82, 127.28, 127.24, 127.14, 125.91, 124.19, 106.98, 53.81, 53.76, 52.31, 51.79, 45.66, 43.39, 28.57; HRMS (EI)  $m/z$   $[\text{M}]^+$  Calcd for  $\text{C}_{30}\text{H}_{29}\text{N}_3\text{O}_3$  479.2209, found 479.2209.

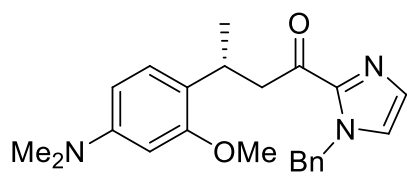

**(R)-1-(1-Benzylimidazolyl)-3-(4-(dimethylamino)-2-methoxyphenyl)butanone (11h)**

$^1\text{H}$  NMR (400 MHz,  $\text{CDCl}_3$ ):  $\delta$  7.32-7.26(m, 3H), 7.15-7.08(m, 4H), 7.01(s, 1H), 6.29-6.25(m, 2H), 5.59(s, 2H), 3.79-3.73(m, 4H), 3.49-3.35(m, 2H), 2.92(s, 6H), 1.22(d,  $J = 6.90$  Hz, 3H);

$^{13}\text{C}$  NMR (100 MHz,  $\text{CDCl}_3$ ):  $\delta$  192.91, 157.81, 150.49, 143.22, 136.70, 129.38, 128.93, 128.09, 127.79, 127.63, 125.70, 123.13, 105.02, 96.85, 55.43, 51.81, 46.16, 41.04, 28.90, 21.10; HRMS (EI)  $m/z$   $[\text{M}]^+$  Calcd for  $\text{C}_{23}\text{H}_{27}\text{N}_3\text{O}_2$  377.2103, found 377.2101.

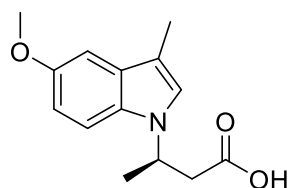

**(R)-3-(5-Methoxy-3-methyl-1H-indol-1-yl)butanoic acid (12)<sup>5</sup>**

To a solution of **7e** (0.3 mmol) in 2ml of dry DMF was added methyl iodide (10 equiv) under argon at rt. After 20h stirring at 60 °C, the resulting yellow mixture was concentrated in vacuo to remove excess methyl iodide. Then water (5d) and DBU (5 equiv) were added at rt respectively. After 4h of stirring at rt, the reaction was quenched with  $\text{NH}_4\text{Cl}$  aq and purified by silica gel flash chromatography (EA/Hexane = 1:2-2:1) to afford the product as white oil, 81% yield.  $^1\text{H}$  NMR (400 MHz,  $\text{CDCl}_3$ ):  $\delta$  7.28(d,  $J=8.88$  Hz, 1H), 7.02(d,  $J=2.39$  Hz, 1H), 6.95(s, 1H), 6.90(dd,  $J=2.44, 8.88$  Hz, 1H), 4.94-4.88(m, 1H), 3.90(s, 3H), 2.96-2.74(m, 2H), 2.32(s, 3H), 1.57(d,  $J=6.80$ Hz, 3H);  $^{13}\text{C}$  NMR (100 MHz,  $\text{CDCl}_3$ ):  $\delta$  176.73, 153.88, 131.30, 129.19, 122.24, 111.90, 110.97, 110.25, 101.14, 56.13, 48.10, 41.75, 20.90, 9.90; HRMS (EI)  $m/z$   $[\text{M}]^+$  Calcd for  $\text{C}_{14}\text{H}_{17}\text{NO}_3$  247.1208, found 247.1205.

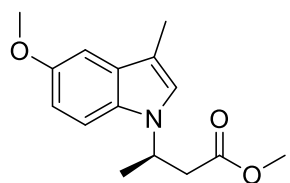

**(R)-Methyl 3-(5-methoxy-3-methyl-1H-indol-1-yl)butanoate (13)<sup>5</sup>**

To a solution of **7e** (0.3 mmol) in 2ml of dry DMF was added methyl iodide (10 equiv) under argon at rt. After 20h stirring at 60 °C, the resulting yellow mixture was concentrated in vacuo to remove excess methyl iodide and DMF. Then anhydrous methanol in 2 ml of dry DCM and DBU (5 equiv) were added at rt respectively. After 6h of stirring at rt, the reaction was quenched with  $\text{NH}_4\text{Cl}$  aq and purified by silica gel flash chromatography (EA/Hexane = 1:10) to afford the product as white oil, 95% yield.  $^1\text{H}$  NMR (400 MHz,  $\text{CDCl}_3$ ):  $\delta$  7.30-7.27(m, 1H), 7.01(d,  $J=2.40$  Hz, 1H), 6.95(s, 1H), 6.91-6.88(m, 1H), 4.95-4.90(m, 1H), 3.90(s, 3H), 3.63(s, 3H), 2.91-2.71(m, 2H), 2.31(s, 3H), 1.57(d,  $J=6.82$  Hz, 3H);  $^{13}\text{C}$  NMR (100 MHz,  $\text{CDCl}_3$ ):  $\delta$  171.47, 153.84, 131.28, 129.10, 122.26, 111.80, 110.80, 110.24, 101.01, 56.09, 51.98, 48.35, 41.92, 20.93, 9.92; HRMS (EI)  $m/z$   $[\text{M}]^+$  Calcd for  $\text{C}_{15}\text{H}_{19}\text{NO}_3$  261.1365, found 261.1365.

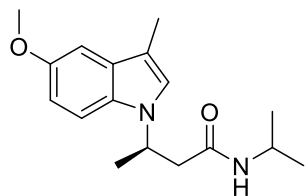

**(R)-N-Isopropyl-3-(5-methoxy-3-methyl-1H-indol-1-yl)butanamide (14)<sup>5</sup>**

To a solution of **7e** (0.3 mmol) in 2ml of dry DMF was added methyl iodide (10 equiv) under argon at rt. After 20h stirring at 60 °C, the resulting yellow mixture was concentrated in vacuo to remove excess methyl iodide. Then isopropylamine (10 eq) and DBU (5 equiv) were

added at rt respectively. After 12h of stirring at rt, the reaction was quenched with NH<sub>4</sub>Cl aq and purified by silica gel flash chromatography (EA/Hexane = 1:2-1:1) to afford the product as yellow solid, 88% yield. <sup>1</sup>H NMR (400 MHz, CDCl<sub>3</sub>): δ 7.29(d, *J*=8.90 Hz, 1H), 6.98(d, *J*=2.41 Hz, 1H), 6.92(s, 1H), 6.87(dd, *J*=2.44, 8.88 Hz, 1H), 4.91-4.86(m, 1H), 3.87(s, 3H), 3.87-3.79(m, 1H), 2.62-2.49(m, 2H), 2.29(s, 3H), 1.59(d, *J*=6.88 Hz, 3H), 0.96(d, *J*=6.56 Hz, 3H), 0.68(d, *J*=6.55 Hz, 3H); <sup>13</sup>C NMR (100 MHz, CDCl<sub>3</sub>): δ 169.24, 153.86, 131.37, 129.06, 122.39, 111.90, 110.77, 110.56, 101.11, 56.13, 49.38, 44.98, 41.40, 22.63, 22.09, 21.03, 9.88; HRMS (EI) *m/z* [M]<sup>+</sup> Calcd for C<sub>17</sub>H<sub>24</sub>N<sub>2</sub>O<sub>2</sub> 288.1838, found 288.1831.

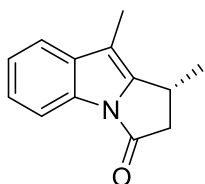

### (*R*)-1,9-Dimethyl-1,2-dihydropyrrolo[1,2-*a*]indol-3-one (**15**)<sup>5</sup>

To a solution of **6b** (0.3 mmol) in 2ml of dry DMF was added methyl iodide (10 equiv) under argon at rt. After 20h stirring at 60 °C, the resulting yellow mixture was concentrated in vacuo to remove excess methyl iodide. Then DBU (5 equiv) was added at rt. After 12h of stirring at rt, the reaction was quenched with NH<sub>4</sub>Cl aq and purified by silica gel flash chromatography (EA/Hexane = 1:20) to afford the product as yellow solid, 75% yield. <sup>1</sup>H NMR (400 MHz, CDCl<sub>3</sub>): δ 8.05-8.03(m, 1H), 7.47-7.44(m, 1H), 7.31-7.27(m, 2H), 3.55-3.51(m, 1H), 3.31(dd, *J*=8.68, 18.14 Hz, 1H), 2.65(dd, *J*=3.82, 18.12 Hz, 1H), 2.26(s, 3H), 1.47(d, *J*=7.06 Hz, 3H); <sup>13</sup>C NMR (100 MHz, CDCl<sub>3</sub>): δ 170.89, 143.73, 136.45, 130.02, 123.85, 123.51, 118.68, 113.78, 108.66, 44.08, 27.08, 20.27, 8.37; HRMS (EI) *m/z* [M]<sup>+</sup> Calcd for C<sub>13</sub>H<sub>13</sub>NO 199.0997, found 199.0996.

## Computational details

All the calculations were performed by Gaussian 09 packages.<sup>6</sup> Molecular structures of all intermediates and transition states were optimized by the M06L functional.<sup>7</sup> The vibrational frequency calculations at the same level were carried out to verify that every optimized structure is an energy minima (no imaginary frequency) or a transition state, and to evaluate its zero-point vibration energy (ZPVE). The 6-31G\* Pople basis set<sup>8</sup> was employed for all the atoms except for Fe atom with effective core potential (ECP) type basis set LANL2DZ.<sup>9</sup> The solvent effect was included by the single point calculations for all the optimized gas-phase structures with self-consistent reactions field (SCRF) based on the polarizable continuum model (PCM)<sup>10</sup> in which acetonitrile was the solvent as the experimental condition. The functional of M06<sup>11</sup> was applied in the single point calculations to compute energy; 6-311+G\* basis set<sup>12</sup> was applied on all the atoms except for Fe atom with the Hay-Wadt relativistic effective core potentials (RECPs) LANL2TZ(f).<sup>13</sup> Simulation results showed that quintet is the ground state for all the complexes.

## References

- 1 K. S. Hagen, *Inorg. Chem.*, 2000, **39**, 5867.
- 2 J.-L. Lim, S. Chirayil and R. P. Thummel, *J. Org. Chem.*, 1991, **56**, 1492.
- 3 A.-H. Li, D. J. Beard, H. Coate, A. Honda, M. Kadalbajoo, A. Kleinberg, R. Laufer, K. M. Mulvihill, A. Nigro, P. Rastogi, D. Sherman, K. W. Siu, A. G. Steinig, T. Wang, D. Werner, A. P. Crew and M. J. Mulvihill, *Synthesis*, 2010, **10**, 1678.
- 4 (a) A. Maisoniai, M. Traikia, A. Gautier and D. J. Aitken, *Tetrahedron Lett.*, 2006, **47**, 8091; (b) M. E. Fox, A. Gerlach, I. C. Lennon, G. Meek and C. Praquin, *Synthesis*, 2005, **19**, 3196; (c) C. Zang, Y. Liu, Z.-J. Xu, C.-W. Tse, X. Guan, J. Wei, J.-S. Huang and C.-M. Che, *Angew. Chem., Int. Ed.*, 2016, **55**, 10253.
- 5 D. A. Evans, K. R. Fandrick, H.-J. Song, K. A. Scheidt and R. Xu, *J. Am. Chem. Soc.*, **2007**, *129*, 10029.
- 6 R. D. Gaussian 09, M. J. Frisch, G. W. Trucks, H. B. Schlegel, G. E. Scuseria, M. A. Robb, J. R. Cheeseman, G. Scalmani, V. Barone, B. Mennucci, G. A. Petersson, H. Nakatsuji, M. Caricato, X. Li, H. P. Hratchian, A. F. Izmaylov, J. Bloino, G. Zheng, J. L. Sonnenberg, M. Hada, M. Ehara, K. Toyota, R. Fukuda, J. Hasegawa, M. Ishida, T. Nakajima, Y. Honda, O. Kitao, H. Nakai, T. Vreven, J. A. Montgomery, Jr., J. E. Peralta, F. Ogliaro, M. Bearpark, J. J. Heyd, E. Brothers, K. N. Kudin, V. N. Staroverov, R. Kobayashi, J. Normand, K. Raghavachari, A. Rendell, J. C. Burant, S. S. Iyengar, J. Tomasi, M. Cossi, N. Rega, J. M. Millam, M. Klene, J. E. Knox, J. B. Cross, V. Bakken, C. Adamo, J. Jaramillo, R. Gomperts, R. E. Stratmann, O. Yazyev, A. J. Austin, R. Cammi, C. Pomelli, J. W. Ochterski, R. L. Martin, K. Morokuma, V. G. Zakrzewski, G. A. Voth, P. Salvador, J. J. Dannenberg, S. Dapprich, A. D. Daniels, Ö. Farkas, J. B. Foresman, J. V. Ortiz, J. Cioslowski, and D. J. Fox, Gaussian, Inc., Wallingford CT, 2009.
- 7 Y. Zhao and D. G. Truhlar, *J. Chem. Phys.*, 2006, **125**, 194101.
- 8 (a) P. C. Hariharan and J. A. Pople, *Theor. Chim. Acta*, 1973, **28**, 213; (b) M. M. Francl, W. J. Pietro, W. J. Hehre, J. S. Binkley, M. S. Gordon, D. J. DeFrees and J. A. Pople, *J. Chem. Phys.*, 1982, **77**, 3654.
- 9 P. J. Hay and W. R. Wadt, *J. Chem. Phys.*, 1985, **82**, 299.
- 10 (a) S. Miertuš, E. Scrocco and J. Tomasi, *Chem. Phys.*, 1981, **55**, 117; (b) J. Tomasi, B. Mennucci and R. Cammi, *Chem. Rev.*, 2005, **105**, 2999.
- 11 Y. Zhao and D. Truhlar, *Theor. Chem. Acc.*, 2008, **120**, 215.
- 12 (a) R. Krishnan, J. S. Binkley, R. Seeger and J. A. Pople, *J. Chem. Phys.*, 1980, **72**, 650; (b) T. Clark, J. Chandrasekhar, G. W. Spitznagel and P. V. R. Schleyer, *J. Comput. Chem.*, 1983, **4**, 294.
- 13 L. E. Roy, P. J. Hay and R. L. Martin, *J. Chem. Theory Comput.*, 2008, **4**, 1029.

# NMR spectra of compounds

## 8-Bromo-4-chloro-2-methylquinoline (S-Qd)

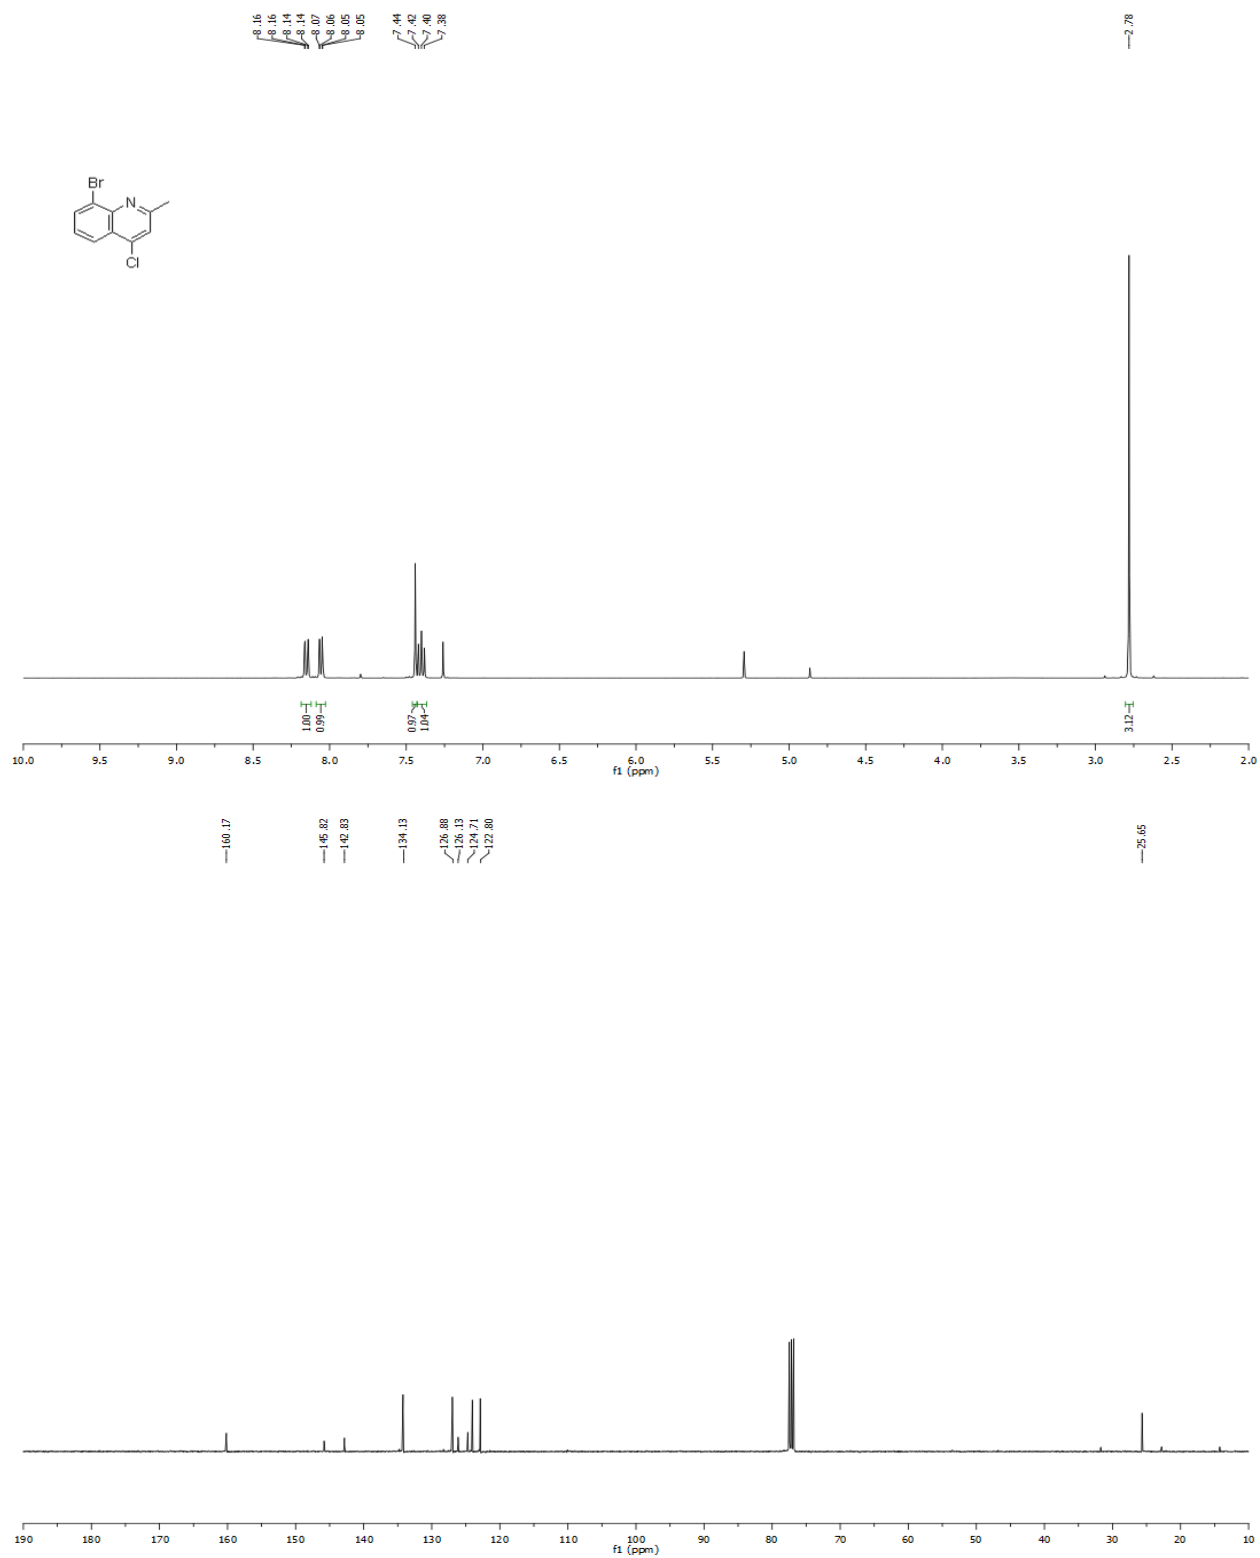

# 5-Bromo-2,3-dihydro-1H-cyclopenta[b]quinoline (S-Qe)

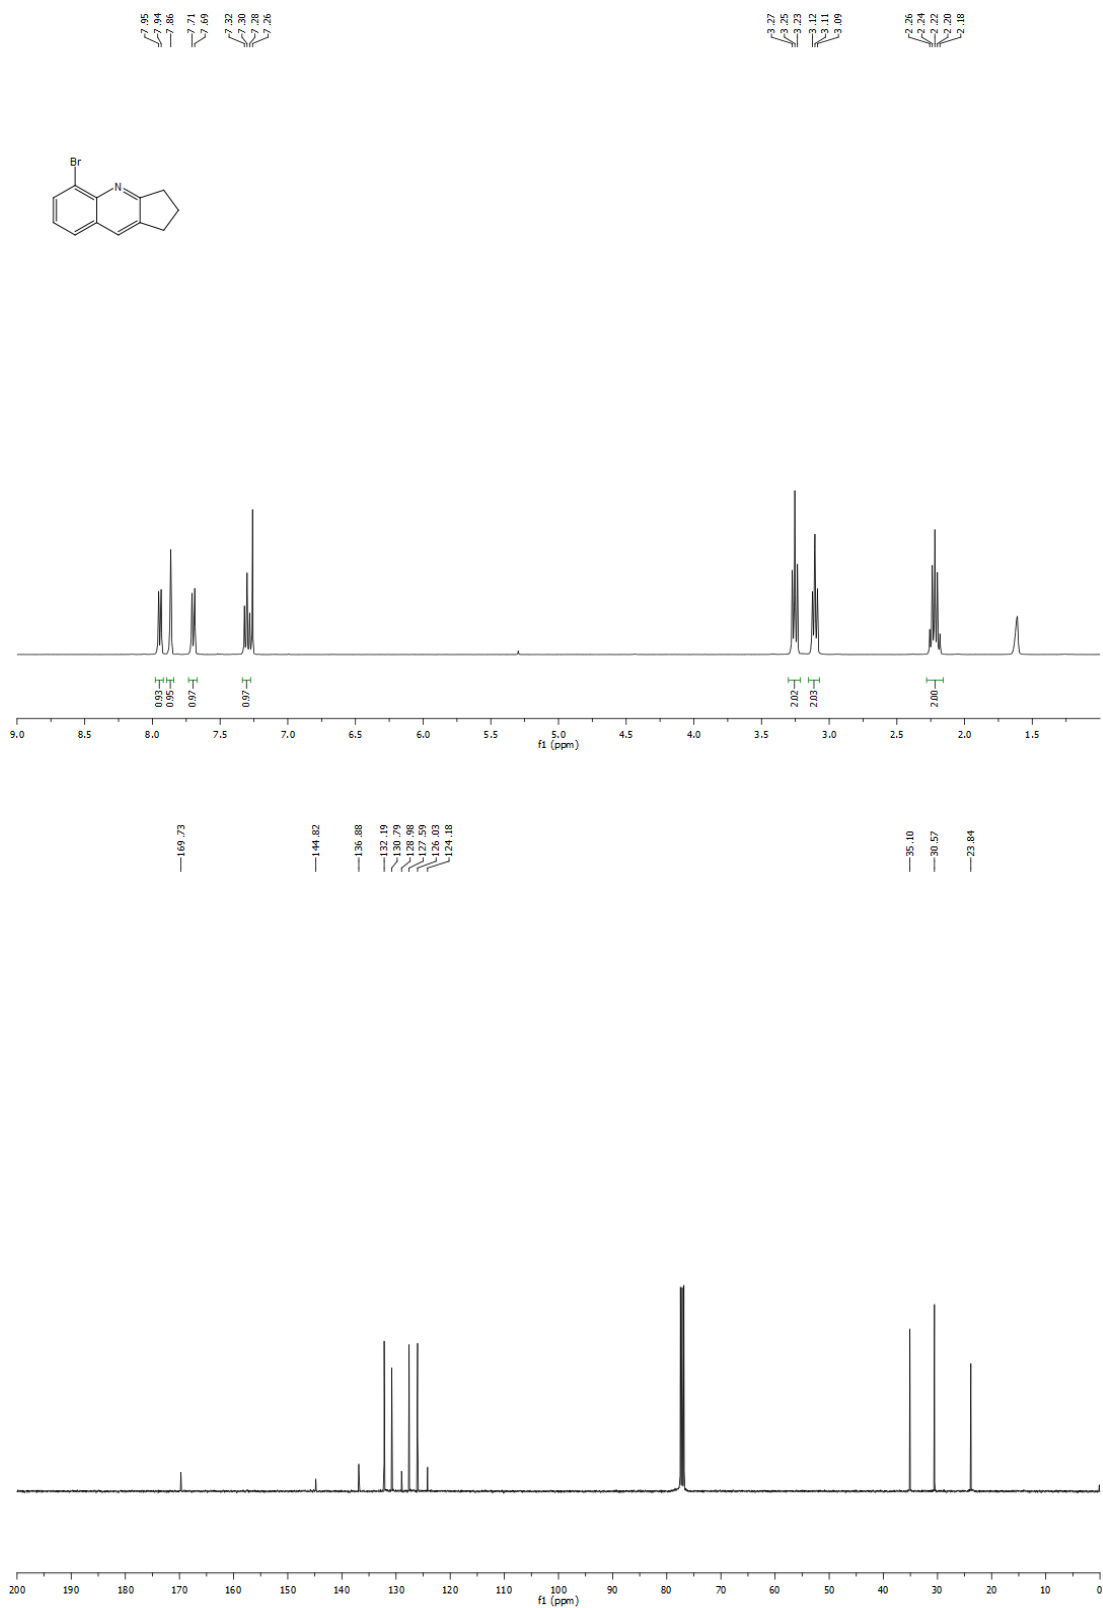



# 5-Bromo-1,2,3,4-tetrahydroacridine (S-Qf)

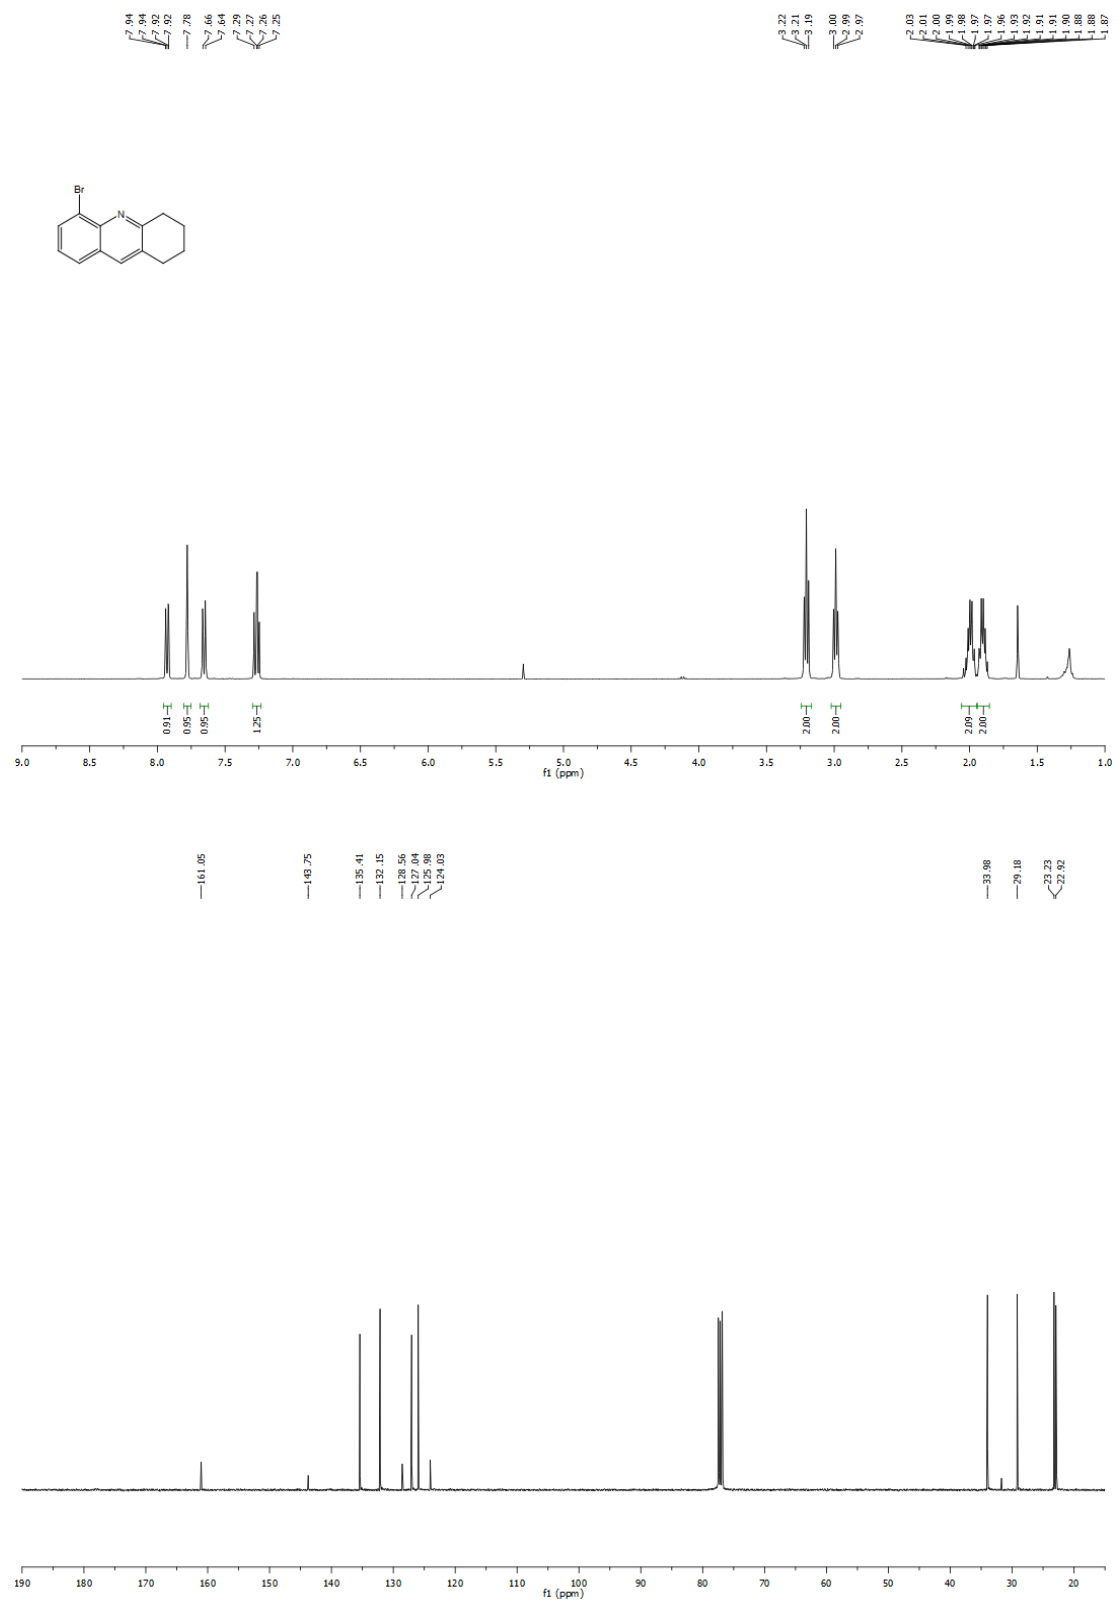

(*R,R*)-*N,N*-Bis(4-chloro-2-methylquinolin-8-yl)cyclohexane-1,2-diamine (**2d-H<sub>2</sub>**)

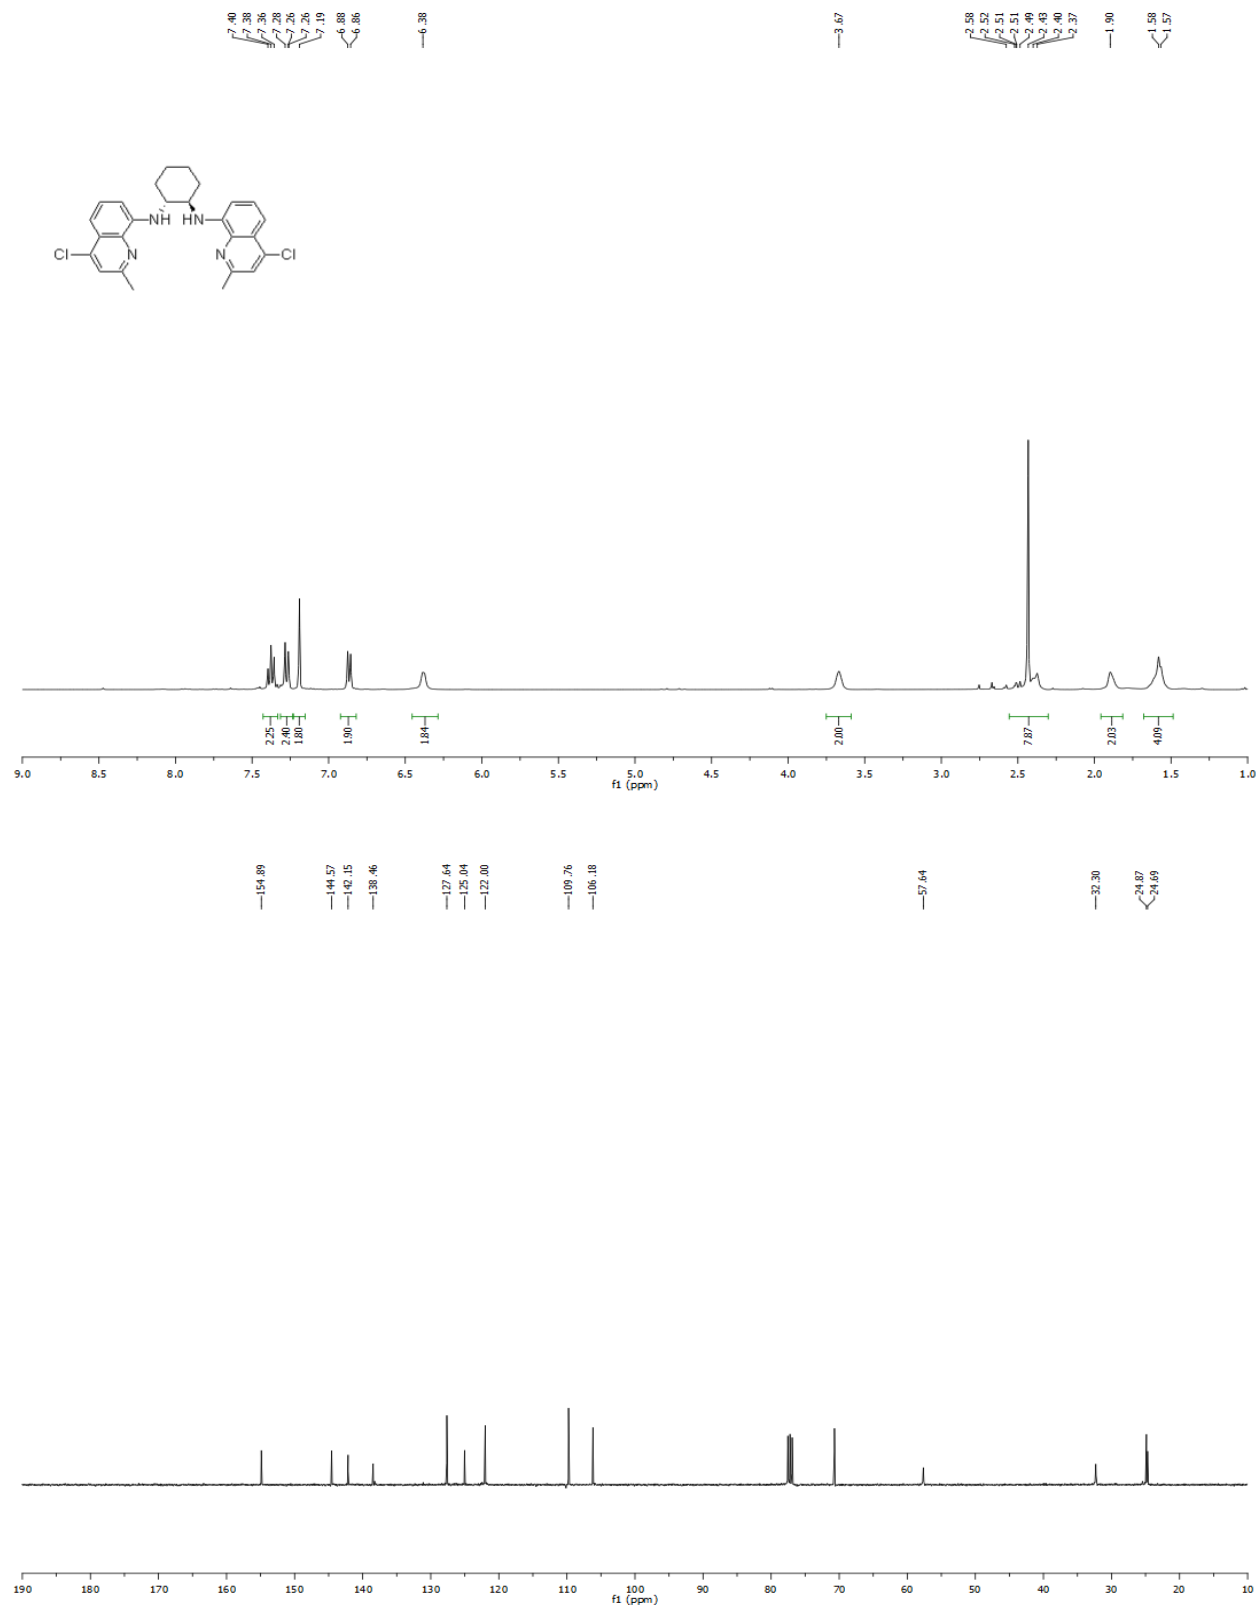

(*R,R*)-*N,N'*-Bis(2,3-dihydro-1*H*-cyclopenta[*b*]quinolin-5-yl)cyclohexane-1,2-diamine (**2e-H<sub>2</sub>**)

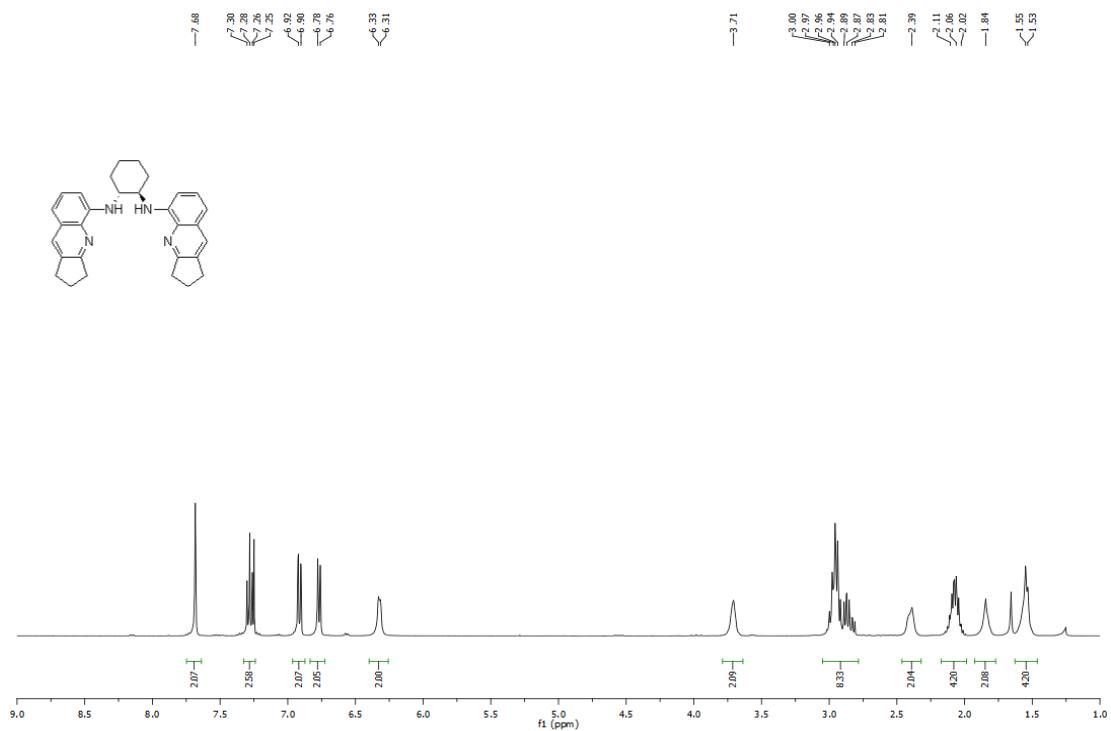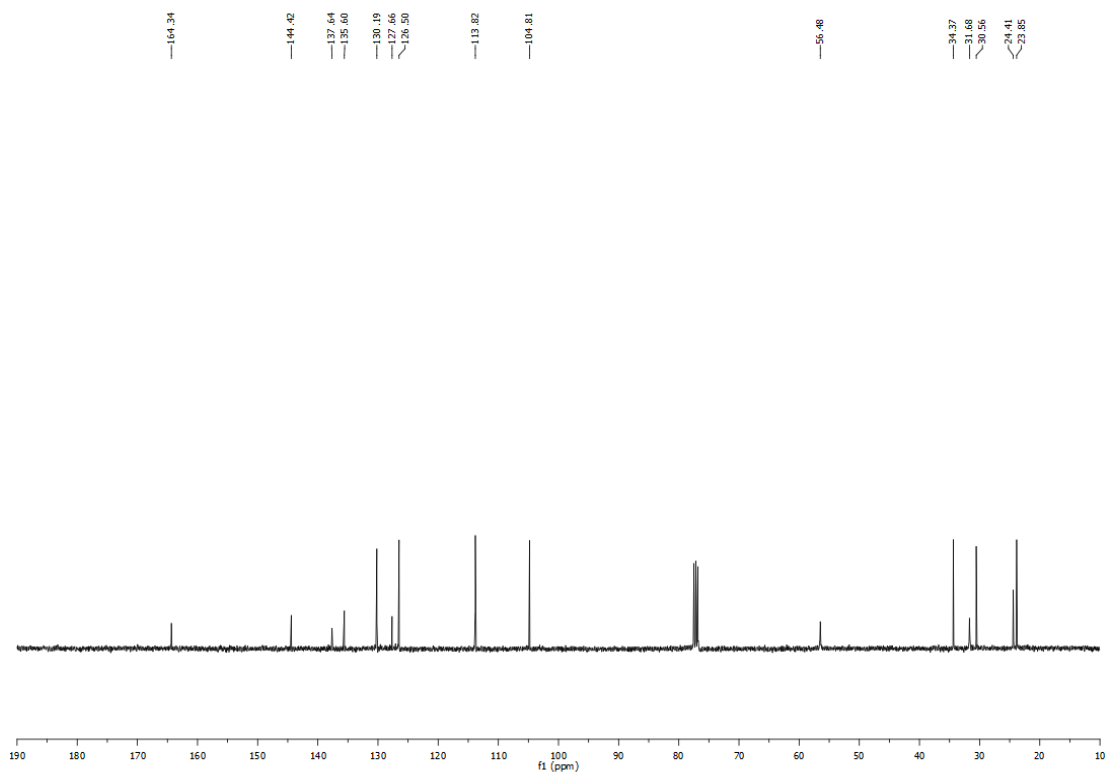

(*R,R*)-*N,N'*-Bis(5,6,7,8-tetrahydroacridin-4-yl)cyclohexane-1,2-diamine (**2f-H<sub>2</sub>**)

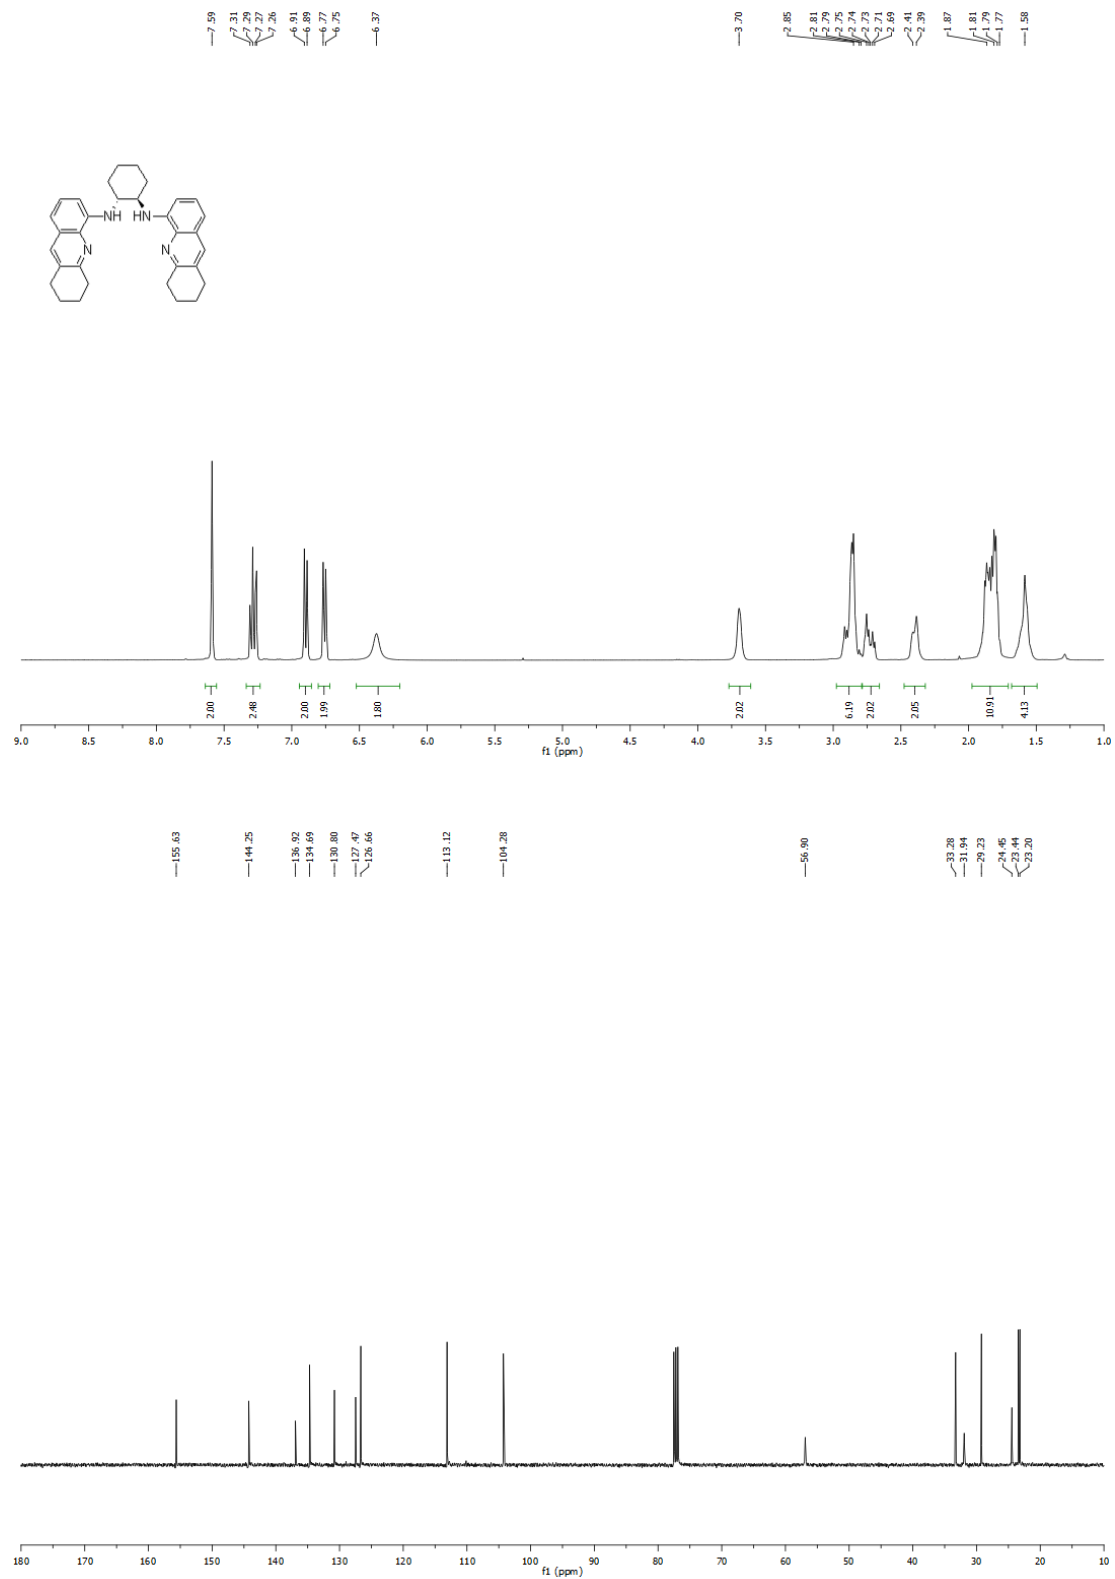

(*R,R*)-*N,N*-Bis(4-chloro-2-methylquinolin-8-yl)-*N,N*-dimethylcyclohexane-1,2-diamine (**2d**)

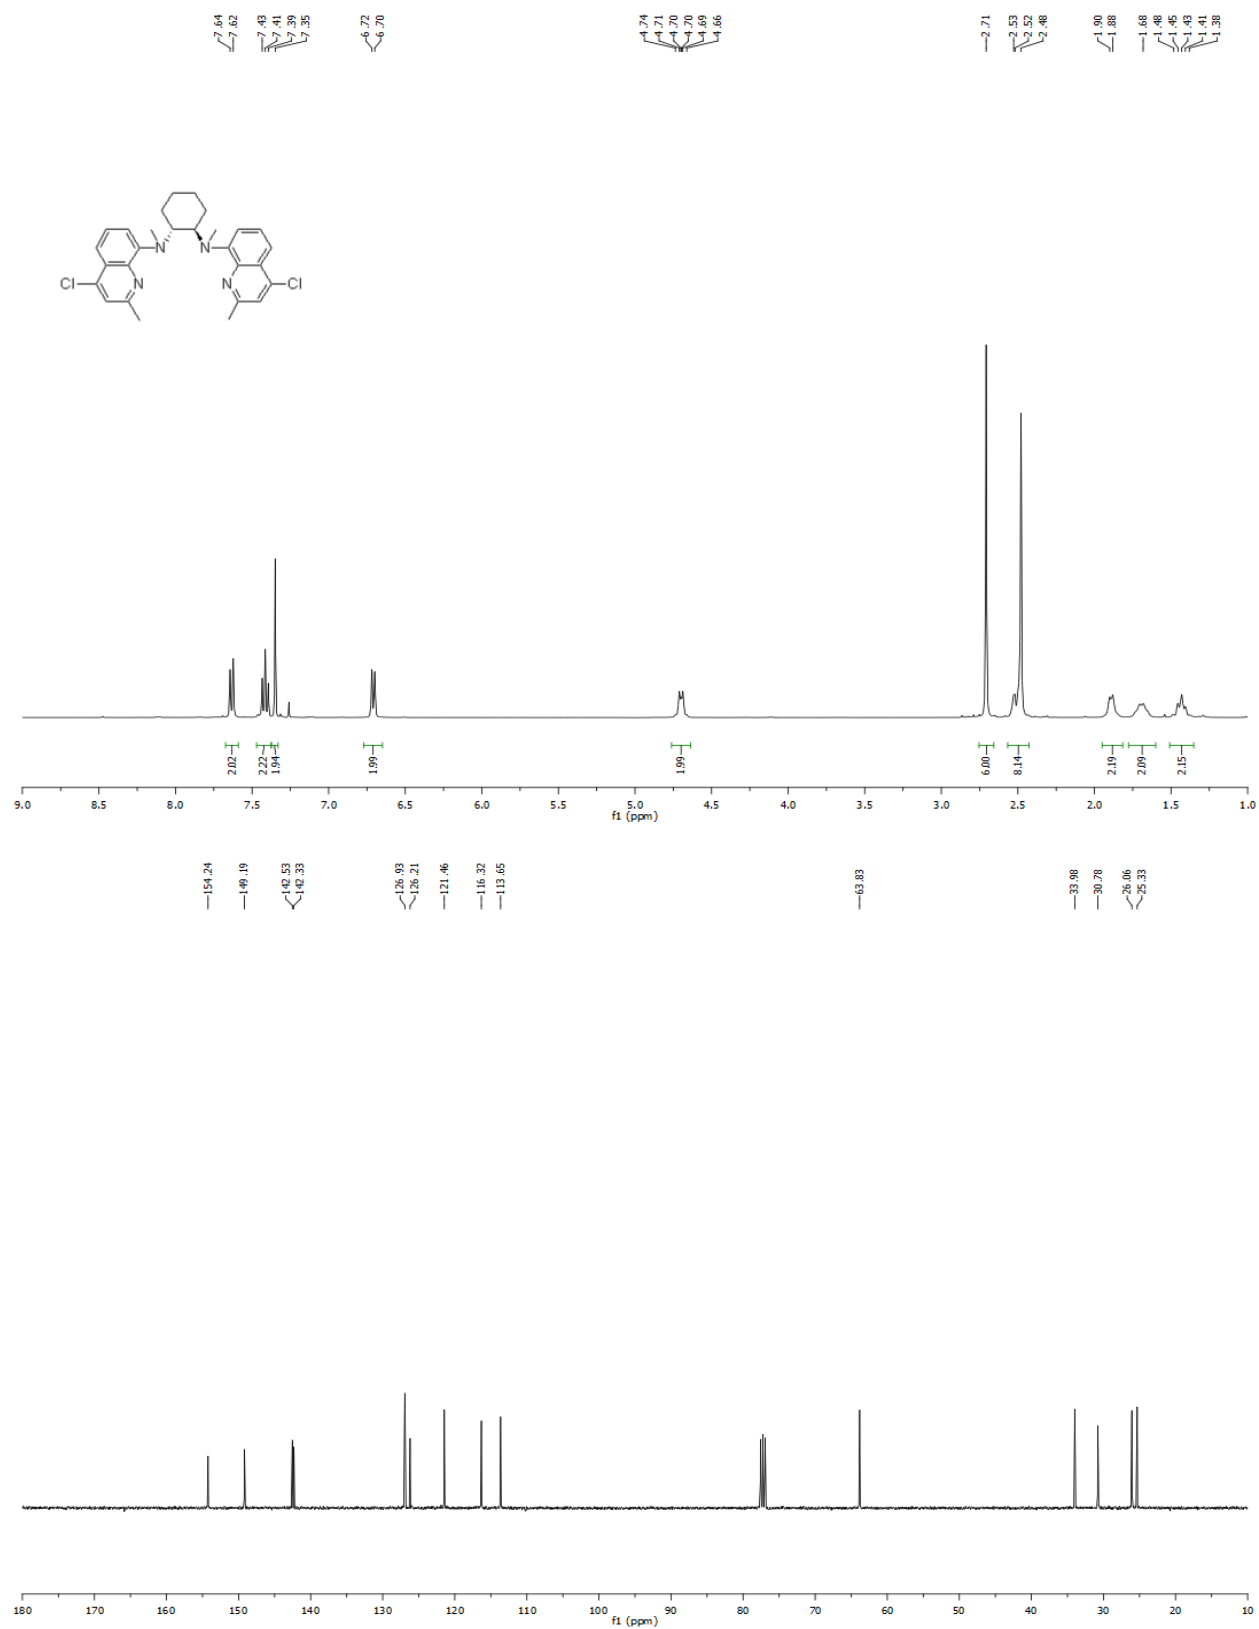

*(R,R)*-*N,N'*-Bis(2,3-dihydro-1*H*-cyclopenta[*b*]quinolin-5-yl)-*N,N'*-dimethylcyclo-hexane-1,2-diamine (**2e**)

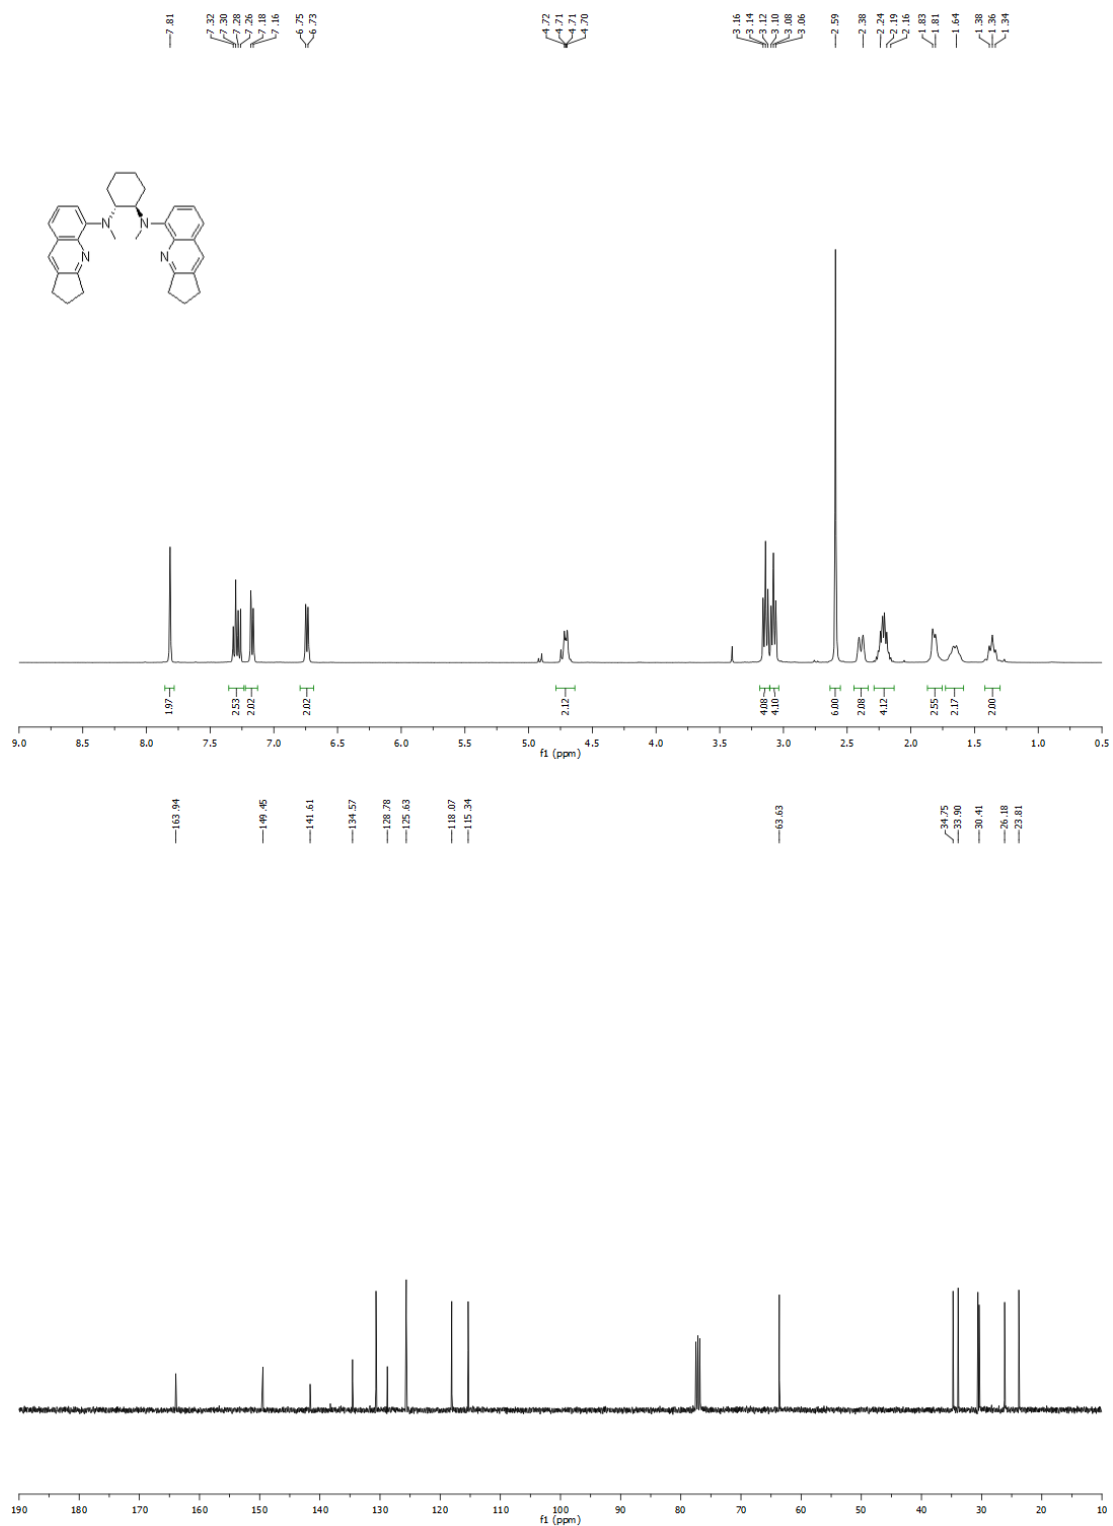

(*R,R*)-*N,N'*-Dimethyl-*N,N'*-bis(5,6,7,8-tetrahydroacridin-4-yl)cyclohexane-1,2-diamine (**2f**)

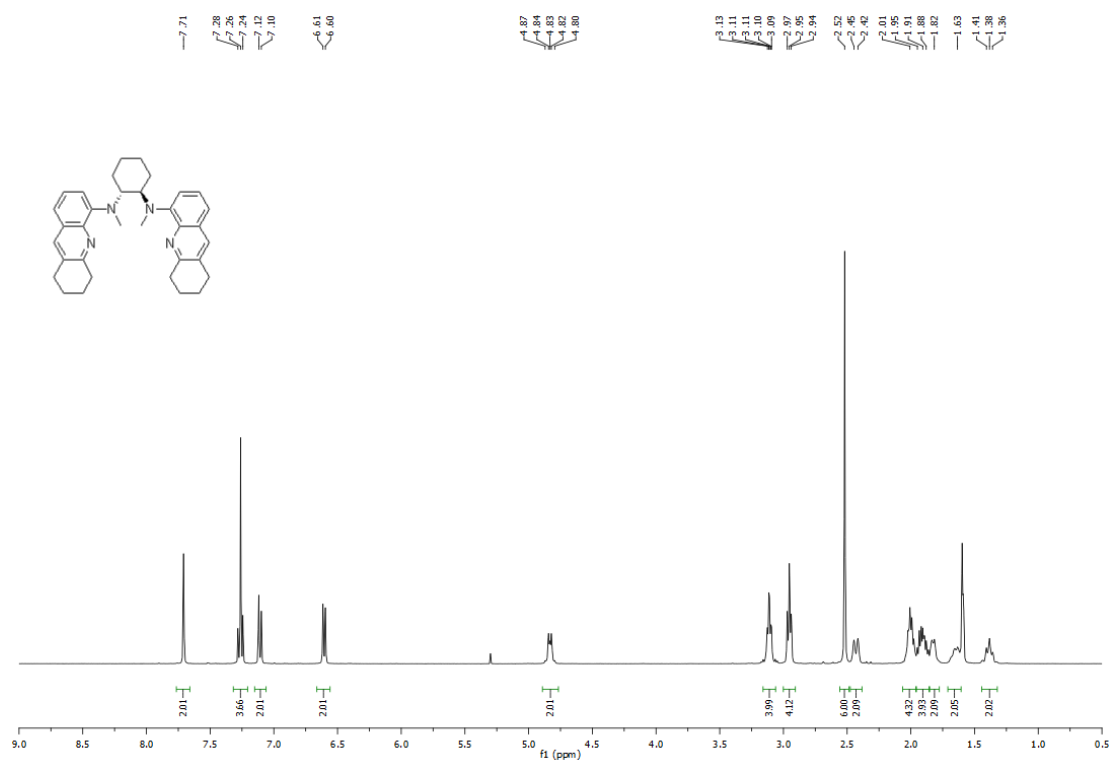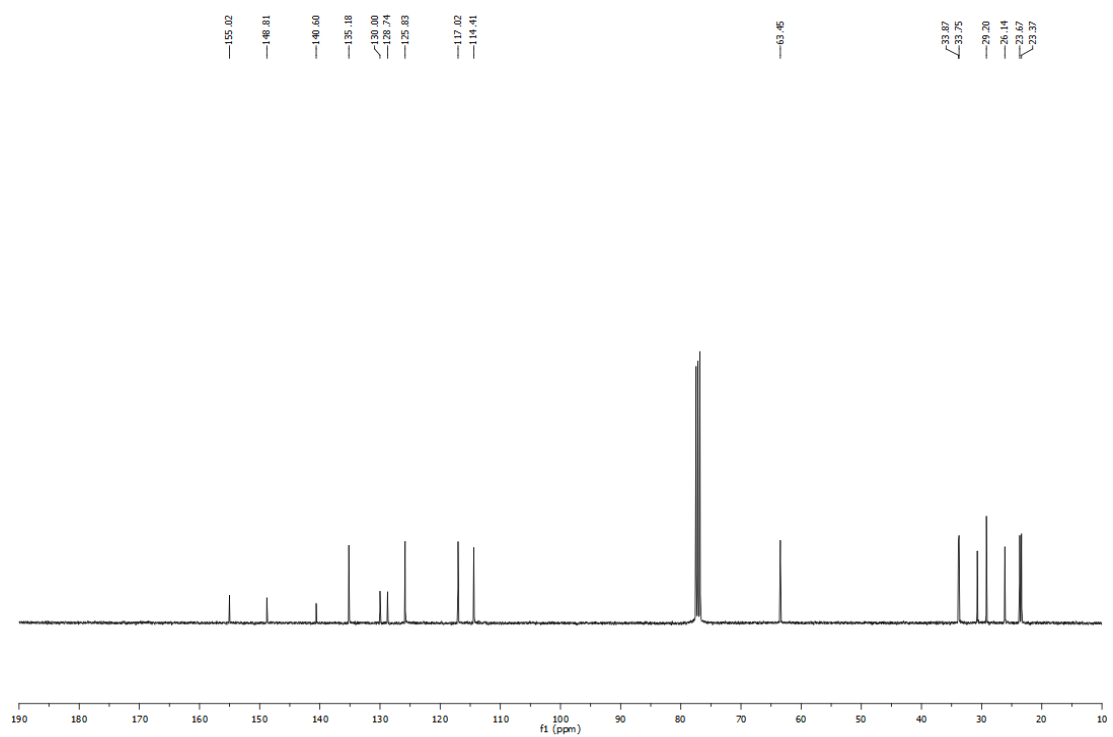

(*R*)-3-(1-Benzyl-1*H*-indol-3-yl)-1-(1-methyl-1*H*-imidazol-2-yl)butan-1-one (**5b**)

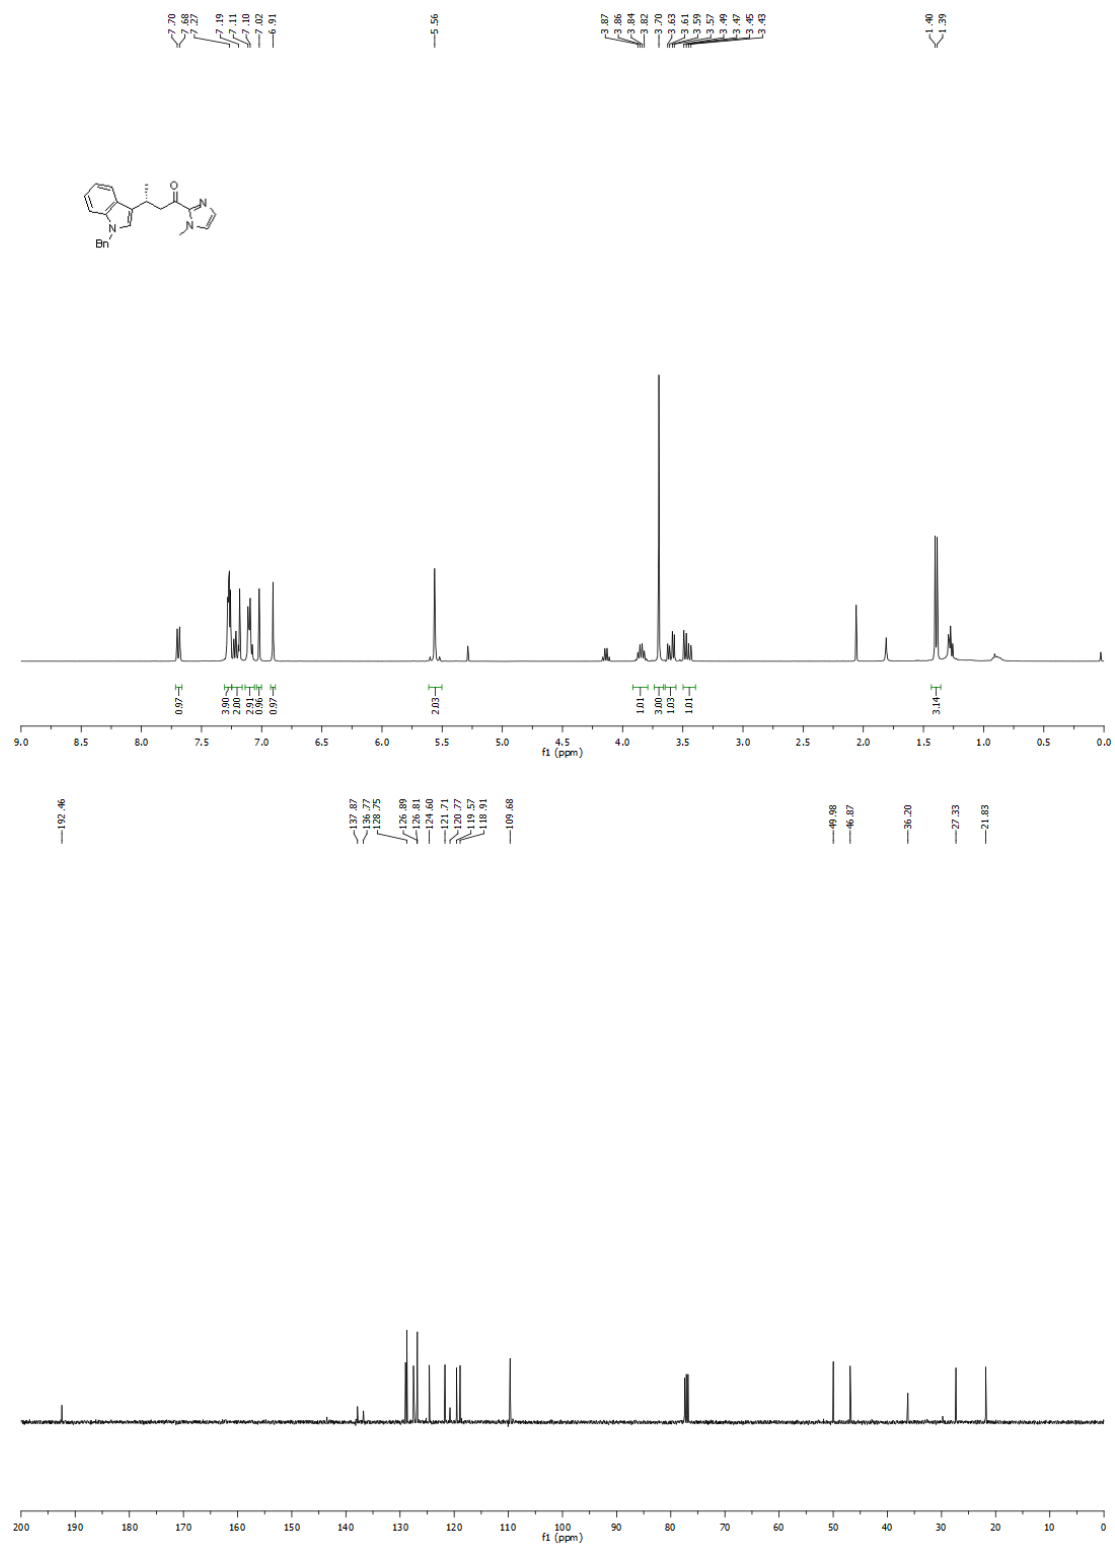



(R)-3-(1-Allyl-1H-indol-3-yl)-1-(1-methyl-1H-imidazol-2-yl)butan-1-one (5c)

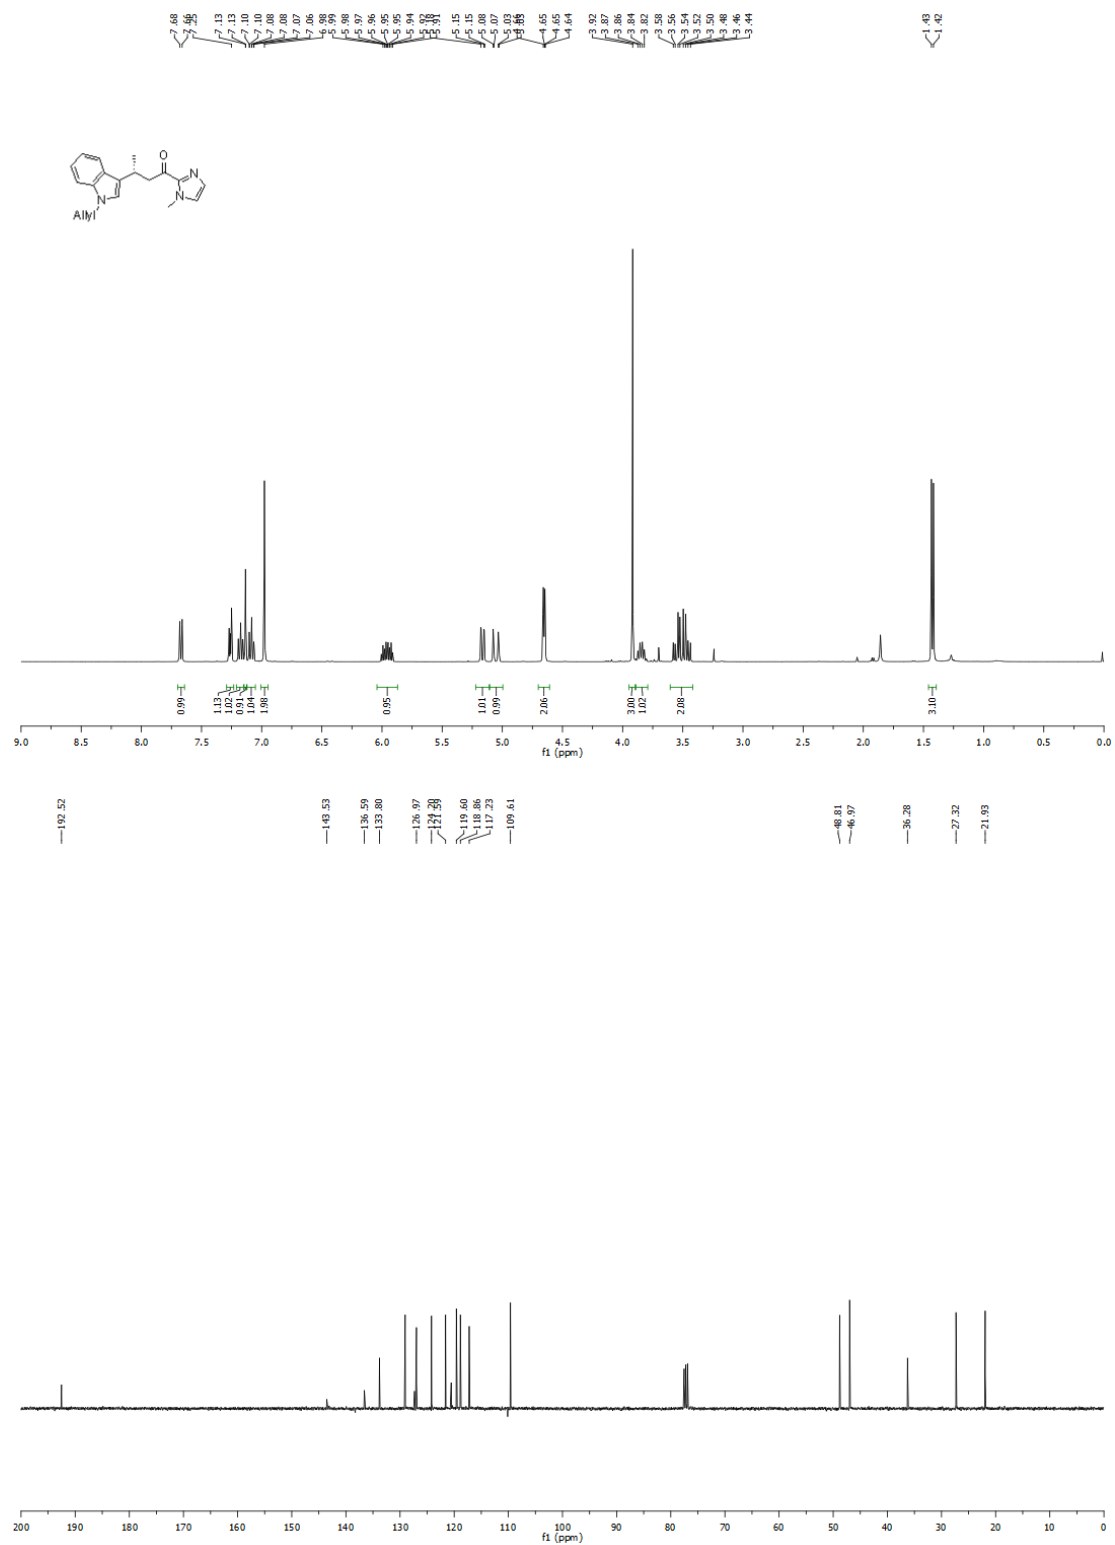

(R)-1-(1-Methyl-1H-imidazol-2-yl)-3-(1-(p-tolyl)-1H-indol-3-yl)butan-1-one (5d)

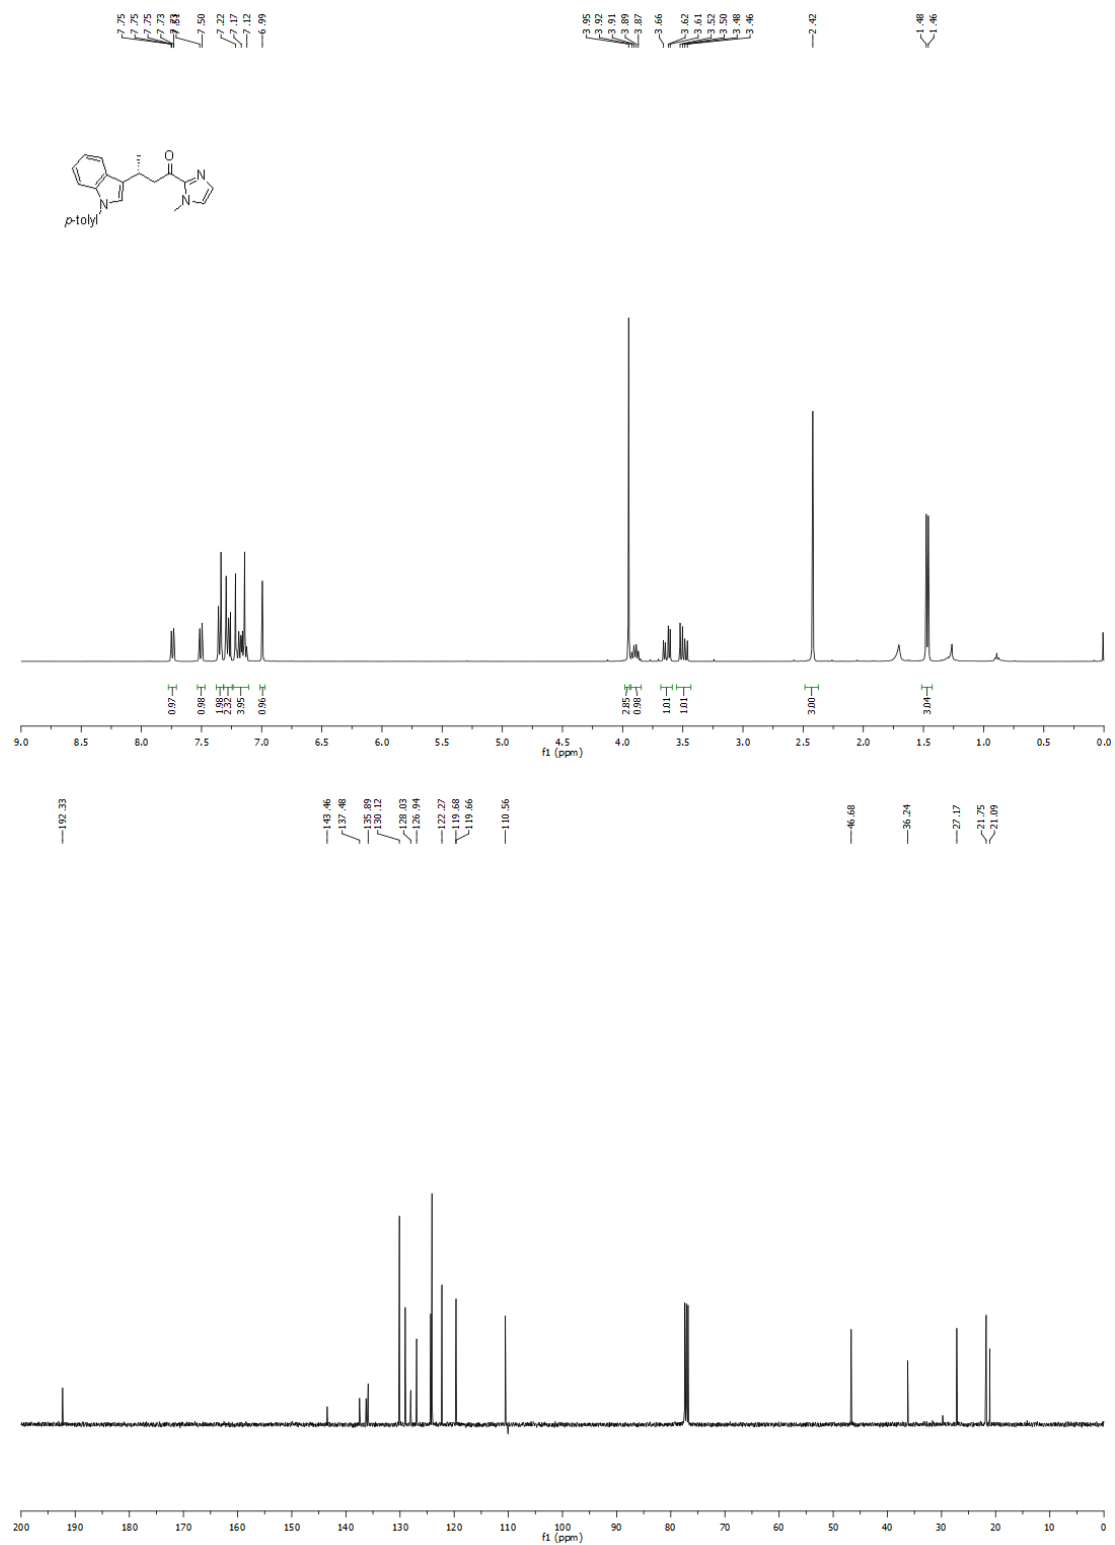

(*R*)-3-(1-Benzyl-6-methoxy-1*H*-indol-3-yl)-1-(1-methyl-1*H*-imidazol-2-yl)butan-1-one (**5e**)

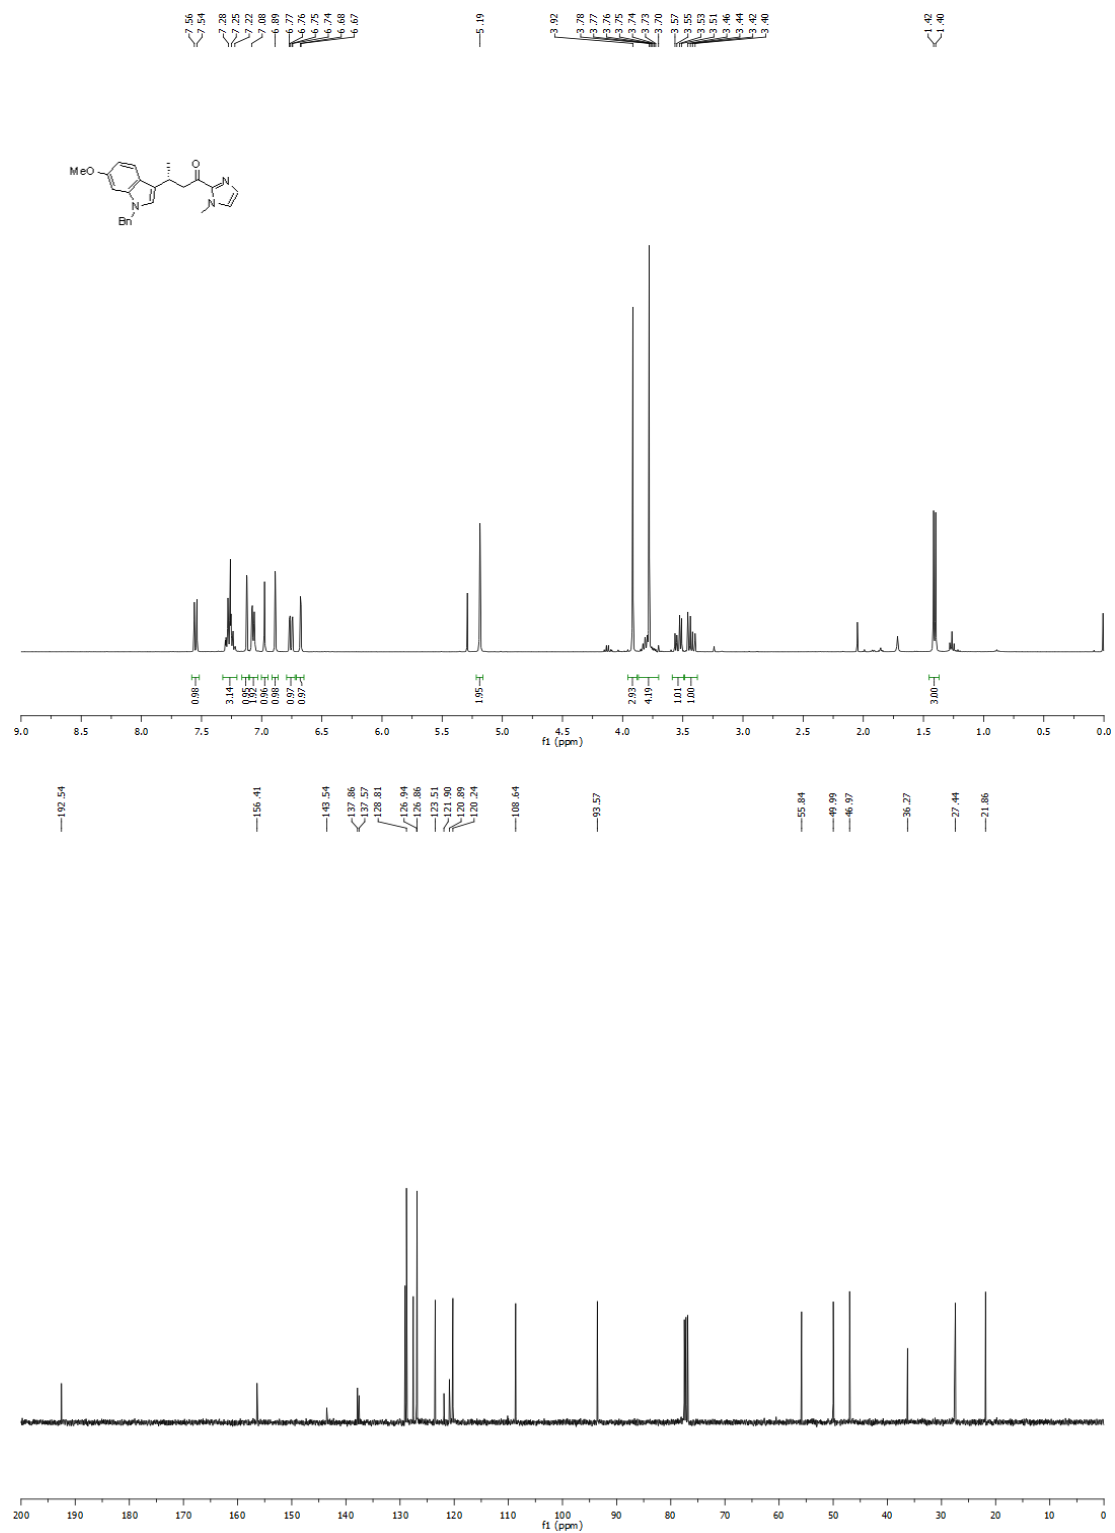

(*R*)-3-(5-Bromo-1-methyl-1*H*-indolyl)-1-(1-methyl-1*H*-imidazolyl)butan-1-one (**5f**)

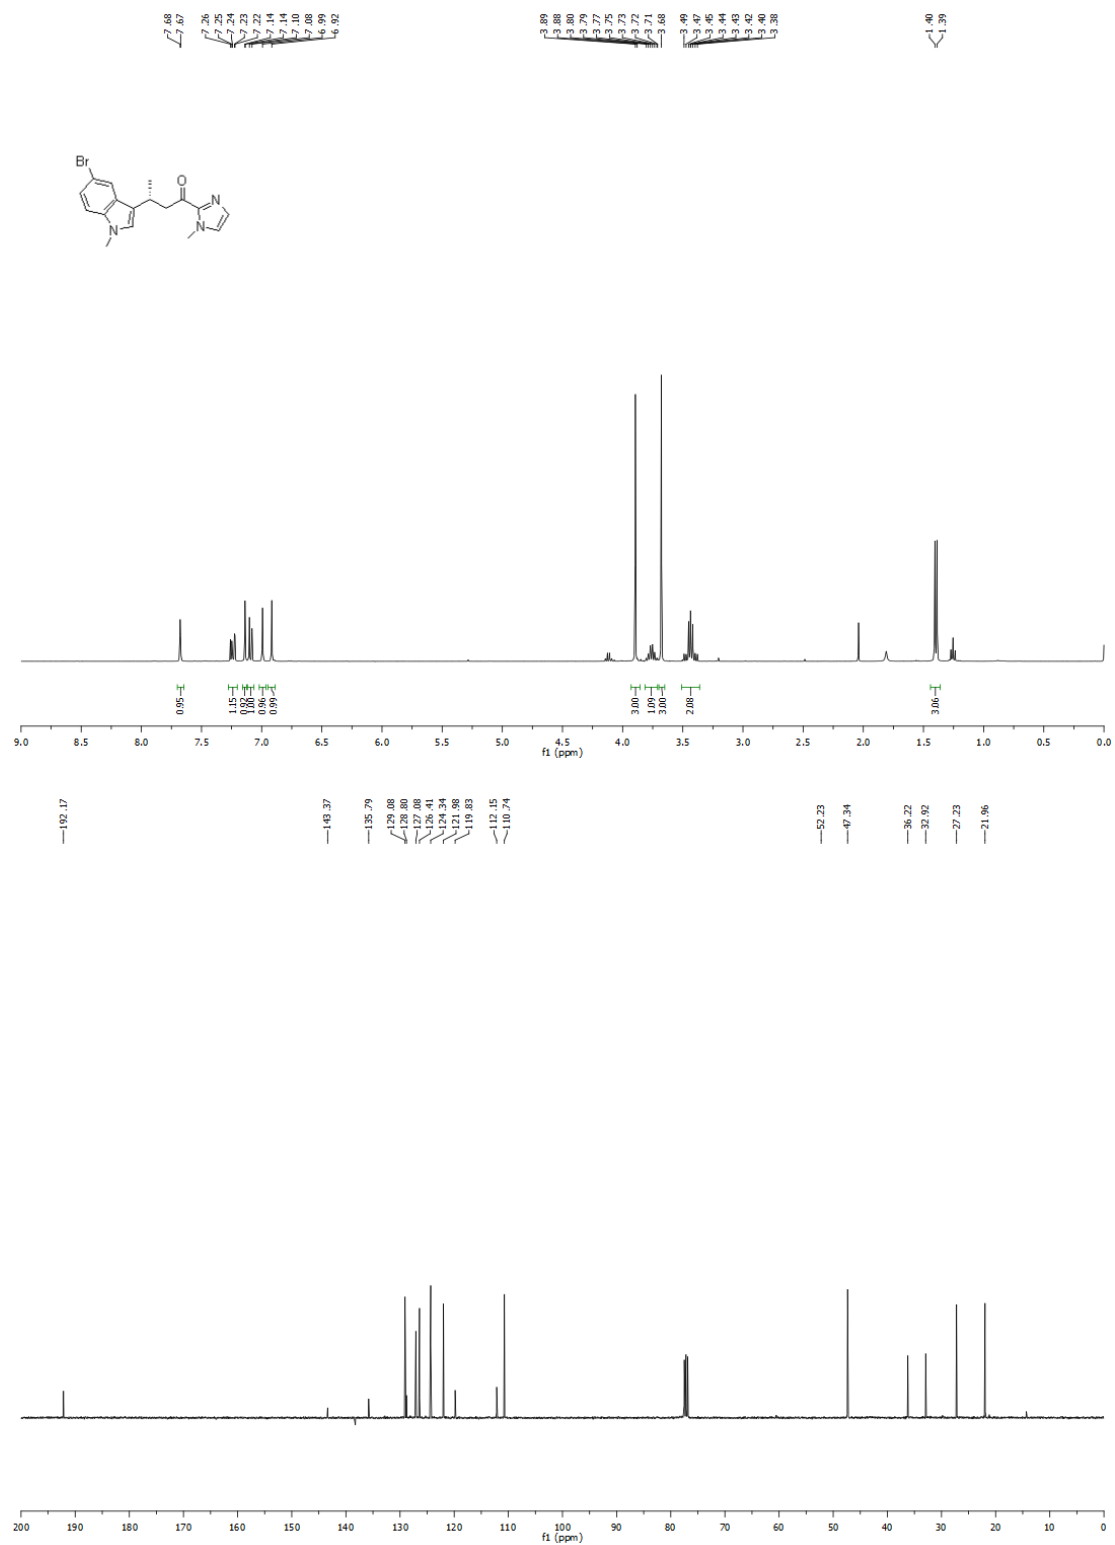

(*R*)-3-(1-Benzyl-5-chloro-1*H*-indolyl)-1-(1-methyl-1*H*-imidazolyl)butan-1-one (**5g**)

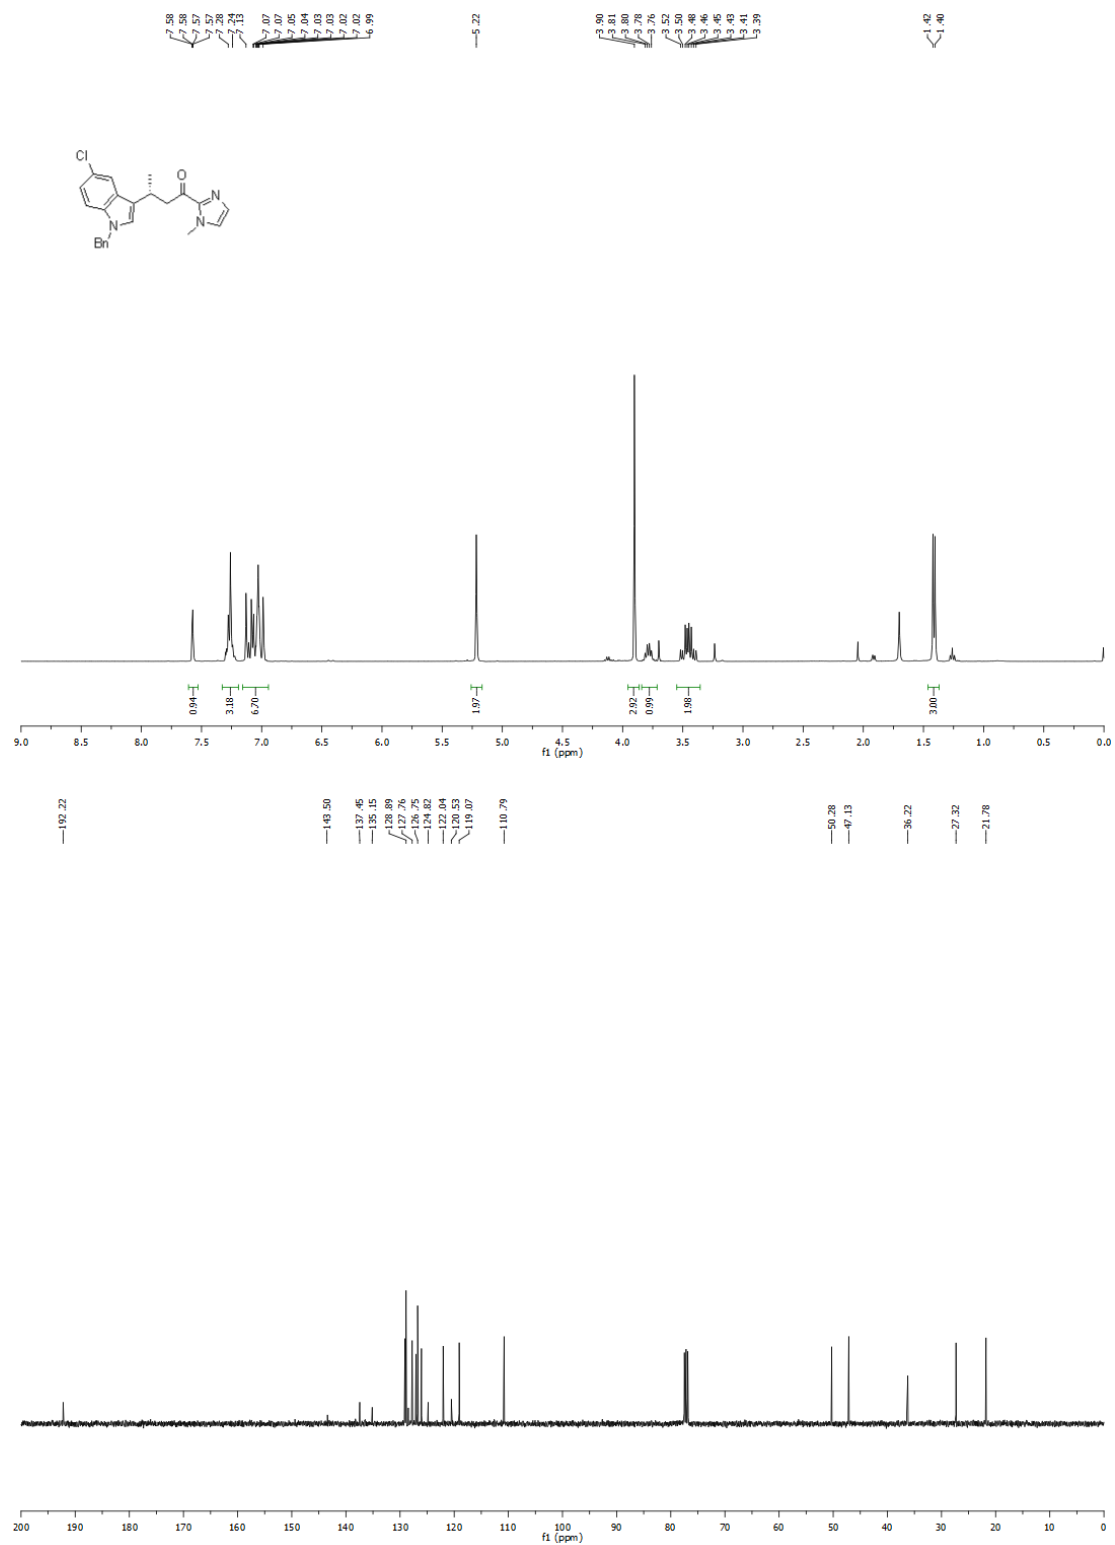

(*R*)-3-(1-Benzyl-5-methoxy-1*H*-indol-3-yl)-1-(1-methyl-1*H*-imidazol-2-yl)butan-1-one (**5h**)

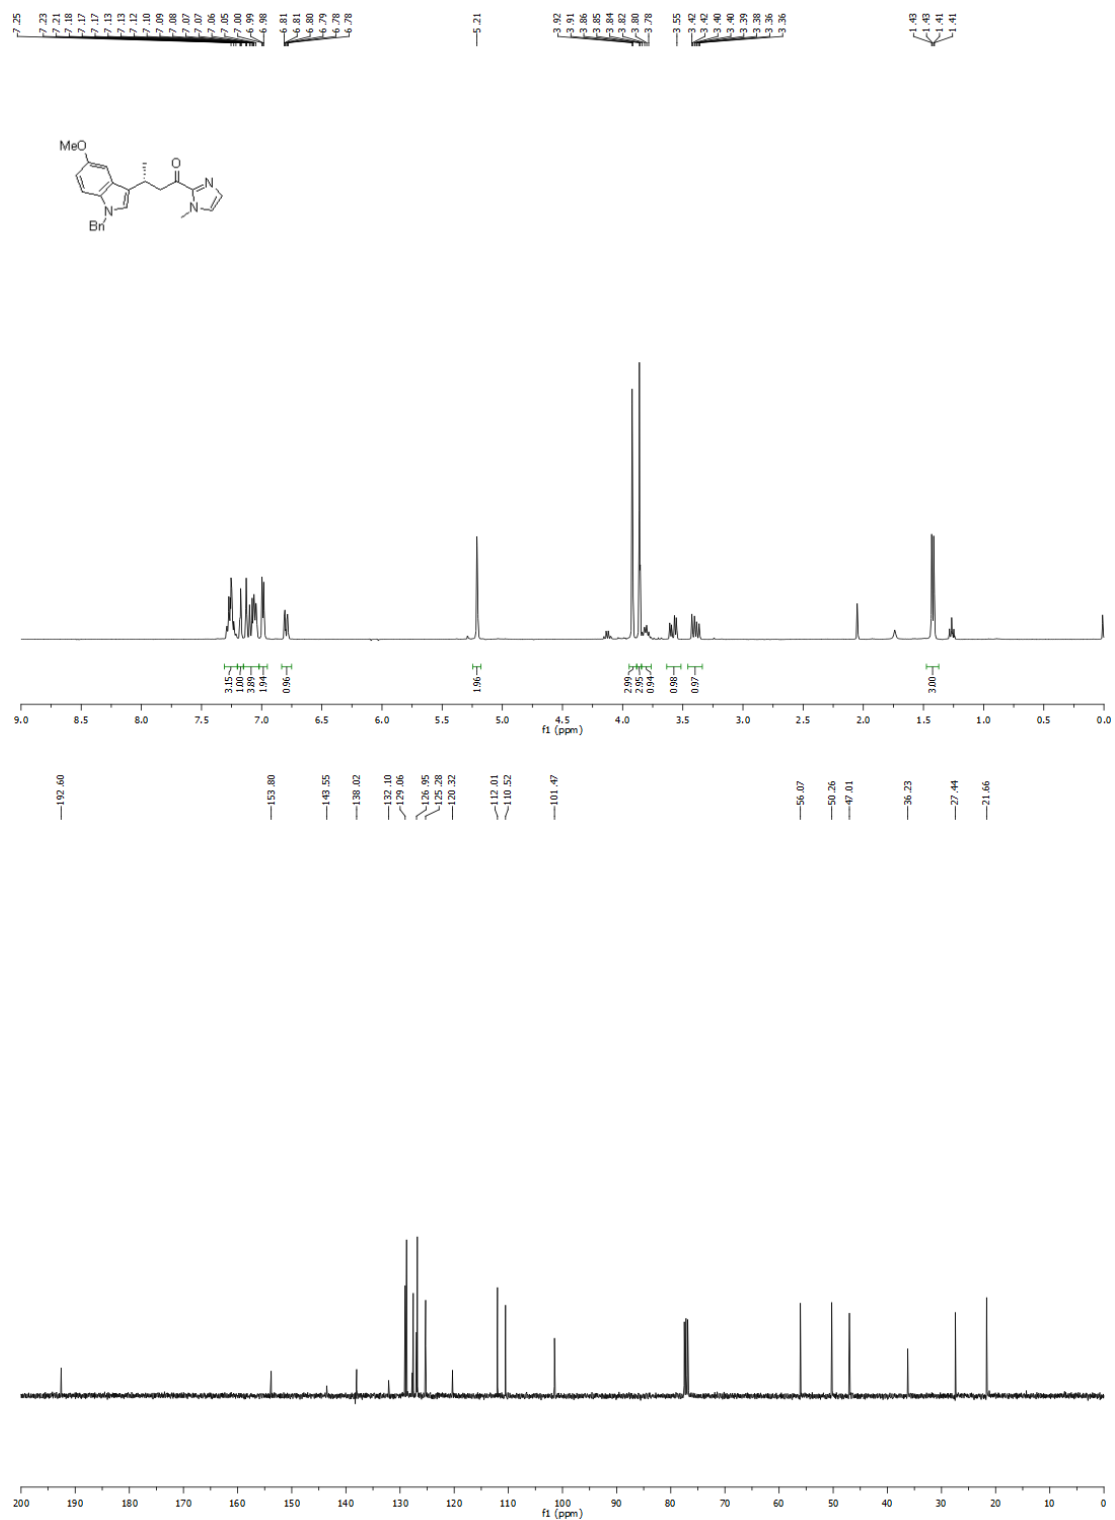

(R)-3-(1,2-Dimethyl-1H-indol-3-yl)-1-(1-methyl-1H-imidazol-2-yl)butan-1-one (5i)

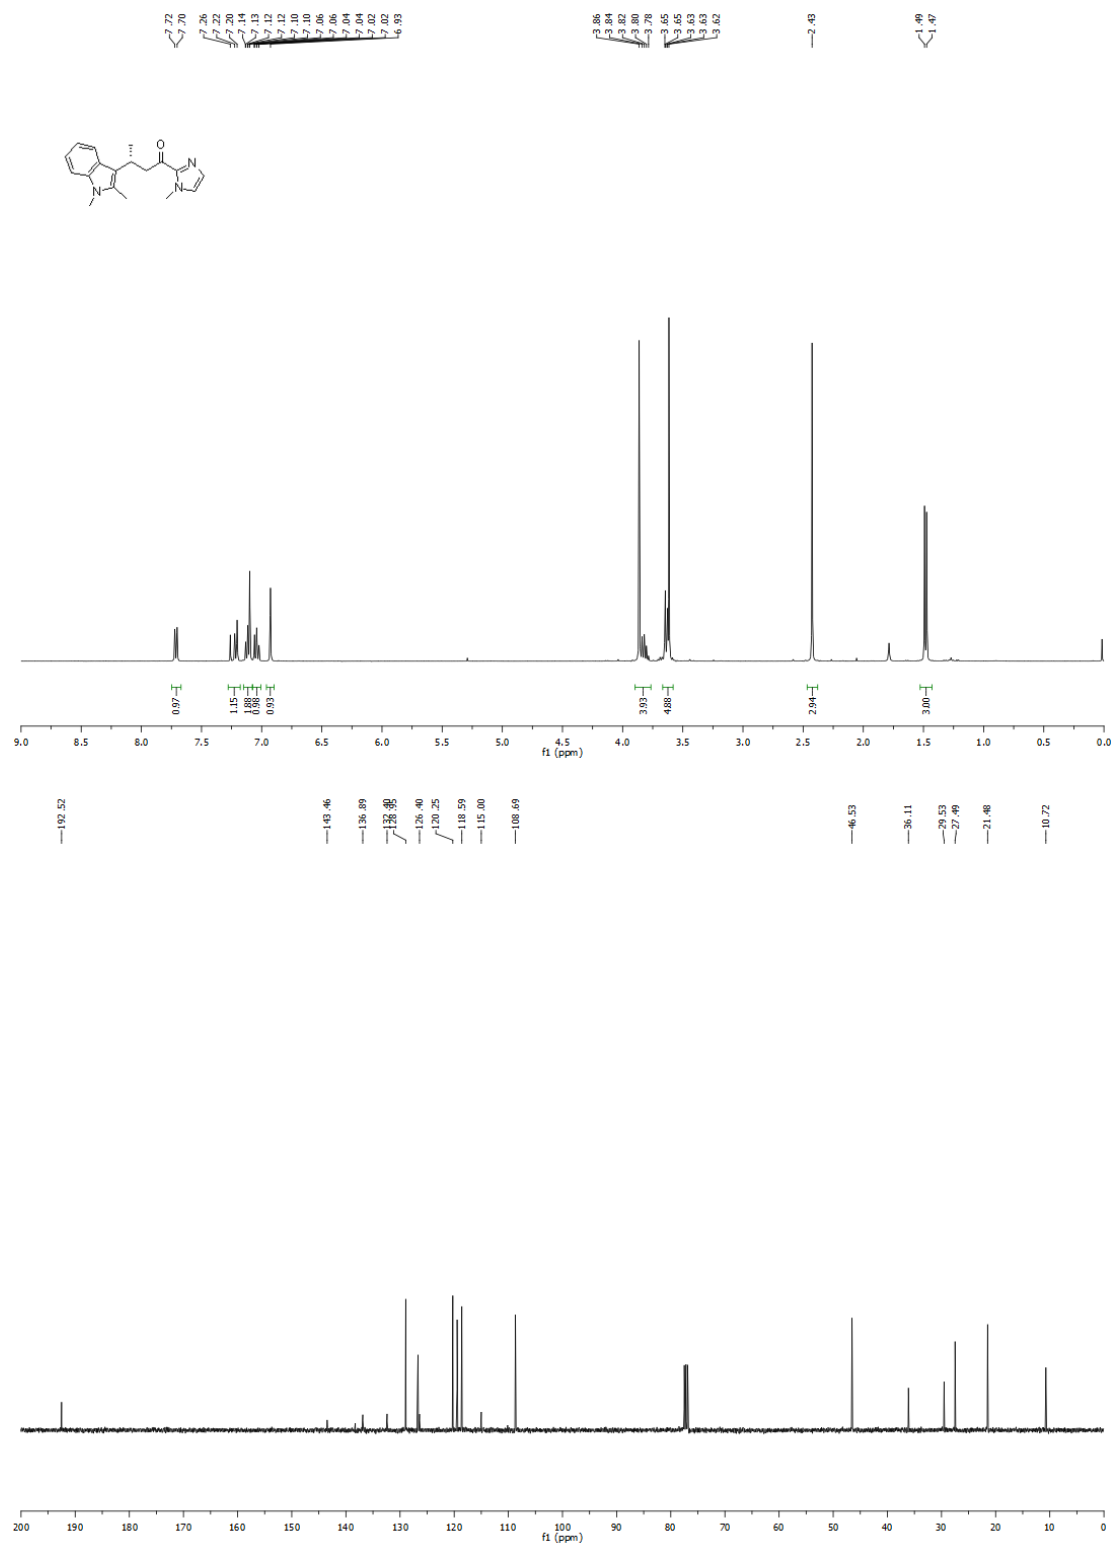

(R)-1-(1-Benzyl-1H-imidazol-2-yl)-3-(1-methyl-1H-indol-3-yl) butan-1-one (**5j**)

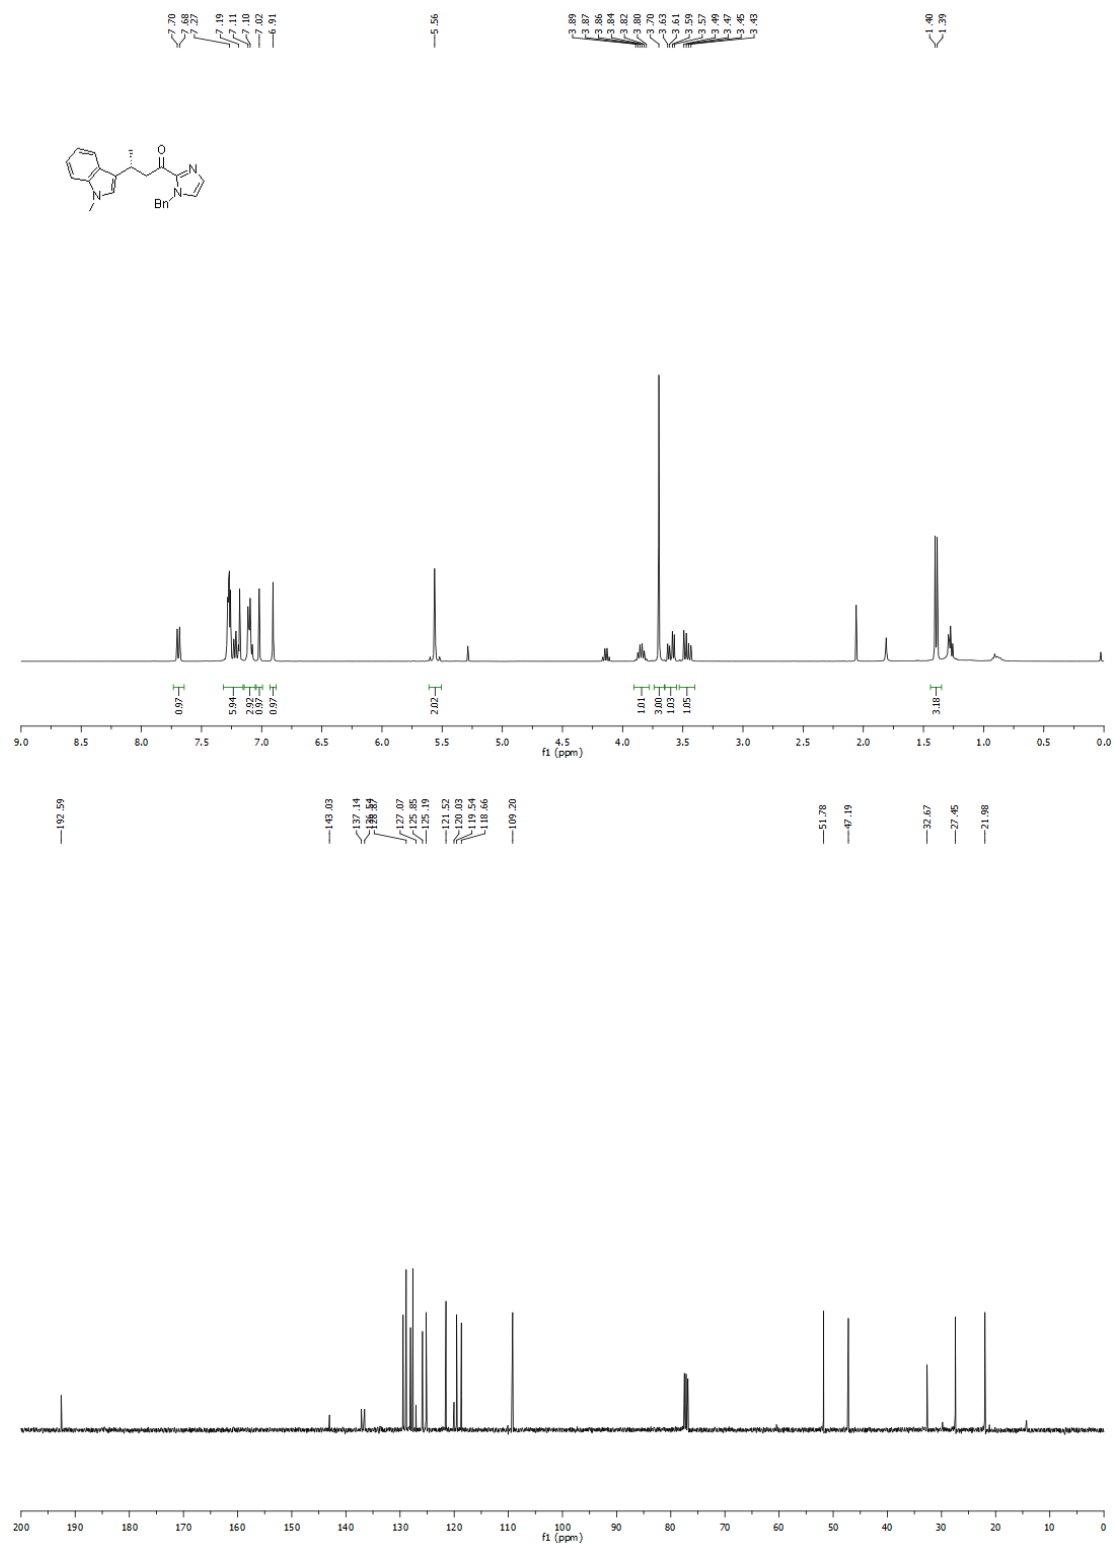



(*R*)-3-(1-Benzyl-1*H*-indol-3-yl)-1-(1-isopropyl-1*H*-imidazol-2-yl) butan-1-one (**5k**)

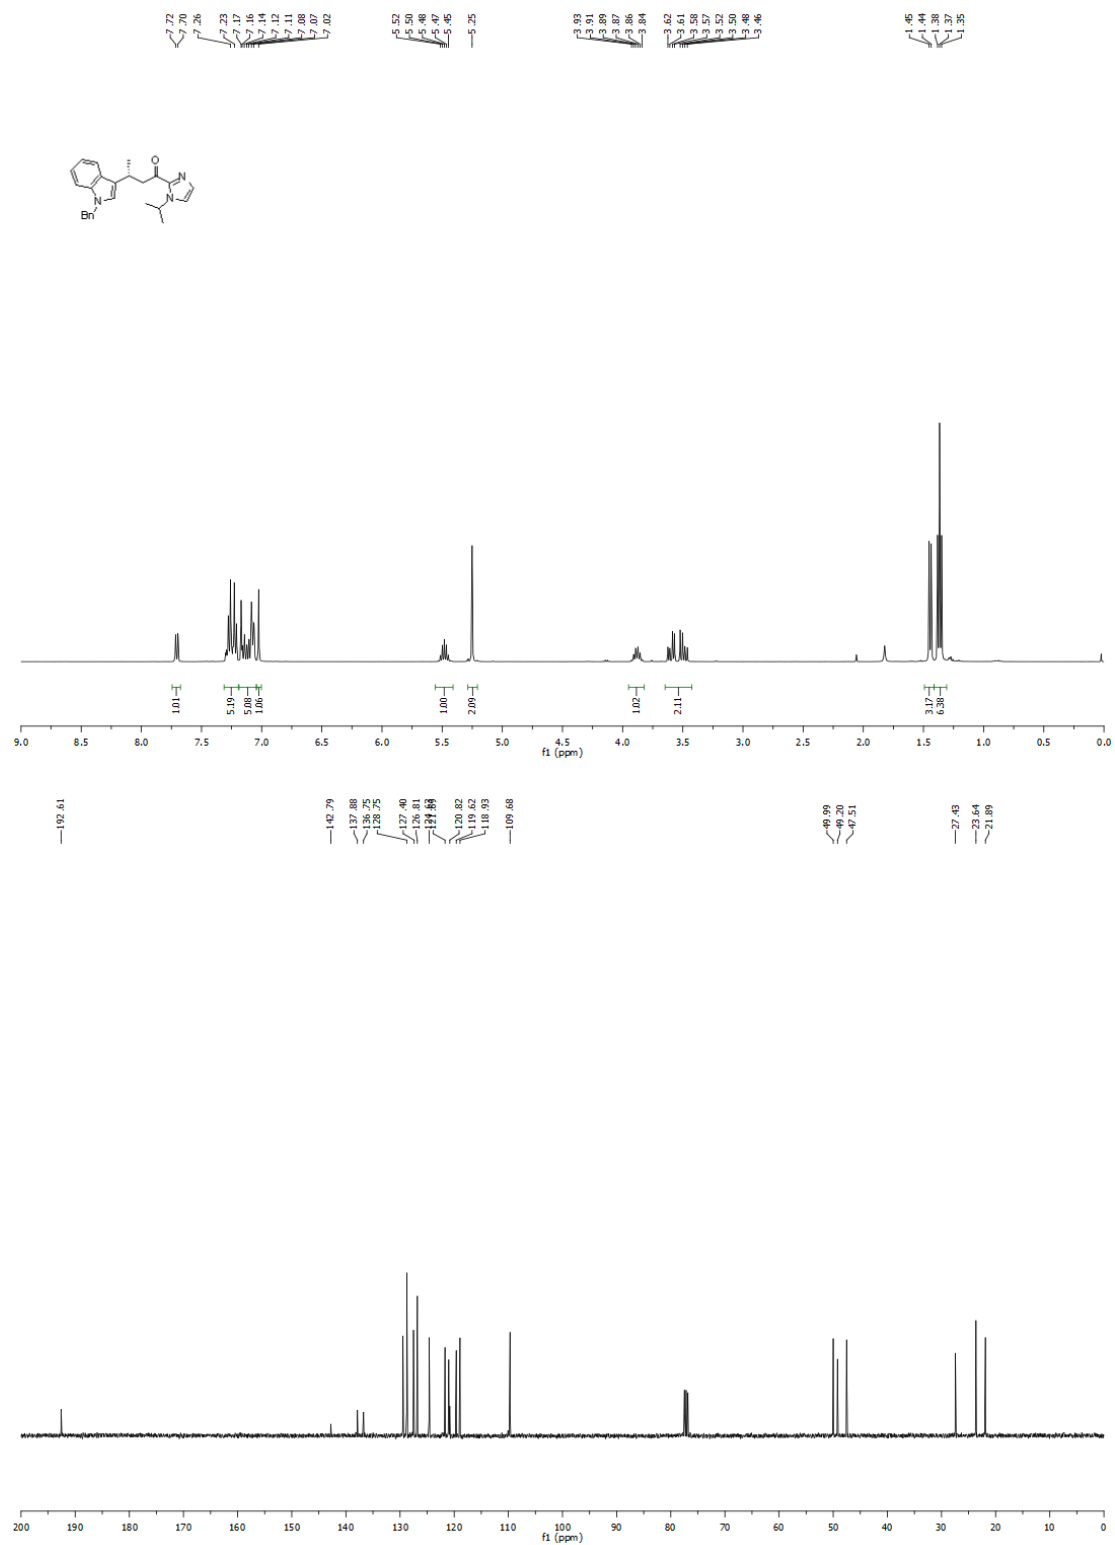

(*R*)-3-(1-Benzyl-1*H*-indol-3-yl)-1-(1-methyl-1*H*-imidazol-2-yl)pentan-1-one (**51**)

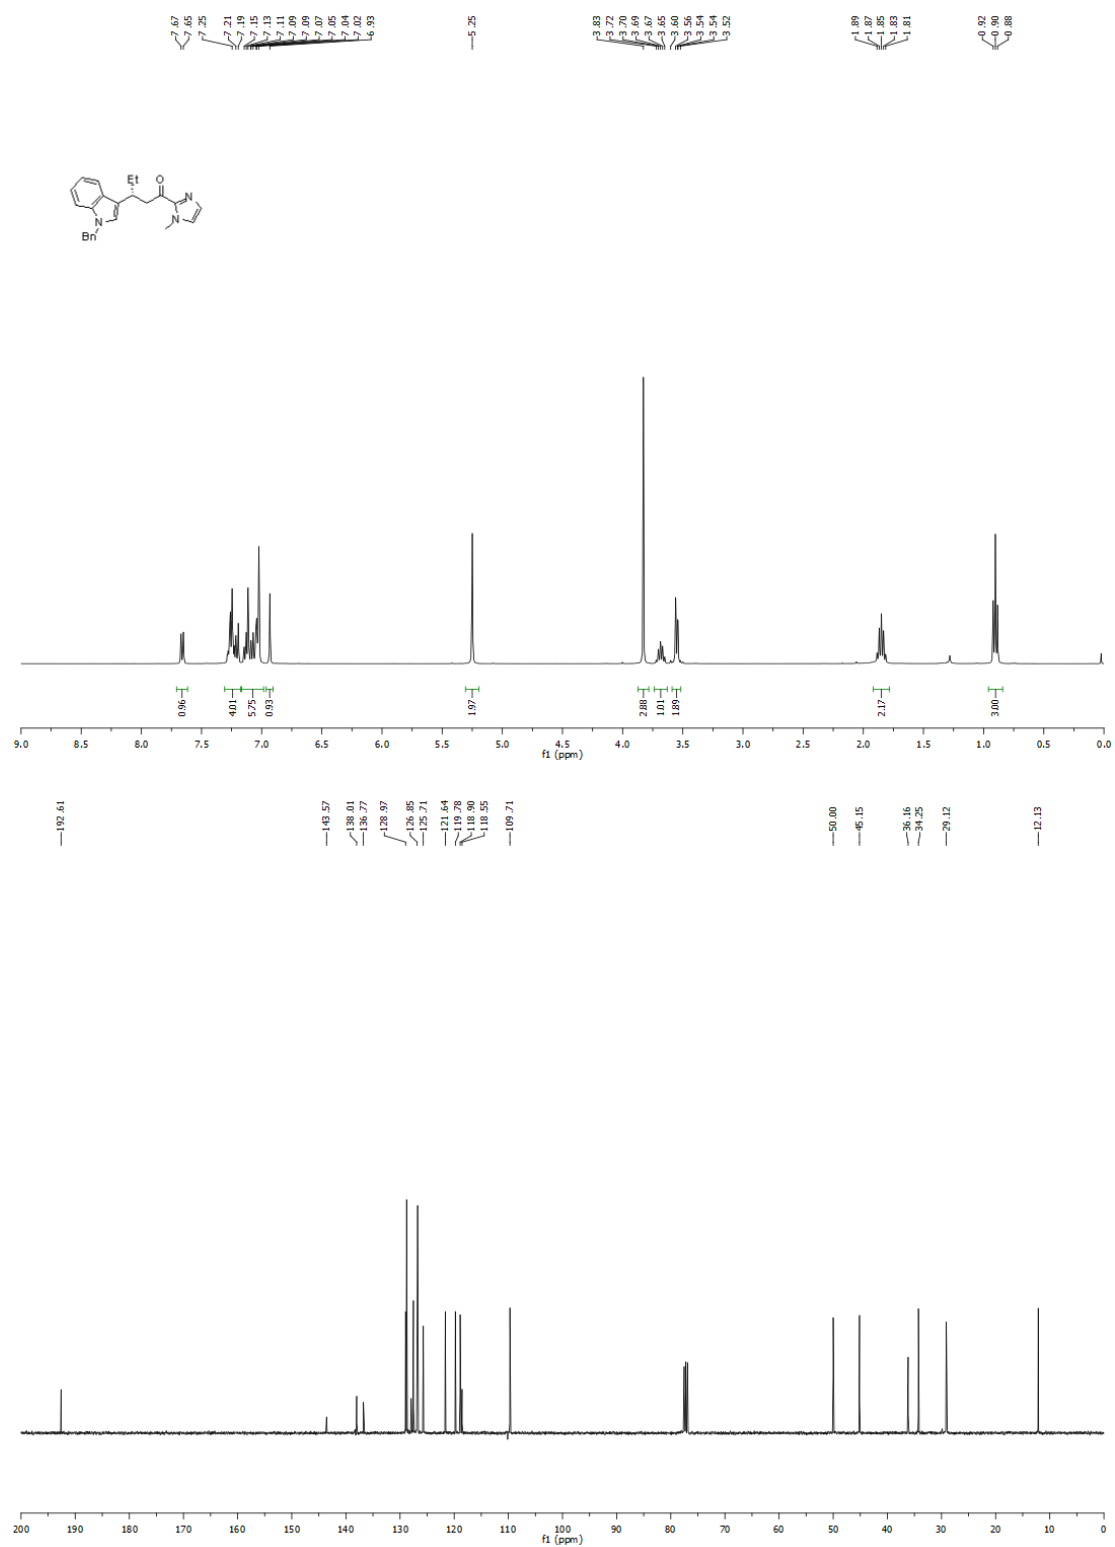

(S)-3-(1-Benzyl-1*H*-indol-3-yl)-1-(1-methyl-1*H*-imidazol-2-yl)-3-phenyl-propan-1-one (**5m**)

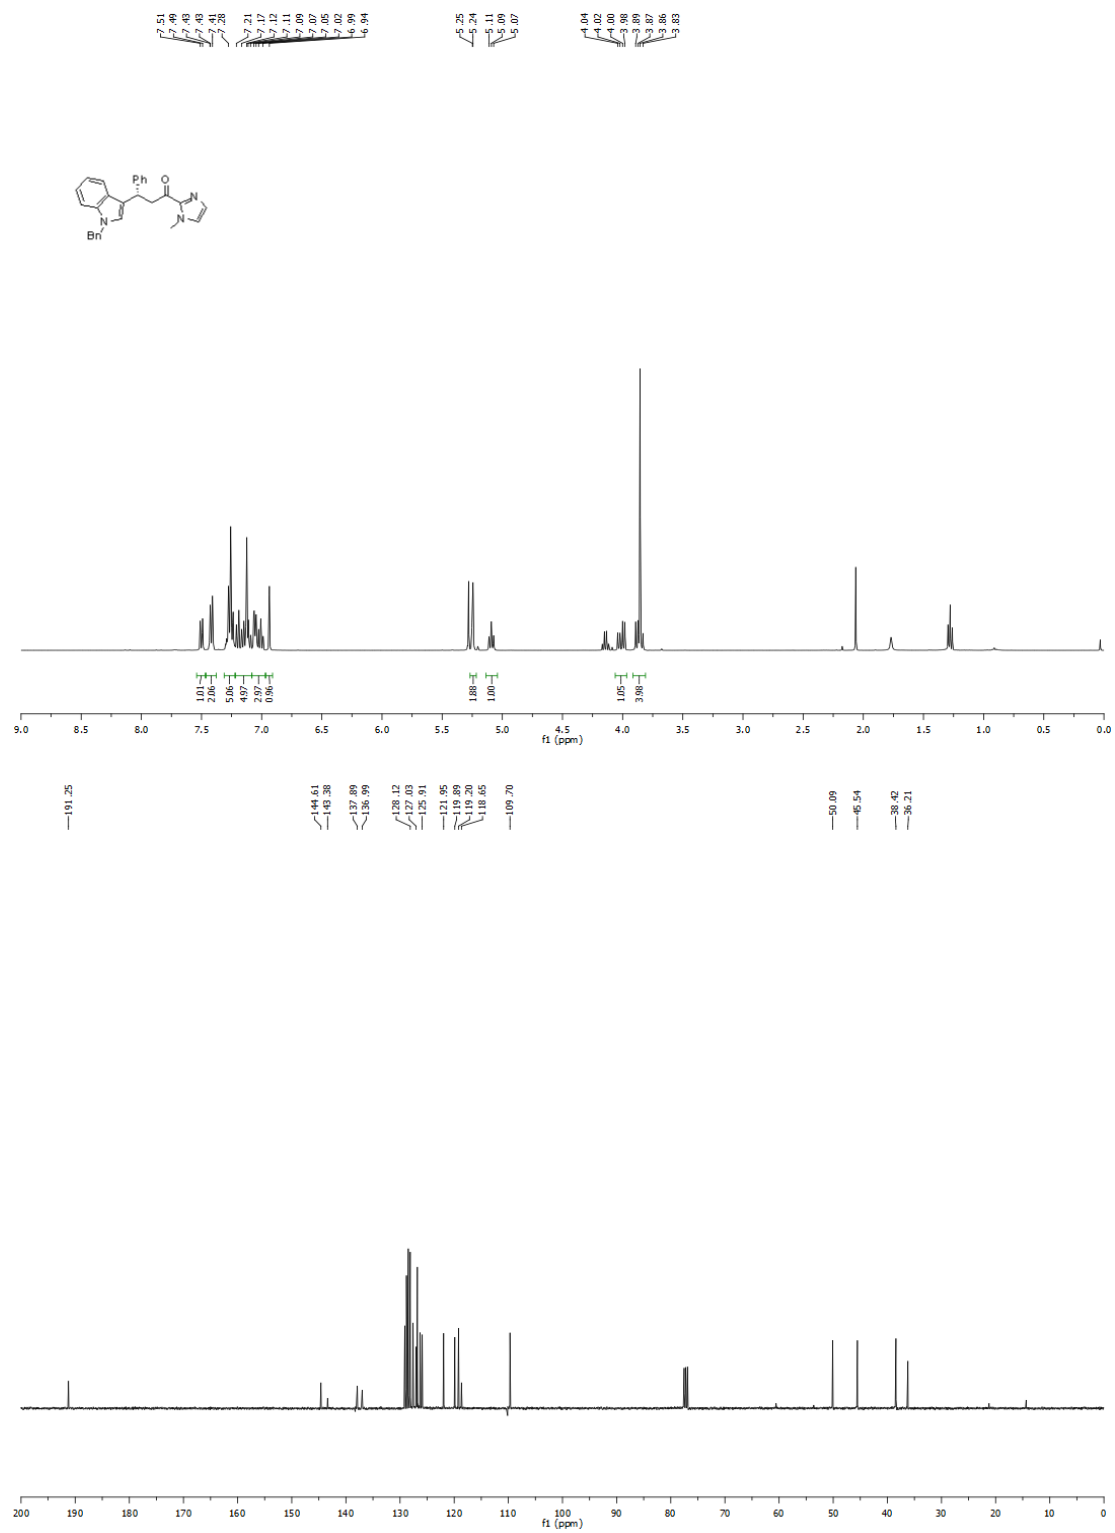

(R)-1-(1-Methyl-1H-imidazol-2-yl)-3-(3-methyl-1H-indol-2-yl)butan-1-one (6a)

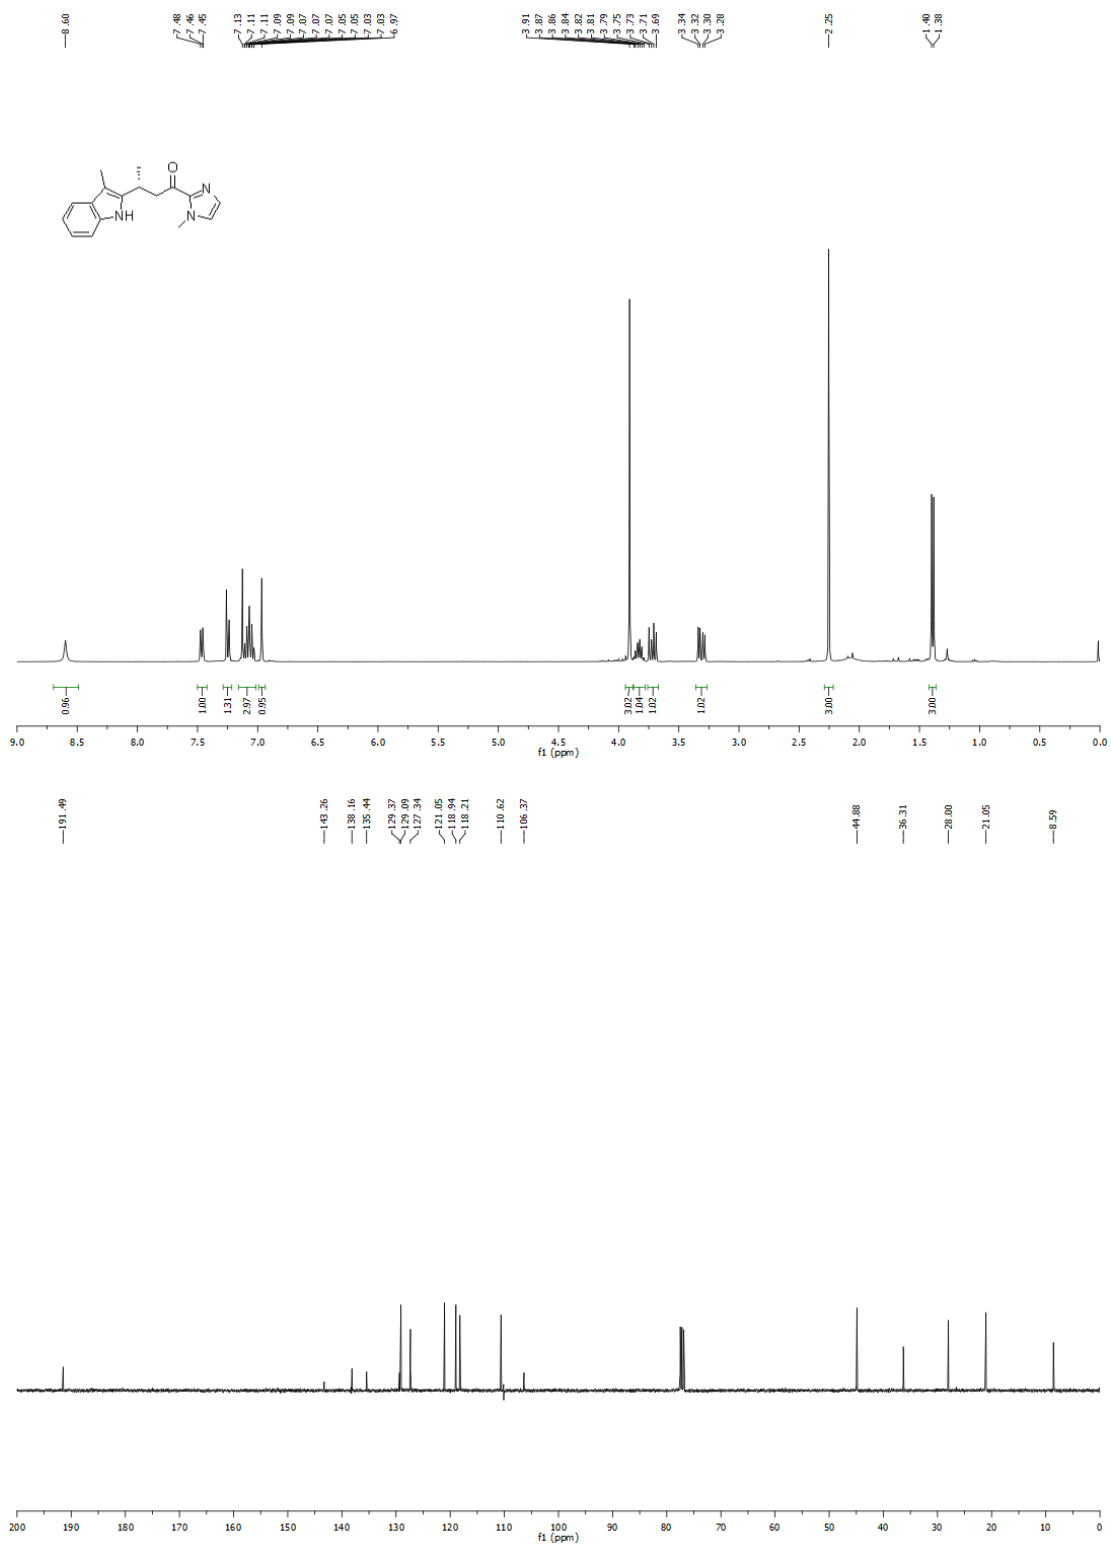

(R)-1-(1-Benzyl-1H-imidazol-2-yl)-3-(3-methyl-1H-indol-2-yl) butan-1-one (**6b**)

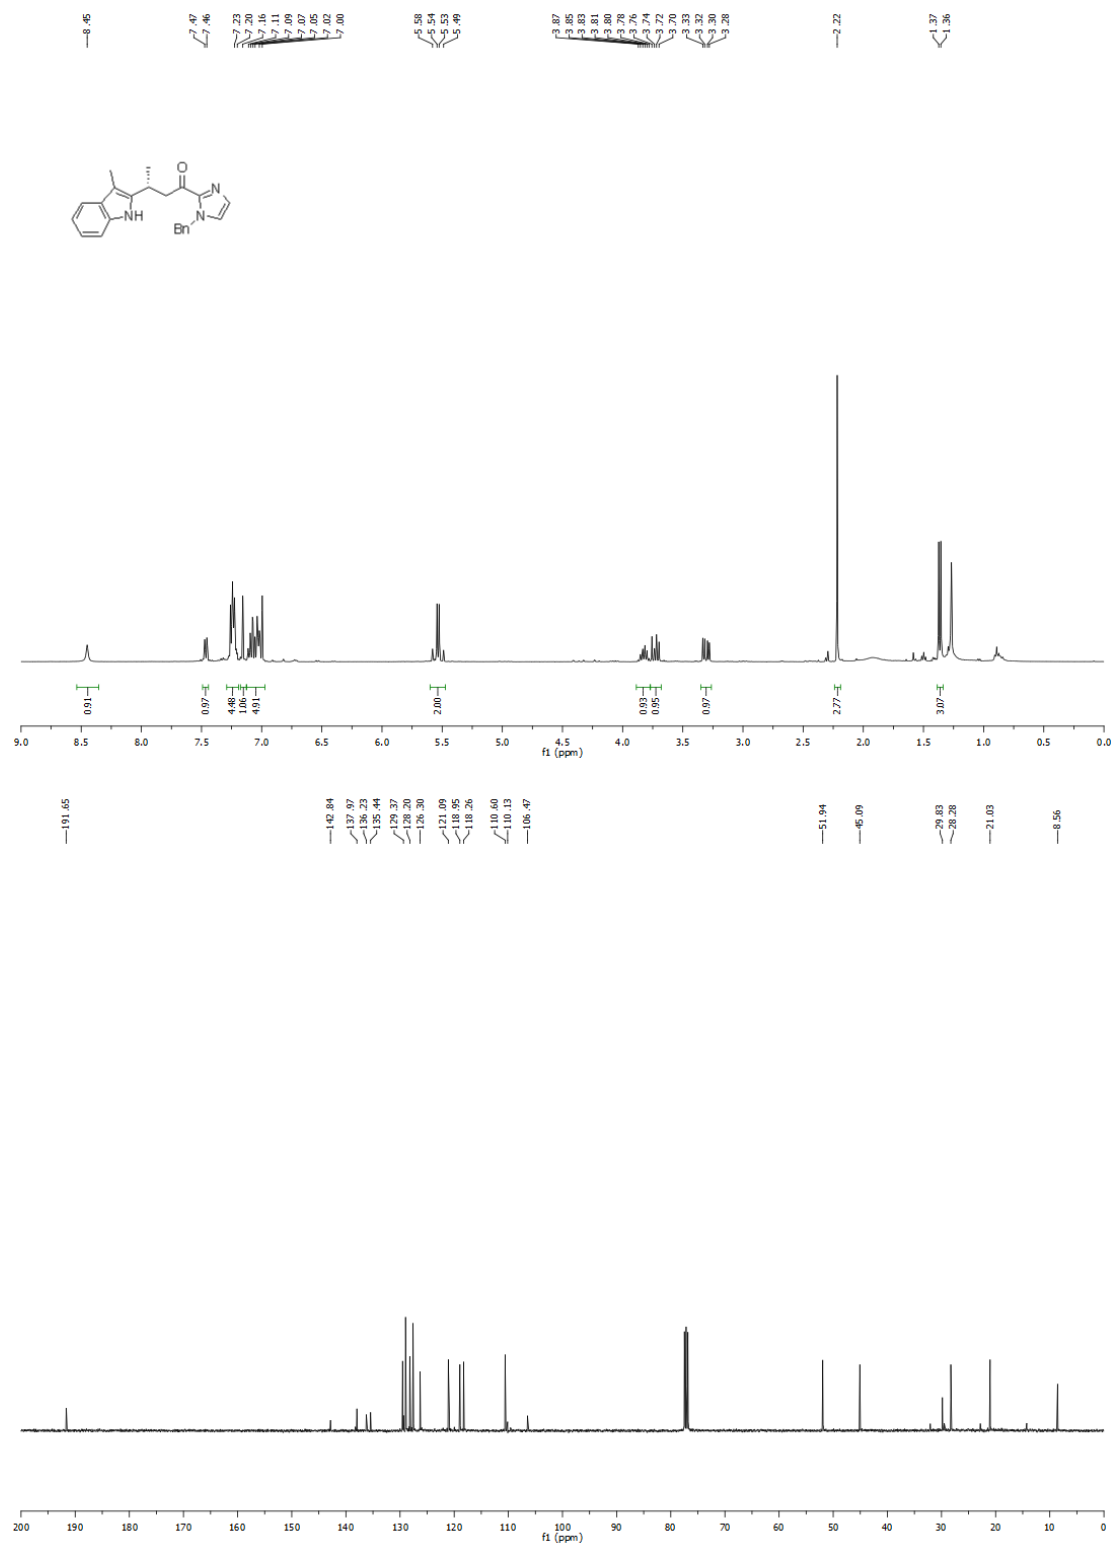

(*R*)-1-(1-Isopropyl-1*H*-imidazol-2-yl)-3-(3-methyl-1*H*-indol-2-yl) butan-1-one (**6c**)

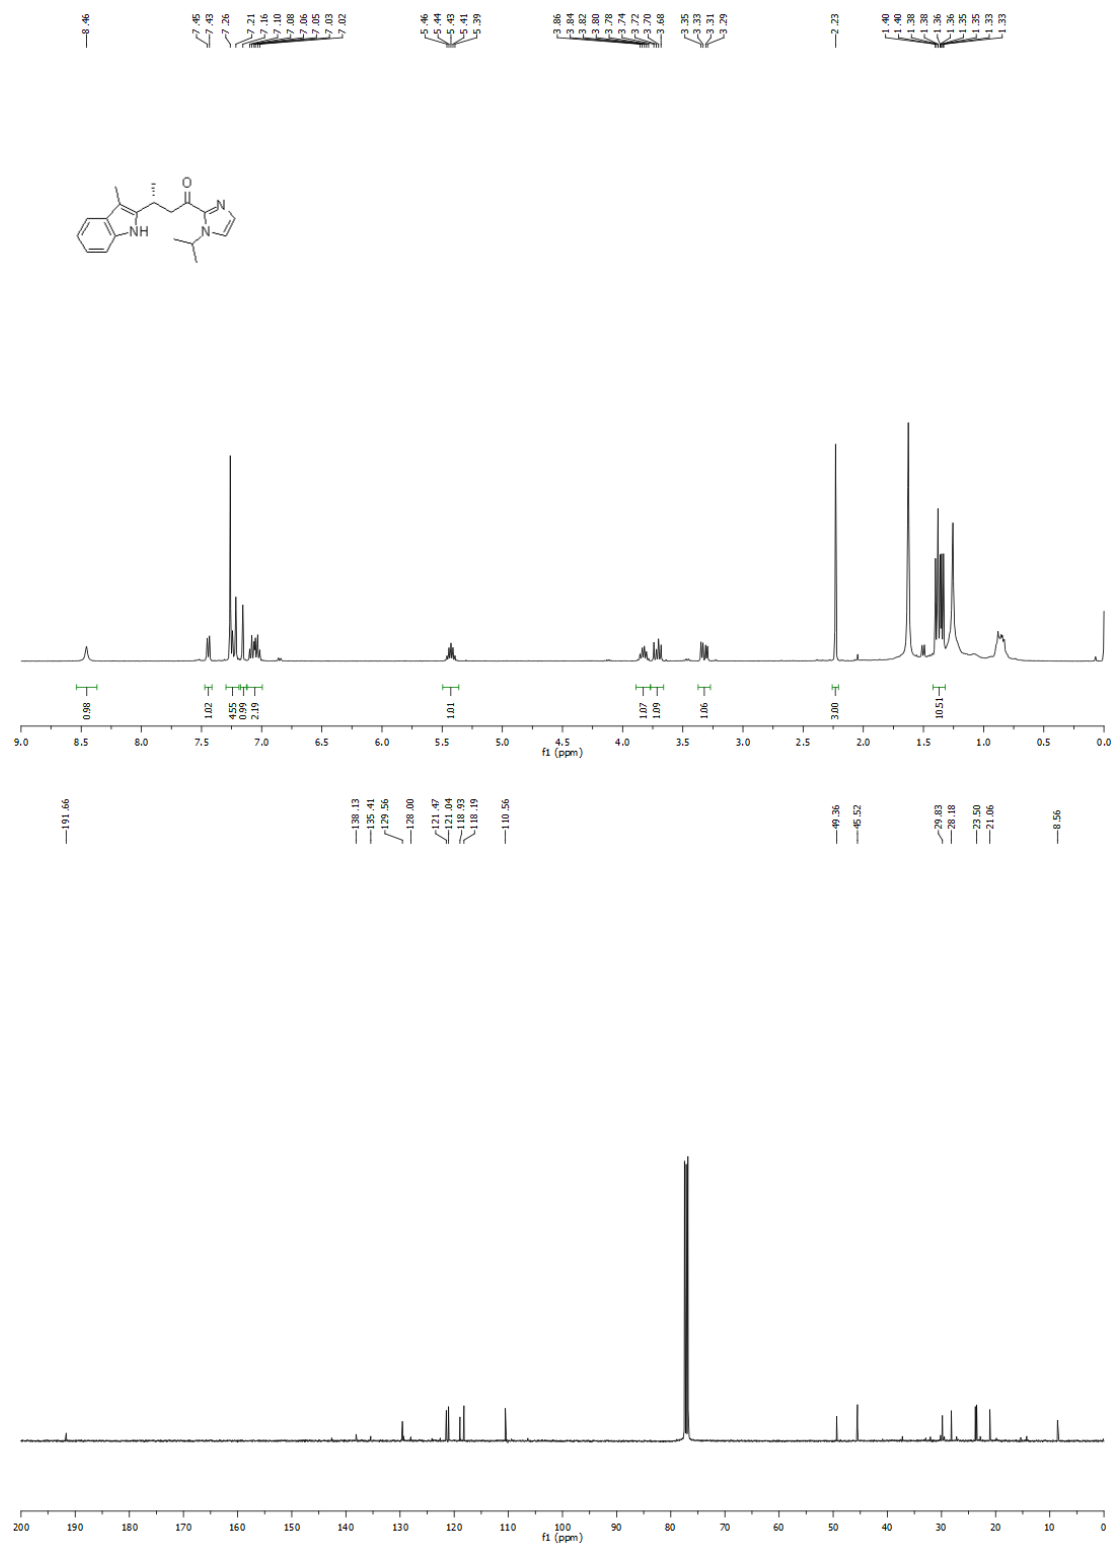

(S)-1-(1-Methyl-1H-imidazol-2-yl)-3-(3-methyl-1H-indol-2-yl)-3-phenyl-propan-1-one (**6d**)

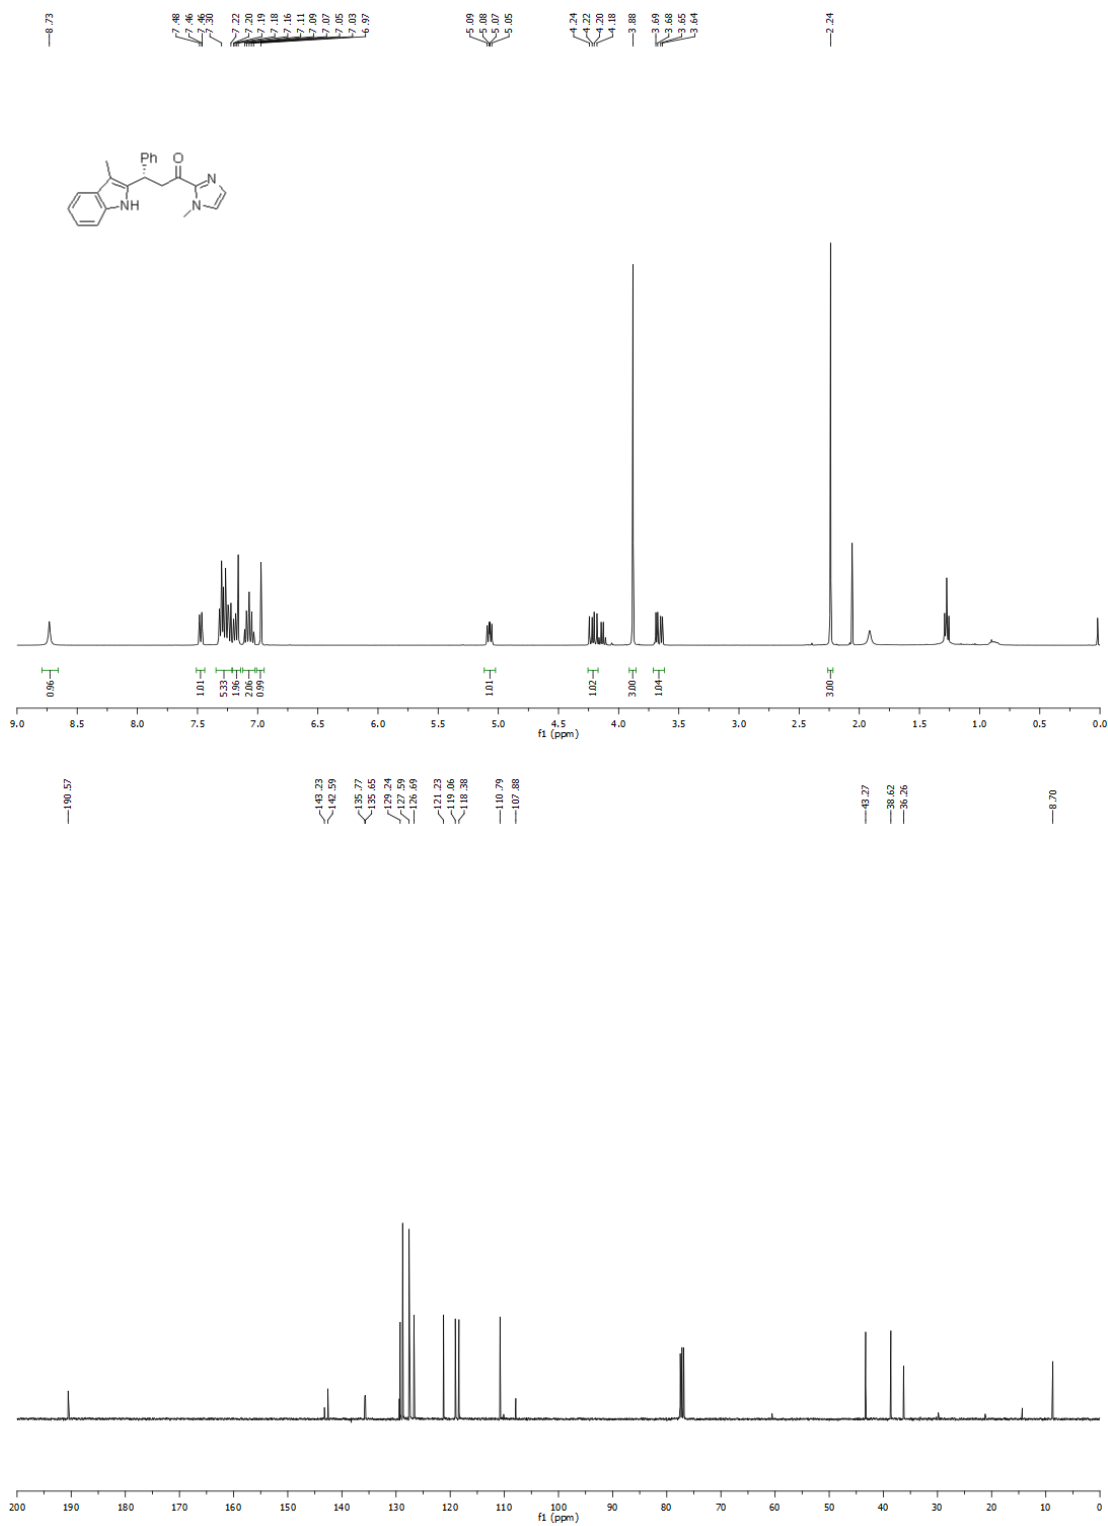

(S)-4-Methyl-1-(1-methyl-1*H*-imidazol-2-yl)-3-(3-methyl-1*H*-indol-2-yl)pentan-1-one (**6e**)

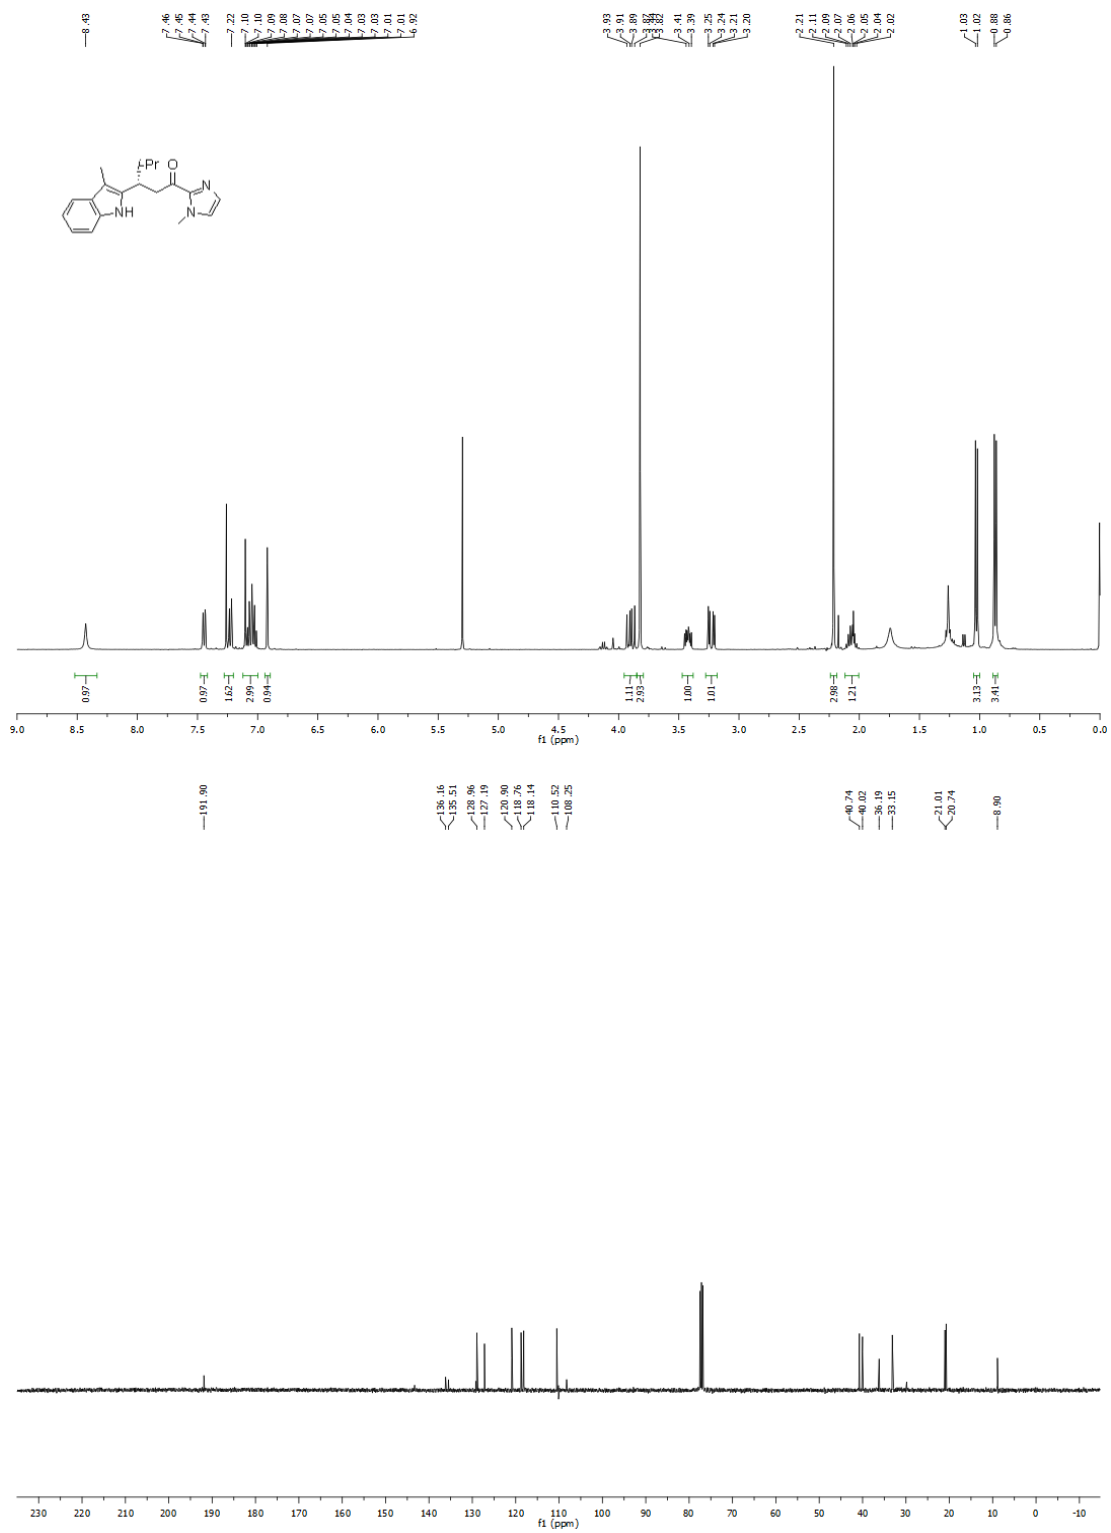



(*R*)-Methyl-4-(1-methyl-1*H*-imidazol-2-yl)-2-(3-methyl-1*H*-indol-2-yl)-4-oxobutanoate (**6f**)

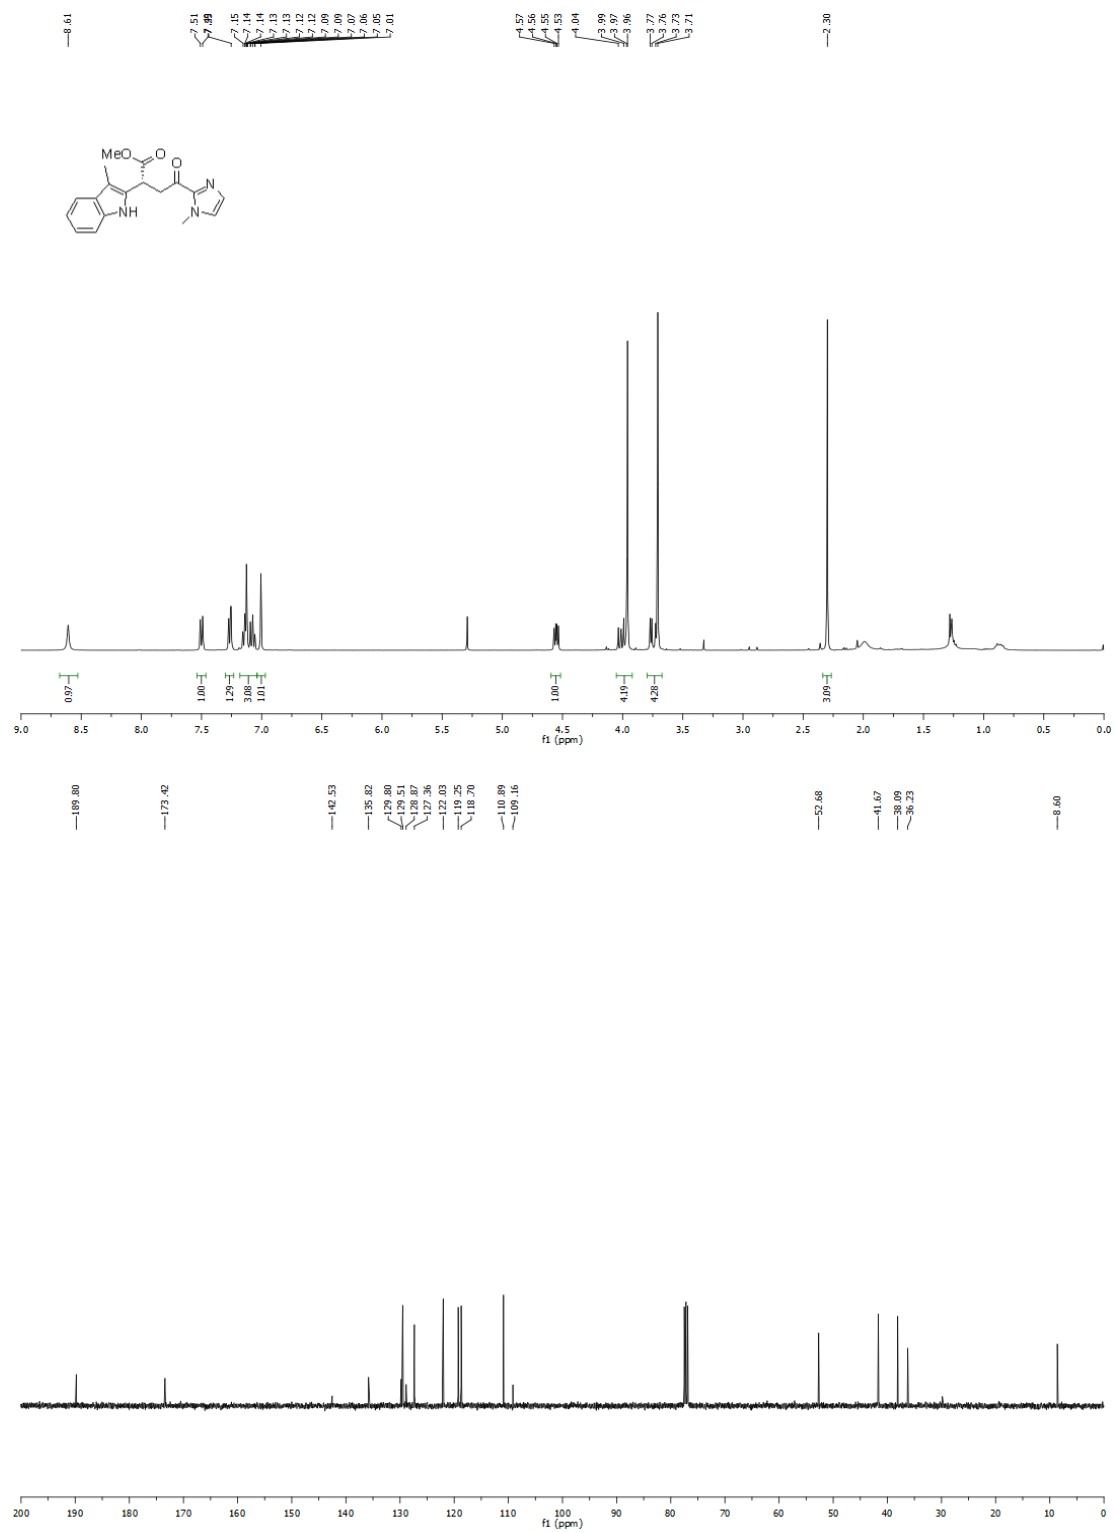

(*R*)-Methyl-4-(1-methyl-1*H*-imidazol-2-yl)-4-oxo-2-(3-propyl-1*H*-indol-2-yl) butanoate (**6g**)

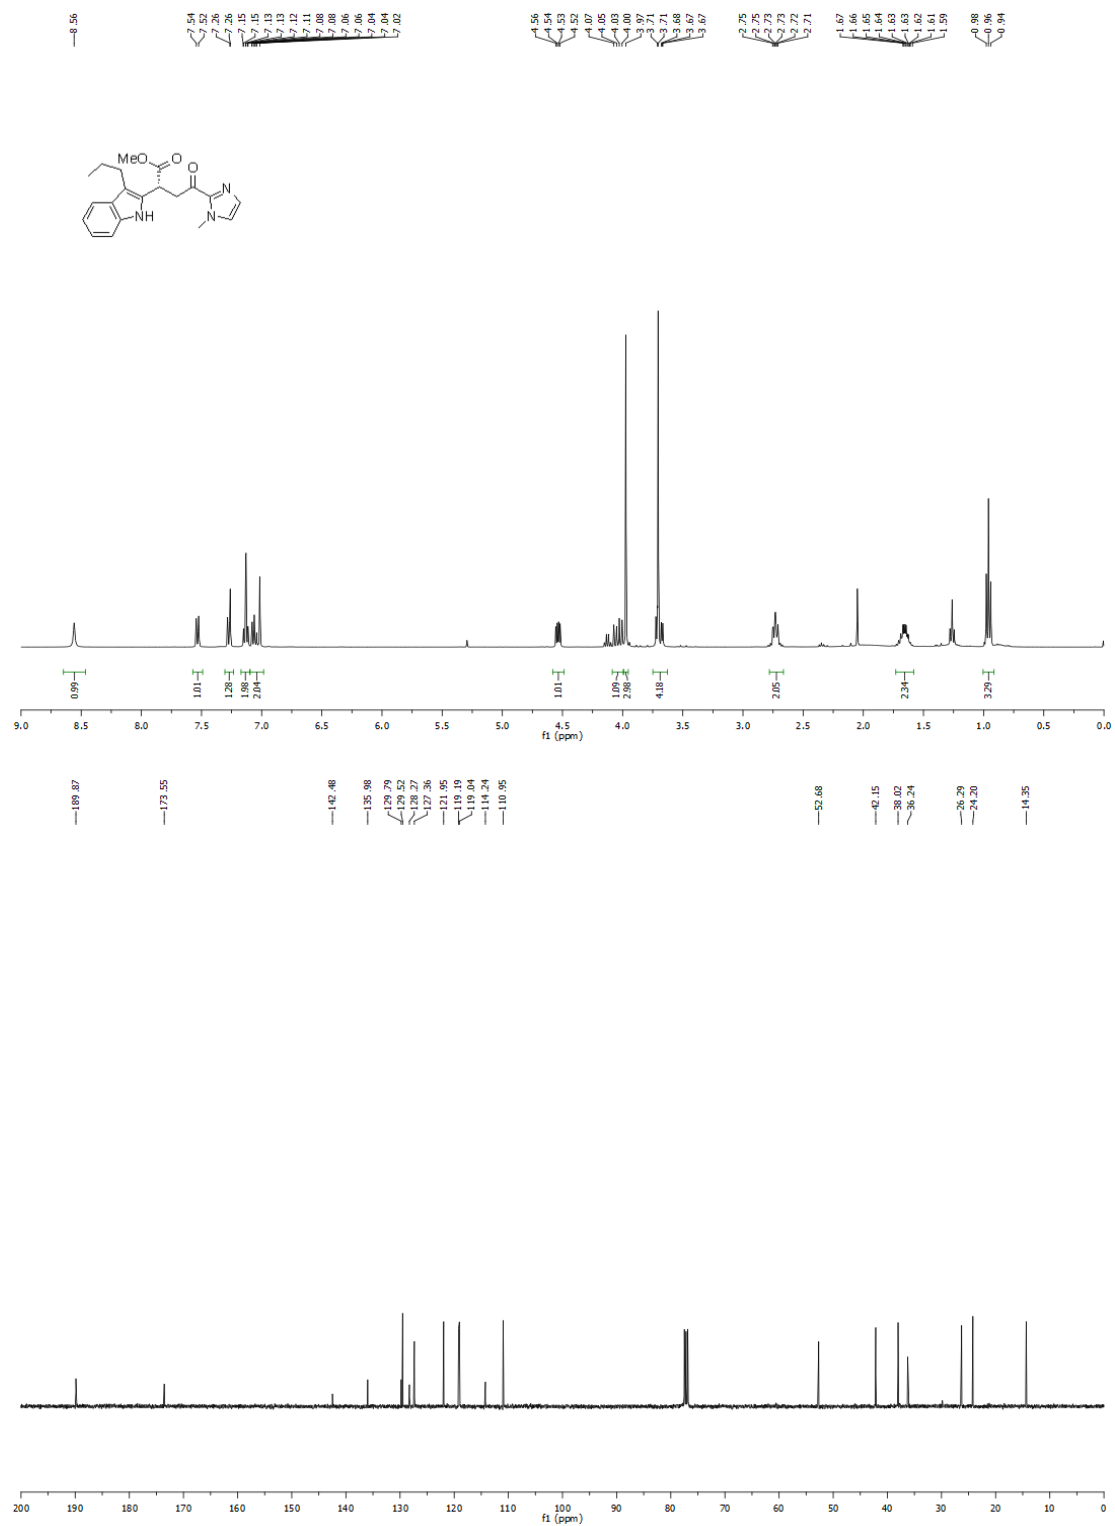

(*R*)-Methyl-2-(5-methoxy-3-methyl-1*H*-indol-2-yl)-4-(1-methyl-1*H*-imidazol-2-yl)-4-oxobutanoate (**6h**)

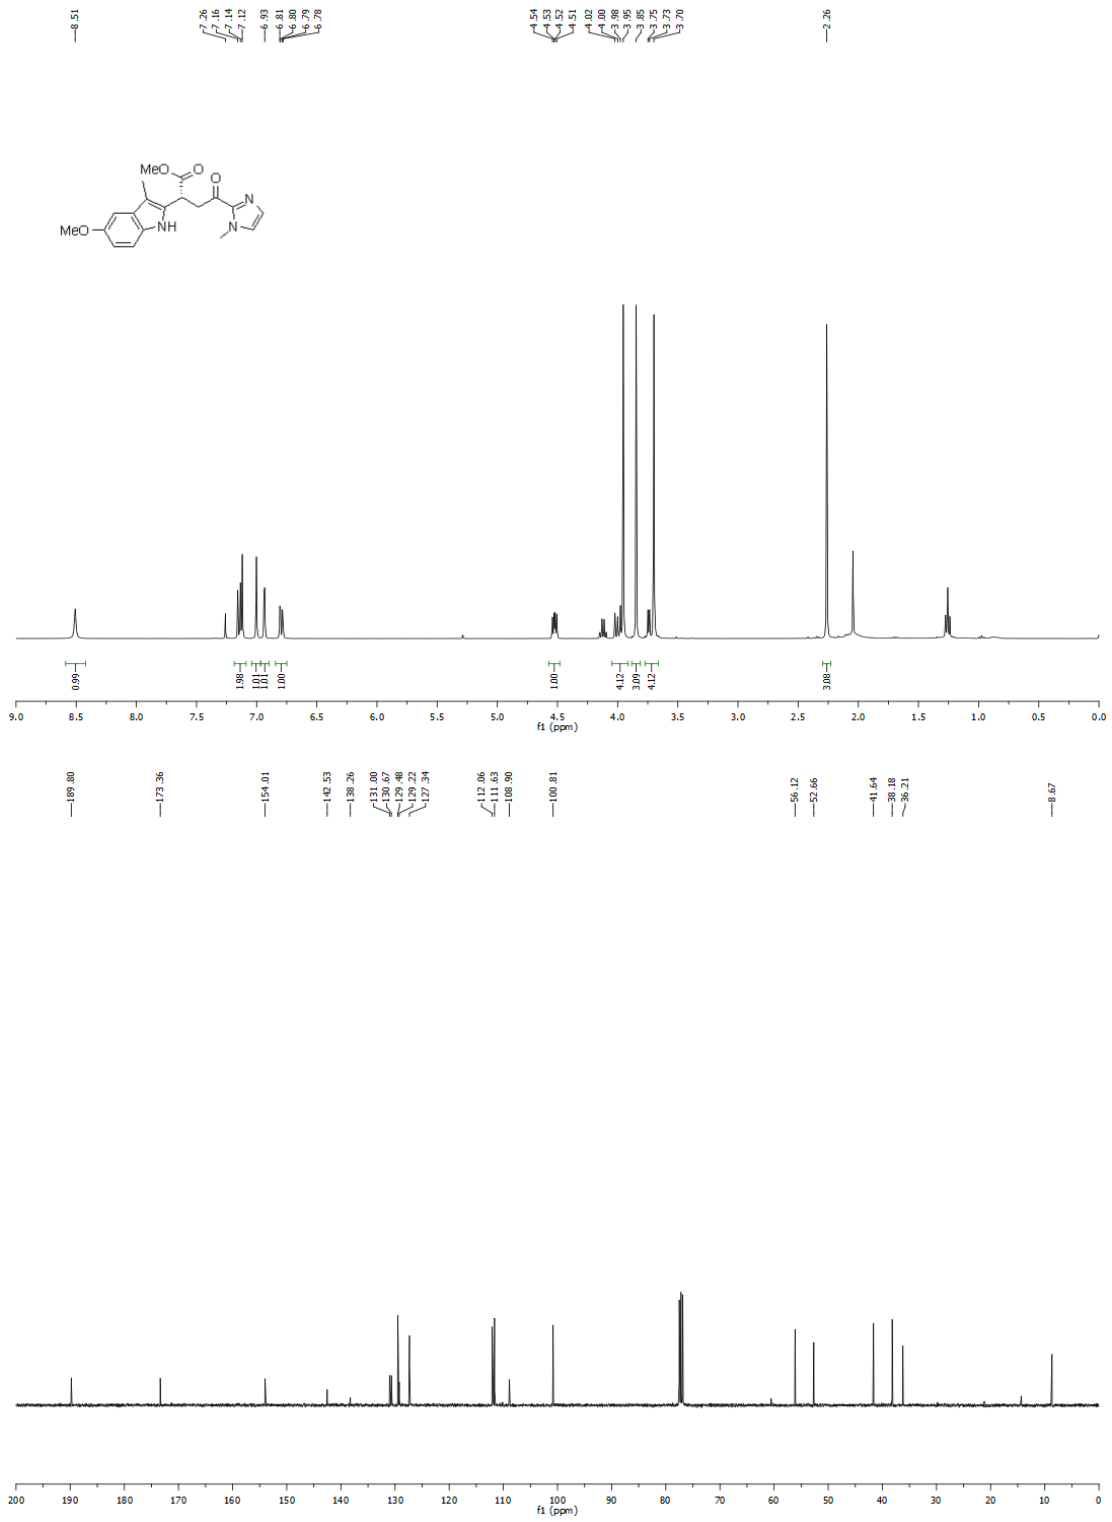

(*R*)-1-(1-Benzyl-1*H*-imidazolyl)-3-(5-bromo-3-methyl-1*H*-indolyl)butan-1-one (**6i**)

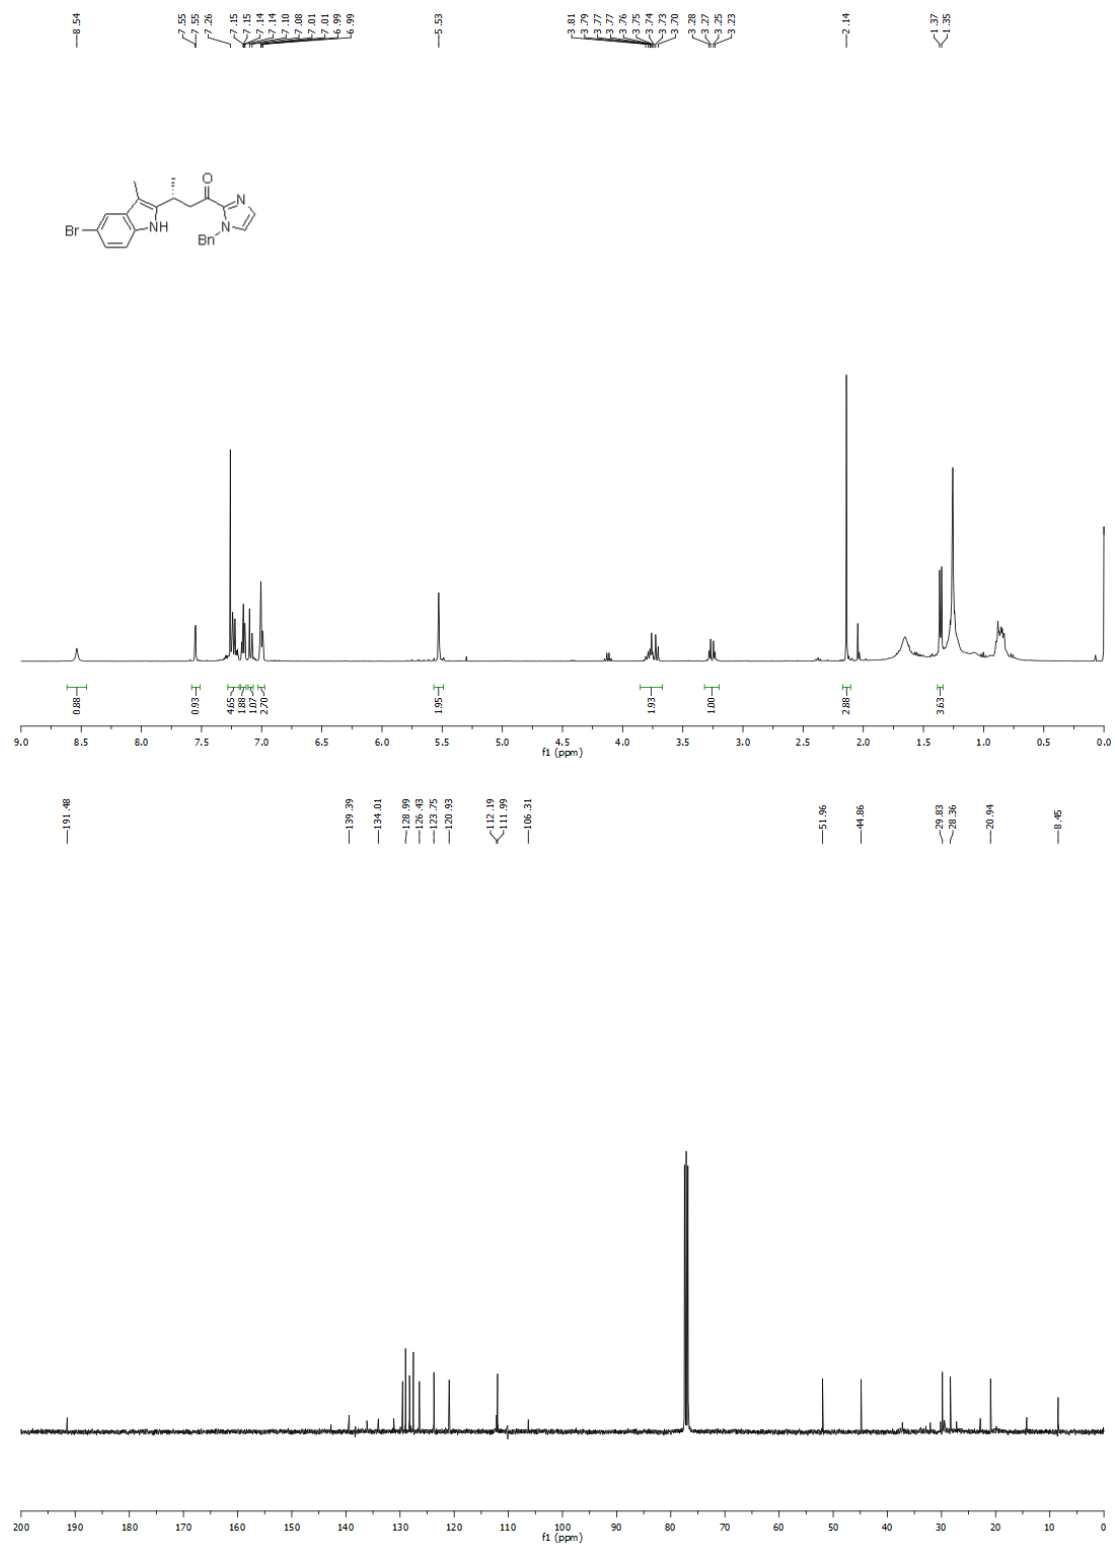

(R)-1-(1-Benzyl-1H-imidazolyl)-3-(3,7-dimethyl-1H-indol-2-yl)butan-1-one (**6j**)

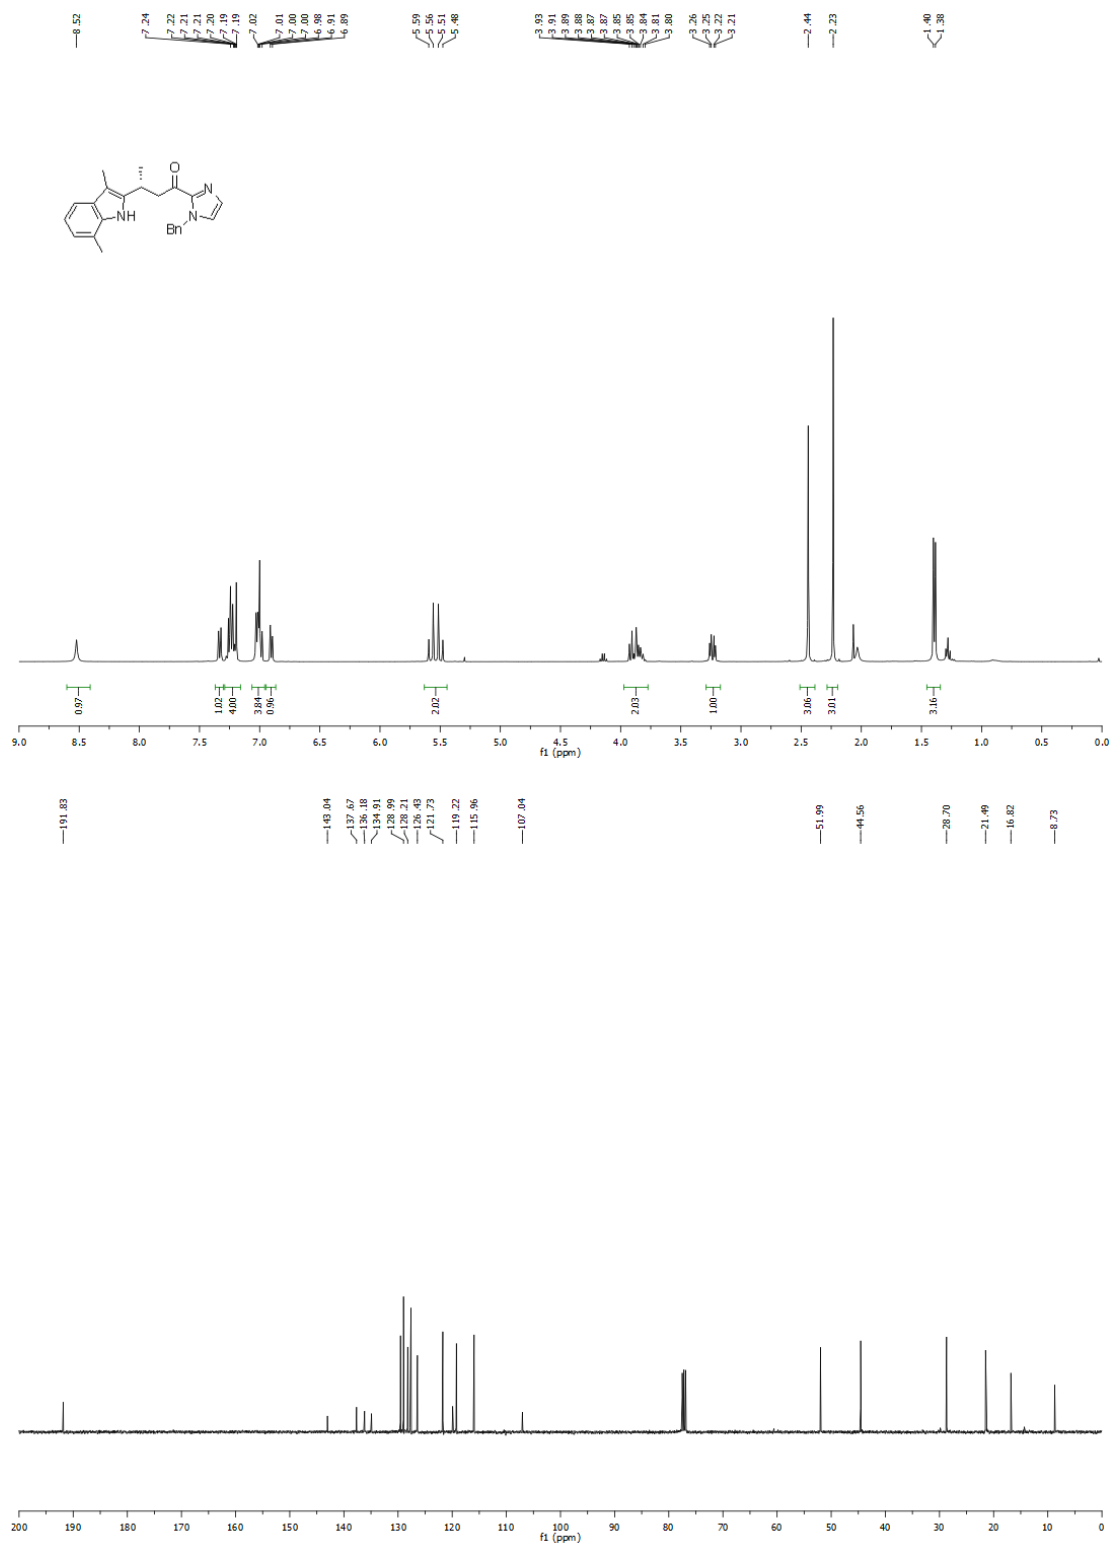

(*R*)-1-(1-Benzyl-1*H*-imidazolyl)-3-(1,3-dimethyl-1*H*-indol-2-yl) butan-1-one (**6k**)

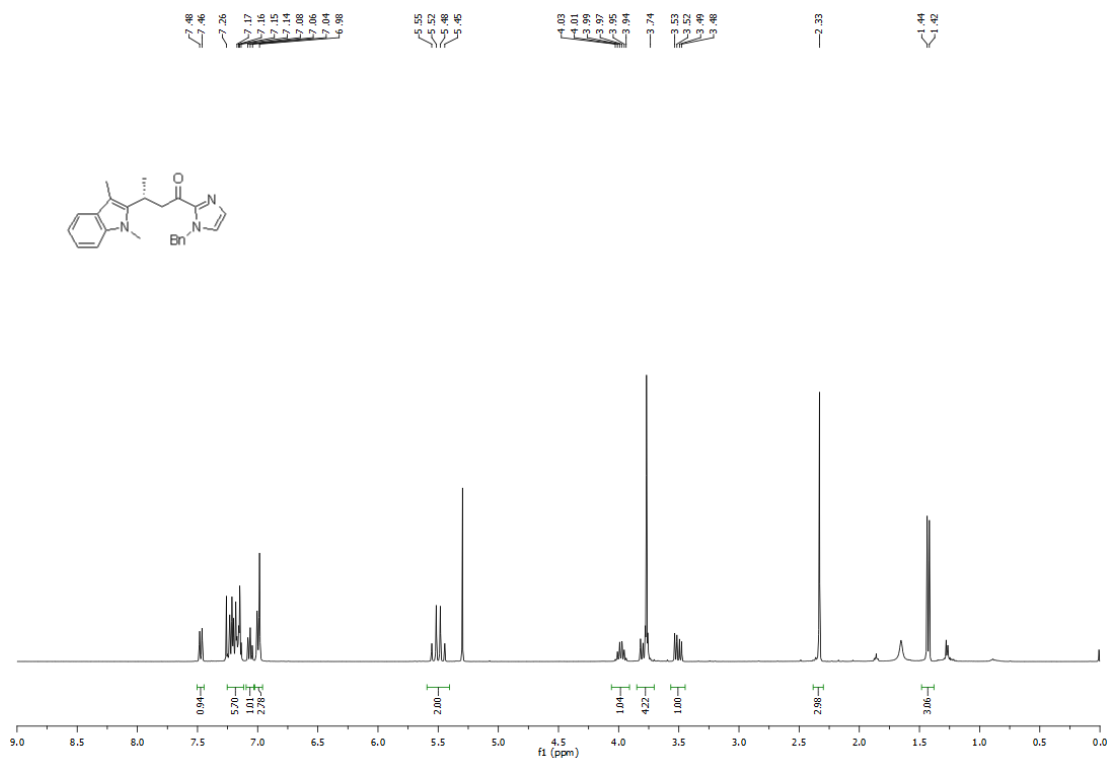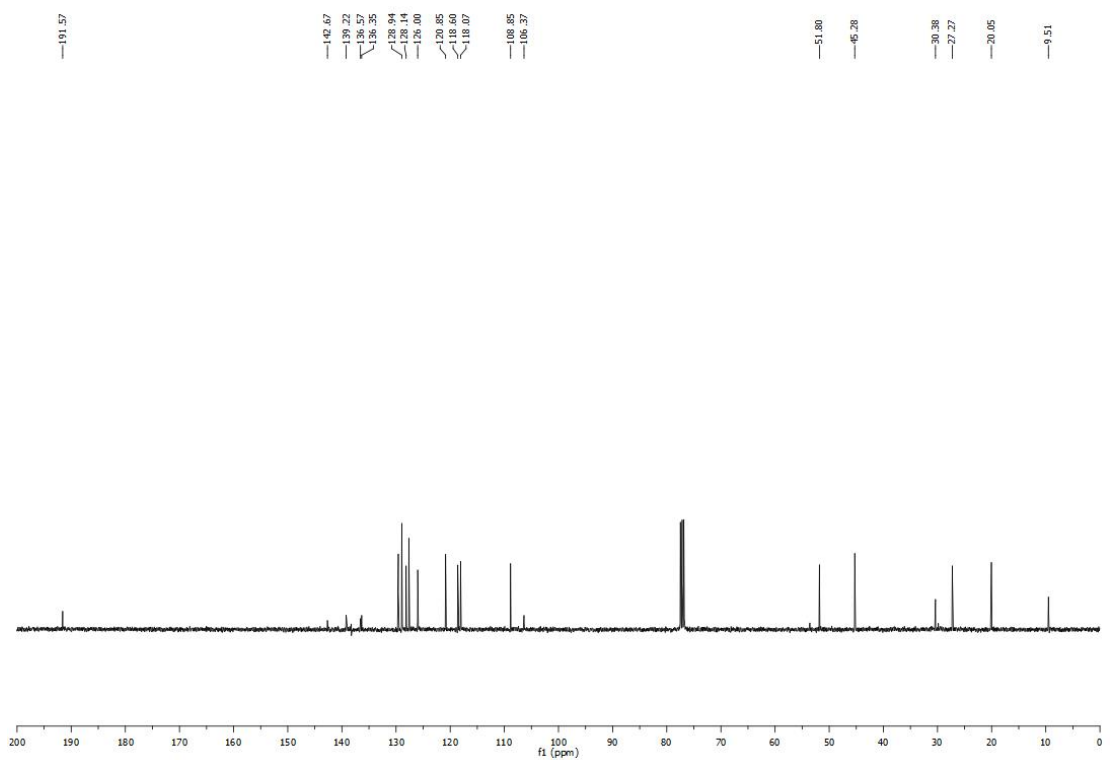

(*R*)-1-(1-Benzyl-1*H*-imidazolyl)-3-(3-ethyl-1-methyl-1*H*-indolyl) butan-1-one (**61**)

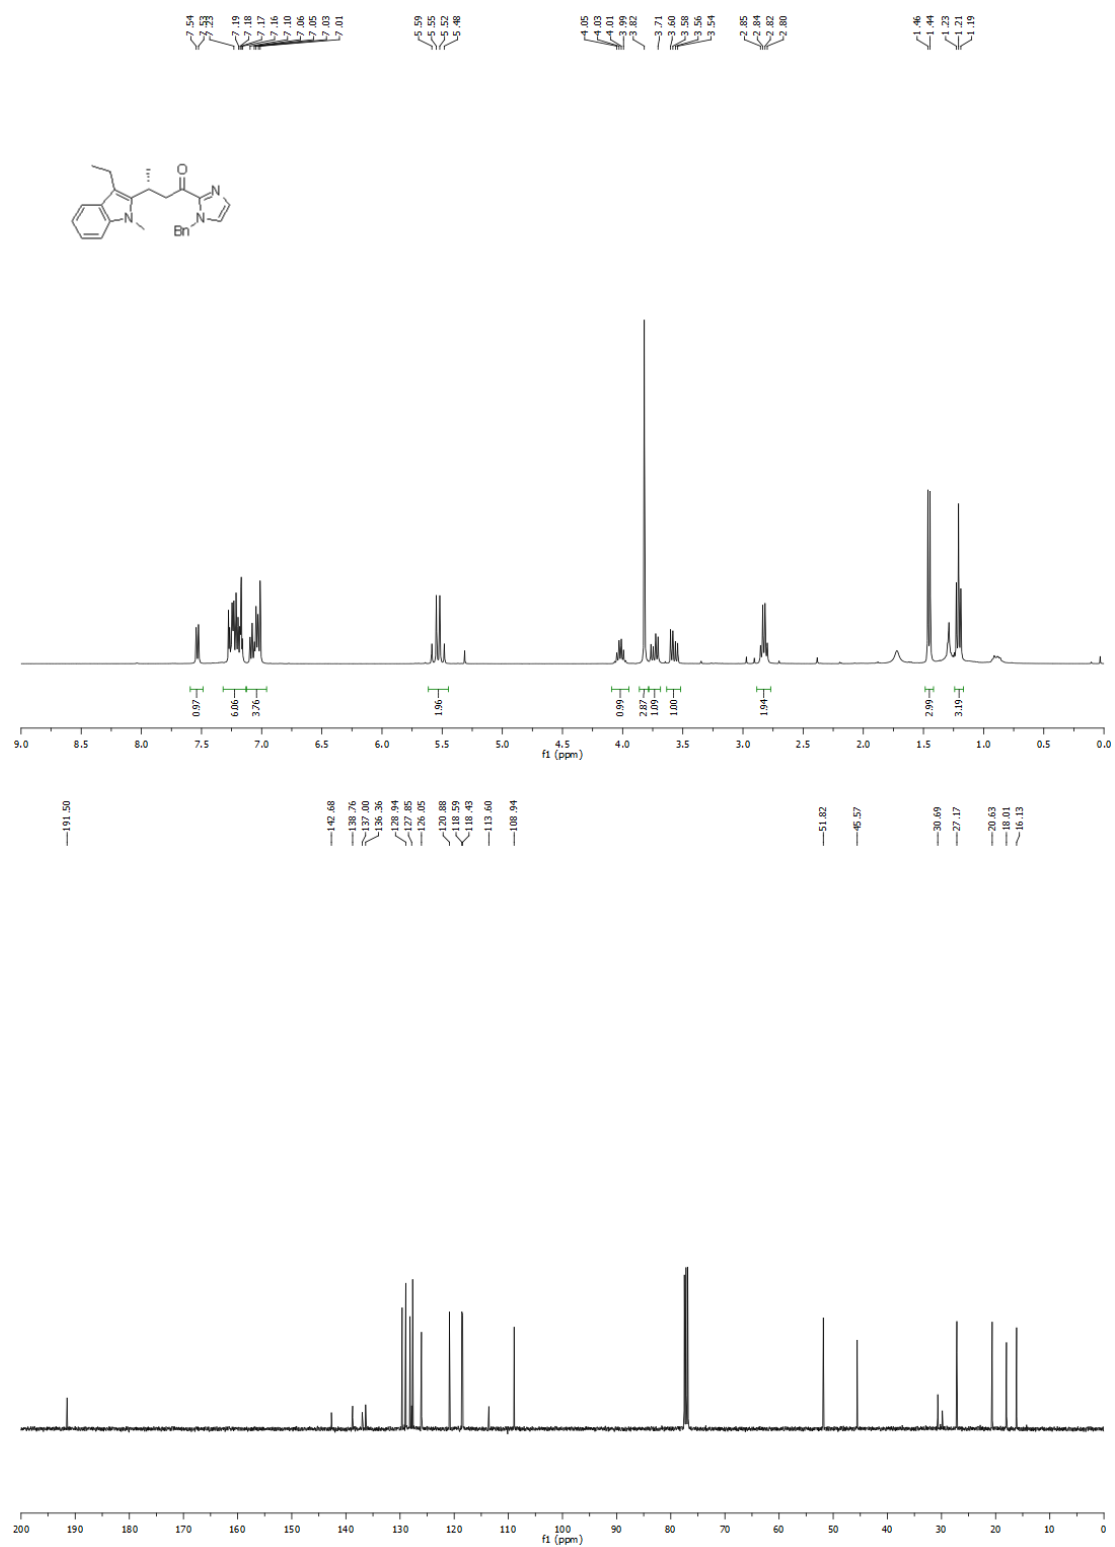

(R)-1-(1-Benzyl-1H-imidazol-2-yl)-3-(3-ethyl-1H-indol-1-yl)butan-1-one (7a)

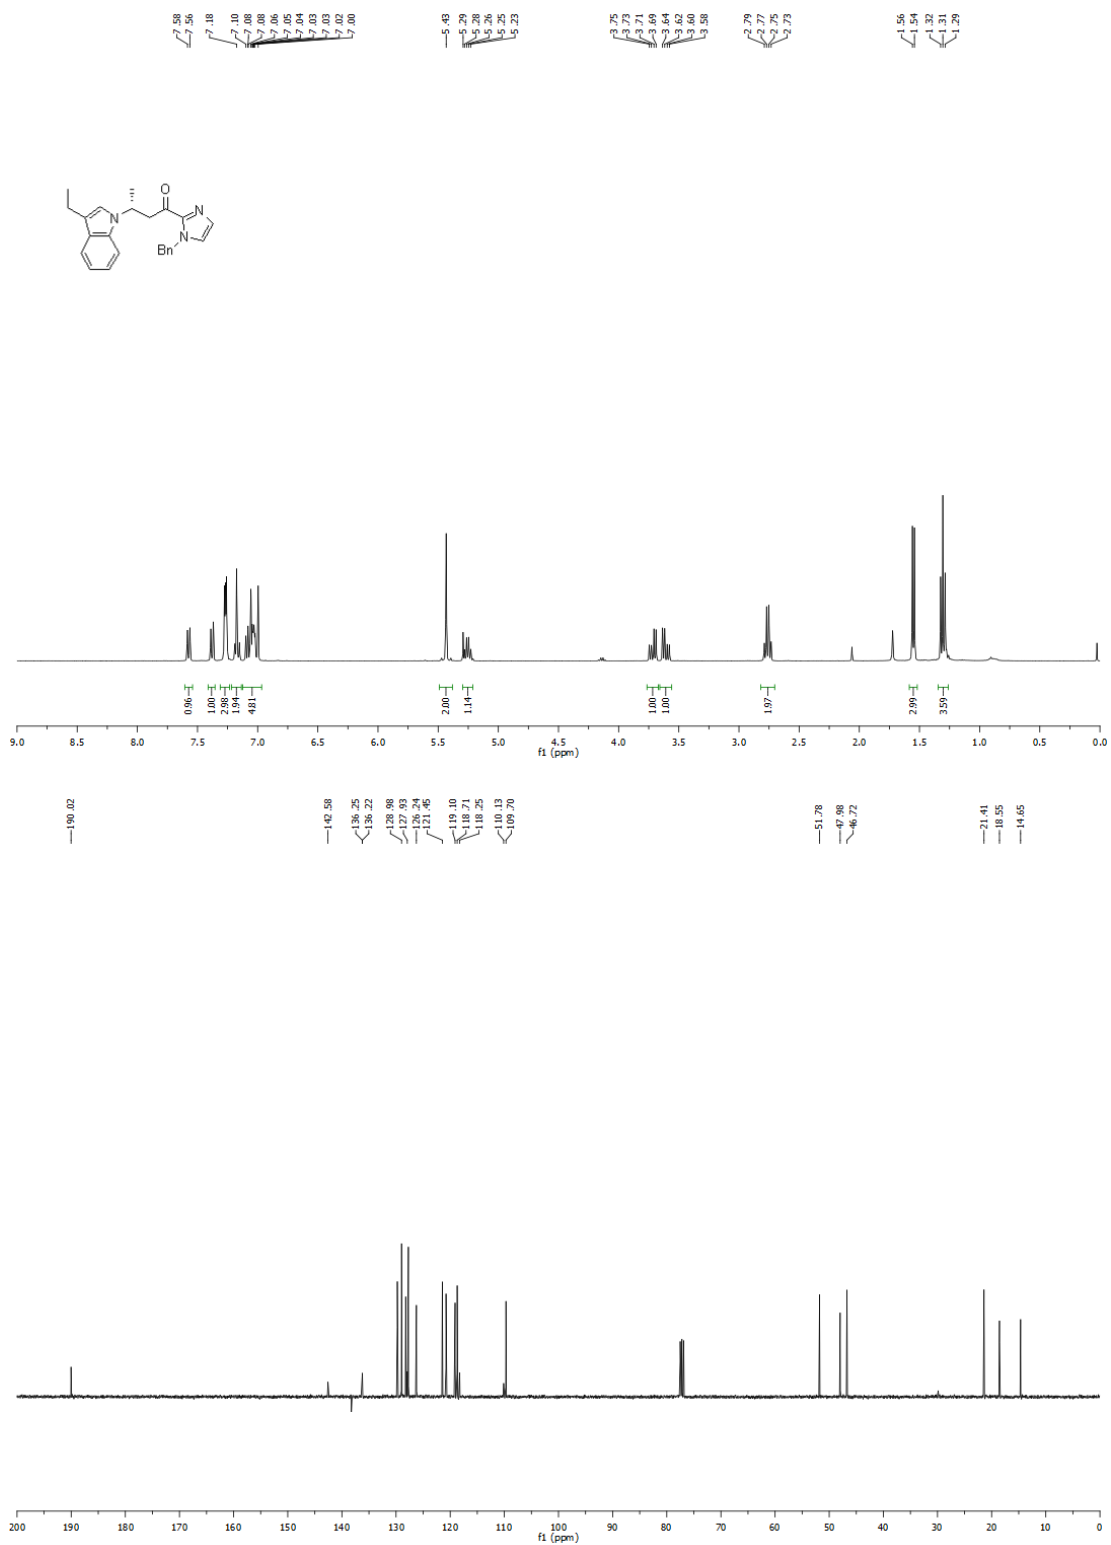



(R)-1-(1-Benzyl-1H-imidazol-2-yl)-3-(3-propyl-1H-indol-1-yl)butan-1-one (7b)

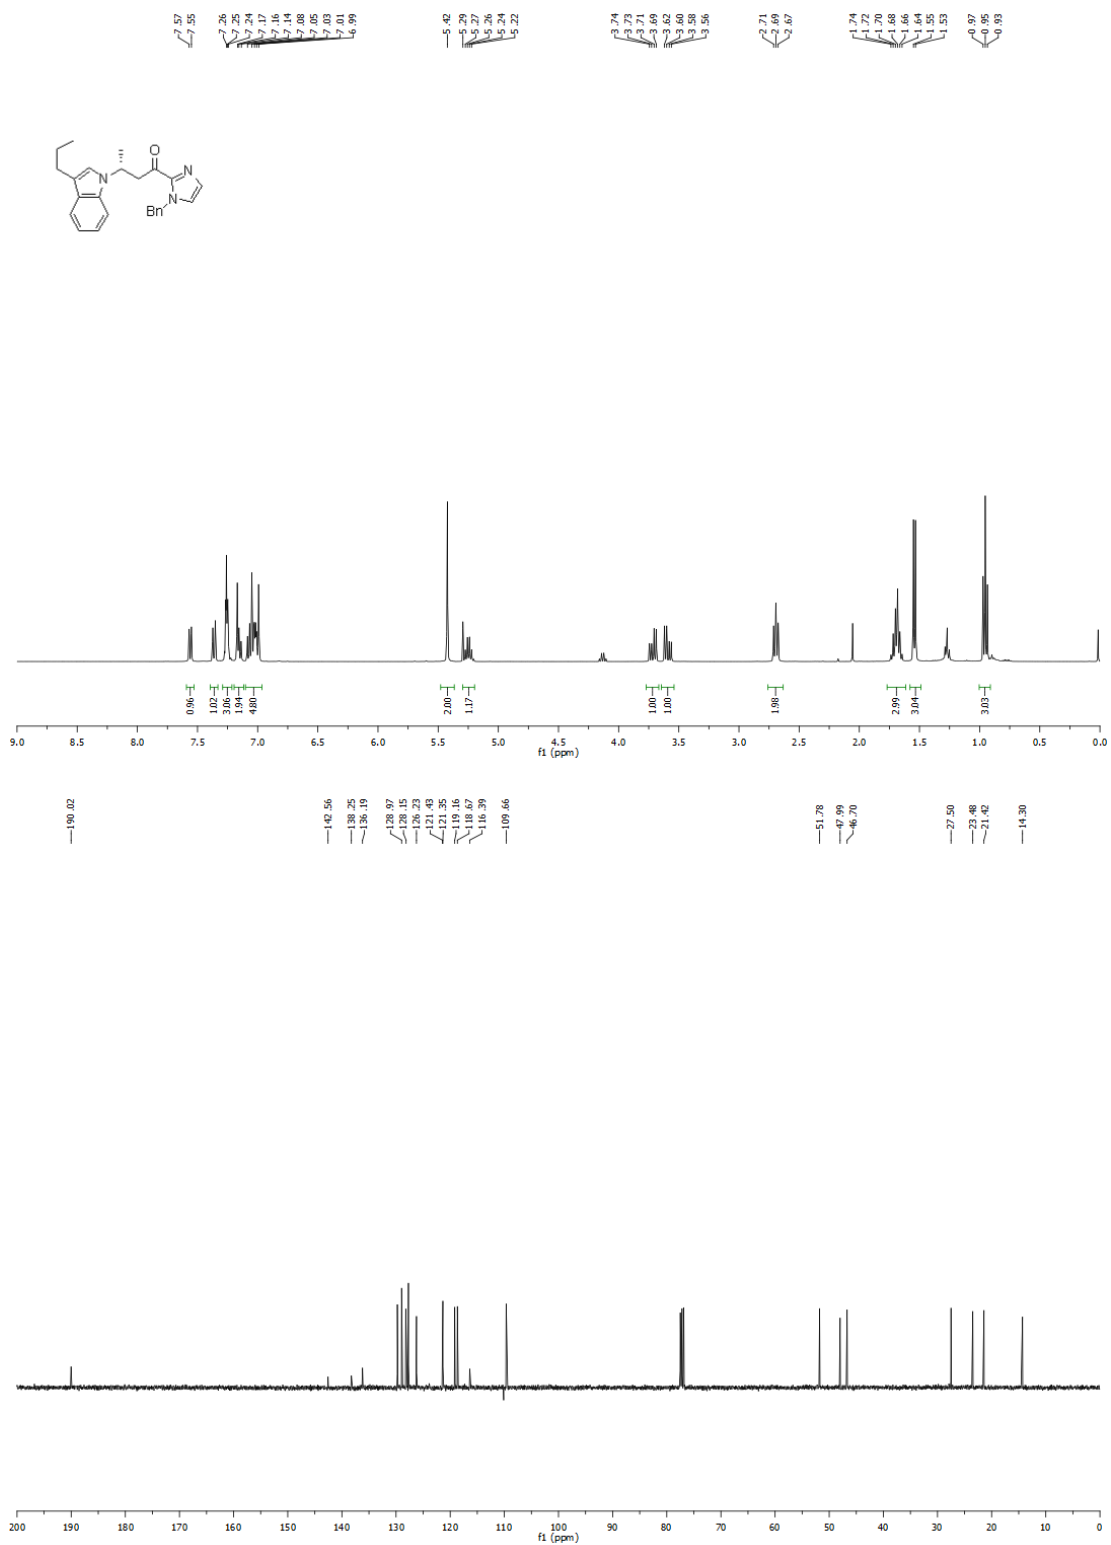

(R)-1-(1-Benzyl-1H-imidazol-2-yl)-3-(3-propyl-1H-indolyl)butan-1-one (7b')

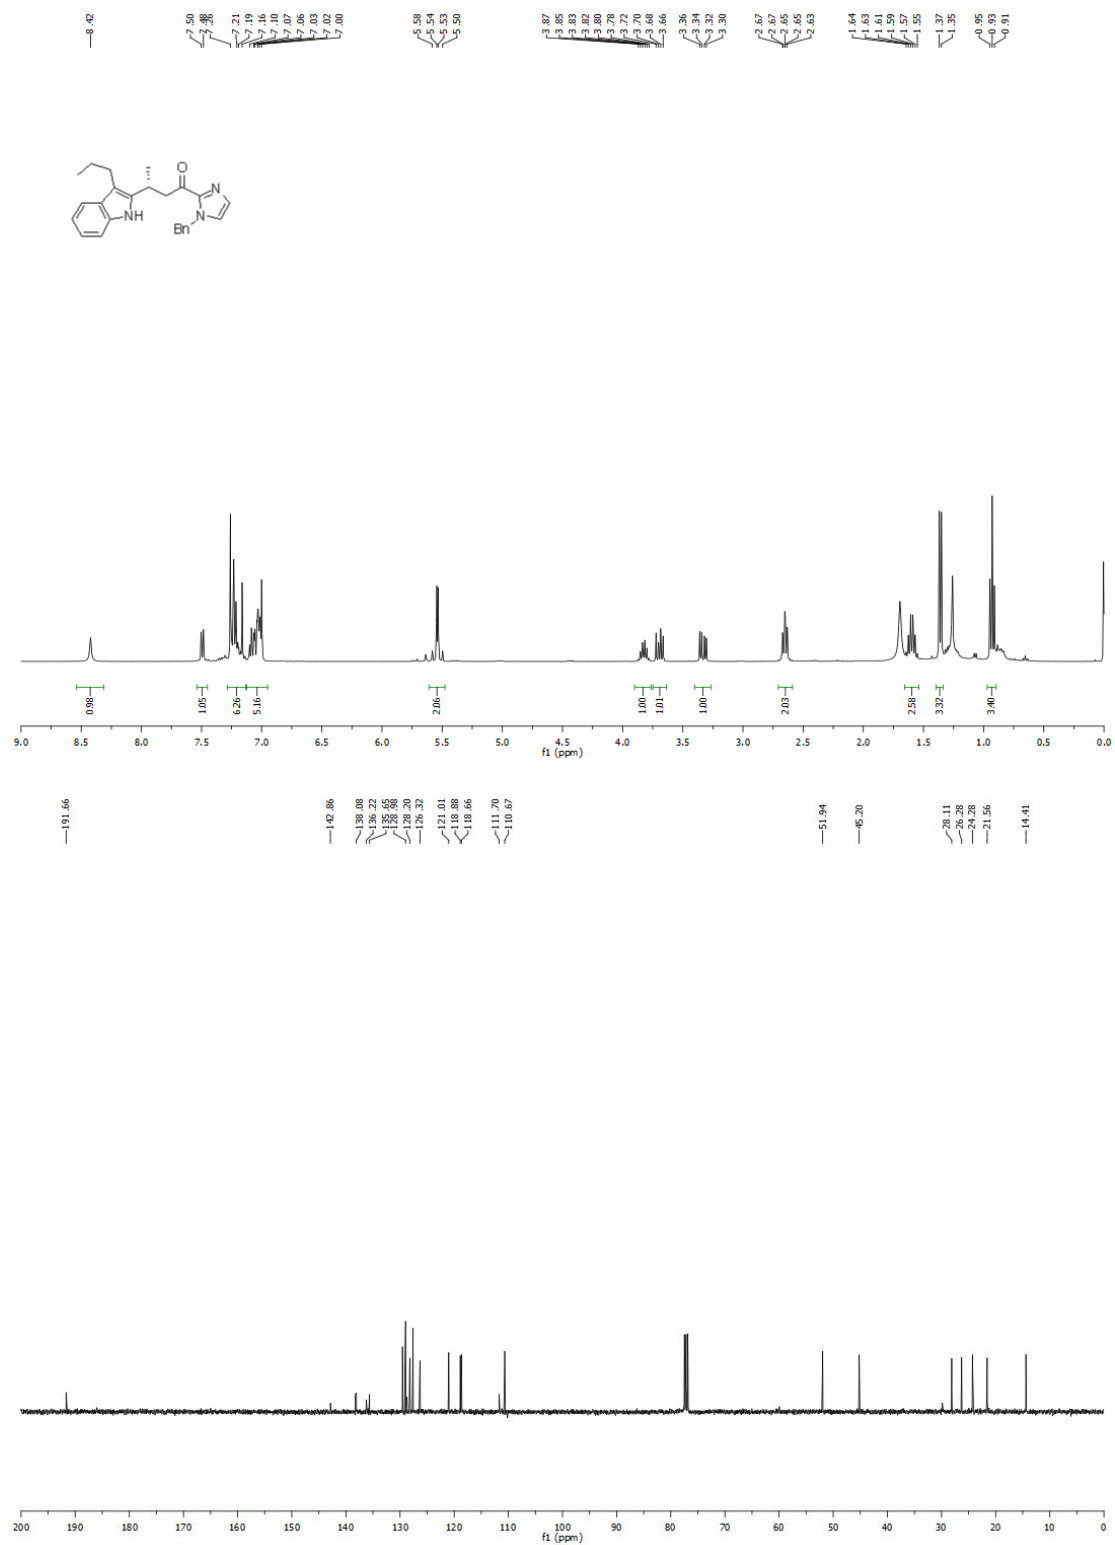

(*R*)-Methyl-2-(1-(4-(1-benzyl-1*H*-imidazol-2-yl)-4-oxobutan-2-yl)-1*H*-indol-3-yl) acetate (**7c**)

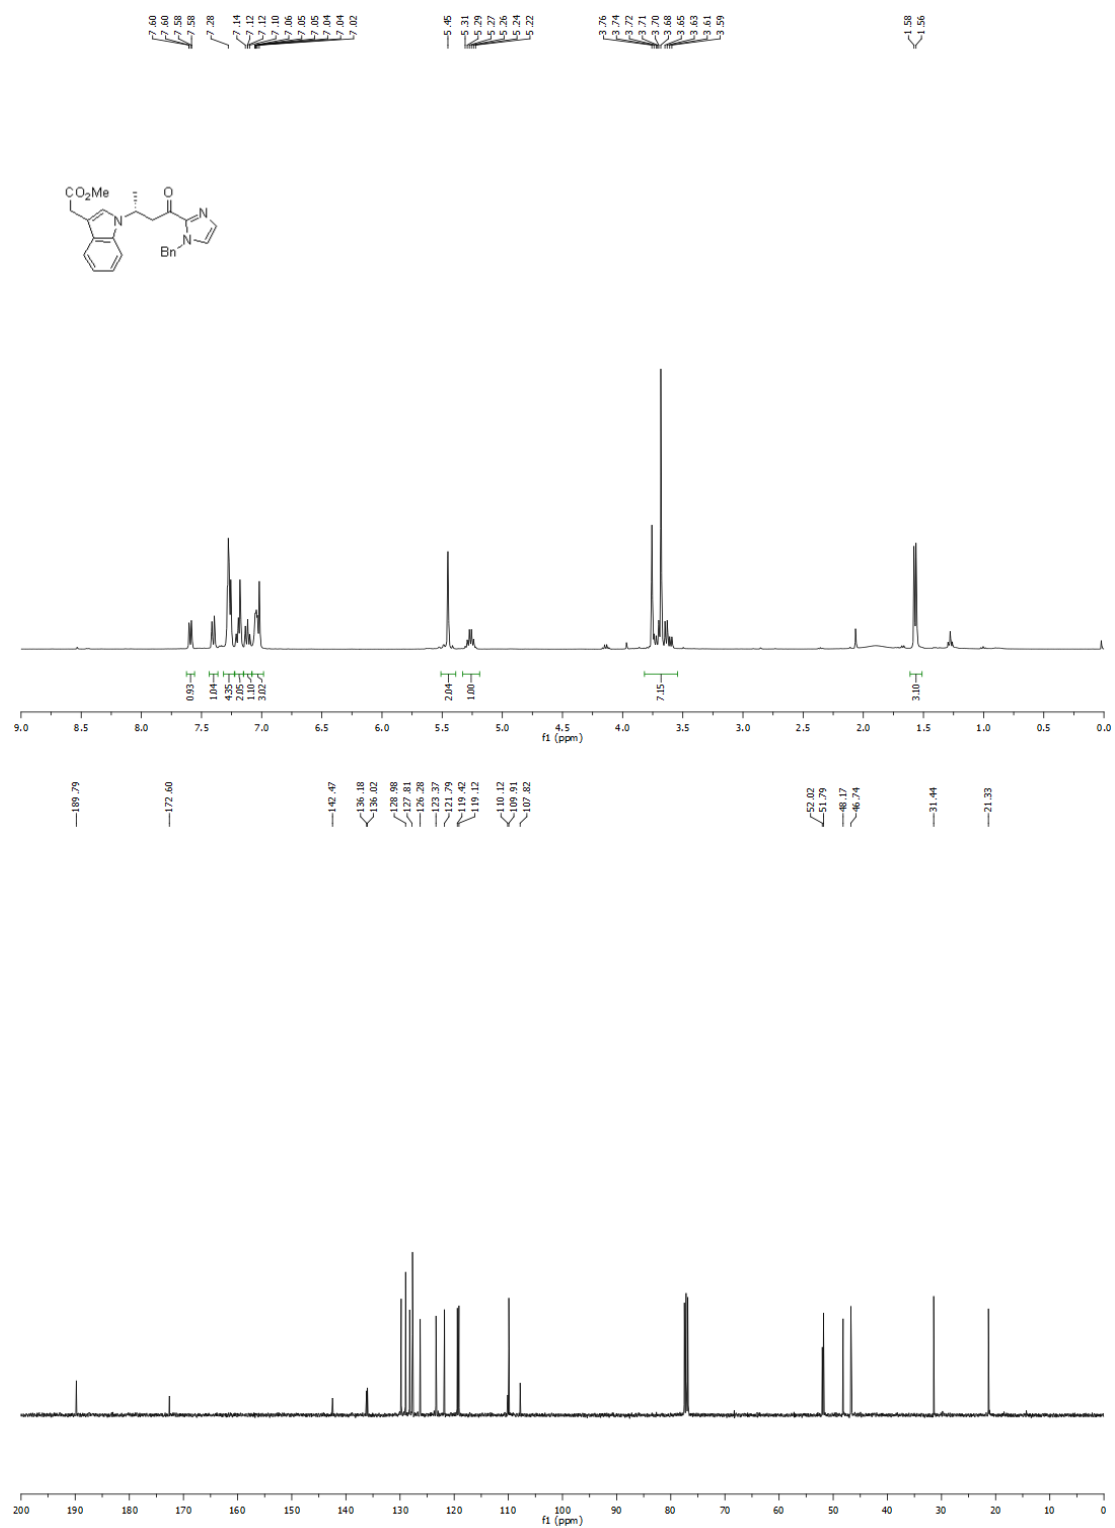

(*R*)-1-(4-(1-Benzyl-1*H*-imidazolyl)-4-oxobutan-2-yl)-1*H*-indol-3-yl acetate (**7d**)

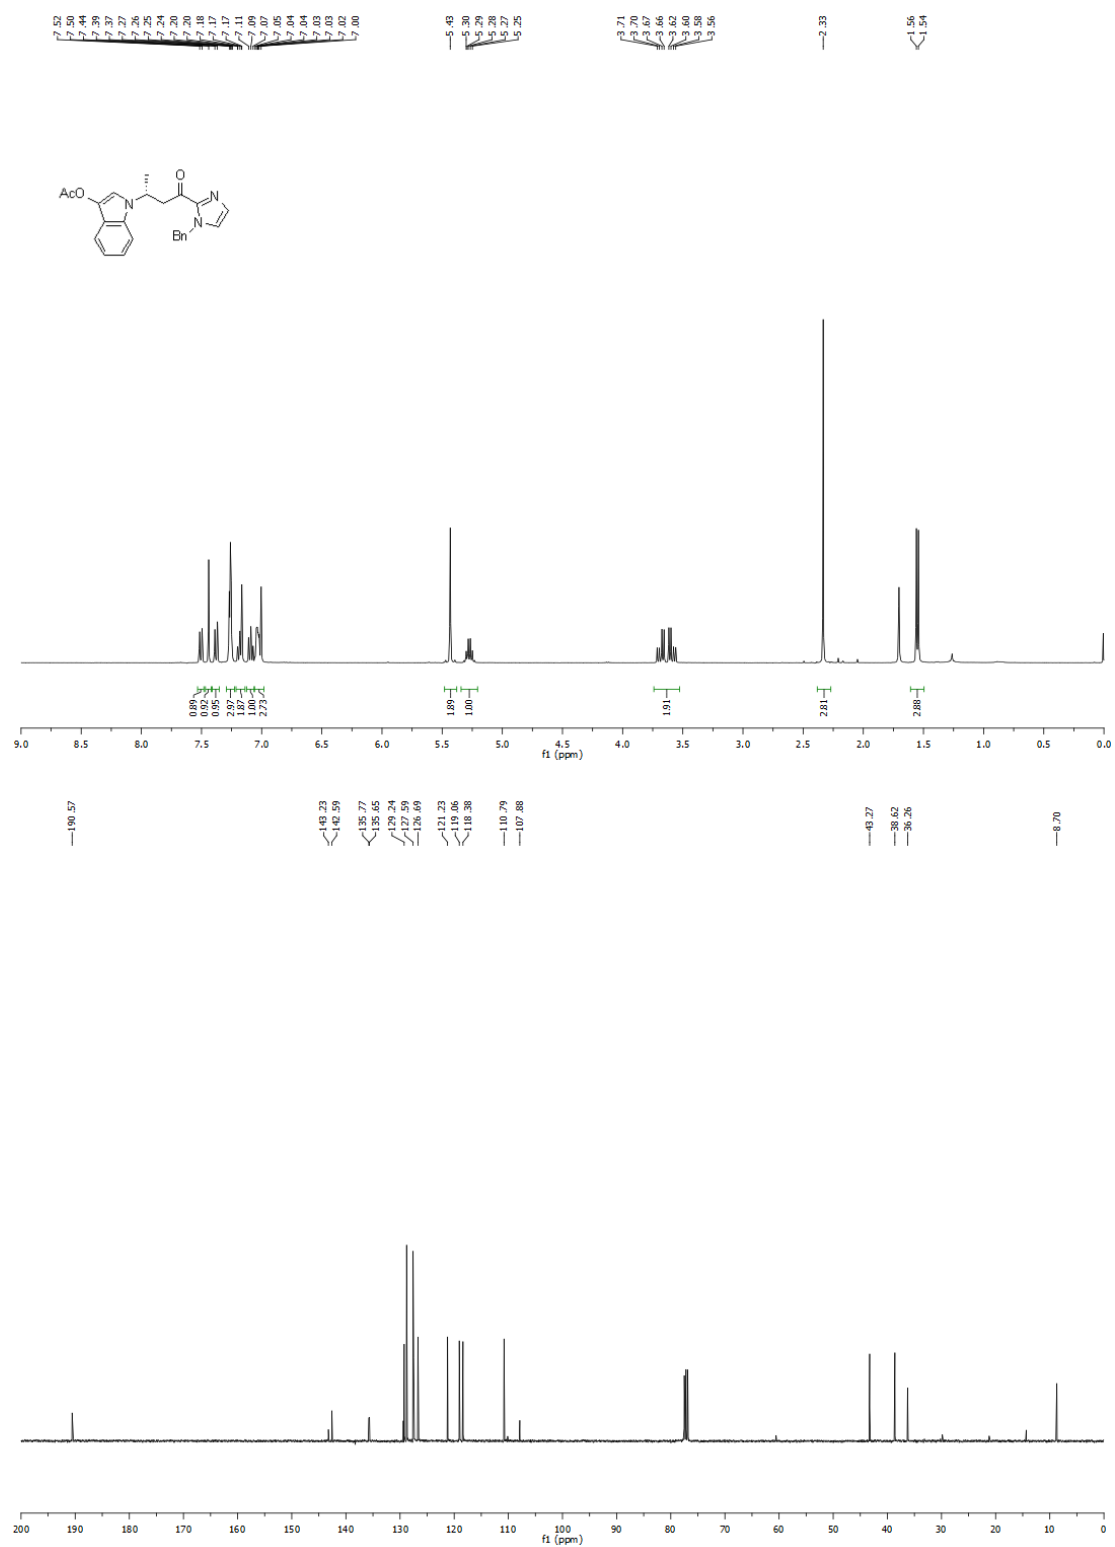

(*R*)-(Benzyl-1*H*-imidazolyl)-3-(5-methoxy-3-methyl-1*H*-indolyl) butan-1-one (**7e**)

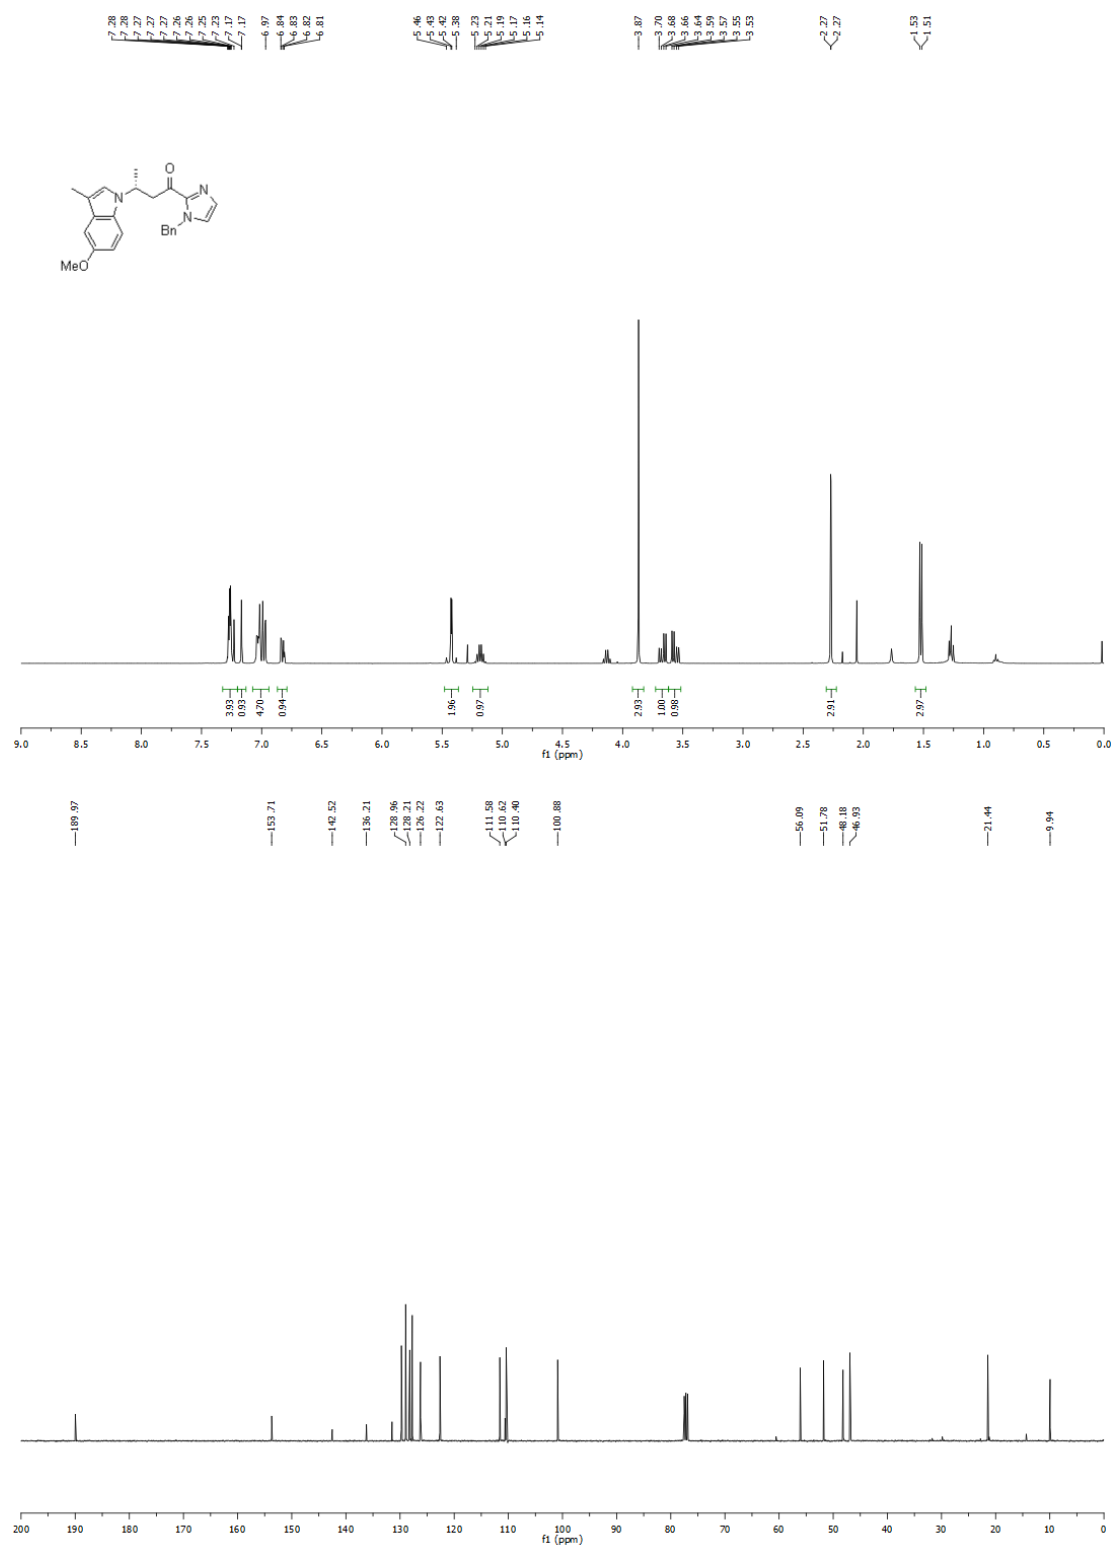

(*R*)-1-(1-Benzyl-1*H*-imidazol-2-yl)-3-(3-(but-3-en-1-yl)-5-methoxy-1*H*-indol-1-yl) butan-1-one  
**(7f)**

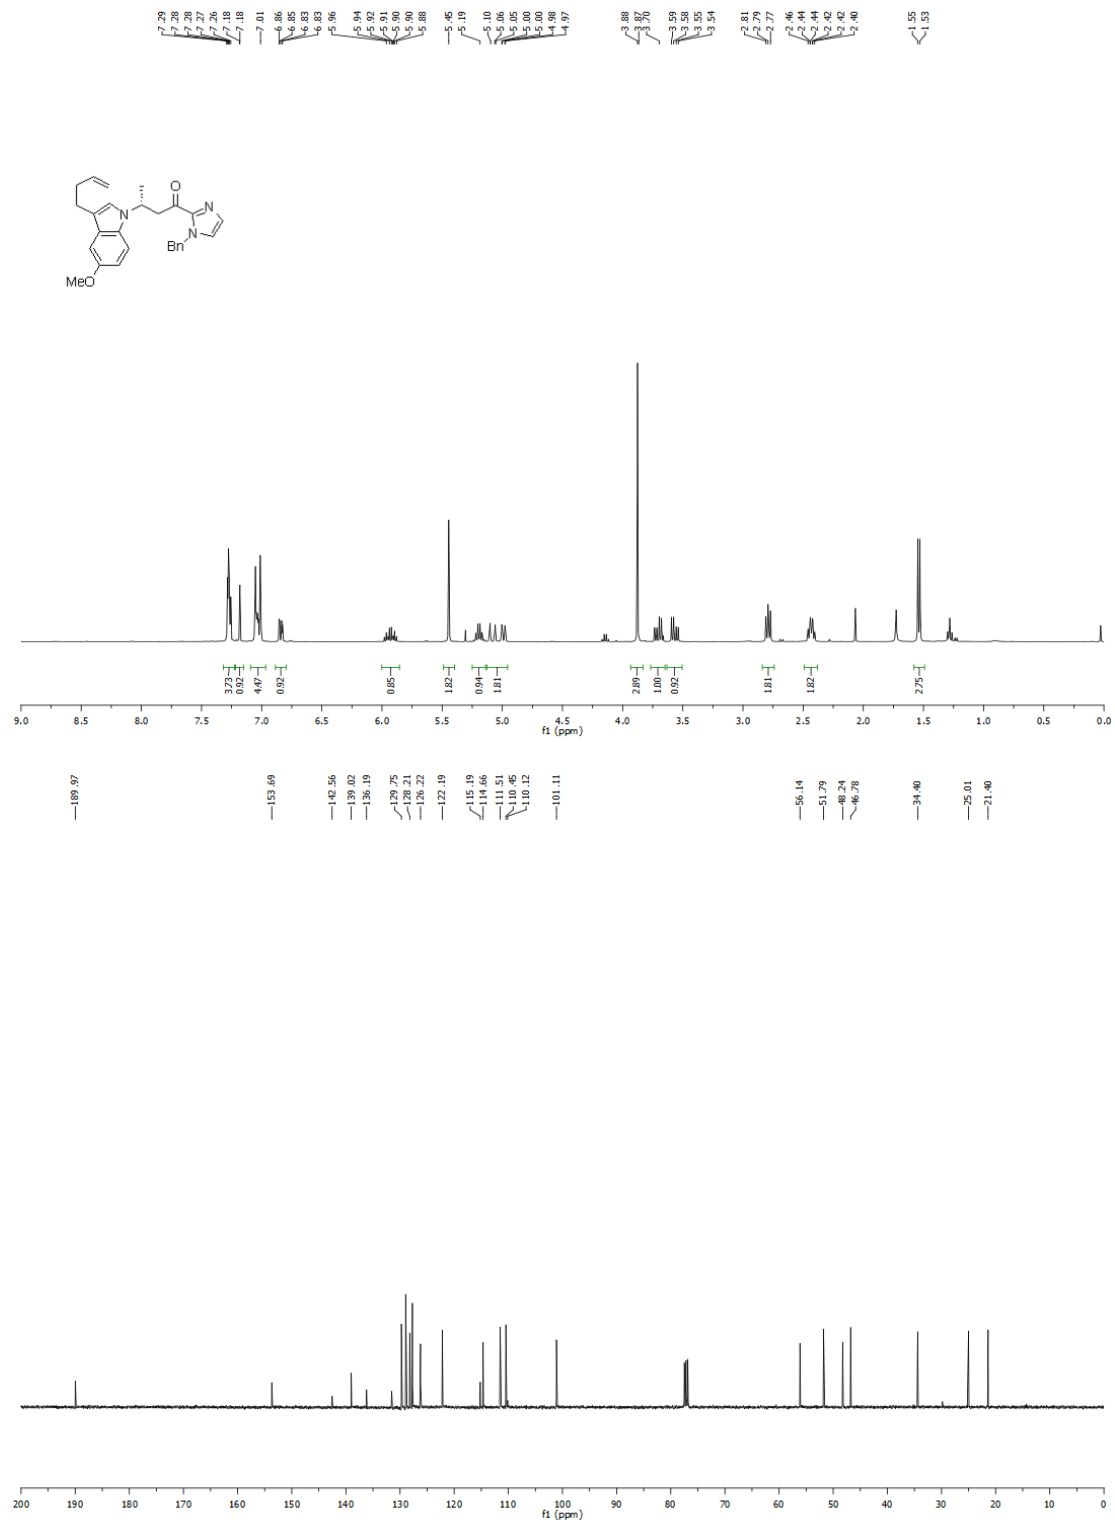

(R)-(1-Benzyl-1H-imidazolyl)-3-(5-bromo-3-propyl-1H-indolyl)butan-1-one (7g)

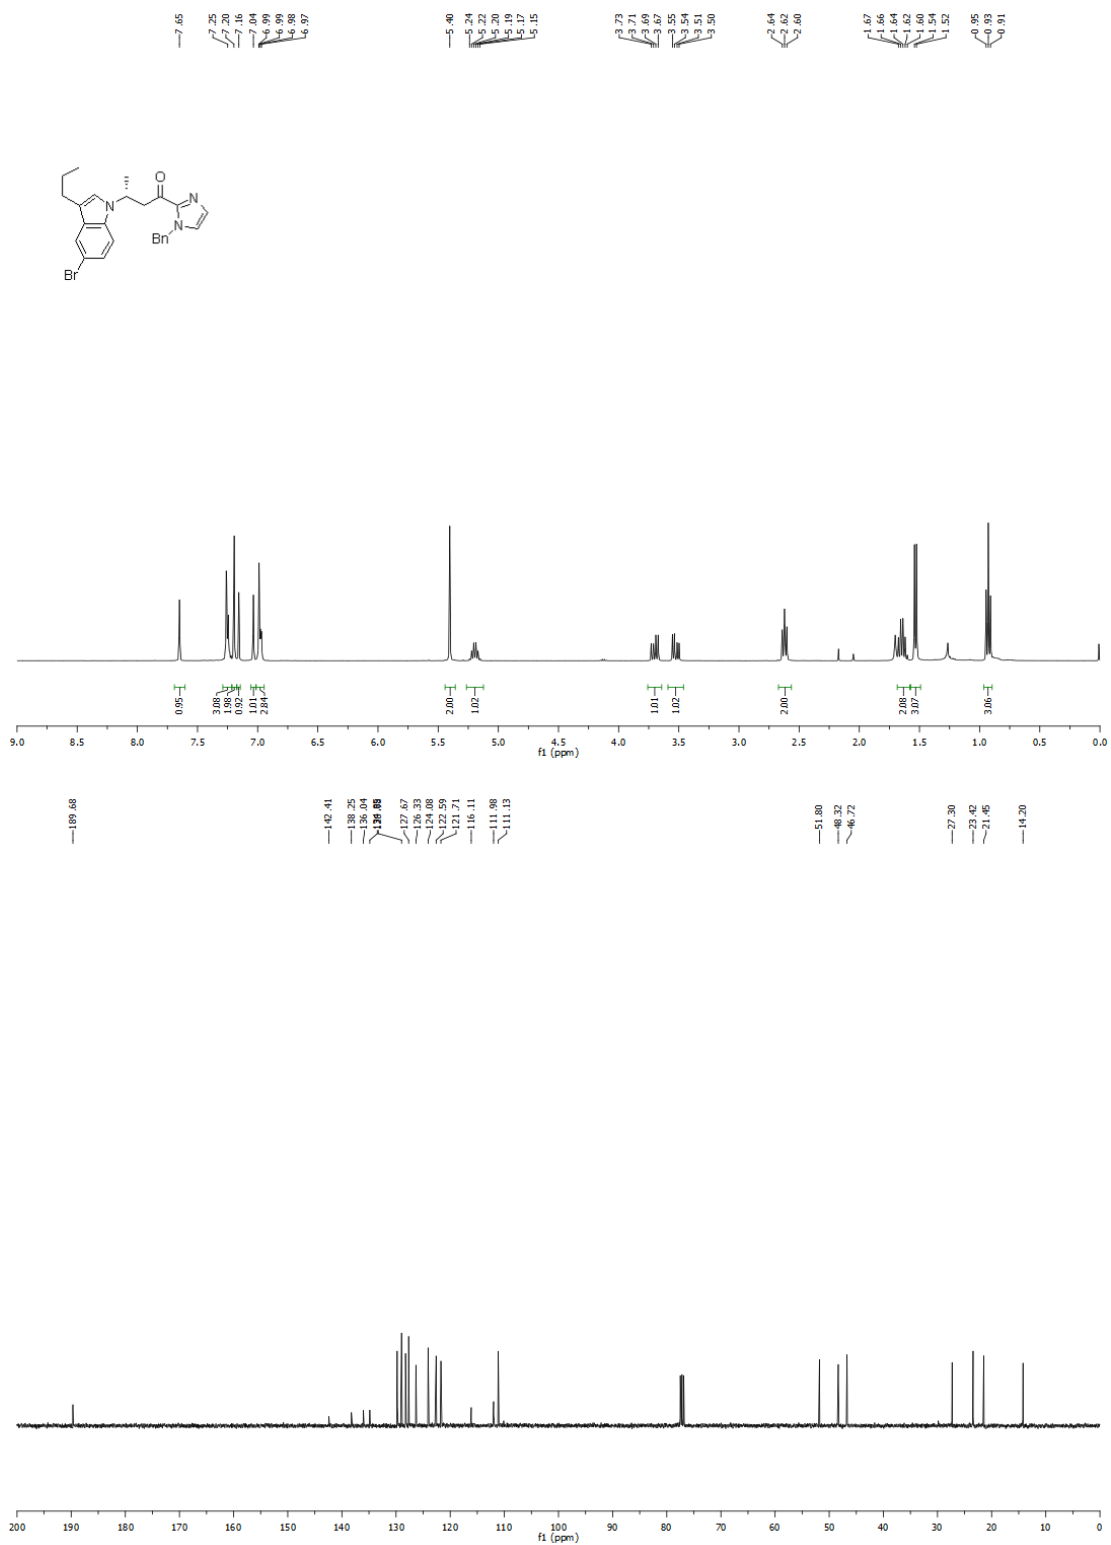

(*R*)-1-(1-Benzyl-1*H*-imidazol-2-yl)-3-(5-methoxy-3-phenethyl-1*H*-indol-1-yl)butan-1-one (**7h**)

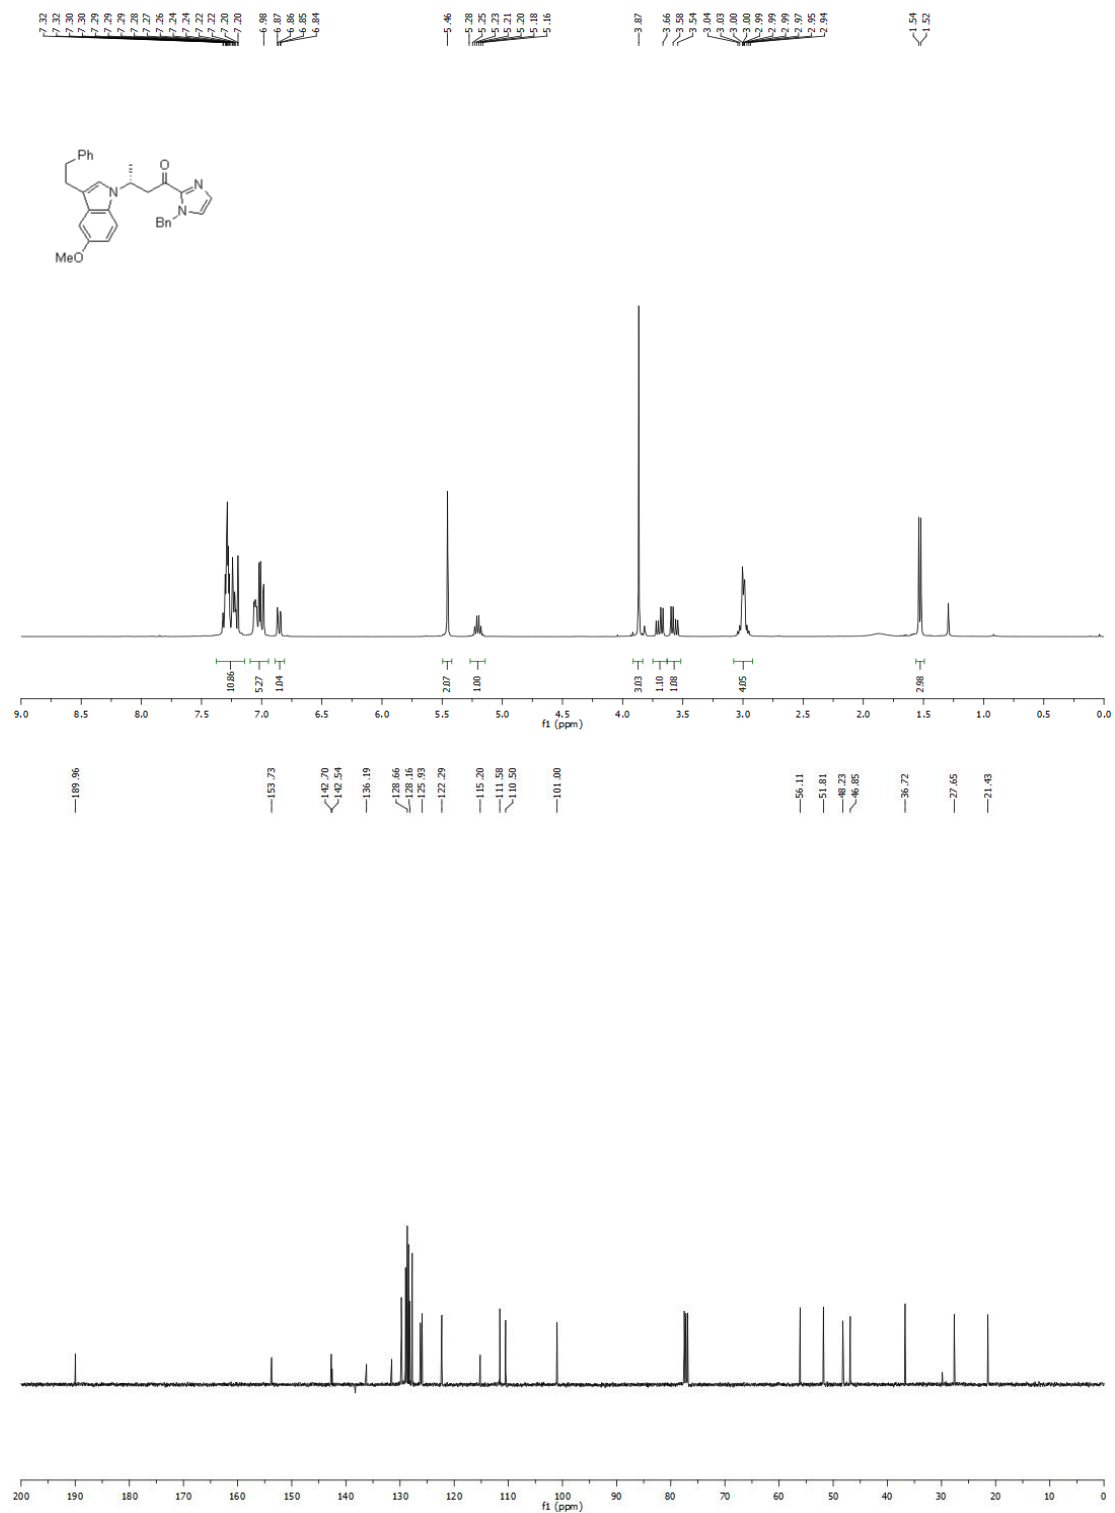



(R)-1-(1-Benzyl-1H-imidazol-2-yl)-3-(2,3-dimethyl-1H-indolyl)butan-1-one (7i)

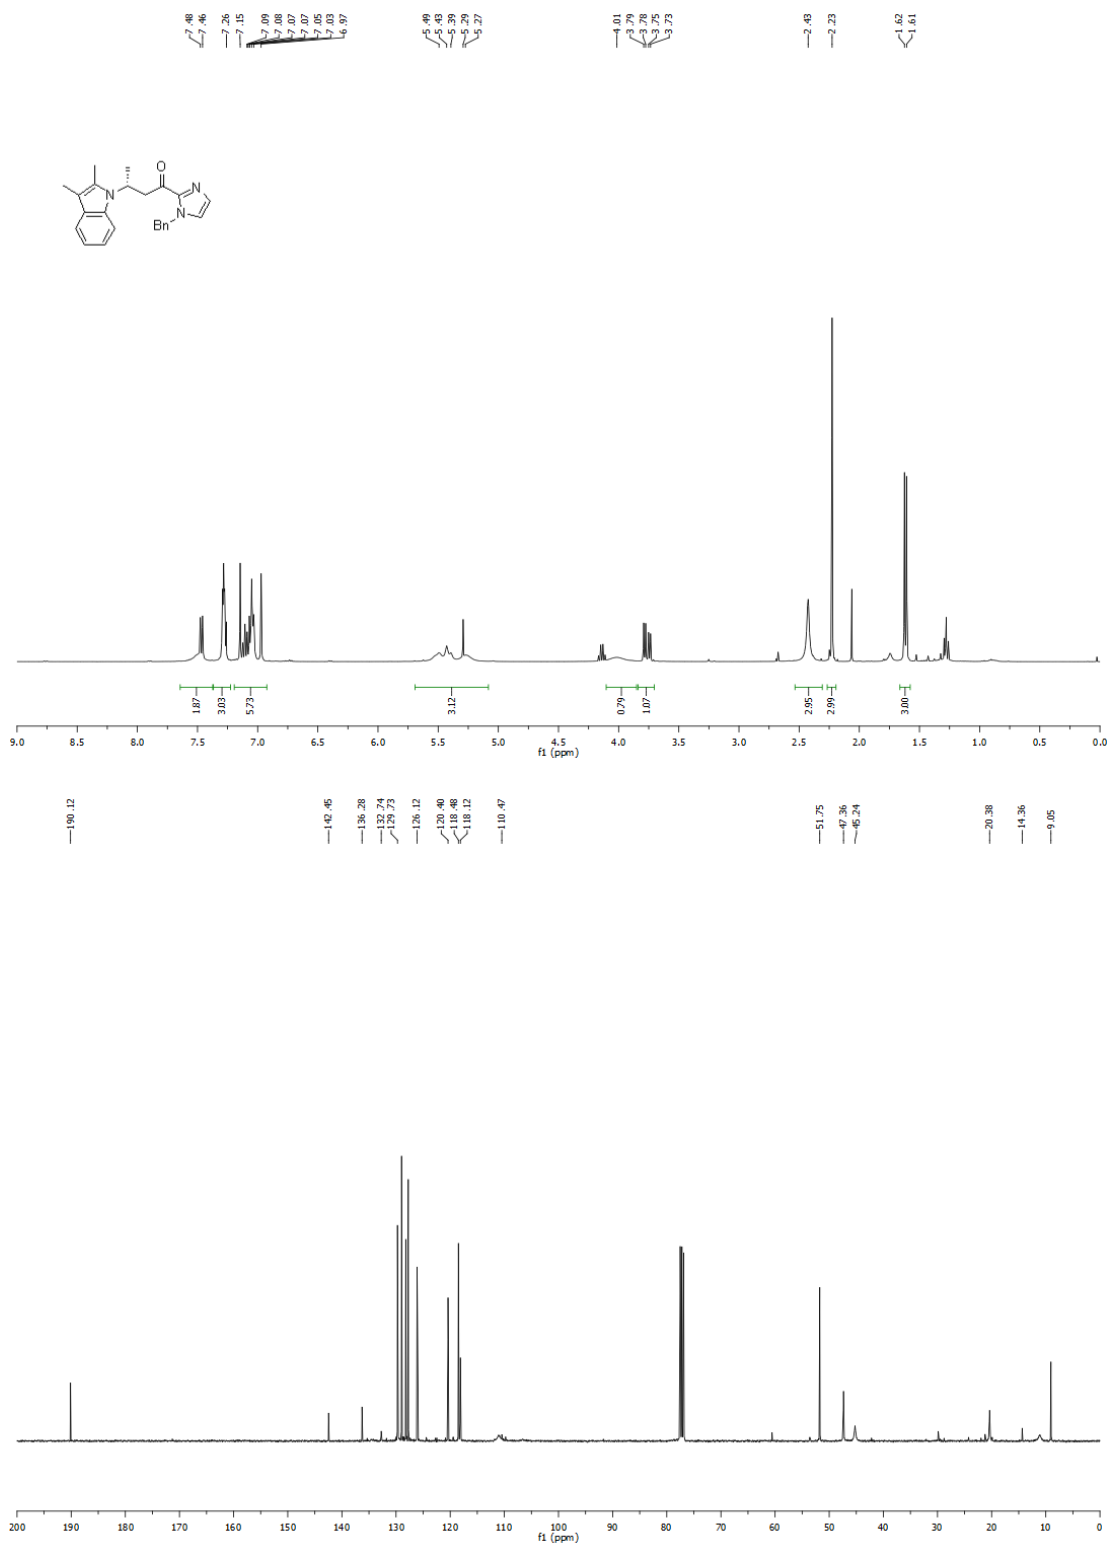

(R)-1-(1-Methyl-1H-imidazol-2-yl)-3-(1-phenyl-1H-pyrrol-2-yl) butan-1-one (**9a**)

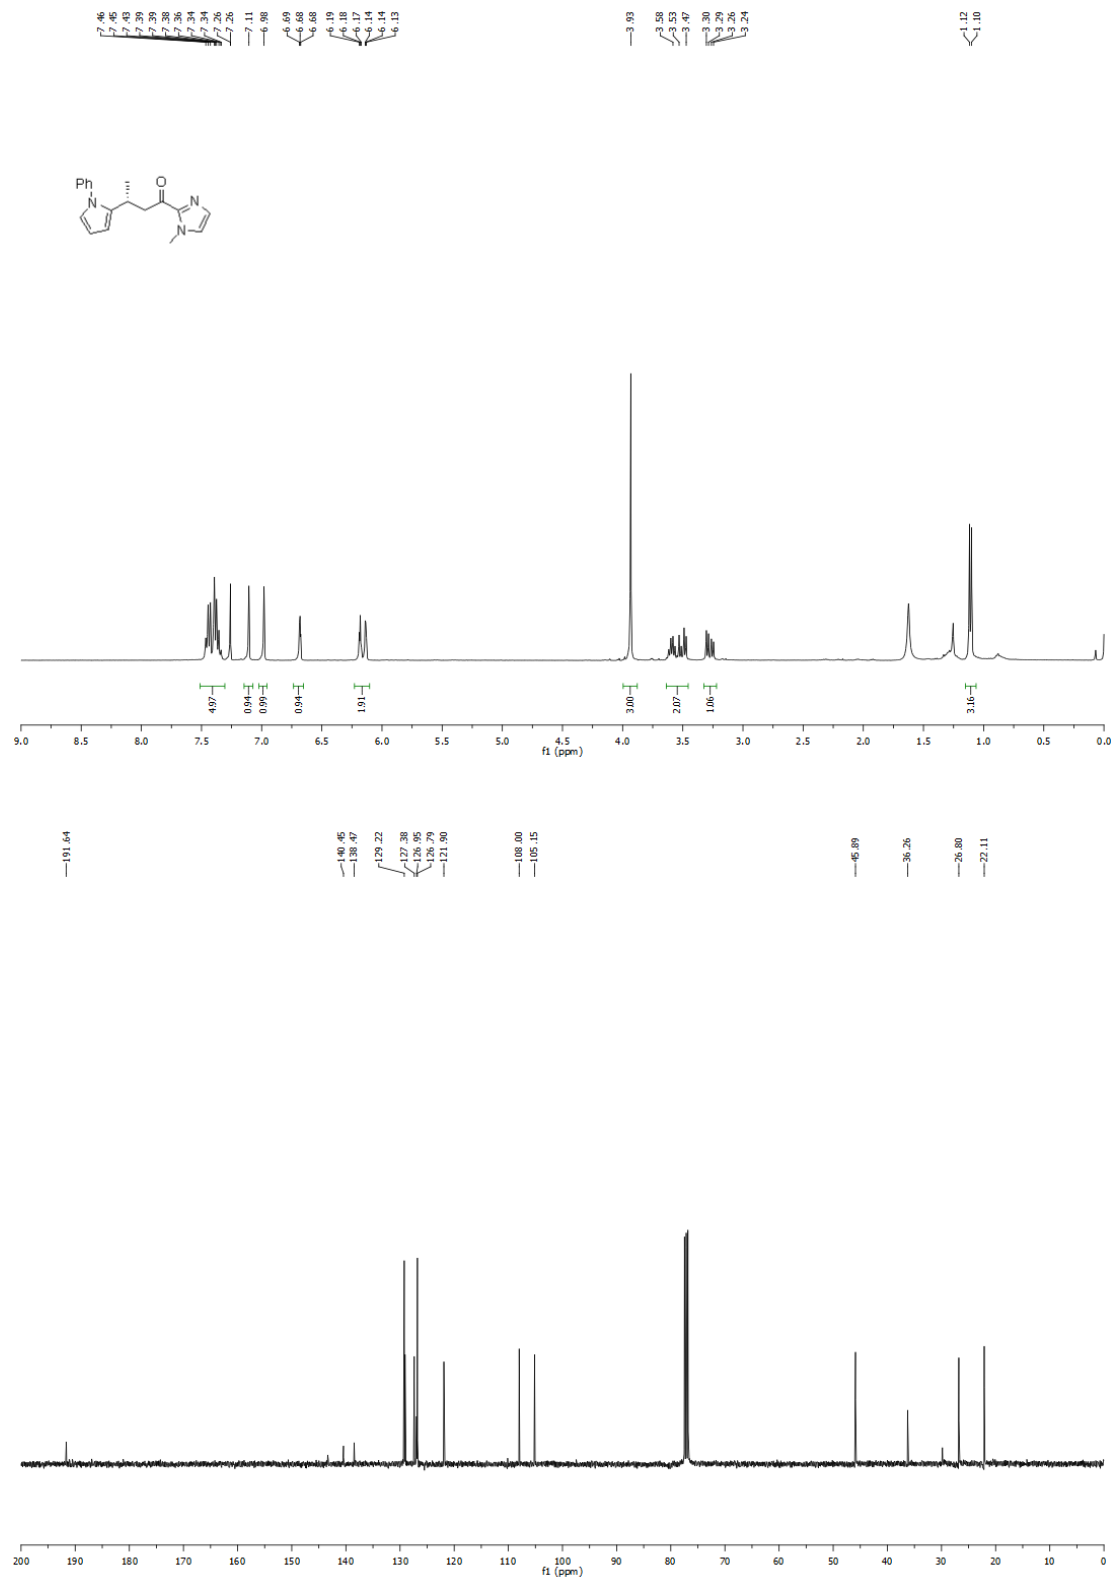

(*R*)-1-(1-Benzyl-1*H*-imidazol-2-yl)-3-(1-phenyl-1*H*-pyrrol-2-yl) butanone (**9b**)

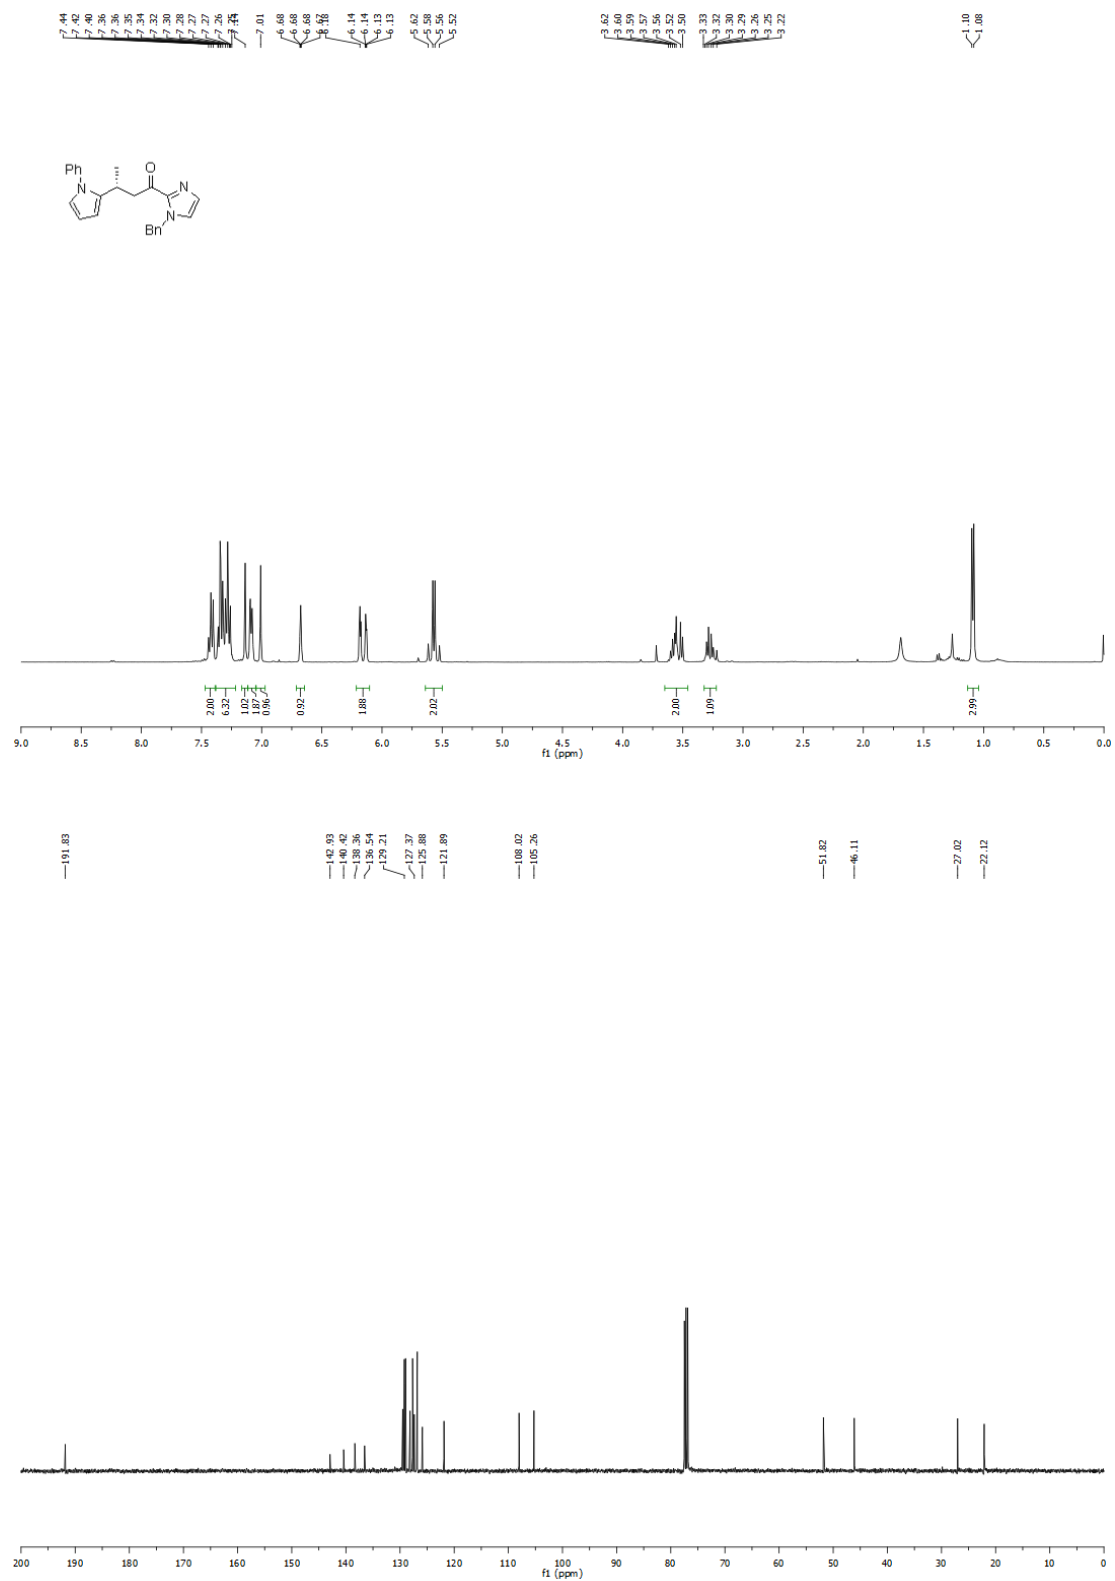

(*R*)-1-(1-Benzyl-1-imidazol-2-yl)-3-(2,5-dimethyl-1*H*-pyrrol-3-yl) butan-1-one (**9c**)

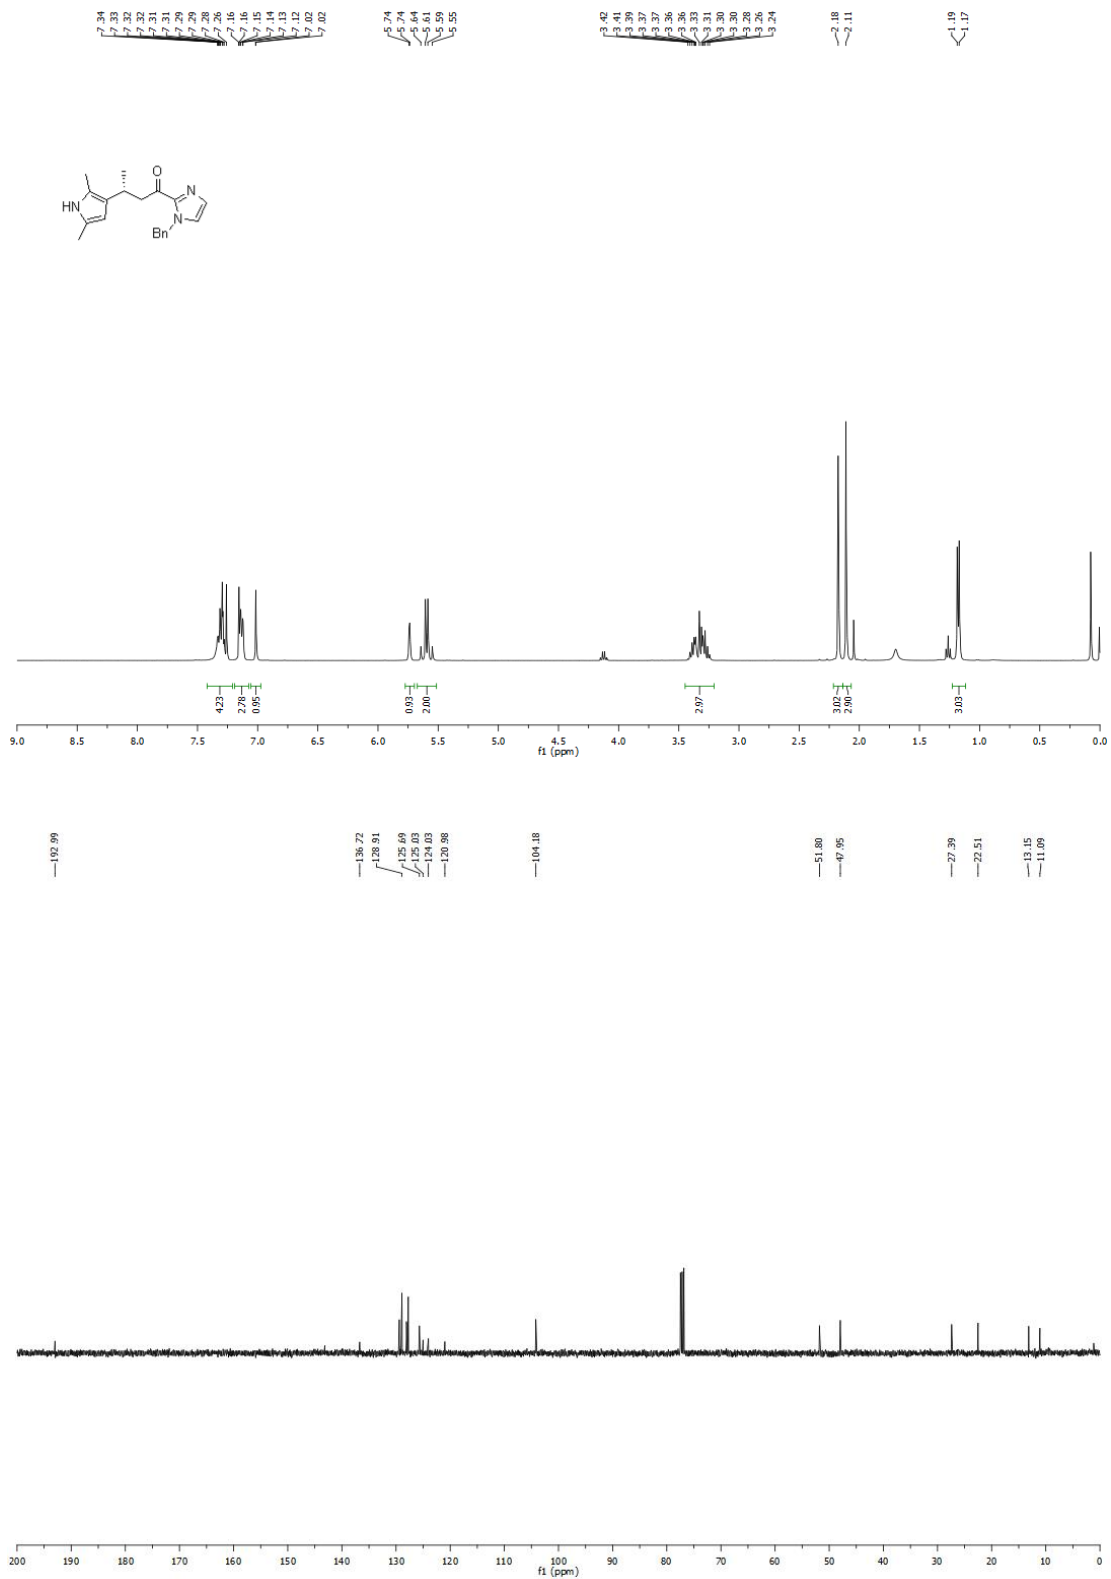

(R)-1-(1-Benzyl-imidazol-2-yl)-3-(1,2,5-trimethyl-pyrrol-3-yl) butan-1-one (**9d**)

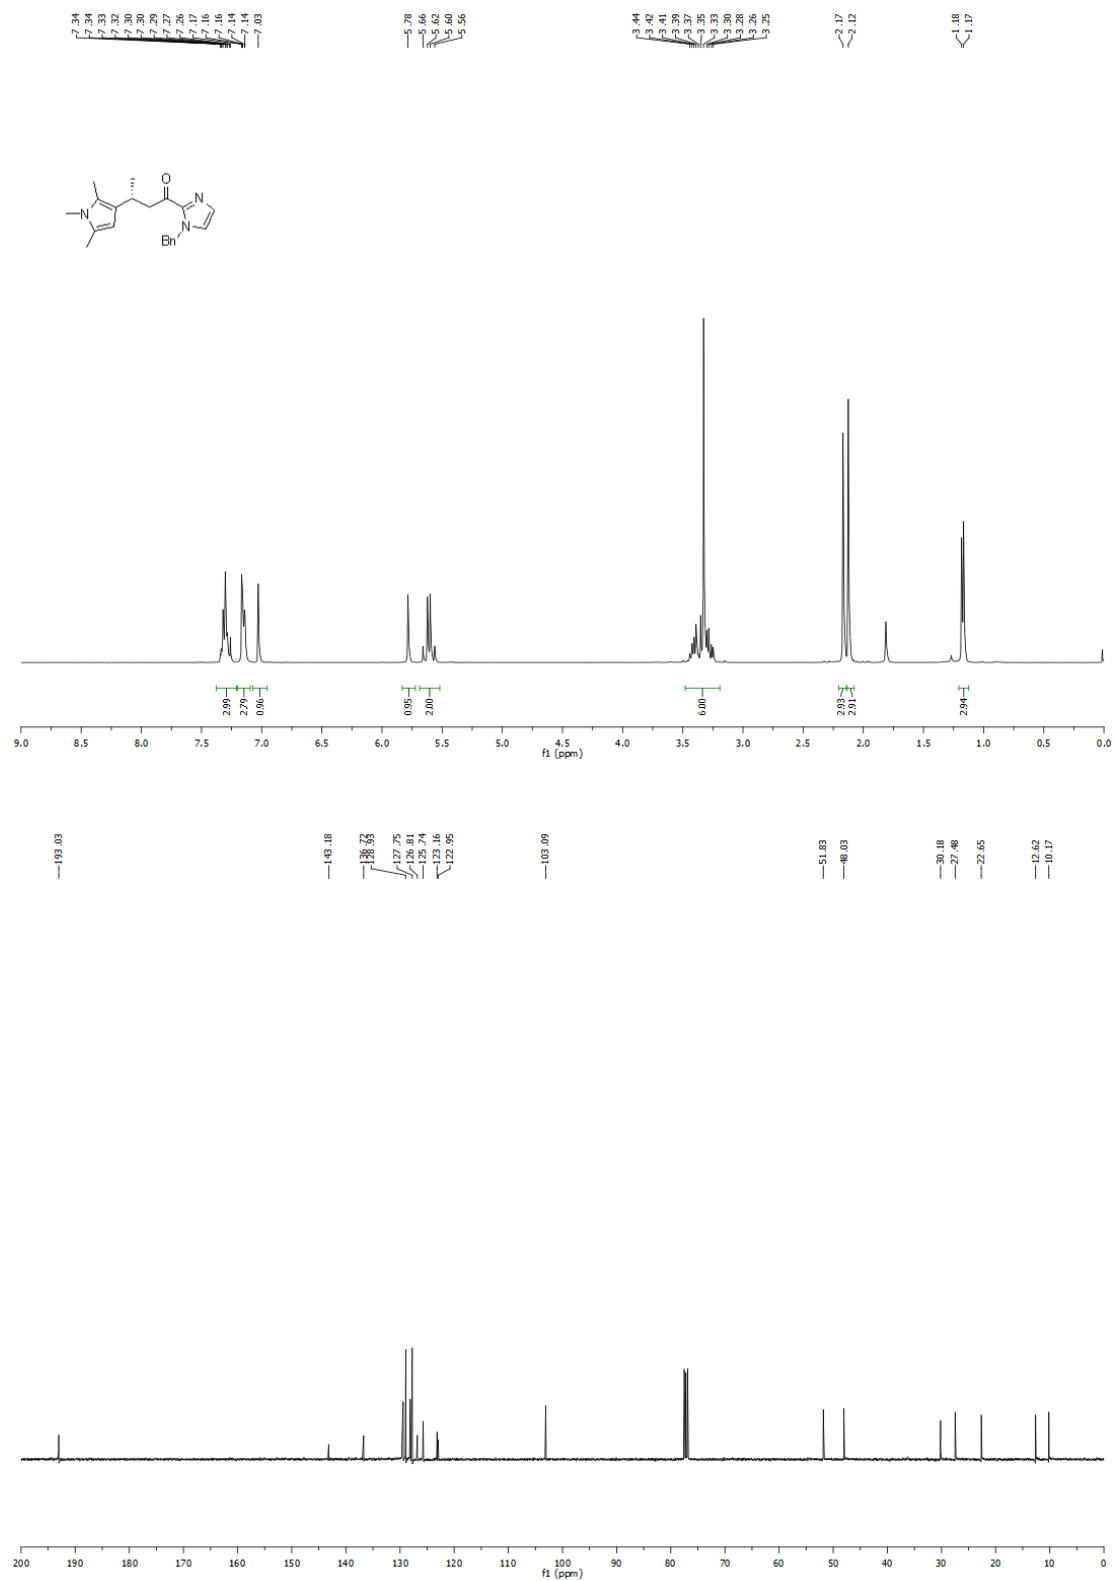

(*R*)-1-(1-Benzyl-1*H*-imidazol-2-yl)-3-(1-benzyl-2,5-dimethyl-1*H*-pyrrol-3-yl)butan-1-one (**9e**)

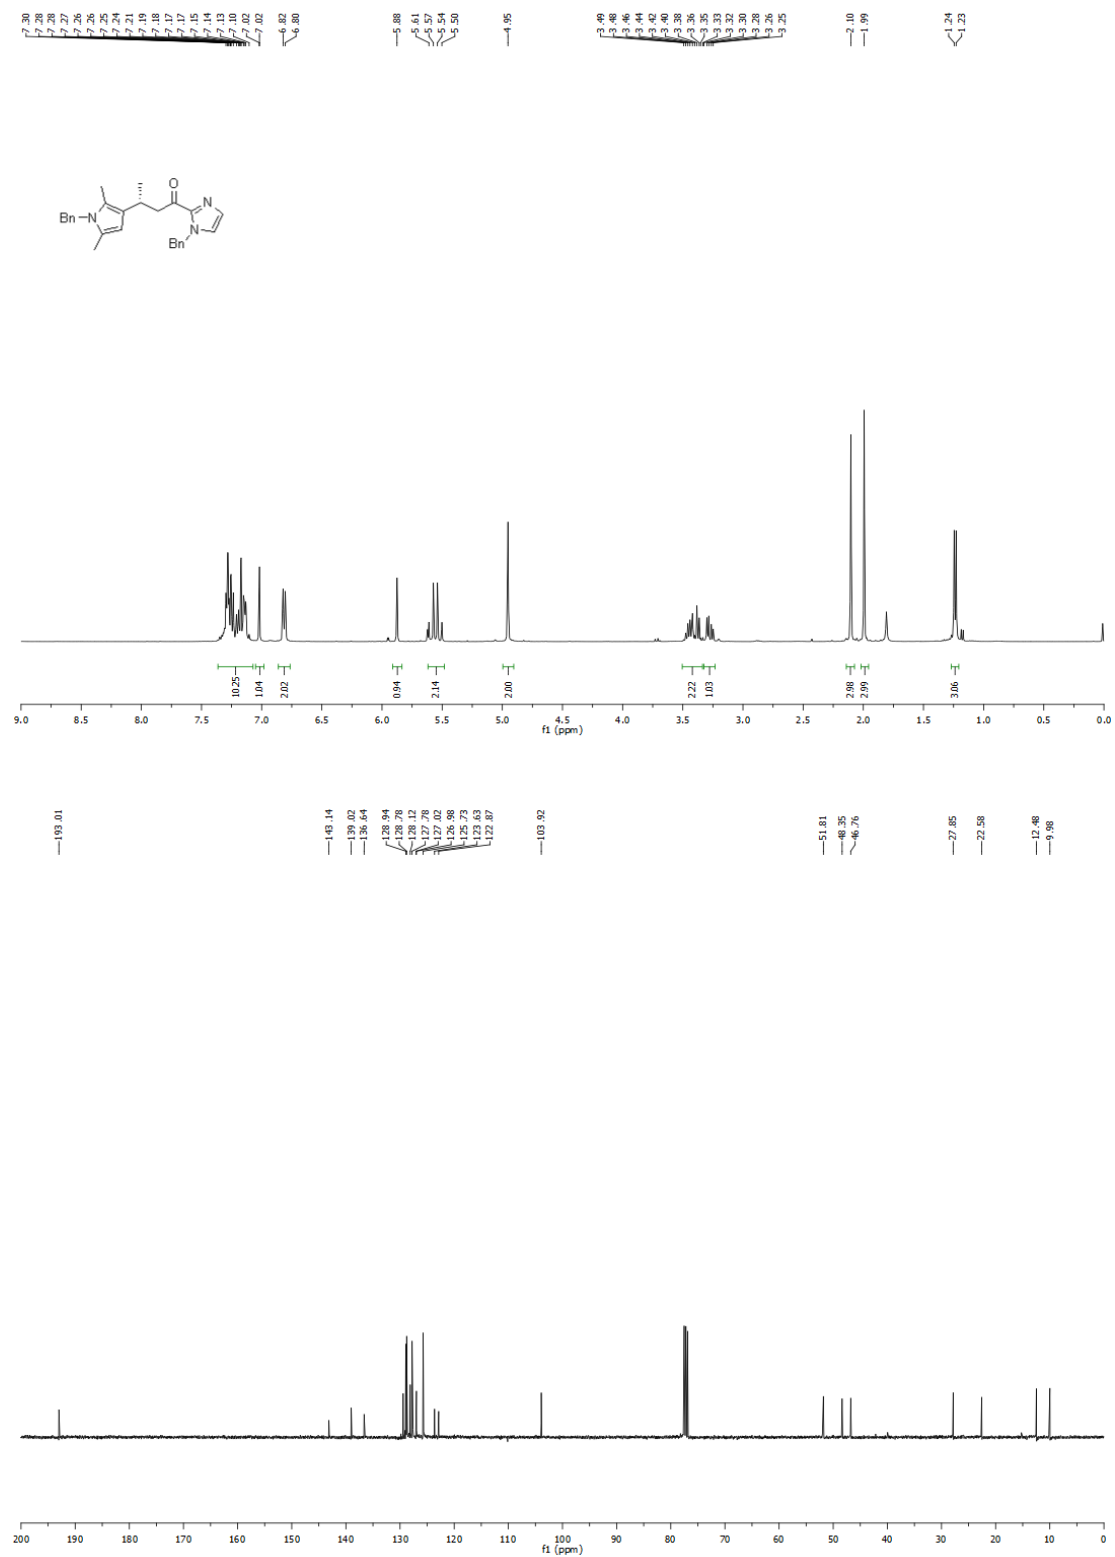

(*R*)-Ethyl 4-(1-benzyl-1*H*-imidazol-2-yl)-4-oxo-2-(1,2,5-trimethyl-1*H*-pyrrol-3-yl)butanoate (**9f**)

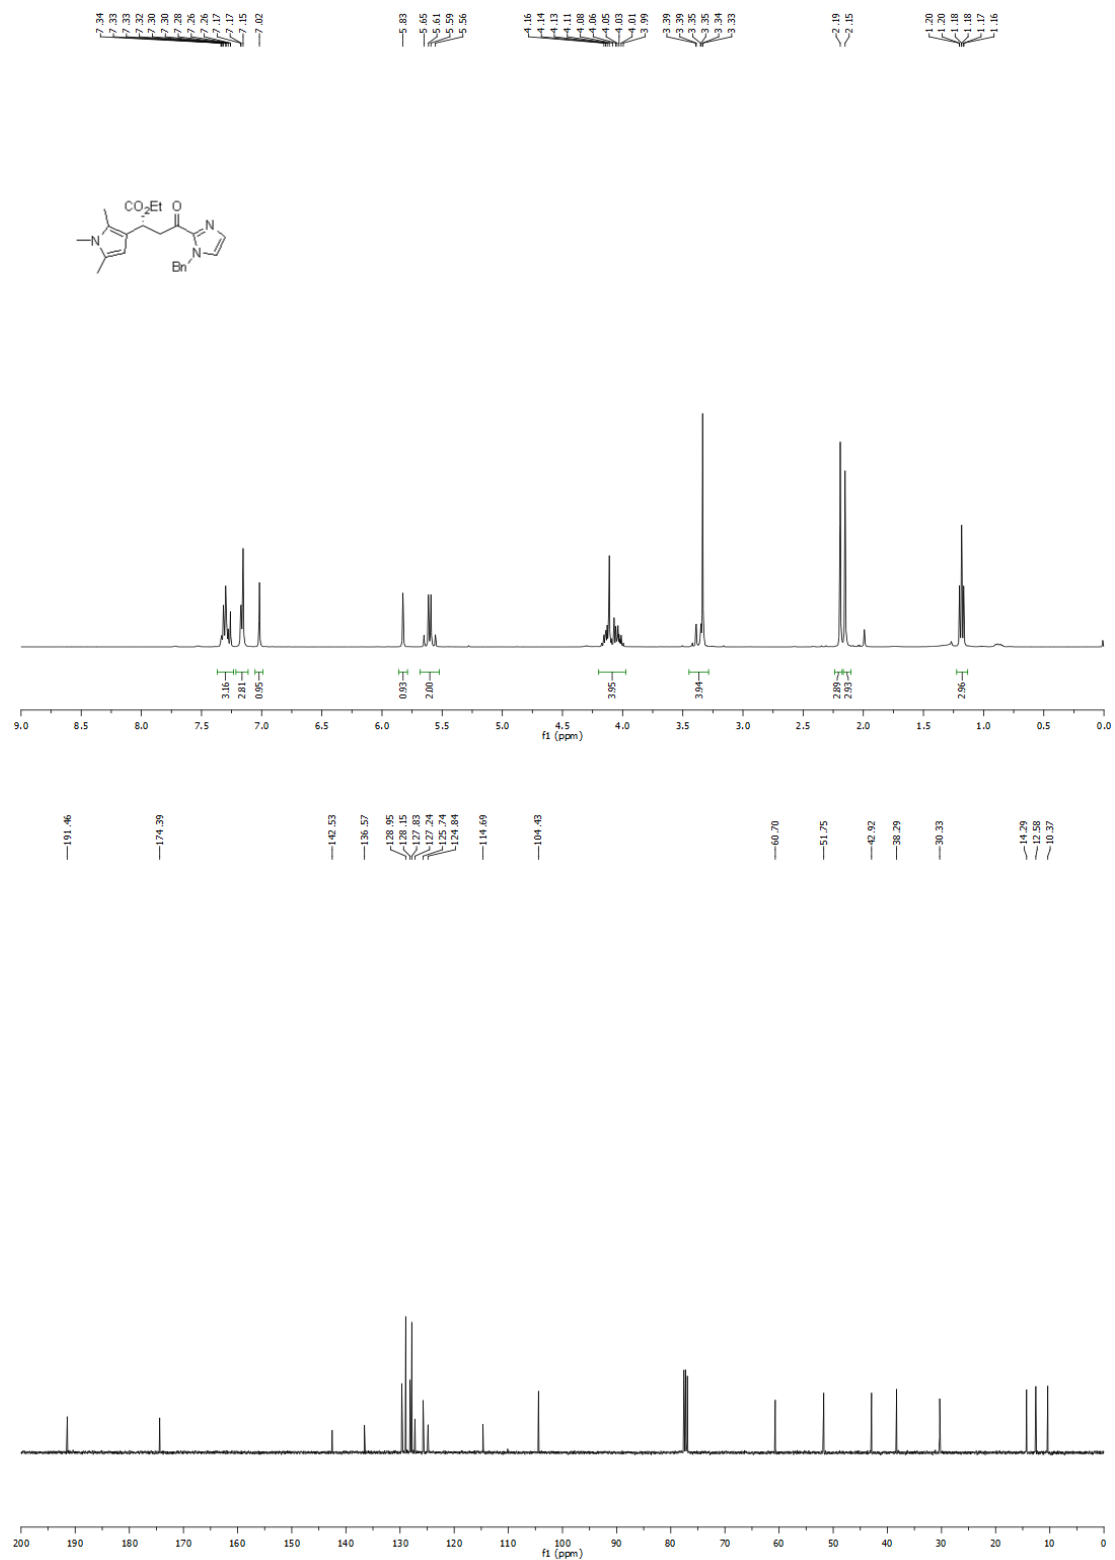

(R)-1-(1-Benzyl-1H-imidazol-2-yl)-3-(4-(pyrrolidin-1-yl) phenyl)butan-1-one (**11a**)

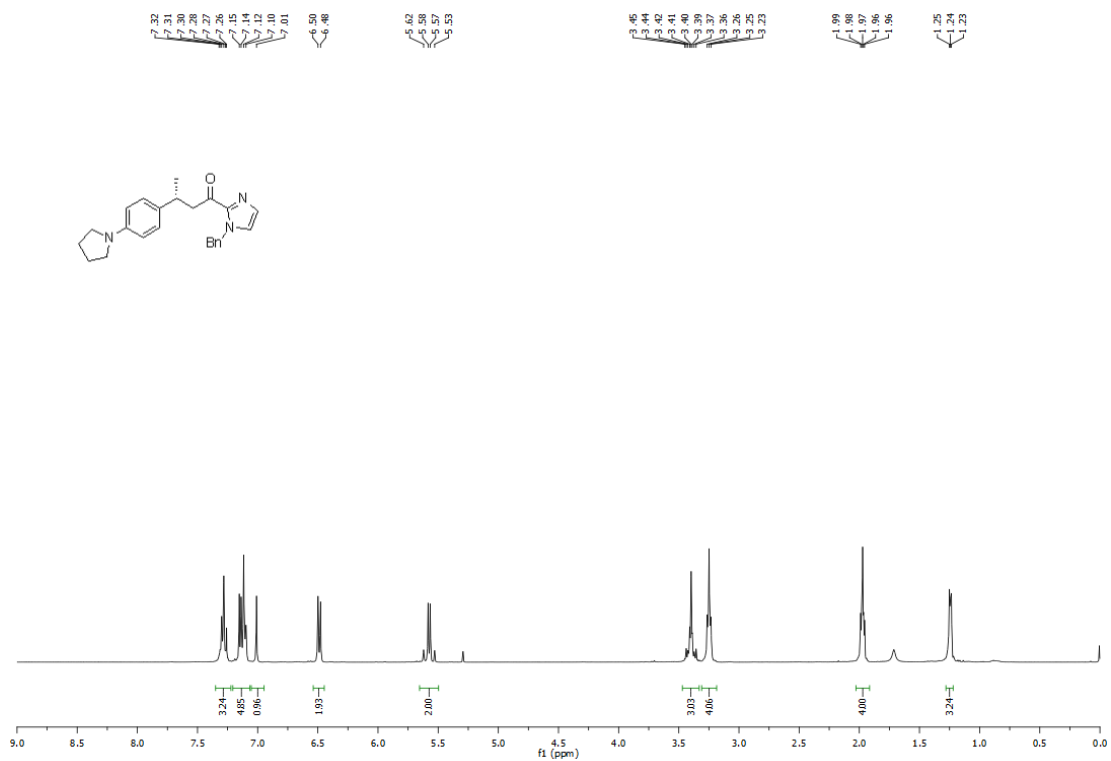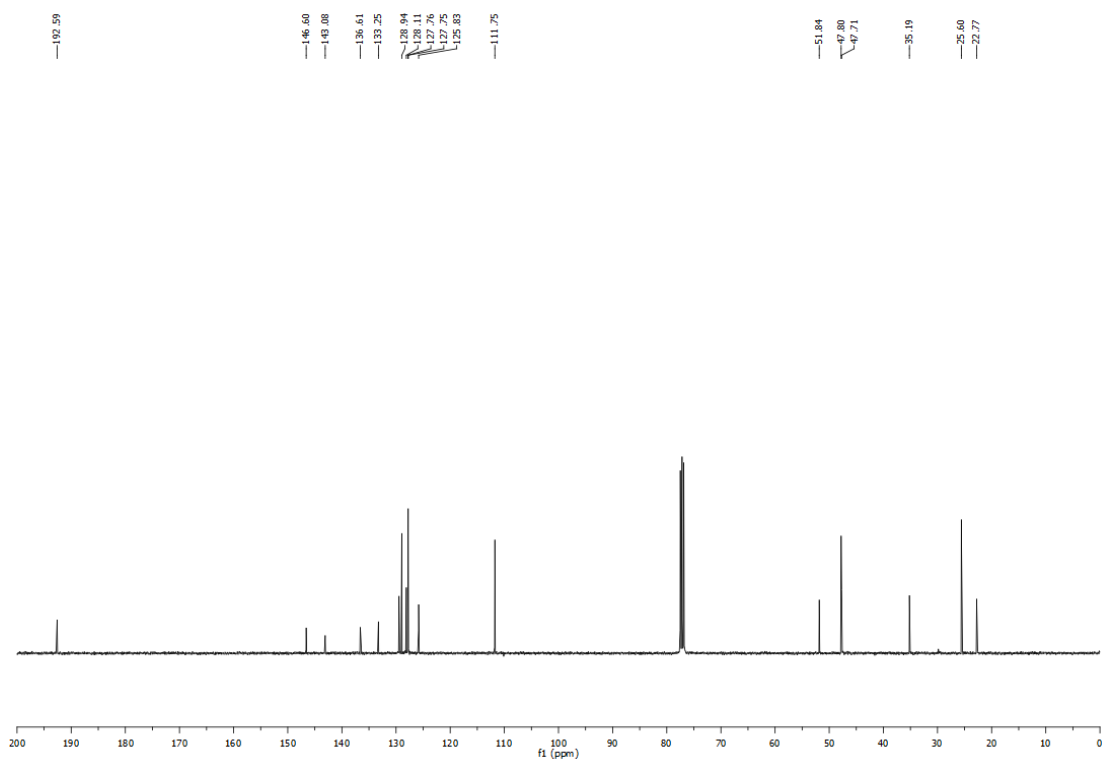



(*R*)-Methyl 4-(1-benzyl-1*H*-imidazol-2-yl)-4-oxo-2-(4-(pyrrolidin-1-yl)phenyl) butanoate (**11b**)

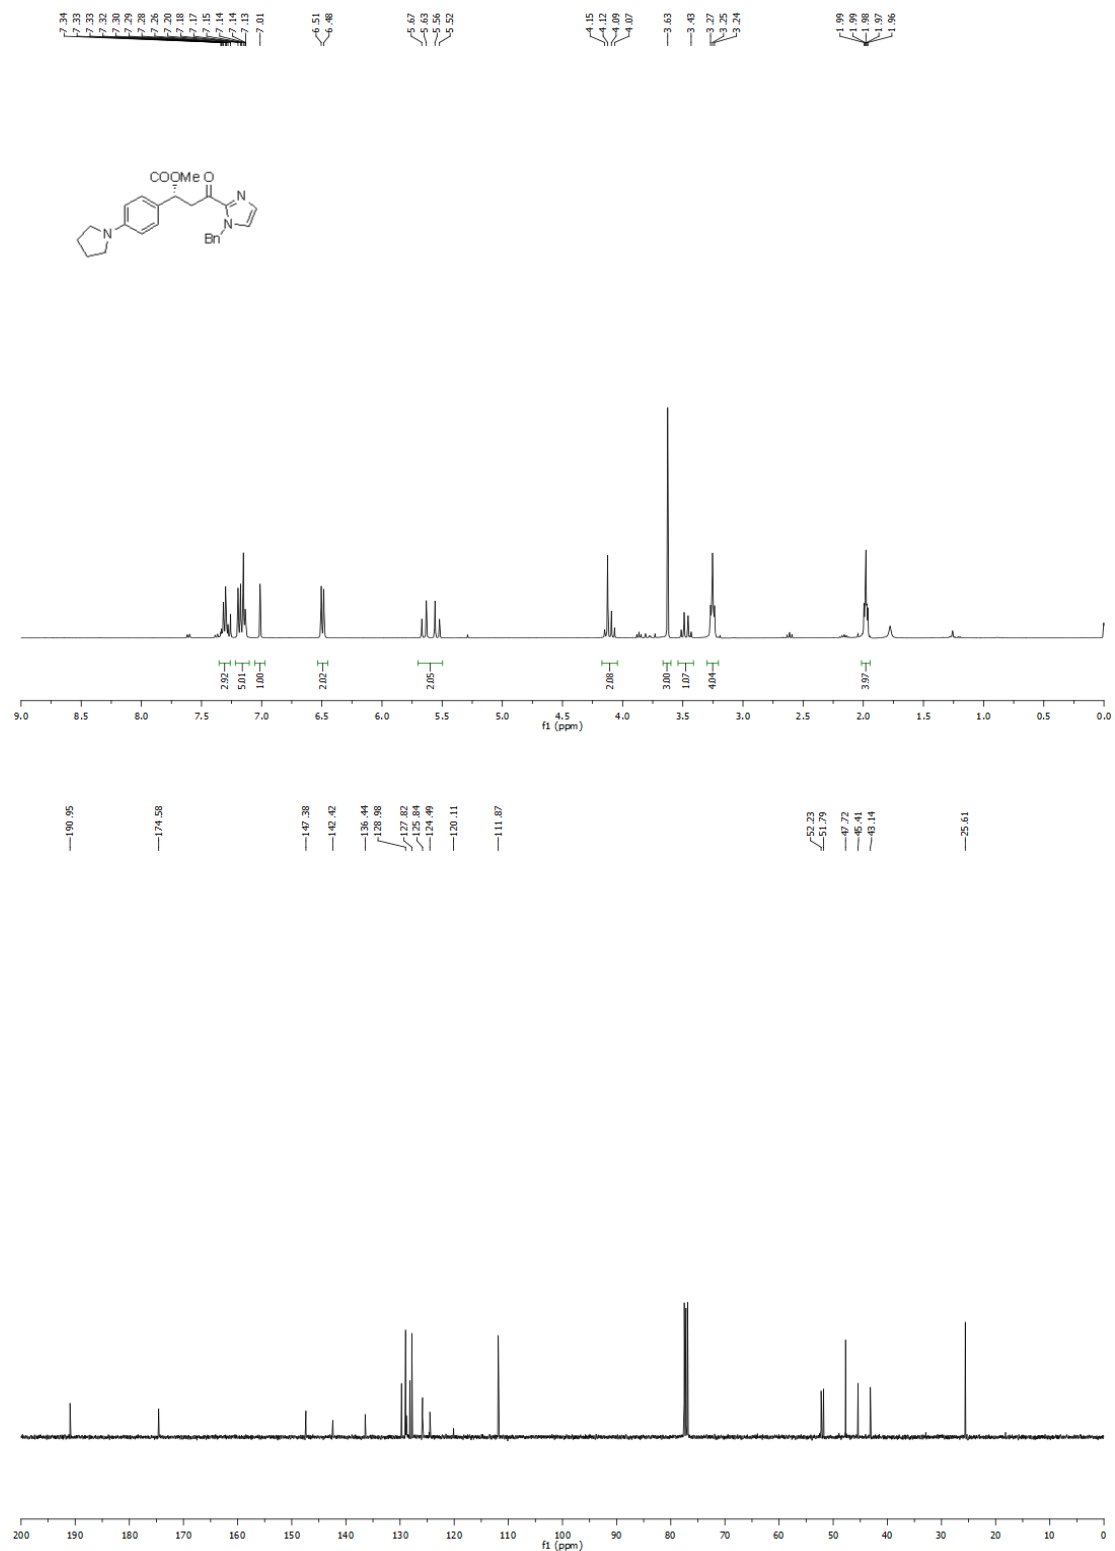

(R)-Ethyl 4-(1-benzyl-1H-imidazol-2-yl)-4-oxo-2-(4-(pyrrolidin-1-yl)phenyl) butanoate (**11c**)

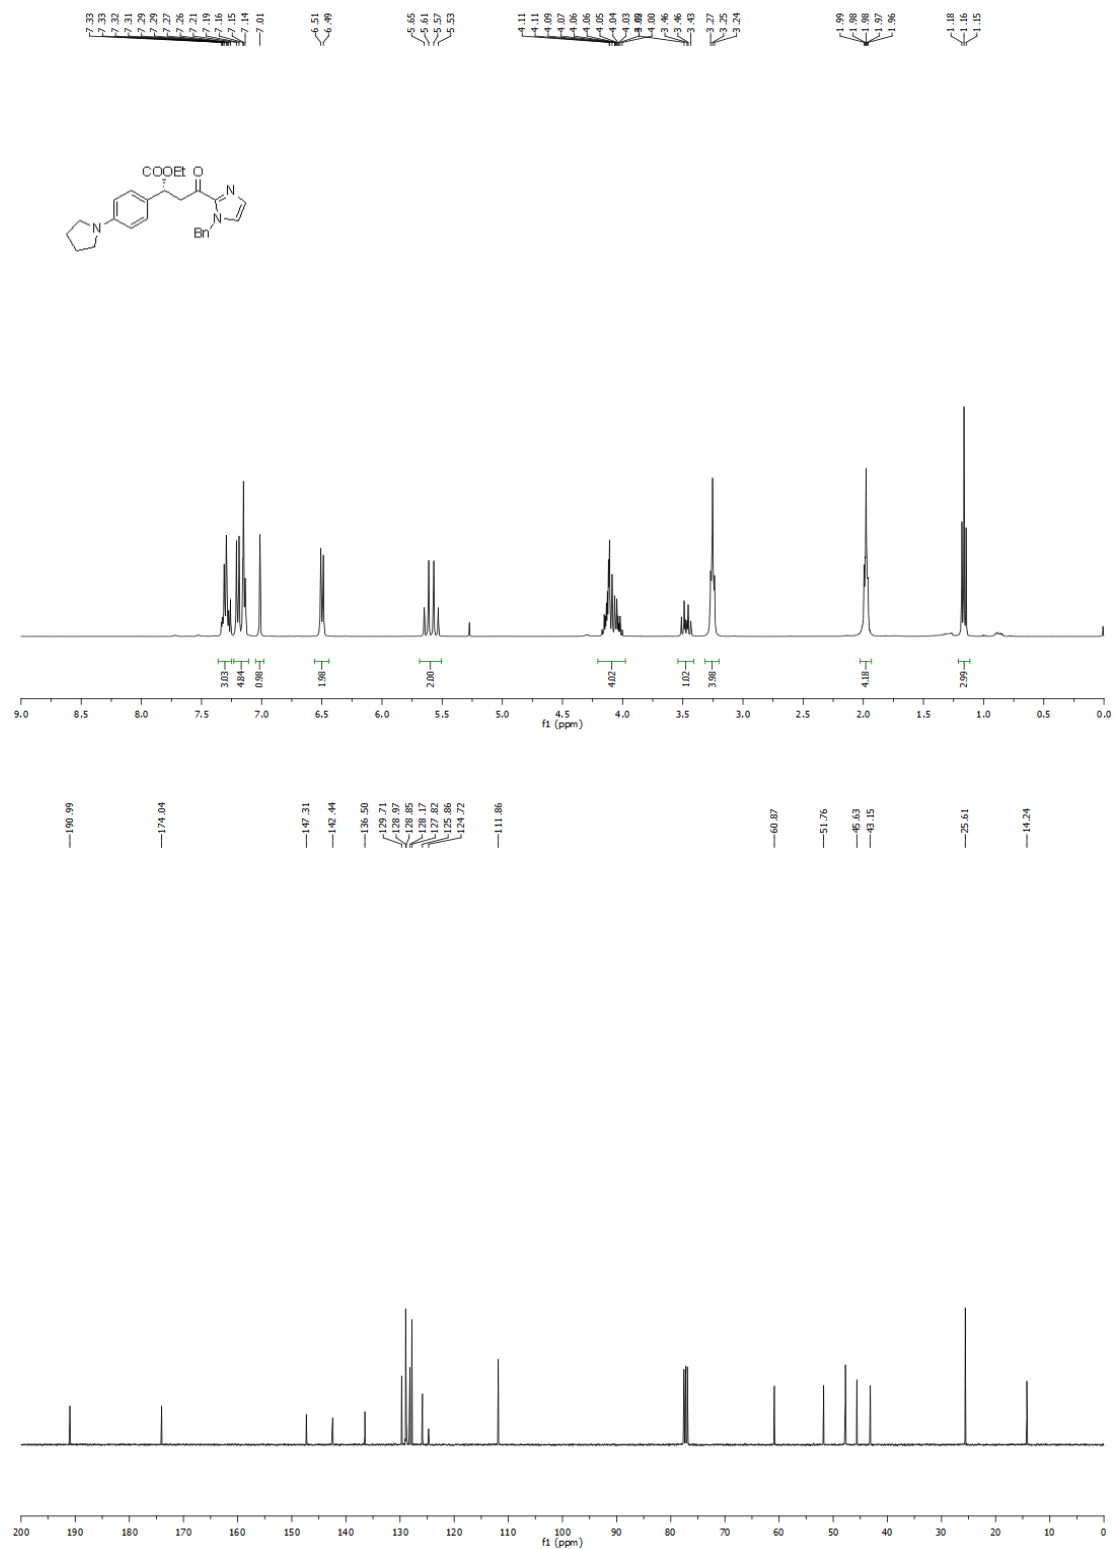

**(R)-tert-Butyl 4-(1-benzyl-1H-imidazol-2-yl)-4-oxo-2-(4-(pyrrolidin-1-yl) phenyl) butanoate (11d)**

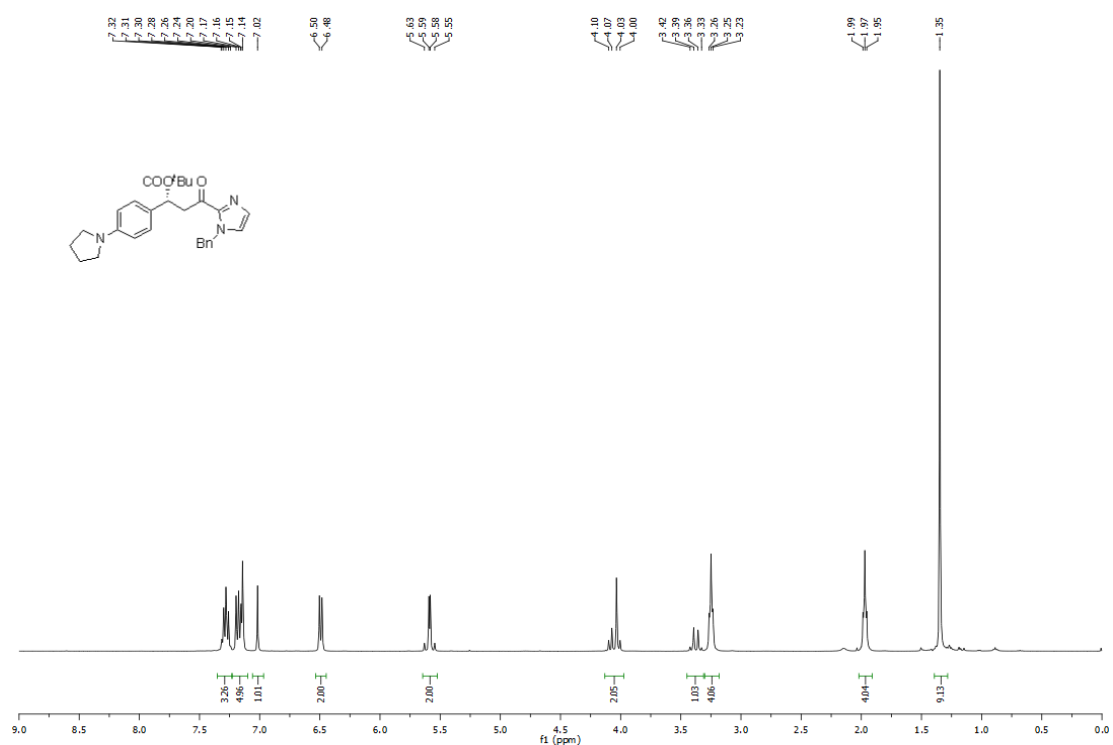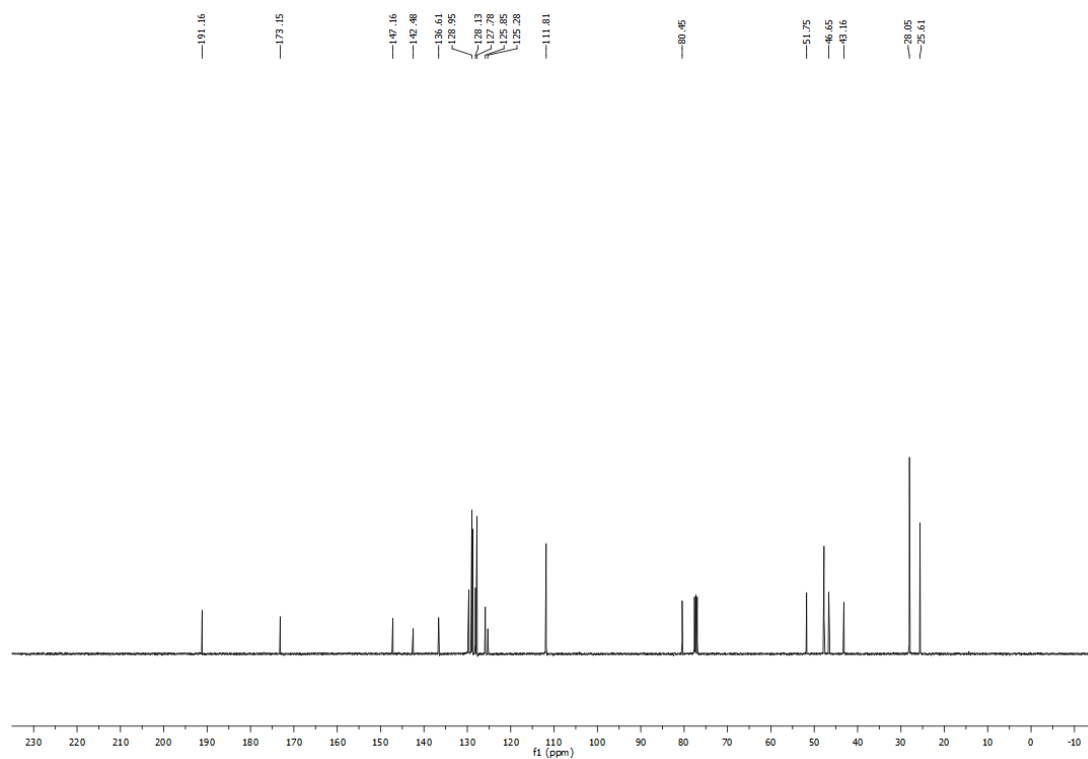

(*R*)-Ethyl 4-(1-benzyl-1*H*-imidazol-2-yl)-2-(3-methyl-4-(pyrrolidin-1-yl) phenyl)-4-oxo-butanoate (**11e**)

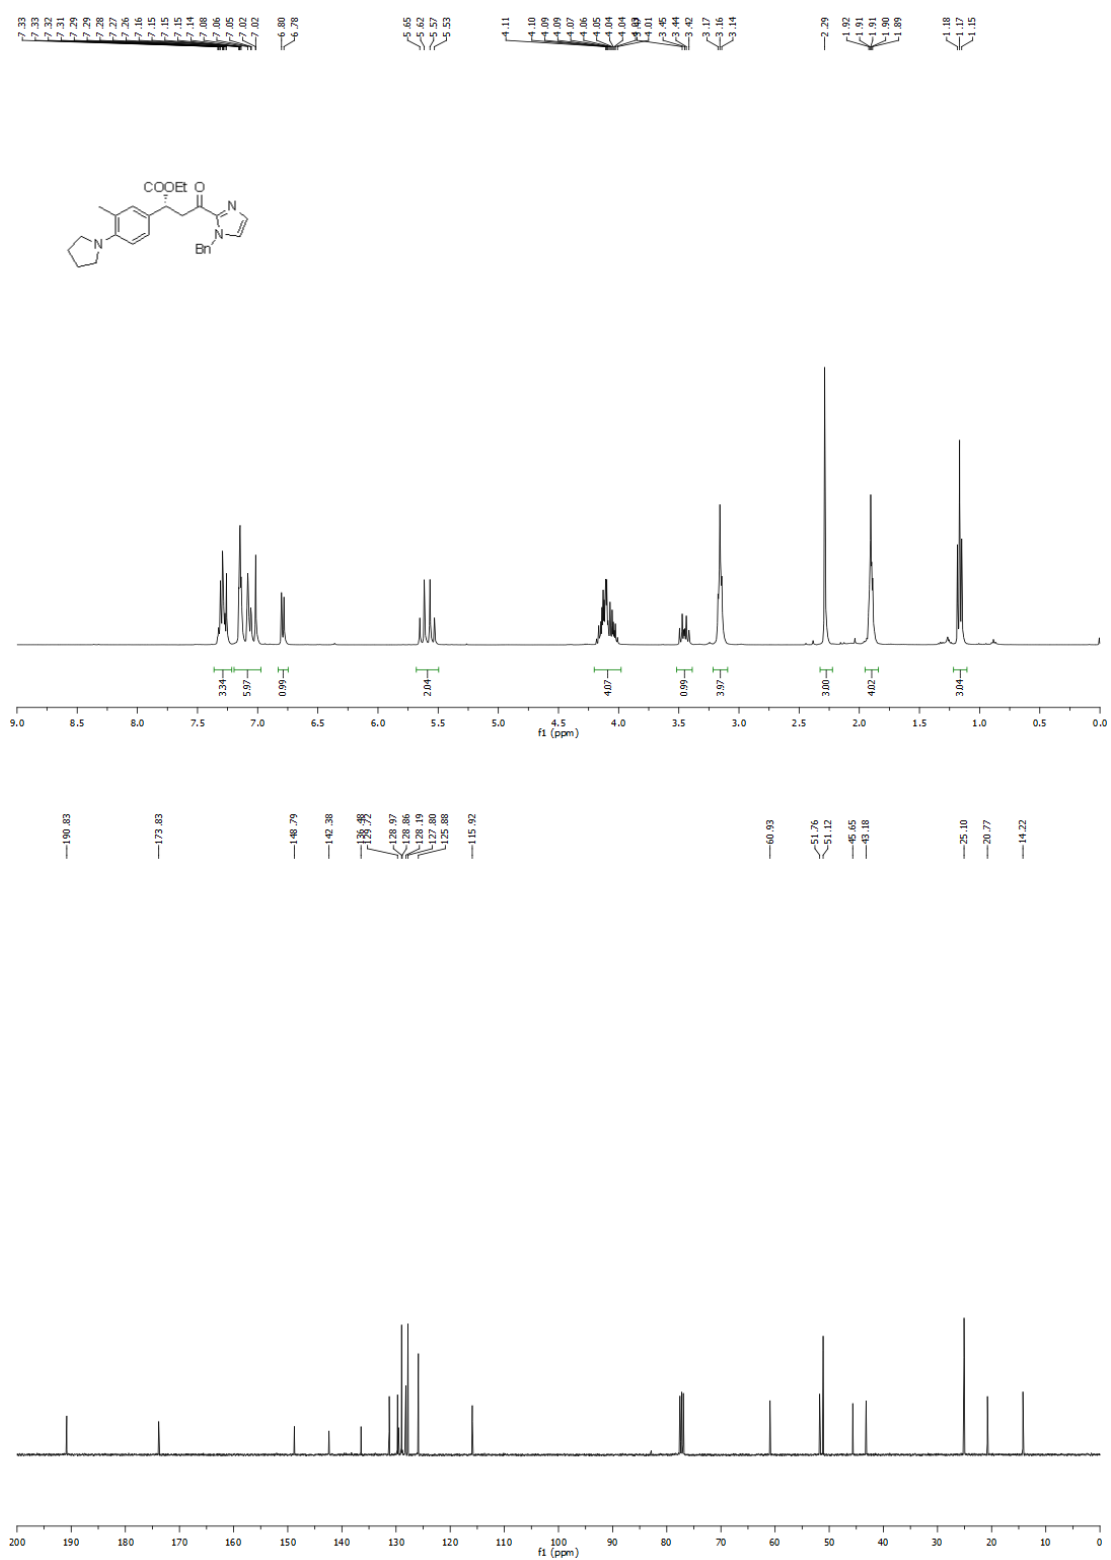

(R)-1-(1-Benzyl-1H-imidazol-2-yl)-3-(1-benzylindolin-5-yl)butan-1-one (**11f**)

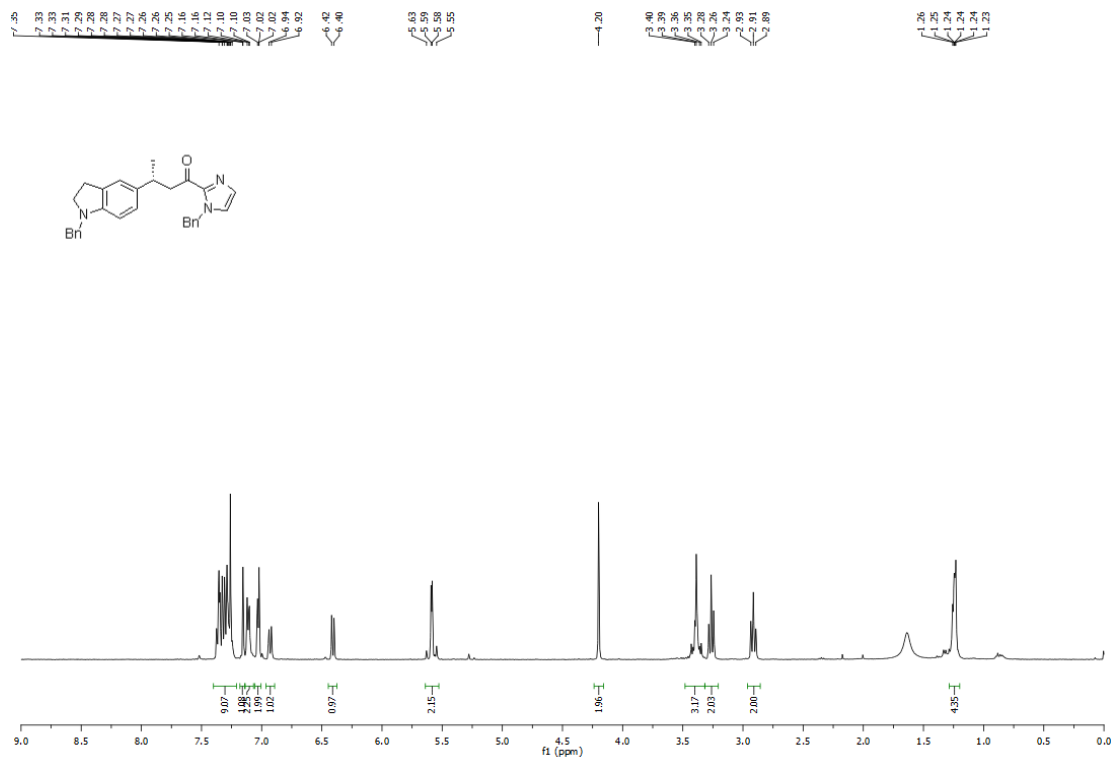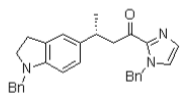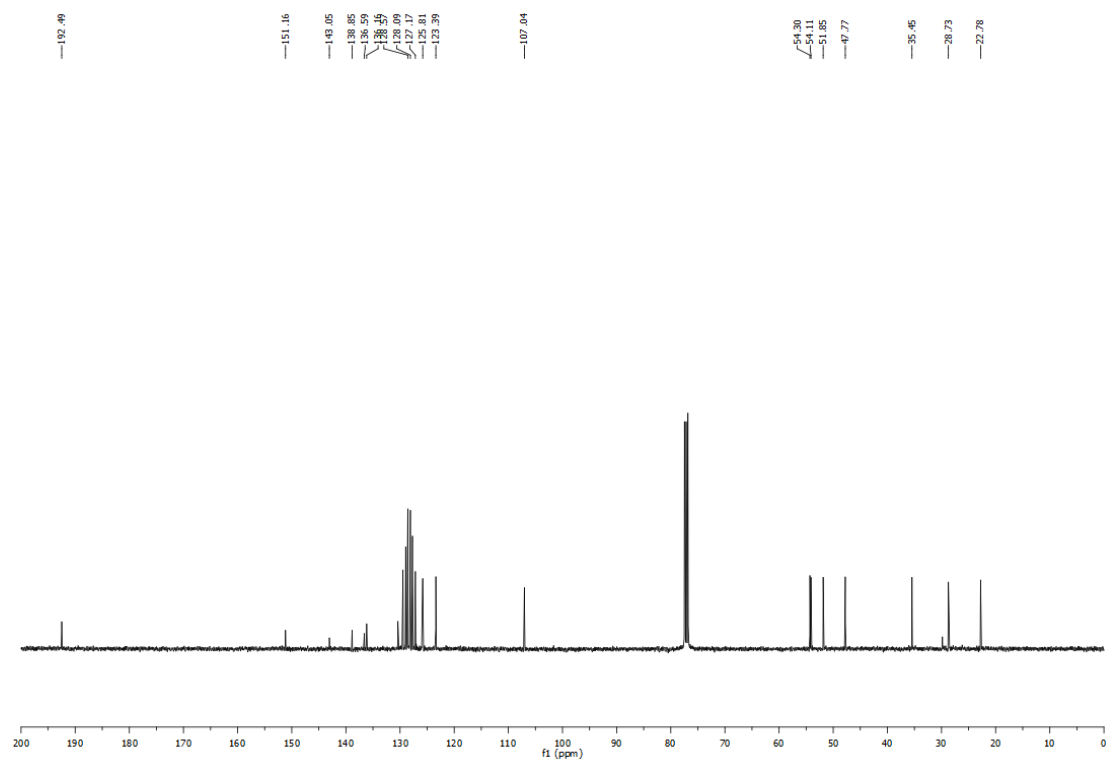

(*R*)-Methyl 4-(1-benzylimidazolyl)-2-(1-benzylindolyl)-4-oxo-butanoate (**11g**)

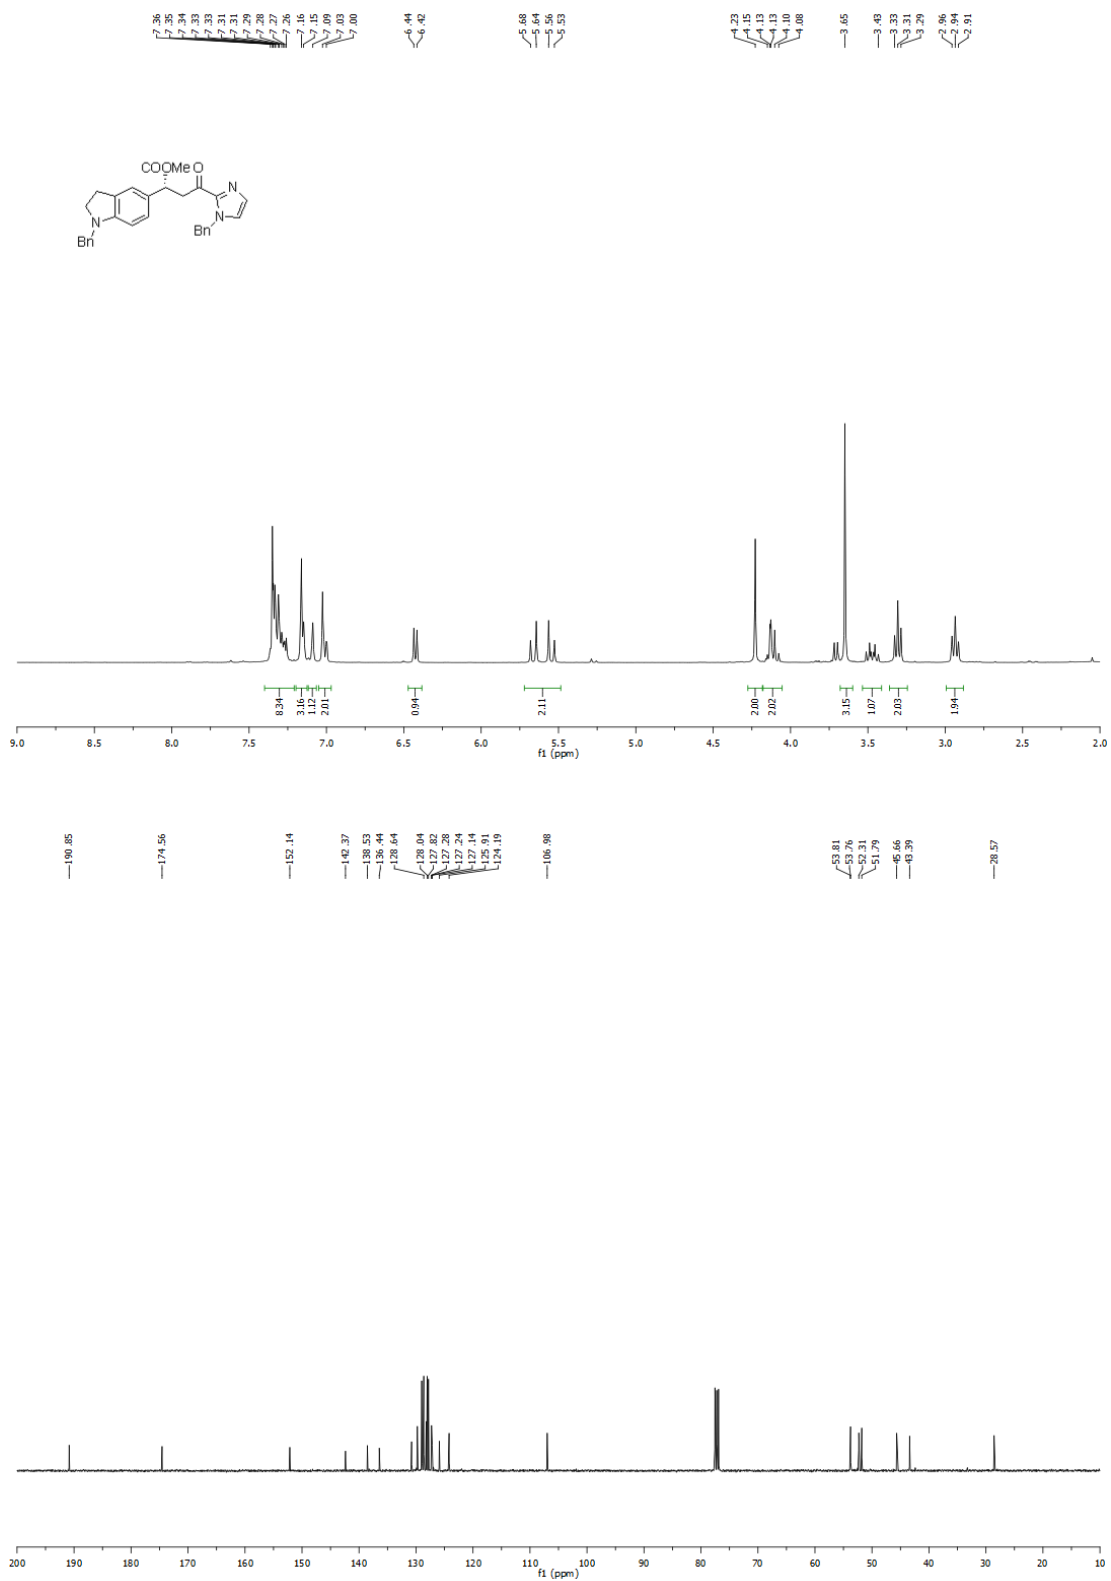

(R)-1-(1-Benzylimidazol-2-yl)-3-(4-(dimethylamino)-2-methoxyphenyl)butan-1-one (**11h**)

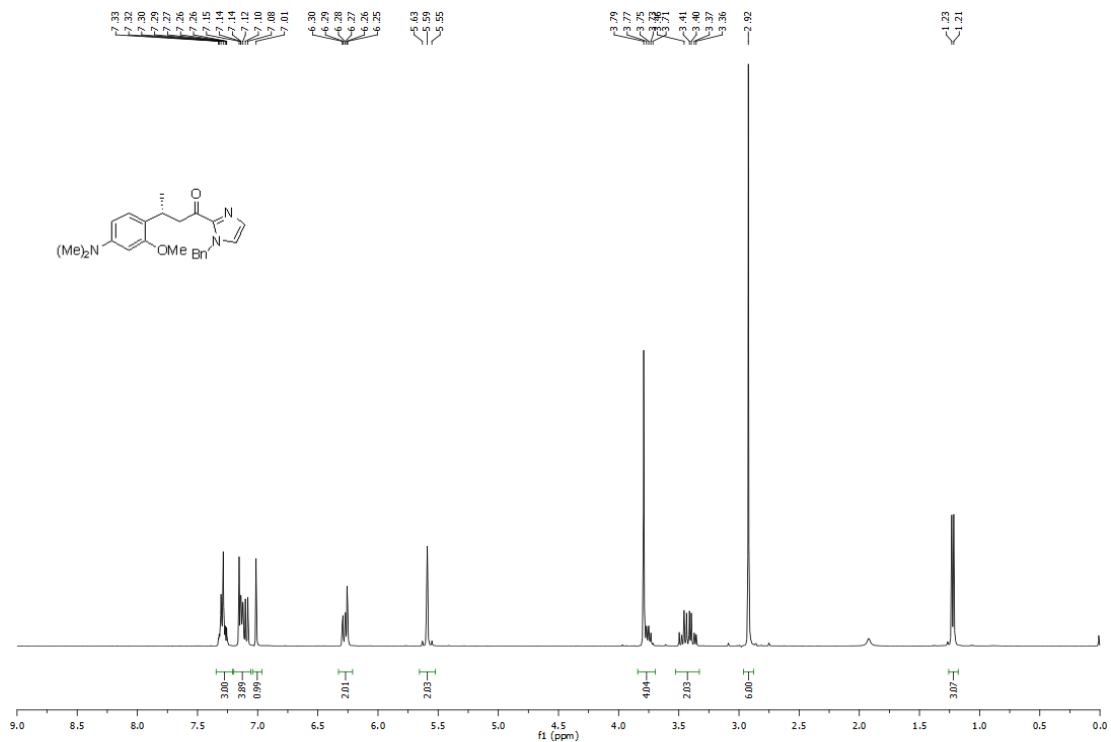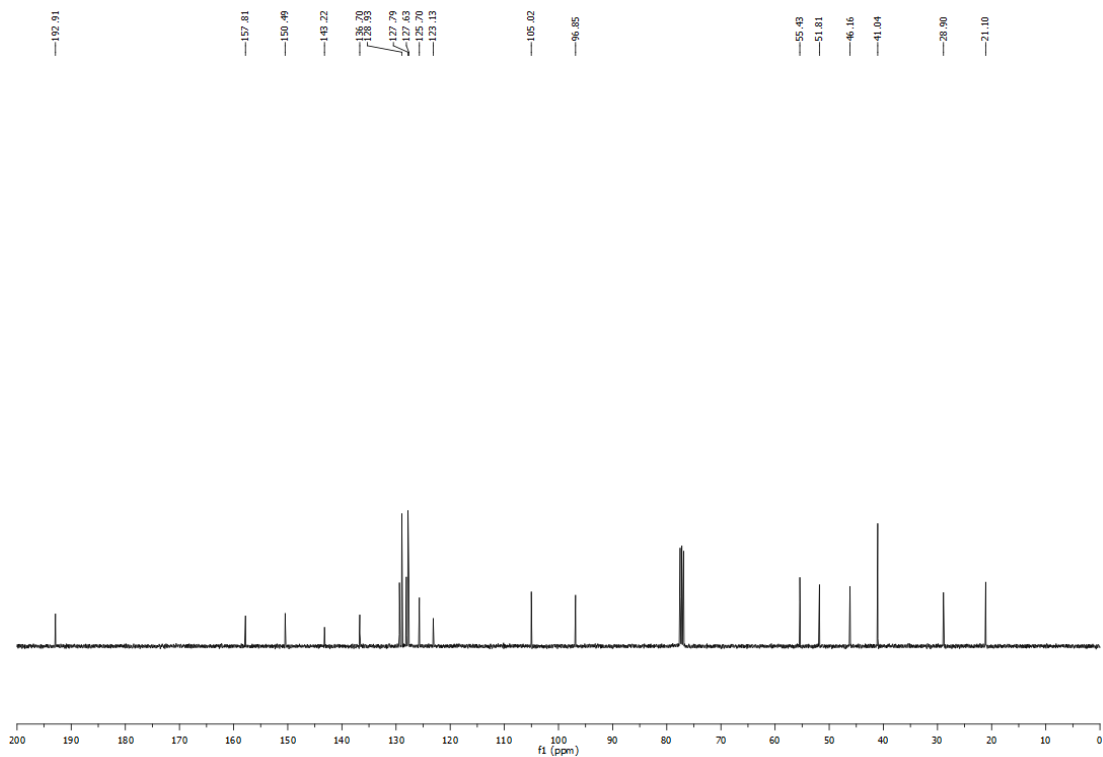

(R)-3-(5-Methoxy-3-methyl-1H-indol-1-yl) butanoic acid (**12**)

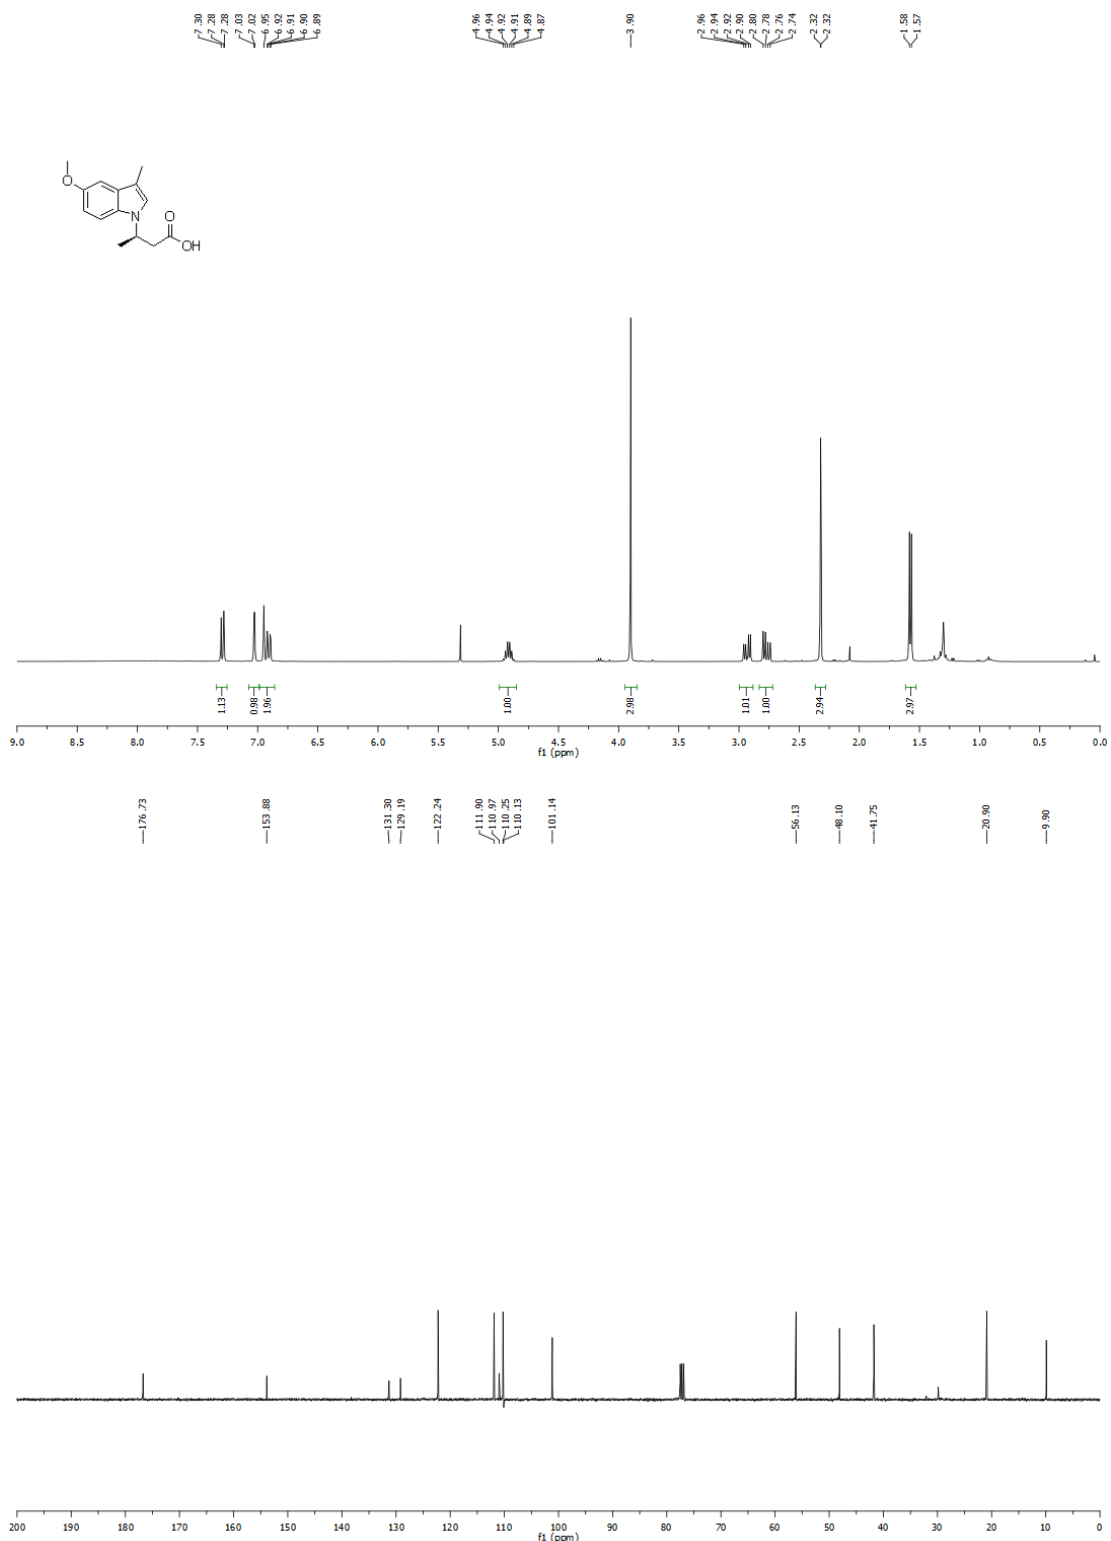



(*R*)-Methyl 3-(5-methoxy-3-methyl-1*H*-indol-1-yl) butanoate (**13**)

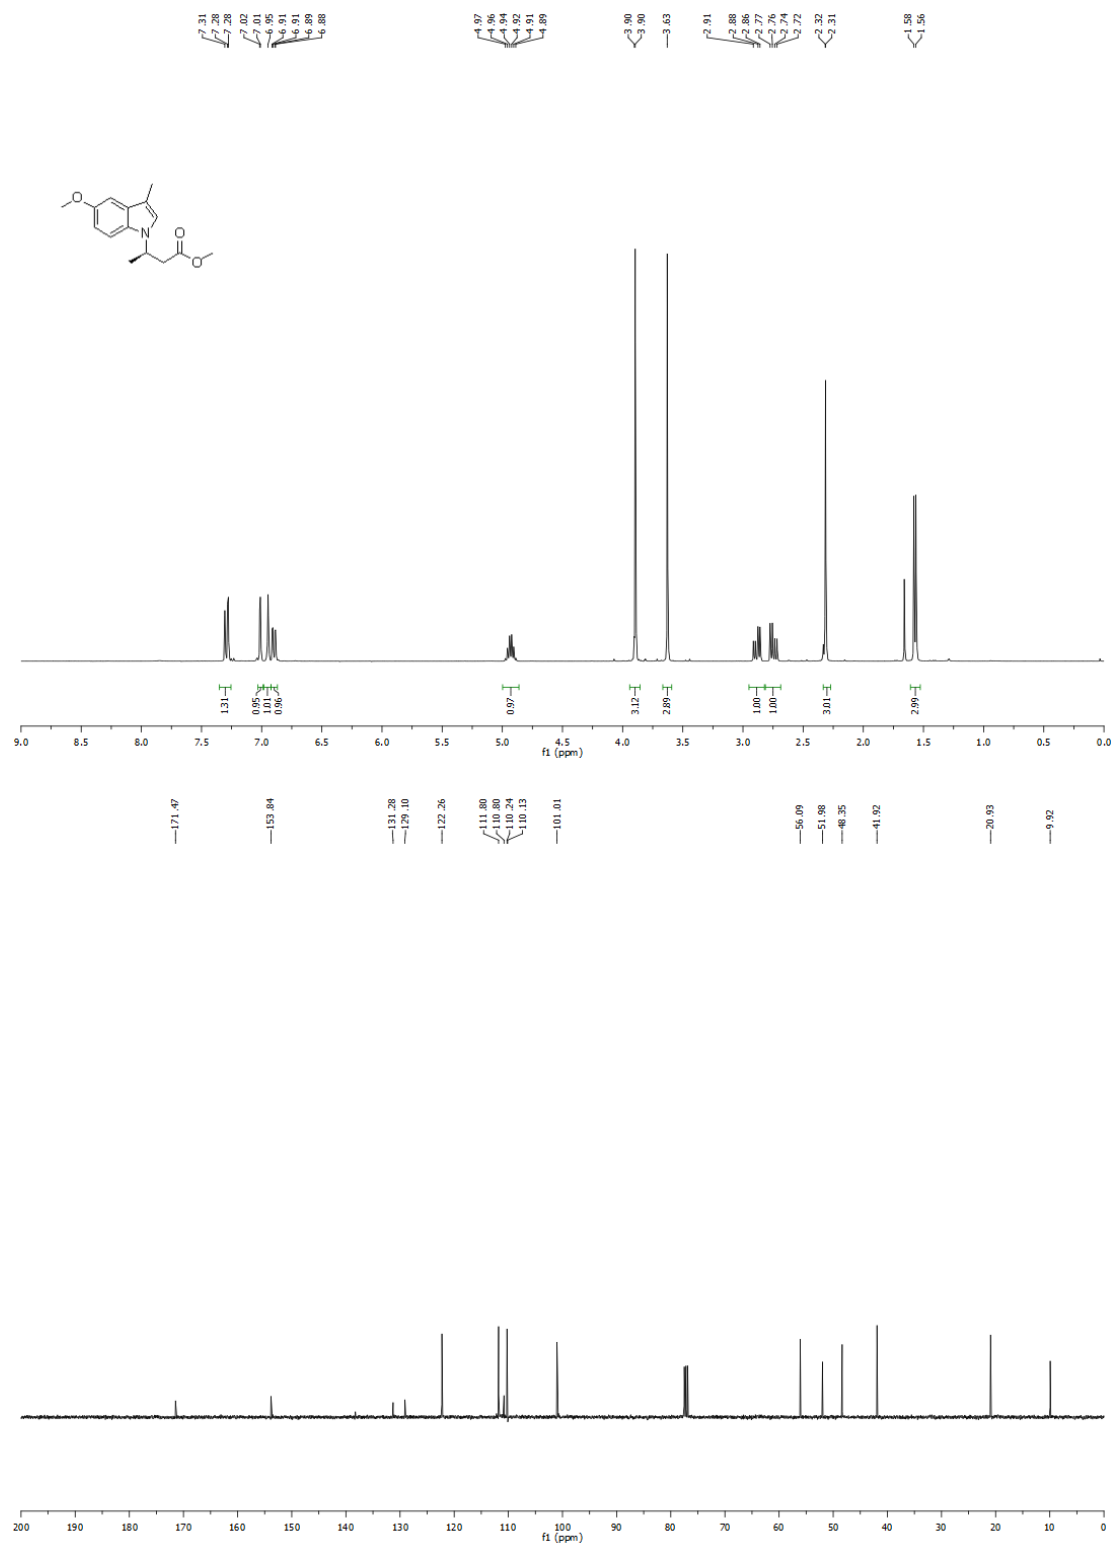

(*R*)-*N*-Isopropyl-3-(5-methoxy-3-methyl-1*H*-indol-1-yl) butanamide (**14**)

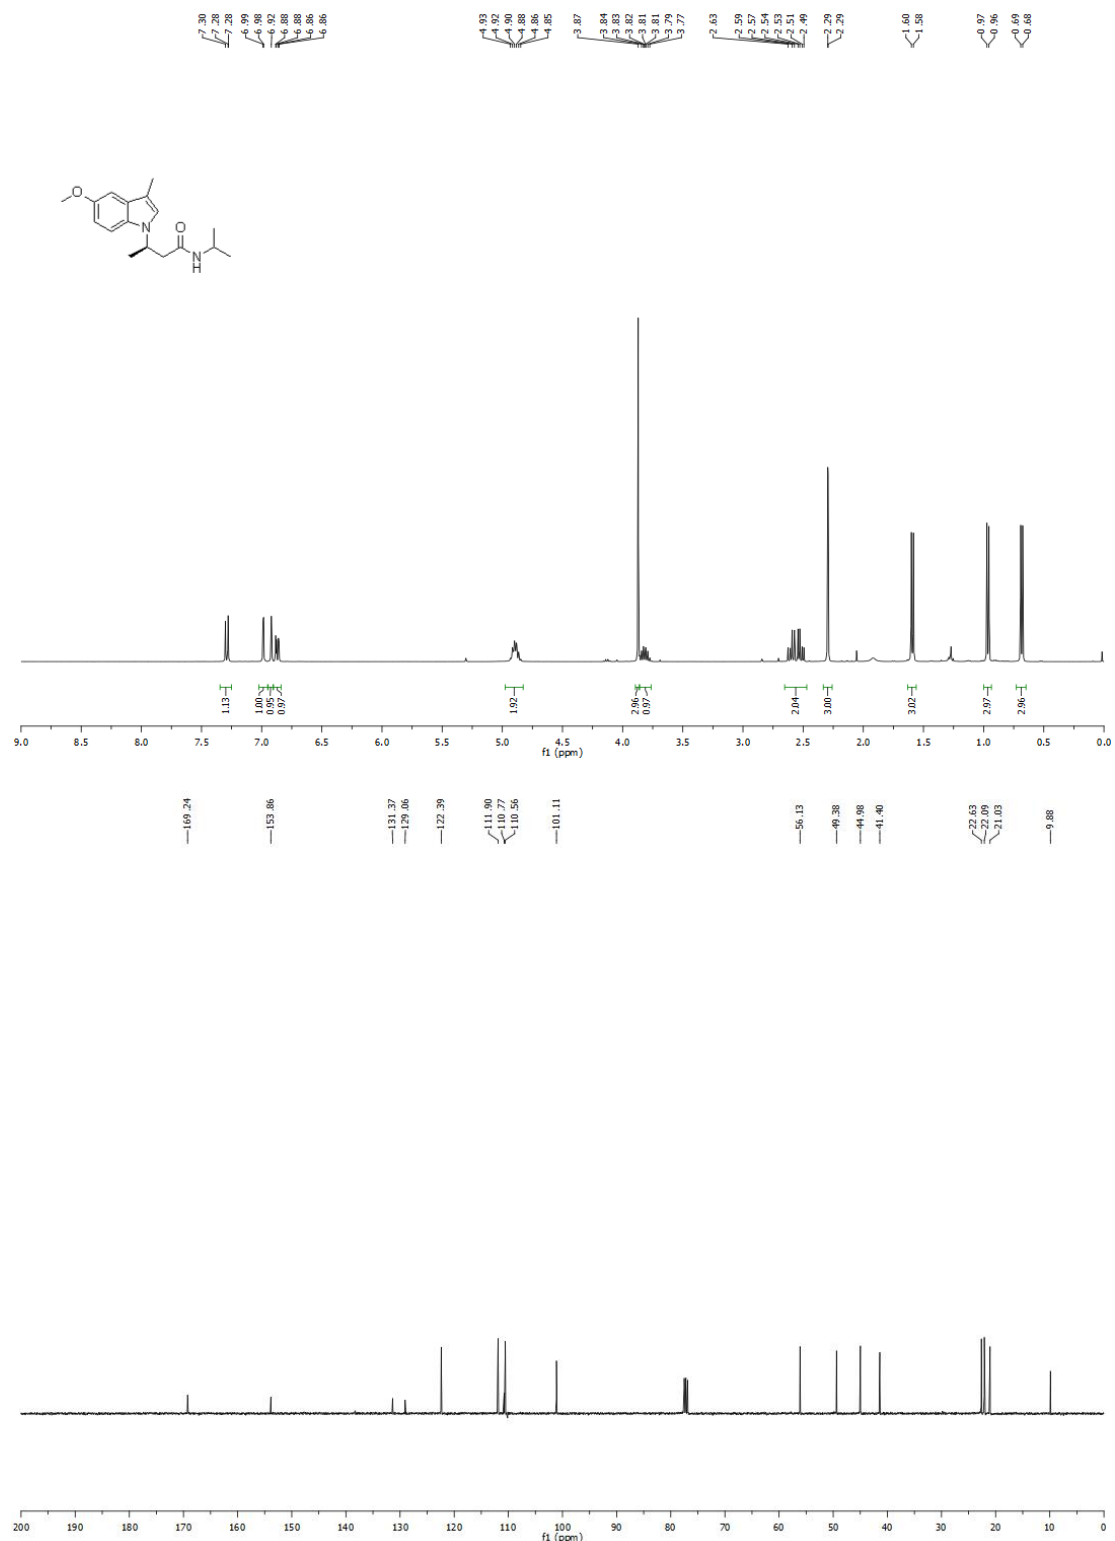

**(R)-1,9-Dimethyl-1,2-dihydropyrrolo[1,2-*a*]indol-3-one (15)**

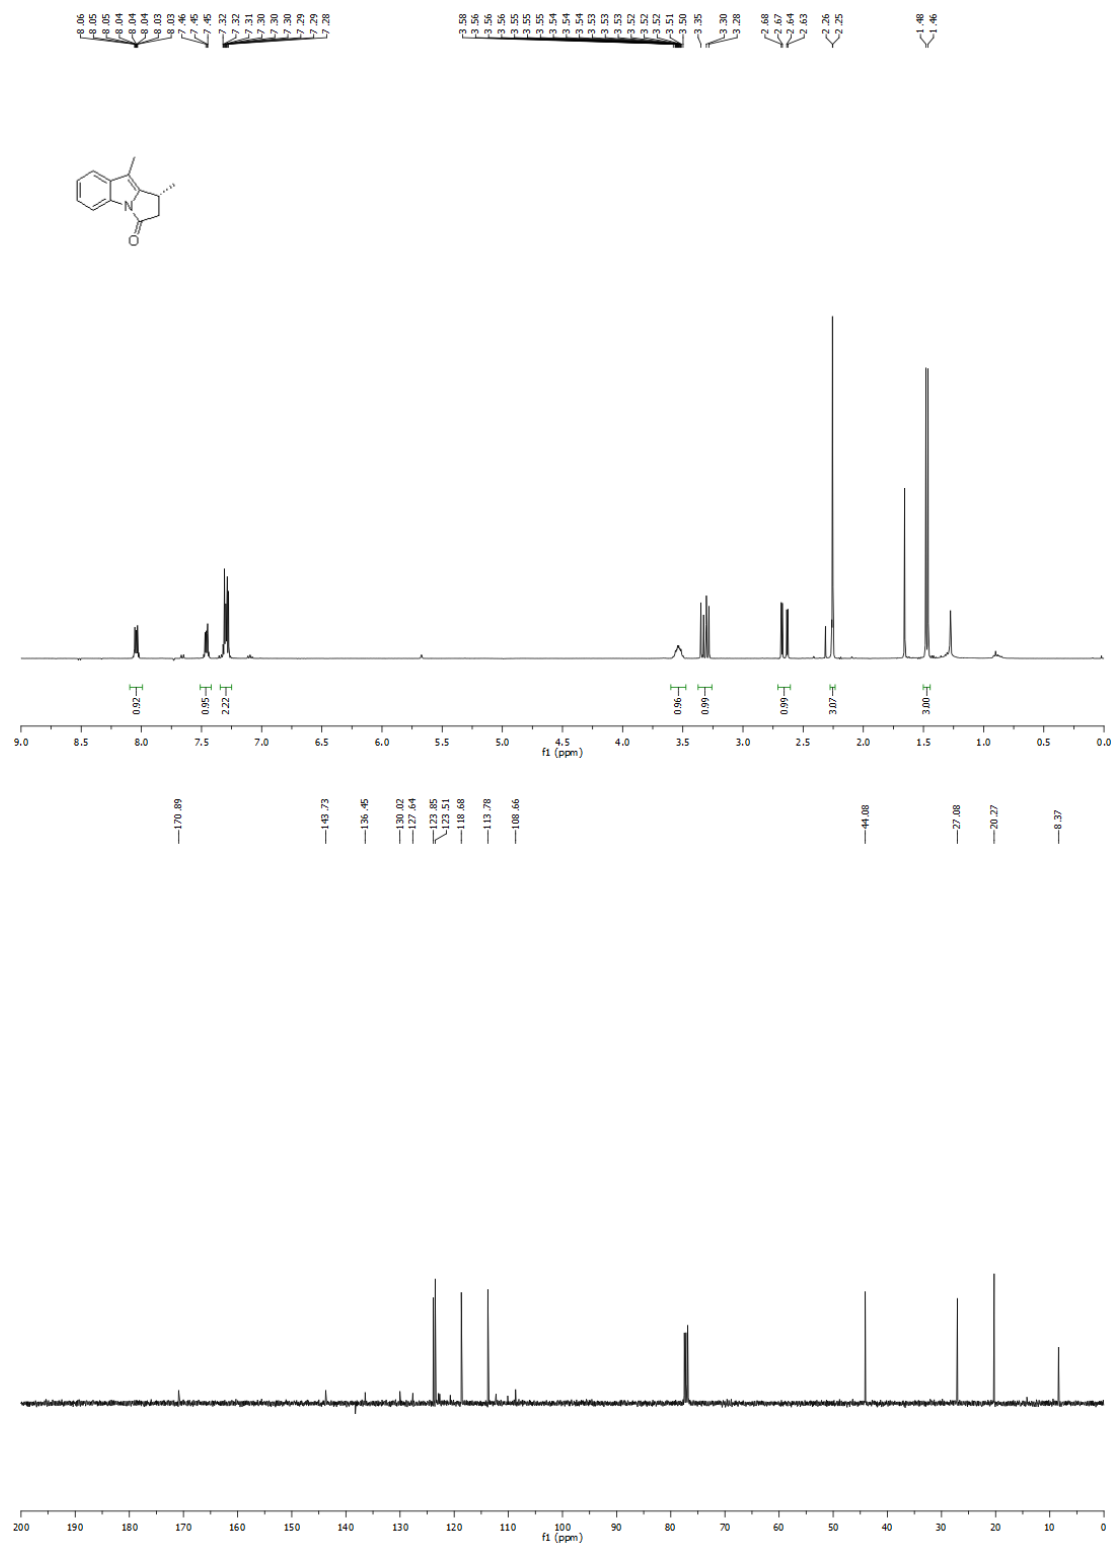

## Chiral HPLC chromatographic analysis

Chiral HPLC chromatographic analysis of C3-alkylated indole of **5a**

Condition: chiral OD-H column, *n*-hexane/2-propanol = 90: 10, flow rate: 0.7 ml/min,  $\lambda = 280$  nm, retention time: *t* (major) = 22.94 min, *t* (minor) = 27.07 min.

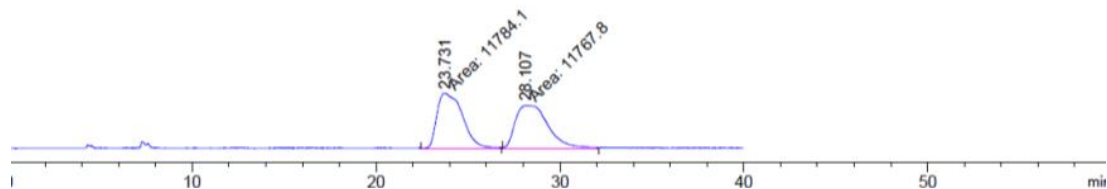

| Peak # | RetTime [min] | Type | Width [min] | Area [mAU*s] | Height [mAU] | Area %  |
|--------|---------------|------|-------------|--------------|--------------|---------|
| 1      | 23.731        | MM   | 1.5980      | 1.17841e4    | 122.90300    | 50.0346 |
| 2      | 28.107        | MM   | 2.0579      | 1.17678e4    | 95.30473     | 49.9654 |

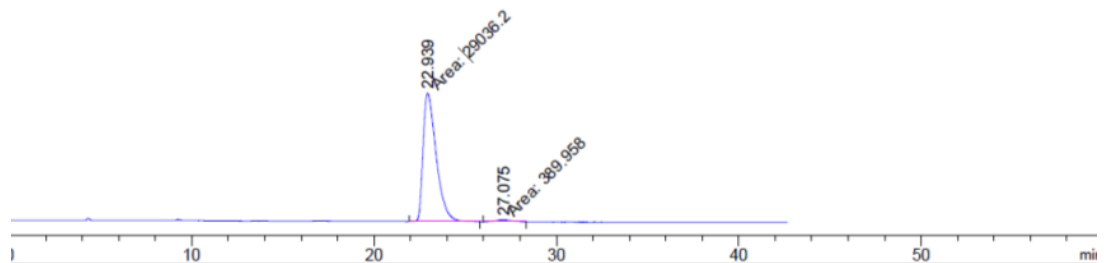

| Peak # | RetTime [min] | Type | Width [min] | Area [mAU*s] | Height [mAU] | Area %  |
|--------|---------------|------|-------------|--------------|--------------|---------|
| 1      | 22.939        | MM   | 0.8307      | 2.90362e4    | 582.54944    | 98.6748 |
| 2      | 27.075        | MM   | 0.8108      | 389.95764    | 8.01572      | 1.3252  |

Chiral HPLC chromatographic analysis of C3-alkylated indole of **5b**

Condition: chiral OD-3 column, *n*-hexane/2-propanol = 92: 8, flow rate: 0.7 ml/min,  $\lambda$  = 280 nm, retention time: t (major) = 42.84 min, t (minor) = 47.87 min.

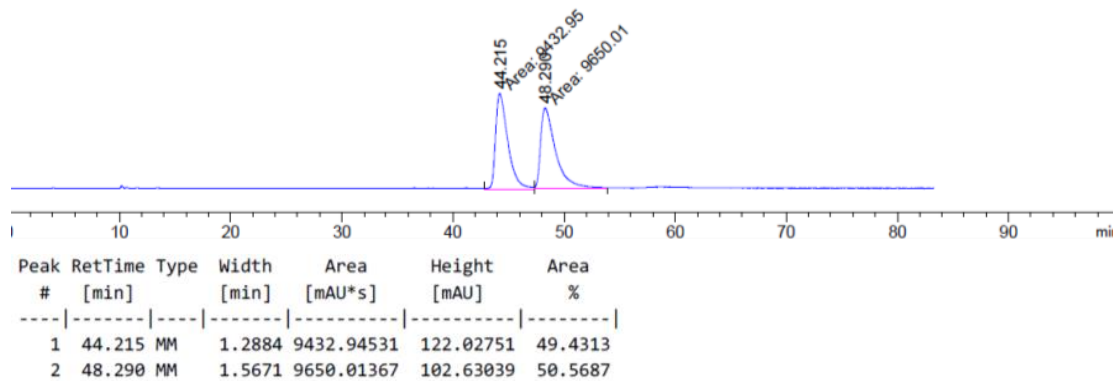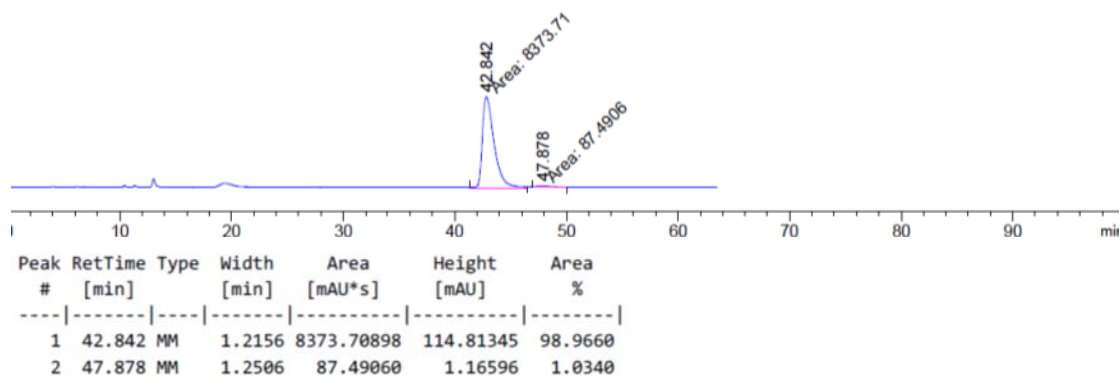

Chiral HPLC chromatographic analysis of C3-alkylated indole of **5c**

Condition: chiral OD-3 column, *n*-hexane/2-propanol = 97: 3, flow rate: 0.7 ml/min,  $\lambda$  = 280 nm, retention time: *t* (major) = 41.84 min, *t* (minor) = 47.50 min.

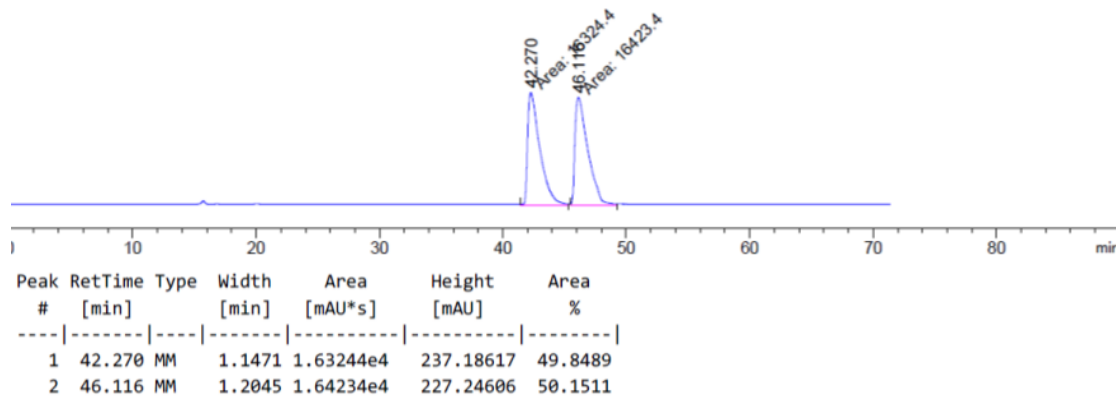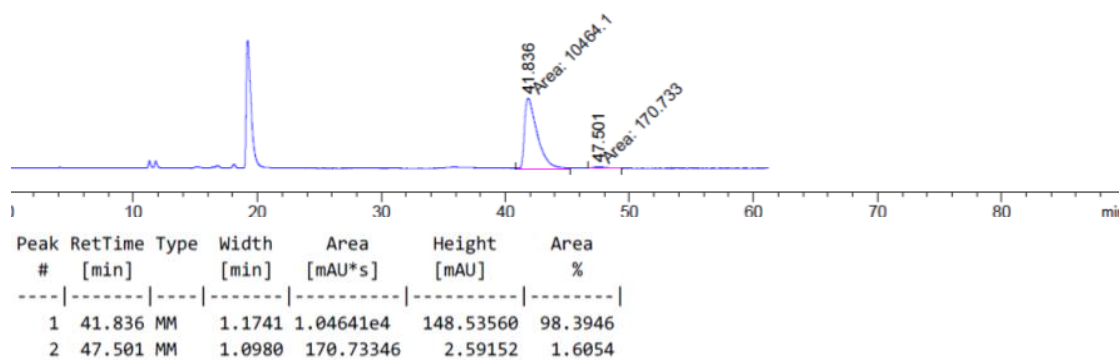

Chiral HPLC chromatographic analysis of C3-alkylated indole of **5d**

Condition: chiral OD-3 column, *n*-hexane/2-propanol = 99: 1, flow rate: 0.3 ml/min,  $\lambda$  = 280 nm, retention time: t (major) = 84.21 min, t (minor) = 77.85 min.

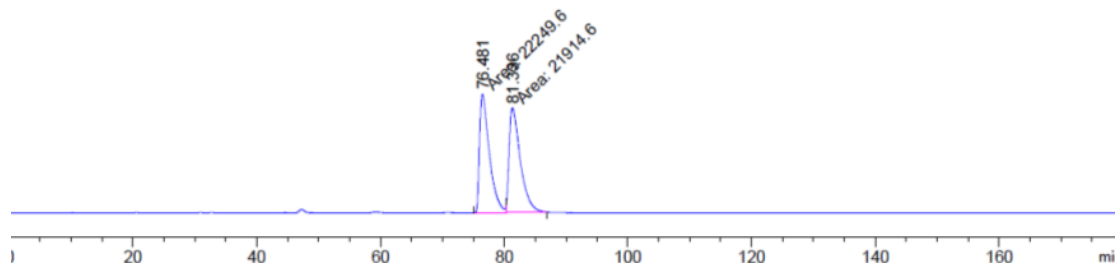

| Peak # | RetTime [min] | Type | Width [min] | Area [mAU*s] | Height [mAU] | Area %  |
|--------|---------------|------|-------------|--------------|--------------|---------|
| 1      | 76.481        | MM   | 1.8498      | 2.22496e4    | 200.46718    | 50.3793 |
| 2      | 81.336        | MM   | 2.0843      | 2.19146e4    | 175.23637    | 49.6207 |

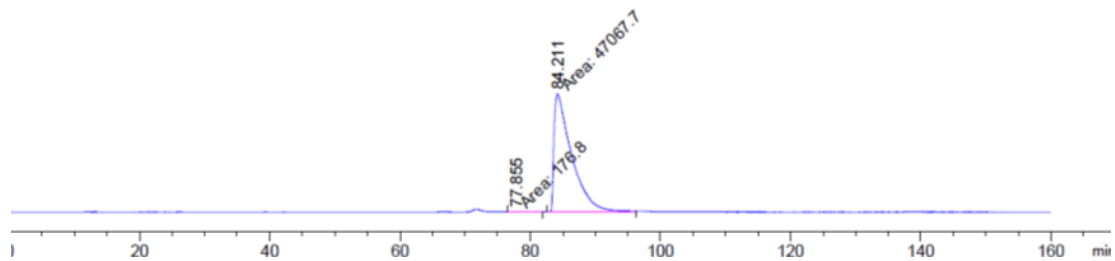

| Peak # | RetTime [min] | Type | Width [min] | Area [mAU*s] | Height [mAU] | Area %  |
|--------|---------------|------|-------------|--------------|--------------|---------|
| 1      | 77.855        | MM   | 4.2443      | 176.79971    | 6.94257e-1   | 0.3742  |
| 2      | 84.211        | MM   | 3.1752      | 4.70677e4    | 247.06026    | 99.6258 |

### Chiral HPLC chromatographic analysis of C3-alkylated indole of **5e**

Condition: chiral AD-3 column, *n*-hexane/2-propanol = 90: 10, flow rate: 1 ml/min,  $\lambda = 280$  nm, retention time: *t* (major) = 20.01 min, *t* (minor) = 32.17 min.

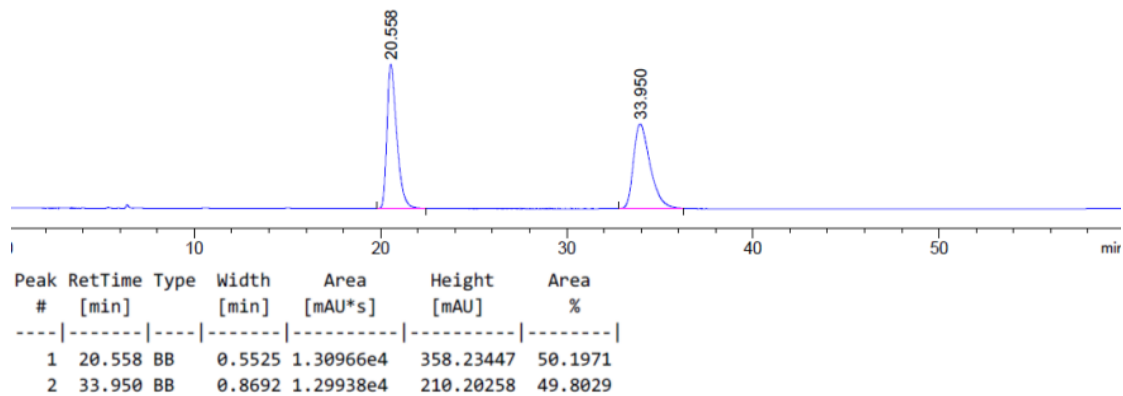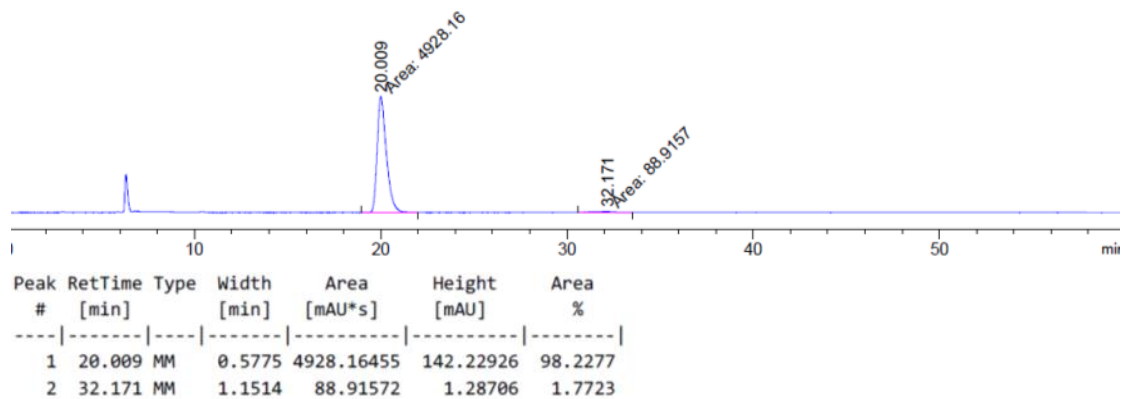



Chiral HPLC chromatographic analysis of C3-alkylated indole of **5f**

Condition: chiral AD-3 column, *n*-hexane/2-propanol = 93: 7, flow rate: 1 ml/min,  $\lambda = 280$  nm, retention time: *t* (major) = 16.17 min, *t* (minor) = 24.09 min.

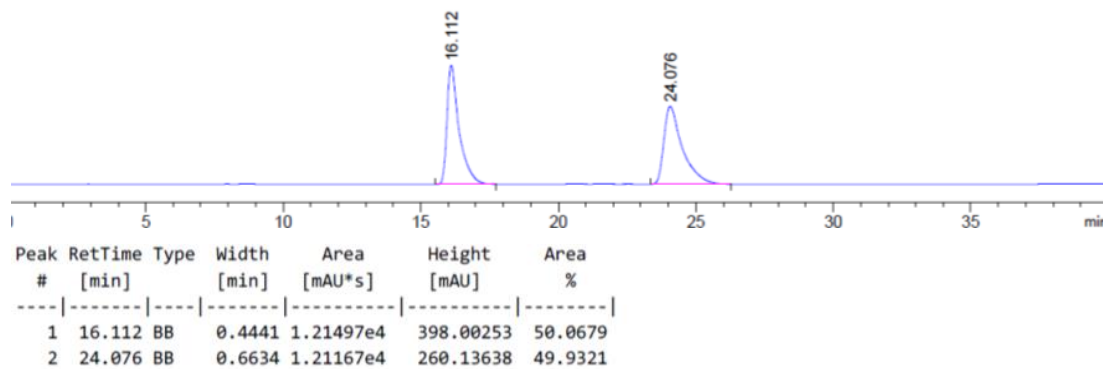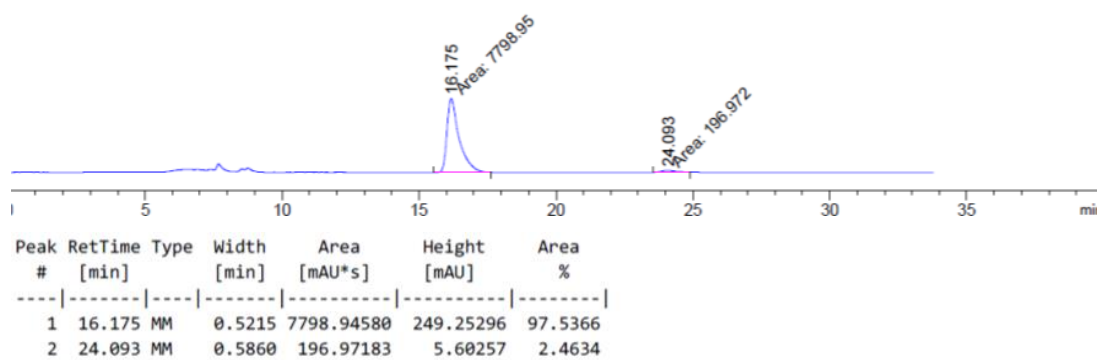

Chiral HPLC chromatographic analysis of C3-alkylated indole of **5g**

Condition: chiral AD-3 column, *n*-hexane/2-propanol = 90: 10, flow rate: 0.7 ml/min,  $\lambda$  = 230 nm, retention time: *t* (major) = 15.48 min, *t* (minor) = 23.03 min.

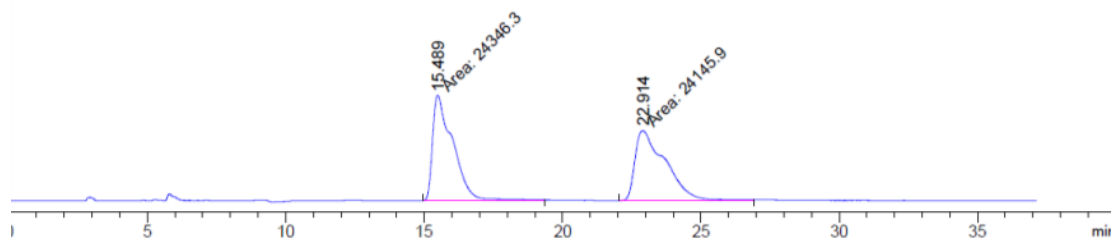

| Peak # | RetTime [min] | Type | Width [min] | Area [mAU*s] | Height [mAU] | Area %  |
|--------|---------------|------|-------------|--------------|--------------|---------|
| 1      | 15.489        | MM   | 0.8704      | 2.43463e4    | 466.17526    | 50.2067 |
| 2      | 22.914        | MM   | 1.2952      | 2.41459e4    | 310.72086    | 49.7933 |

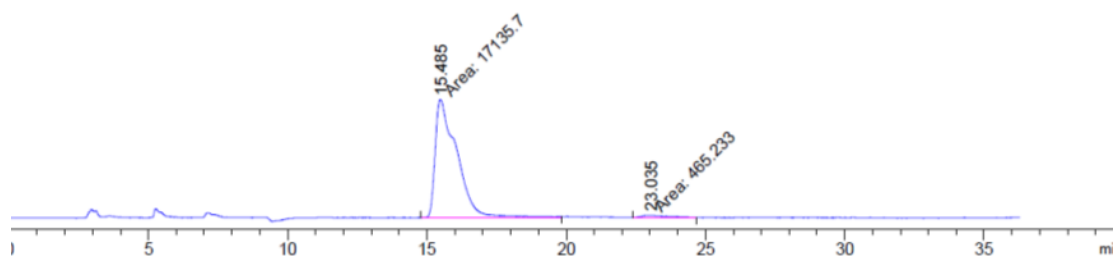

| Peak # | RetTime [min] | Type | Width [min] | Area [mAU*s] | Height [mAU] | Area %  |
|--------|---------------|------|-------------|--------------|--------------|---------|
| 1      | 15.485        | MM   | 0.9180      | 1.71357e4    | 311.10327    | 97.3568 |
| 2      | 23.035        | MM   | 1.2058      | 465.23312    | 6.43044      | 2.6432  |

Chiral HPLC chromatographic analysis of C3-alkylated indole of **5h**

Condition: chiral AD-3 column, *n*-hexane/2-propanol = 90: 10, flow rate: 1 ml/min,  $\lambda = 280$  nm, retention time: *t* (major) = 21.60 min, *t* (minor) = 37.26 min.

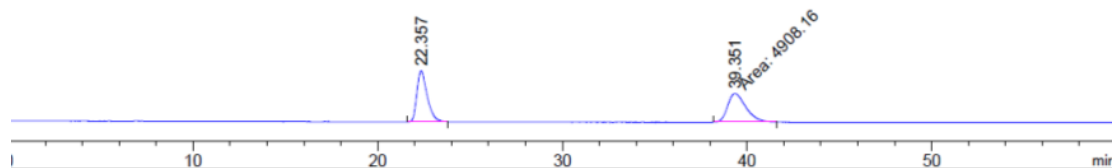

| Peak # | RetTime [min] | Type | Width [min] | Area [mAU*s] | Height [mAU] | Area %  |
|--------|---------------|------|-------------|--------------|--------------|---------|
| 1      | 22.357        | BB   | 0.5823      | 4960.85938   | 127.95944    | 50.2670 |
| 2      | 39.351        | MM   | 1.1398      | 4908.15576   | 71.76692     | 49.7330 |

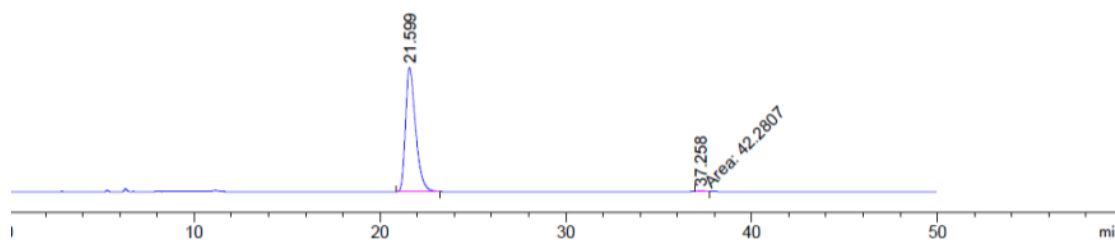

| Peak # | RetTime [min] | Type | Width [min] | Area [mAU*s] | Height [mAU] | Area %  |
|--------|---------------|------|-------------|--------------|--------------|---------|
| 1      | 21.599        | BV   | 0.5651      | 1.17104e4    | 309.73575    | 99.6402 |
| 2      | 37.258        | MM   | 0.5733      | 42.28070     | 1.22927      | 0.3598  |

Chiral HPLC chromatographic analysis of C3-alkylated indole of **5i**

Condition: chiral AD-3 column, *n*-hexane/2-propanol = 93: 7, flow rate: 0.8 ml/min,  $\lambda$  = 280 nm, retention time: *t* (major) = 13.34 min, *t* (minor) = 15.00 min.

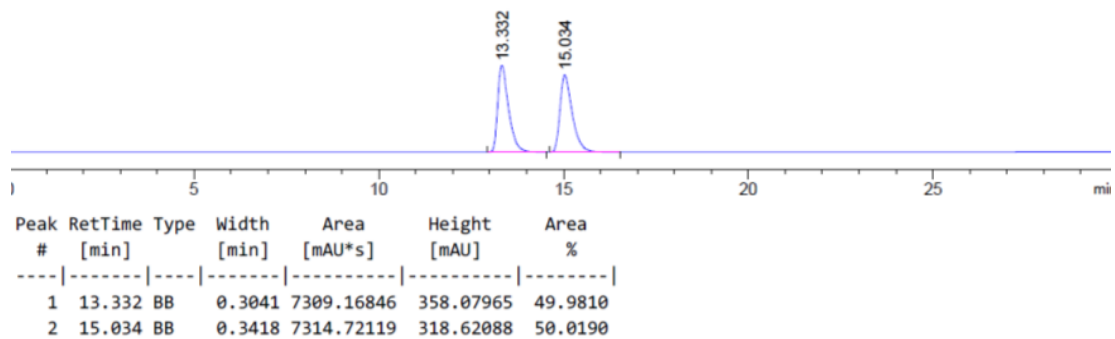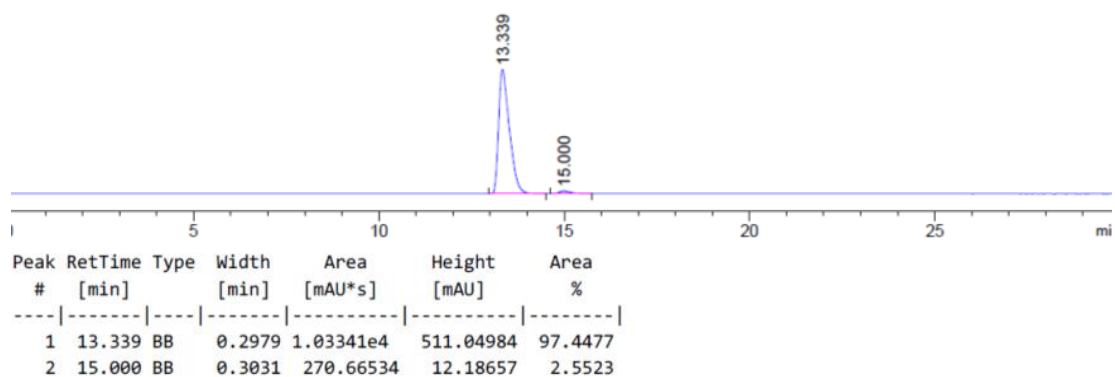

Chiral HPLC chromatographic analysis of C3-alkylated indole of **5j**

Condition: chiral OD-3 column, *n*-hexane/2-propanol = 94: 6, flow rate: 0.7 ml/min,  $\lambda = 280$  nm, retention time: *t* (major) = 62.08 min, *t* (minor) = 59.24 min.

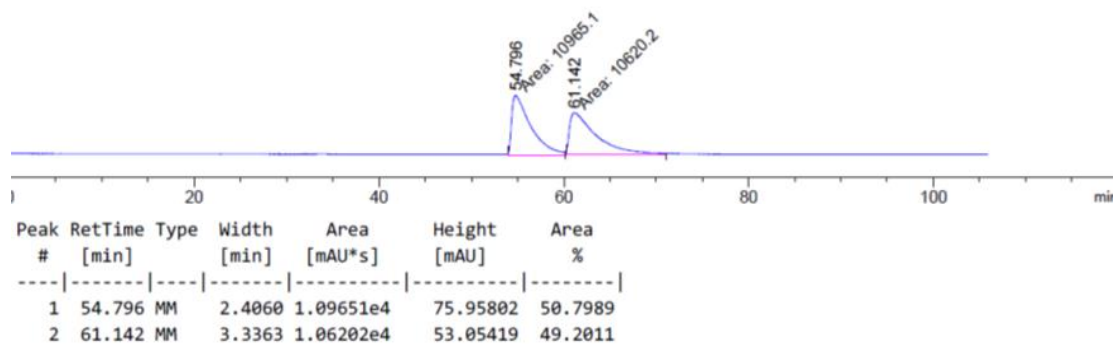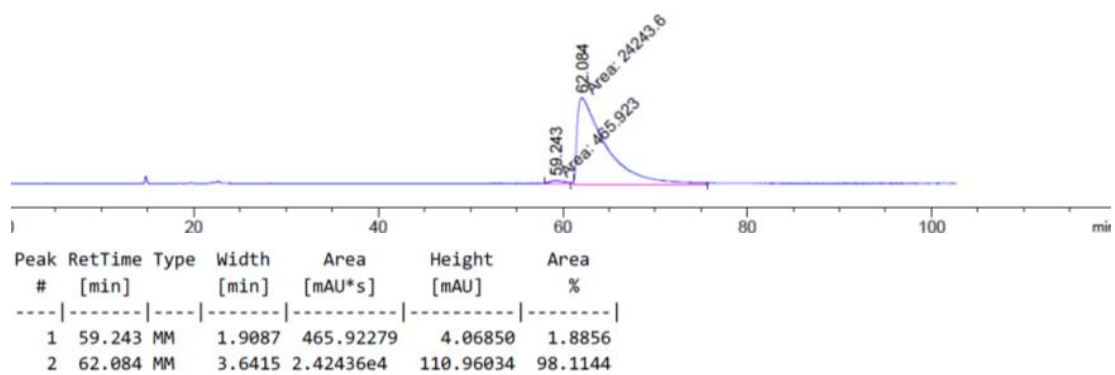

Chiral HPLC chromatographic analysis of C3-alkylated indole of **5k**

Condition: chiral OD-3 column, *n*-hexane/2-propanol = 98: 2, flow rate: 0.5 ml/min,  $\lambda$  = 280 nm, retention time: t (major) = 91.67 min, t (minor) = 87.50 min.

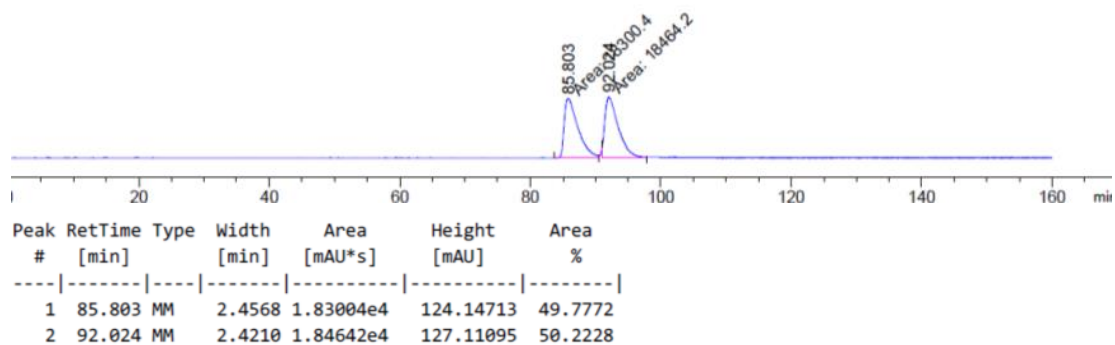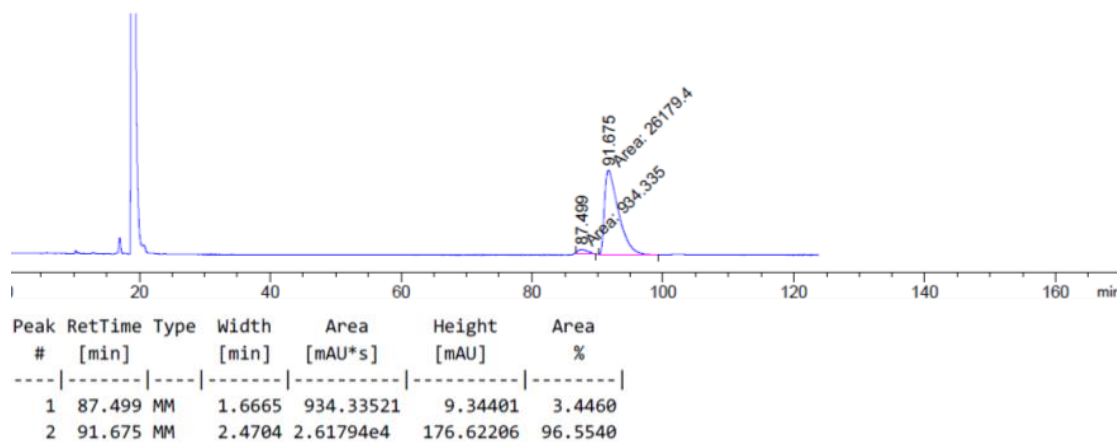

Chiral HPLC chromatographic analysis of C3-alkylated indole of **51**

Condition: chiral AD-3 column, *n*-hexane/2-propanol = 90: 10, flow rate: 1 ml/min,  $\lambda$  = 280 nm, retention time: *t* (major) = 12.22 min, *t* (minor) = 16.86 min.

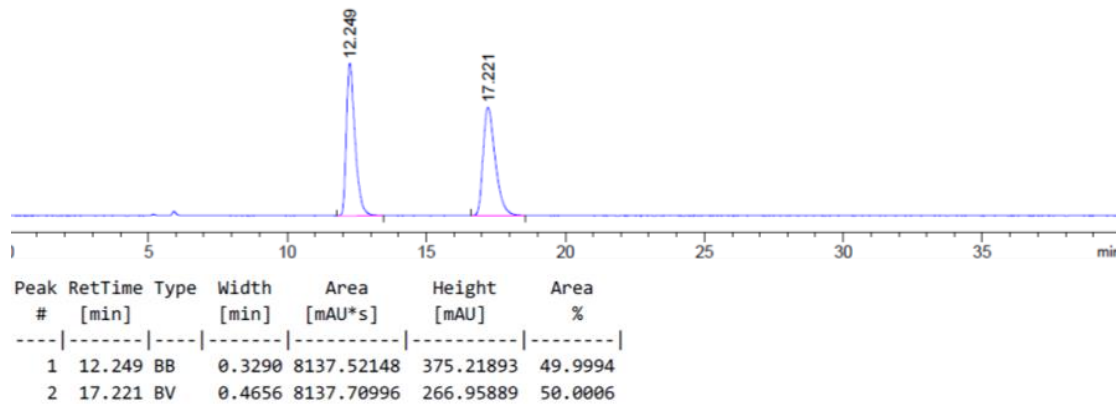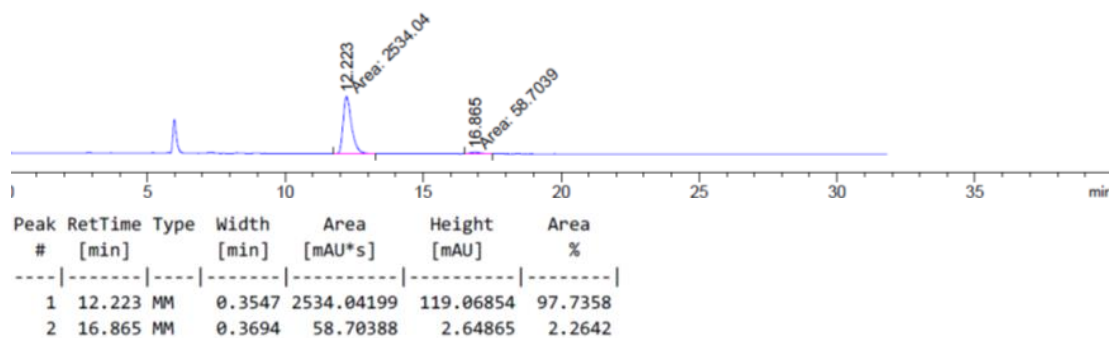

### Chiral HPLC chromatographic analysis of C3-alkylated indole of **5m**

Condition: chiral OD-3 column, *n*-hexane/2-propanol = 90: 10, flow rate: 0.7 ml/min,  $\lambda = 280$  nm, retention time: *t* (major) = 43.40 min, *t* (minor) = 34.07 min.

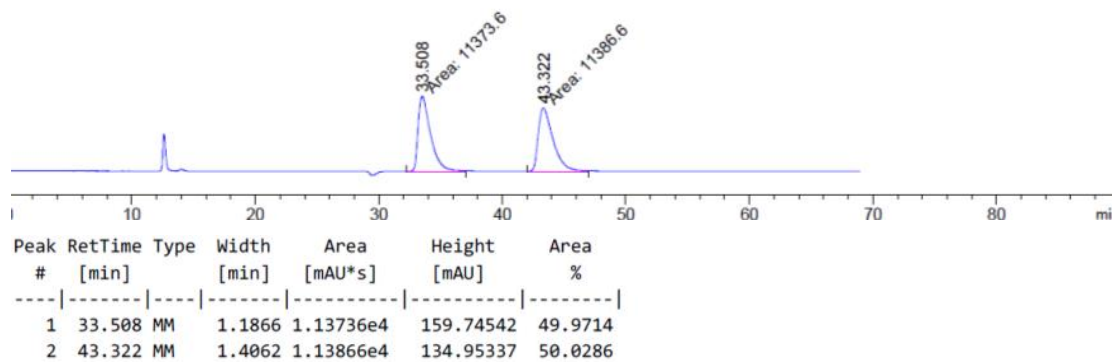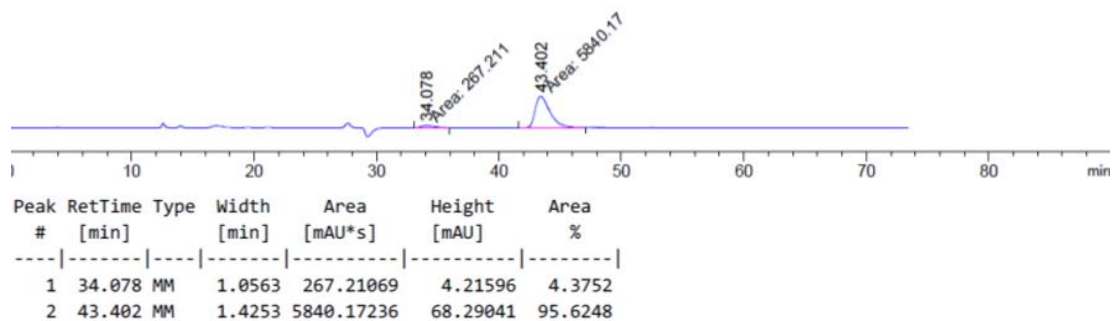



Chiral HPLC chromatographic analysis of C2-alkylated indole of **6a**

Condition: chiral AD-3 column, *n*-hexane/2-propanol = 95: 5, flow rate: 1 ml/min,  $\lambda$  = 280 nm, retention time: t (major) = 14.93 min, t (minor) = 21.75 min.

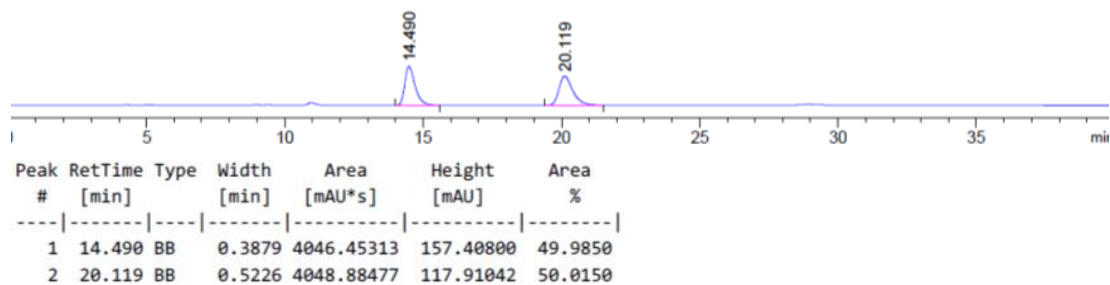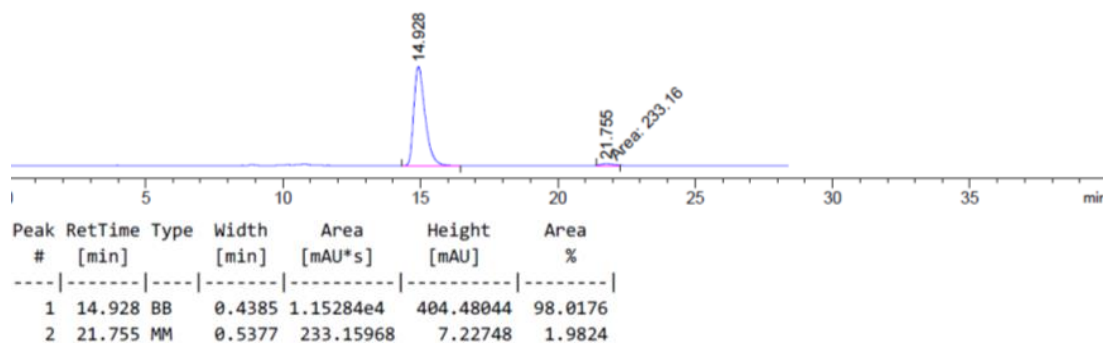

### Chiral HPLC chromatographic analysis of C2-alkylated indole of **6b**

Condition: chiral AD-3 column, *n*-hexane/2-propanol = 92: 8, flow rate: 1 ml/min,  $\lambda = 280$  nm, retention time: *t* (major) = 17.75 min, *t* (minor) = 24.24 min.

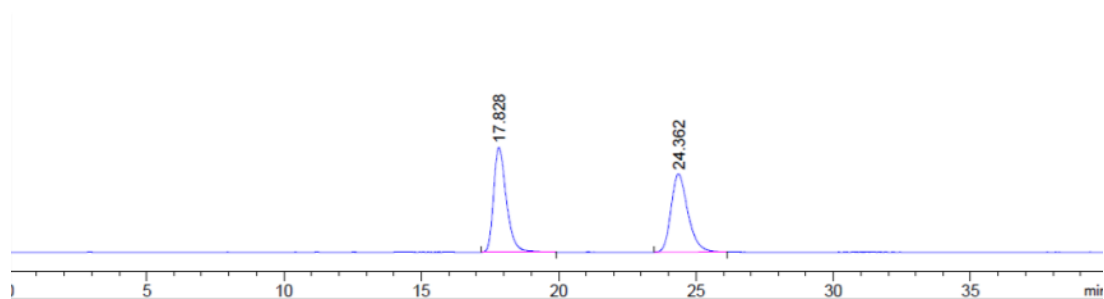

| Peak # | RetTime [min] | Type | Width [min] | Area [mAU*s] | Height [mAU] | Area %  |
|--------|---------------|------|-------------|--------------|--------------|---------|
| 1      | 17.828        | VB   | 0.4912      | 1.42089e4    | 439.49539    | 50.3947 |
| 2      | 24.362        | BB   | 0.6334      | 1.39864e4    | 328.04382    | 49.6053 |

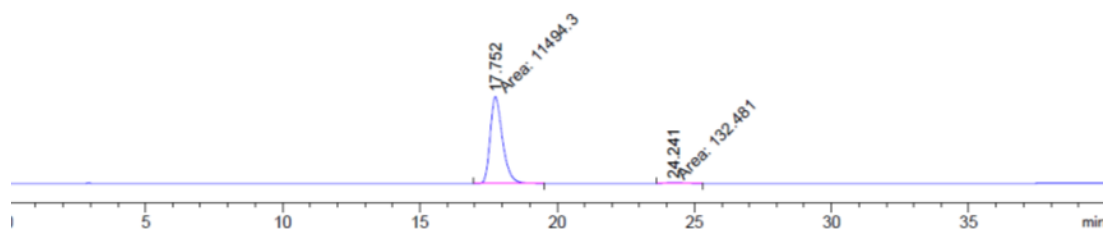

| Peak # | RetTime [min] | Type | Width [min] | Area [mAU*s] | Height [mAU] | Area %  |
|--------|---------------|------|-------------|--------------|--------------|---------|
| 1      | 17.752        | MM   | 0.5249      | 1.14943e4    | 364.93936    | 98.8606 |
| 2      | 24.241        | MM   | 0.5566      | 132.48140    | 3.96684      | 1.1394  |

### Chiral HPLC chromatographic analysis of C2-alkylated indole of **6c**

Condition: chiral AD-3 column, *n*-hexane/2-propanol = 95: 5, flow rate: 0.5 ml/min,  $\lambda$  = 280 nm, retention time: t (major) = 21.51 min, t (minor) = 34.36 min.

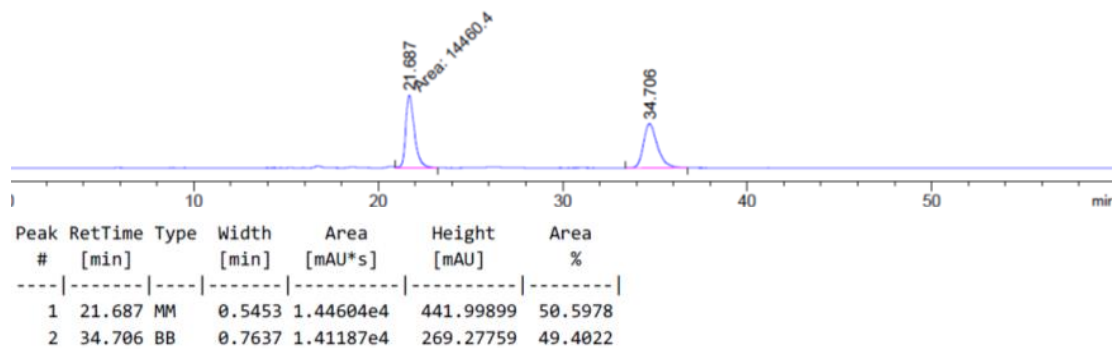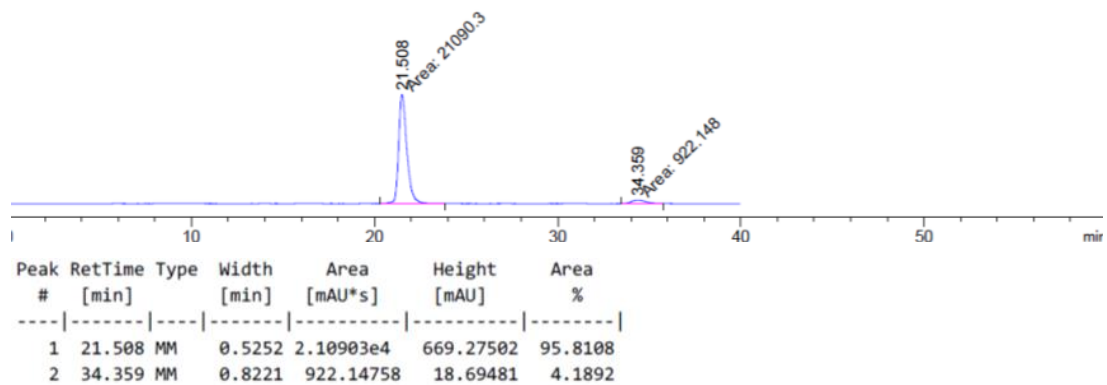

### Chiral HPLC chromatographic analysis of C2-alkylated indole of **6d**

Condition: chiral OD-3 column, *n*-hexane/2-propanol = 90: 10, flow rate: 1 ml/min,  $\lambda = 280$  nm, retention time: *t* (major) = 19.63 min, *t* (minor) = 9.47 min.

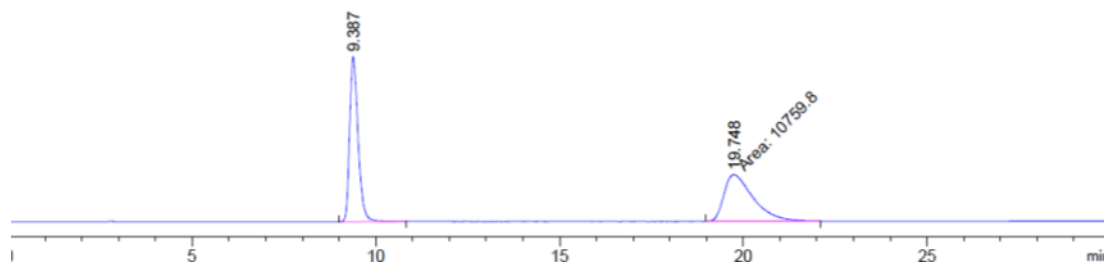

| Peak # | RetTime [min] | Type | Width [min] | Area [mAU*s] | Height [mAU] | Area %  |
|--------|---------------|------|-------------|--------------|--------------|---------|
| 1      | 9.387         | BB   | 0.2472      | 1.08740e4    | 677.67993    | 50.2638 |
| 2      | 19.748        | MM   | 0.9347      | 1.07598e4    | 191.86763    | 49.7362 |

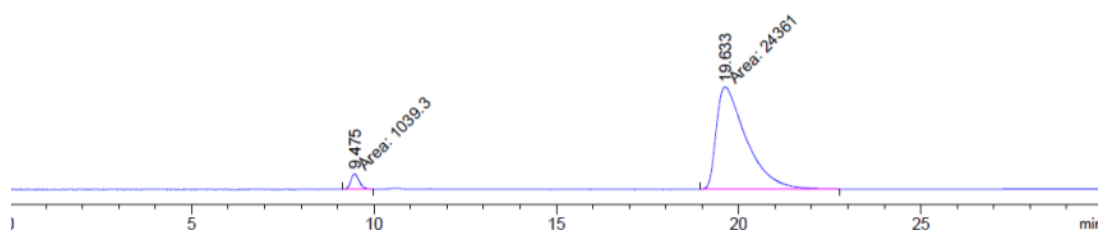

| Peak # | RetTime [min] | Type | Width [min] | Area [mAU*s] | Height [mAU] | Area %  |
|--------|---------------|------|-------------|--------------|--------------|---------|
| 1      | 9.475         | MM   | 0.2709      | 1039.29956   | 63.93324     | 4.0917  |
| 2      | 19.633        | MM   | 0.9615      | 2.43610e4    | 422.26038    | 95.9083 |

Chiral HPLC chromatographic analysis of C2-alkylated indole of **6e**

Condition: chiral AD-3 column, *n*-hexane/2-propanol = 95: 5, flow rate: 1 ml/min,  $\lambda = 280$  nm, retention time: *t* (major) = 12.56 min, *t* (minor) = 22.24 min.

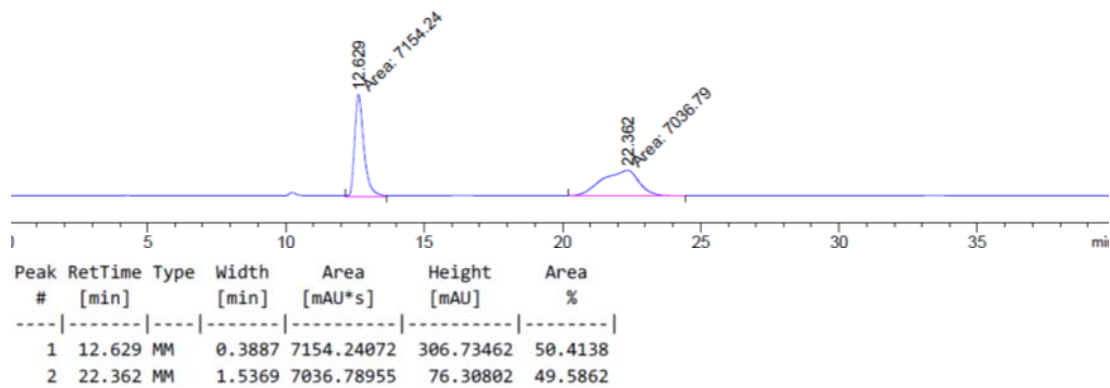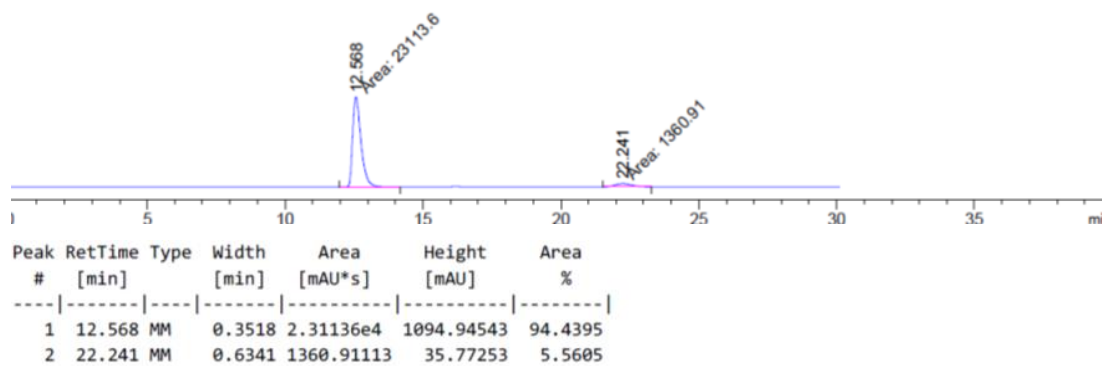

Chiral HPLC chromatographic analysis of C2-alkylated indole of **6f**

Condition: chiral AD-H column, *n*-hexane/2-propanol = 90: 10, flow rate: 1 ml/min,  $\lambda = 220$  nm, retention time: t (major) = 47.39 min, t (minor) = 40.41 min.

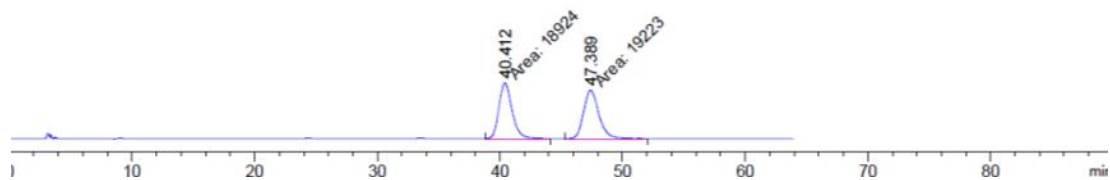

| Peak # | RetTime [min] | Type | Width [min] | Area [mAU*s] | Height [mAU] | Area %  |
|--------|---------------|------|-------------|--------------|--------------|---------|
| 1      | 40.412        | MM   | 1.2744      | 1.89240e4    | 247.49606    | 49.6081 |
| 2      | 47.389        | MM   | 1.4887      | 1.92230e4    | 215.20364    | 50.3919 |

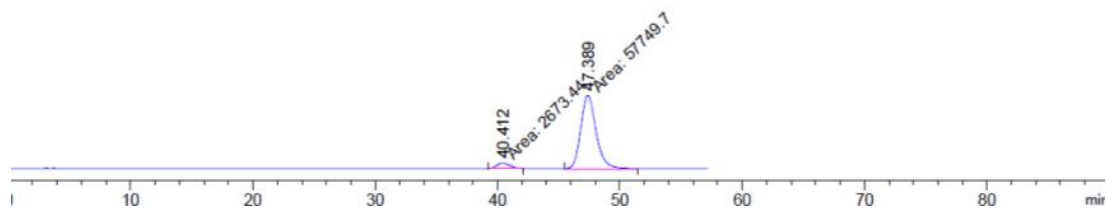

| Peak # | RetTime [min] | Type | Width [min] | Area [mAU*s] | Height [mAU] | Area %  |
|--------|---------------|------|-------------|--------------|--------------|---------|
| 1      | 40.412        | MM   | 1.0106      | 2673.43677   | 44.08809     | 4.4245  |
| 2      | 47.389        | MM   | 1.4729      | 5.77497e4    | 653.45898    | 95.5755 |

Chiral HPLC chromatographic analysis of C2-alkylated indole of **6g**

Condition: chiral AD-H column, *n*-hexane/2-propanol = 85: 15, flow rate: 1 ml/min,  $\lambda$  = 220 nm, retention time: t (major) = 26.73 min, t (minor) = 18.48 min.

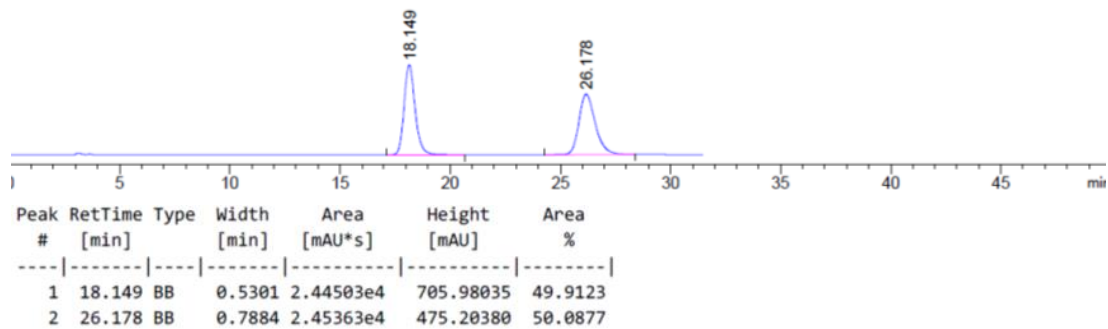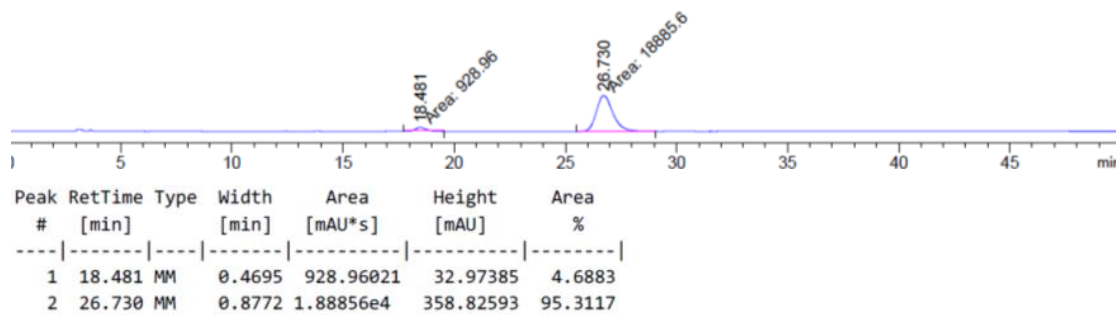

Chiral HPLC chromatographic analysis of C2-alkylated indole of **6h**

Condition: chiral AD-H column, *n*-hexane/2-propanol = 85: 15, flow rate: 1 ml/min,  $\lambda = 220$  nm, retention time: *t* (major) = 56.75 min, *t* (minor) = 38.95 min.

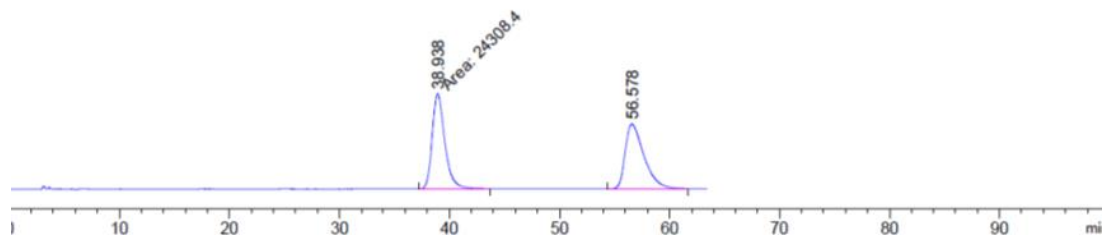

| Peak # | RetTime [min] | Type | Width [min] | Area [mAU*s] | Height [mAU] | Area %  |
|--------|---------------|------|-------------|--------------|--------------|---------|
| 1      | 38.938        | MM   | 1.3428      | 2.43084e4    | 301.72333    | 49.9656 |
| 2      | 56.578        | BB   | 1.7089      | 2.43419e4    | 205.65544    | 50.0344 |

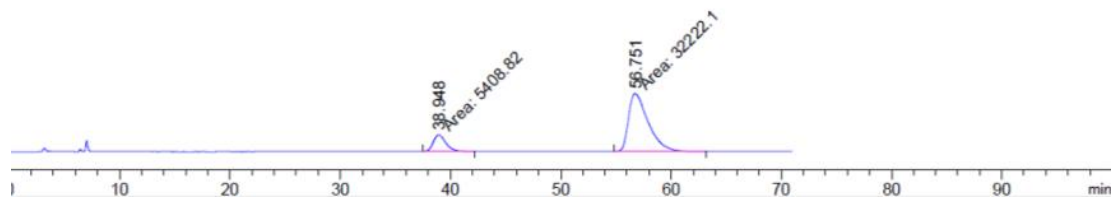

| Peak # | RetTime [min] | Type | Width [min] | Area [mAU*s] | Height [mAU] | Area %  |
|--------|---------------|------|-------------|--------------|--------------|---------|
| 1      | 38.948        | MM   | 1.2392      | 5408.81982   | 72.74702     | 14.3733 |
| 2      | 56.751        | MM   | 2.0516      | 3.22221e4    | 261.77008    | 85.6267 |



Chiral HPLC chromatographic analysis of C2-alkylated indole of **6i**

Condition: chiral AD-3 column, *n*-hexane/2-propanol = 82: 8, flow rate: 1 ml/min,  $\lambda = 280$  nm, retention time: *t* (major) = 11.75 min, *t* (minor) = 22.91 min.

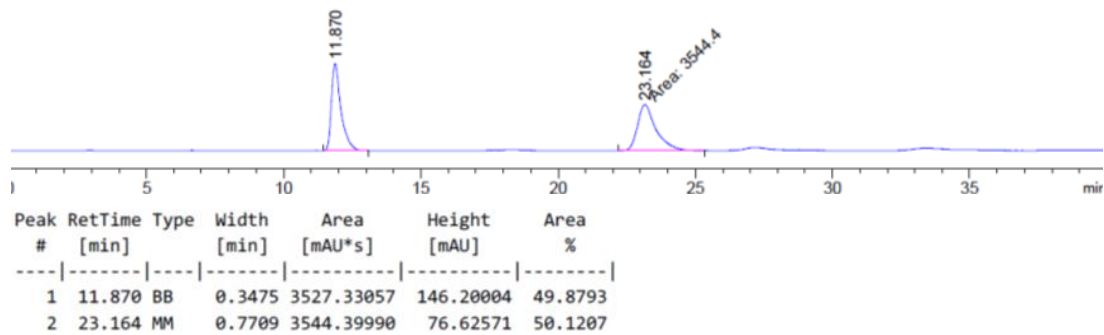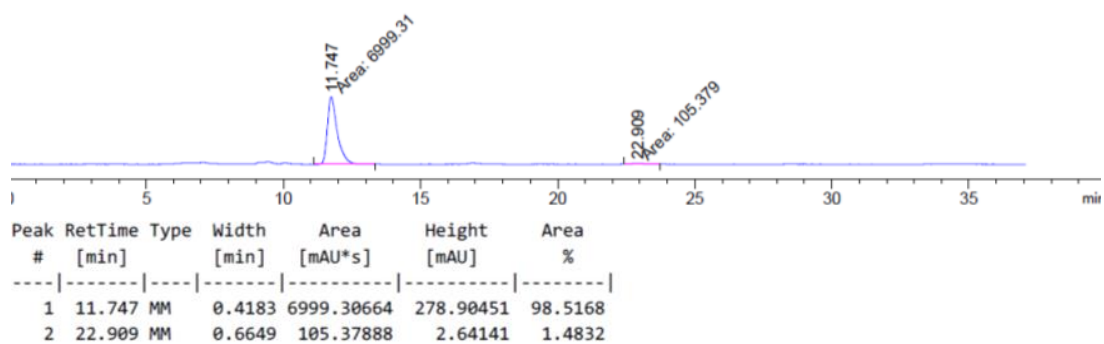

### Chiral HPLC chromatographic analysis of C2-alkylated indole of **6j**

Condition: chiral AD-H column, *n*-hexane/2-propanol = 95: 5, flow rate: 0.8 ml/min,  $\lambda = 220$  nm, retention time: *t* (major) = 14.22 min, *t* (minor) = 23.42 min.

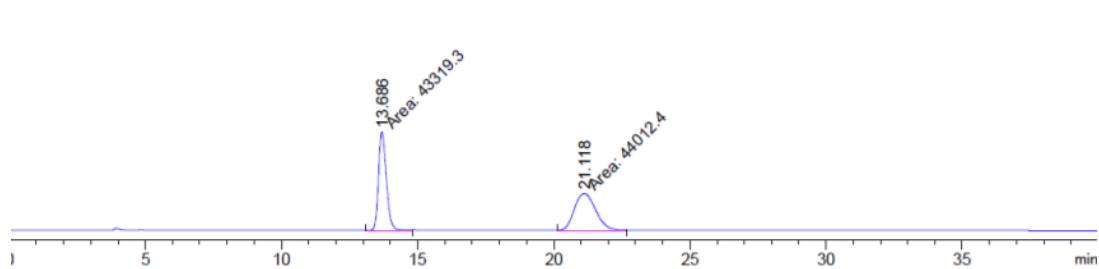

| Peak # | RetTime [min] | Type | Width [min] | Area [mAU*s] | Height [mAU] | Area %  |
|--------|---------------|------|-------------|--------------|--------------|---------|
| 1      | 13.686        | MM   | 0.3344      | 4.33193e4    | 2159.02124   | 49.6032 |
| 2      | 21.118        | MM   | 0.9138      | 4.40124e4    | 802.73938    | 50.3968 |

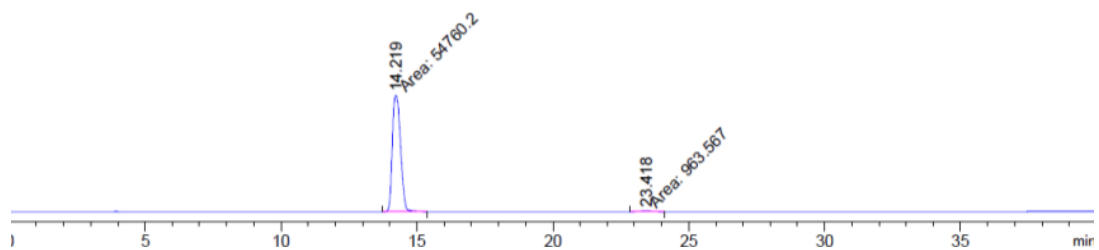

| Peak # | RetTime [min] | Type | Width [min] | Area [mAU*s] | Height [mAU] | Area %  |
|--------|---------------|------|-------------|--------------|--------------|---------|
| 1      | 14.219        | MM   | 0.3533      | 5.47602e4    | 2583.51611   | 98.2708 |
| 2      | 23.418        | MM   | 0.7551      | 963.56677    | 21.26761     | 1.7292  |

Chiral HPLC chromatographic analysis of C2-alkylated indole of **6k**

Condition: chiral AD-H column, *n*-hexane/2-propanol = 90: 10, flow rate: 1 ml/min,  $\lambda$  = 254 nm, retention time: t (major) = 9.17 min, t (minor) = 25.39 min.

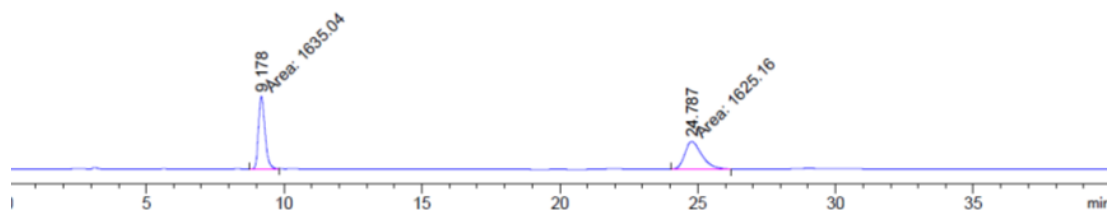

| Peak # | RetTime [min] | Type | Width [min] | Area [mAU*s] | Height [mAU] | Area %  |
|--------|---------------|------|-------------|--------------|--------------|---------|
| 1      | 9.178         | MM   | 0.2751      | 1635.03674   | 99.04852     | 50.1515 |
| 2      | 24.787        | MM   | 0.7231      | 1625.16113   | 37.45817     | 49.8485 |

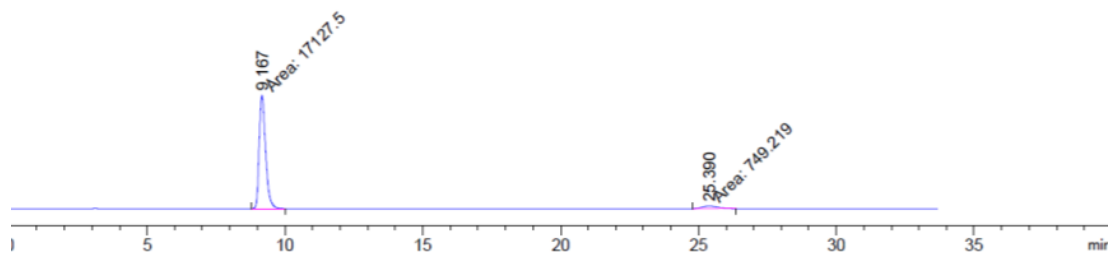

| Peak # | RetTime [min] | Type | Width [min] | Area [mAU*s] | Height [mAU] | Area %  |
|--------|---------------|------|-------------|--------------|--------------|---------|
| 1      | 9.167         | MM   | 0.2758      | 1.71275e4    | 1035.15576   | 95.8090 |
| 2      | 25.390        | MM   | 0.6118      | 749.21936    | 20.41064     | 4.1910  |

Chiral HPLC chromatographic analysis of C2-alkylated indole of **61**

Condition: chiral OD-H column, *n*-hexane/2-propanol = 98: 2, flow rate: 0.5 ml/min,  $\lambda = 230$  nm, retention time: t (major) = 43.49 min, t (minor) = 48.77 min.

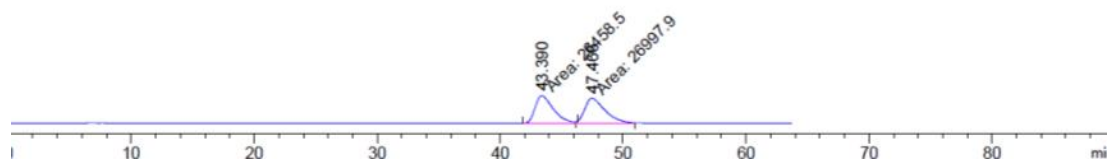

| Peak # | RetTime [min] | Type | Width [min] | Area [mAU*s] | Height [mAU] | Area %  |
|--------|---------------|------|-------------|--------------|--------------|---------|
| 1      | 43.388        | BV   | 1.3783      | 5453.89258   | 53.36655     | 49.5881 |
| 2      | 47.466        | VB   | 1.5324      | 5544.49609   | 48.47564     | 50.4119 |

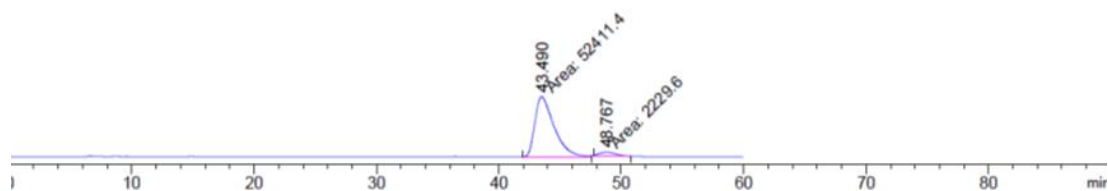

| Peak # | RetTime [min] | Type | Width [min] | Area [mAU*s] | Height [mAU] | Area %  |
|--------|---------------|------|-------------|--------------|--------------|---------|
| 1      | 43.490        | MM   | 1.8439      | 5.24114e4    | 473.74878    | 95.9195 |
| 2      | 48.767        | MM   | 1.4584      | 2229.60229   | 25.47966     | 4.0805  |

Chiral HPLC chromatographic analysis of N1-alkylated indole of **7a**

Condition: chiral AD-3 column, *n*-hexane/2-propanol = 95: 5, flow rate: 1 ml/min,  $\lambda = 280$  nm, retention time: *t* (major) = 15.56 min, *t* (minor) = 18.71 min.

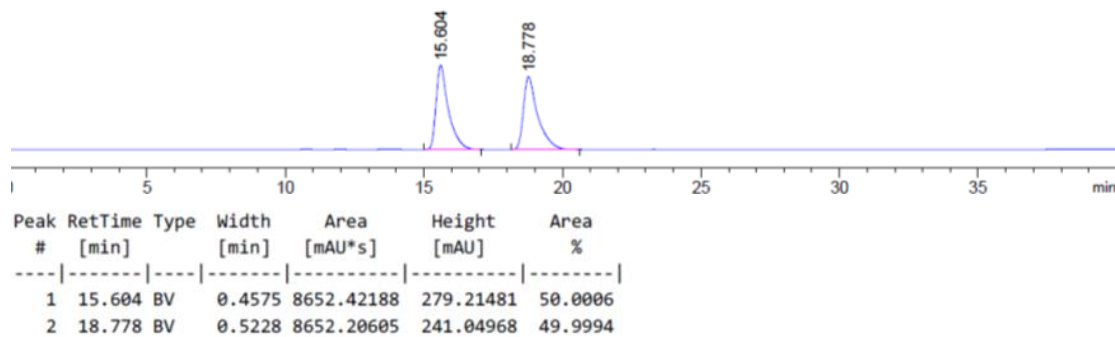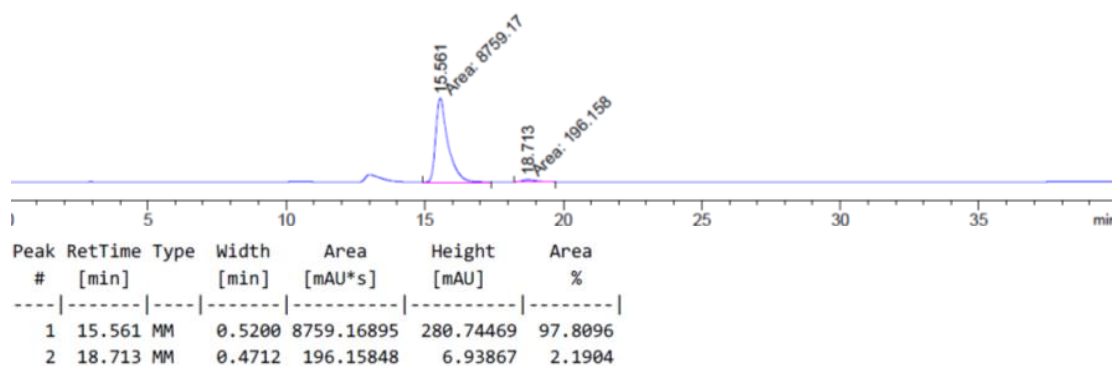

Chiral HPLC chromatographic analysis of N1-alkylated indole of **7b**

Condition: chiral AD-3 column, *n*-hexane/2-propanol = 92: 8, flow rate: 0.5 ml/min,  $\lambda = 280$  nm, retention time: *t* (major) = 18.49 min, *t* (minor) = 24.98 min.

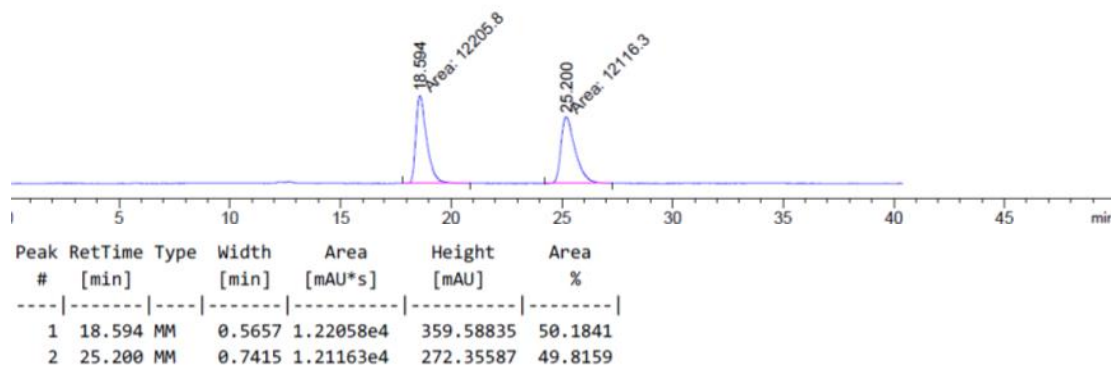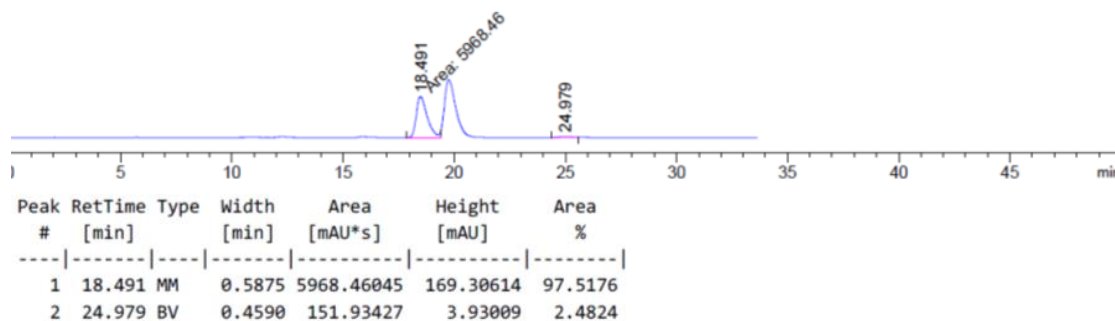

Chiral HPLC chromatographic analysis of C2-alkylated indole of **7b'**

Condition: chiral AD-3 column, *n*-hexane/2-propanol = 94: 6, flow rate: 1 ml/min,  $\lambda = 280$  nm, retention time: *t* (major) = 13.10 min, *t* (minor) = 20.54 min.

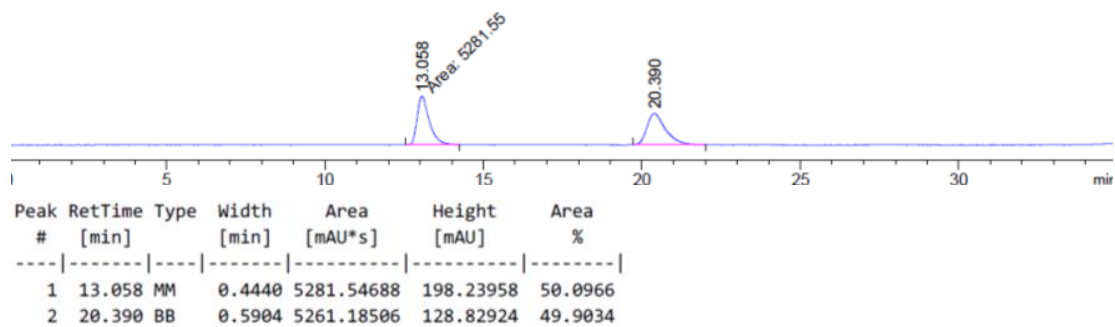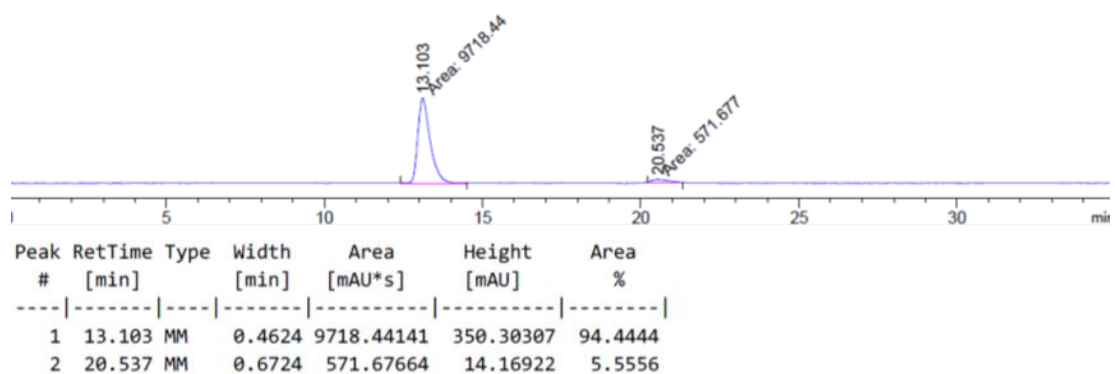

Chiral HPLC chromatographic analysis of N1-alkylated indole of **7c**

Condition: chiral AD-3 column, *n*-hexane/2-propanol = 90: 10, flow rate: 1 ml/min,  $\lambda = 280$  nm, retention time: t (major) = 30.22 min, t (minor) = 45.22 min.

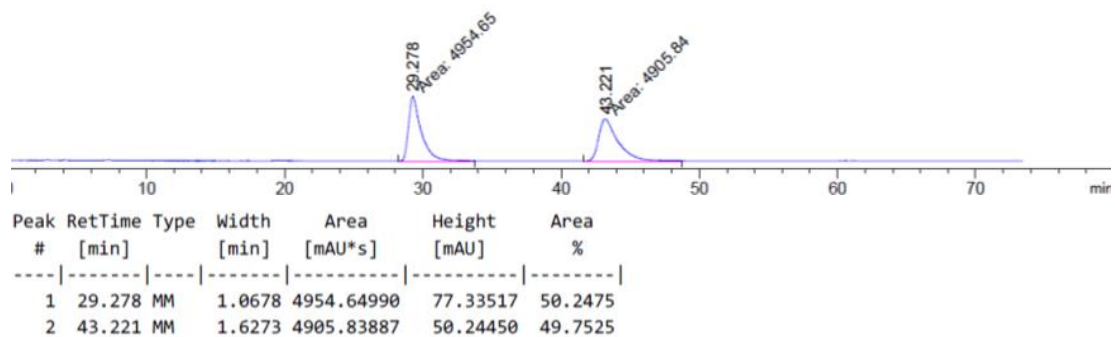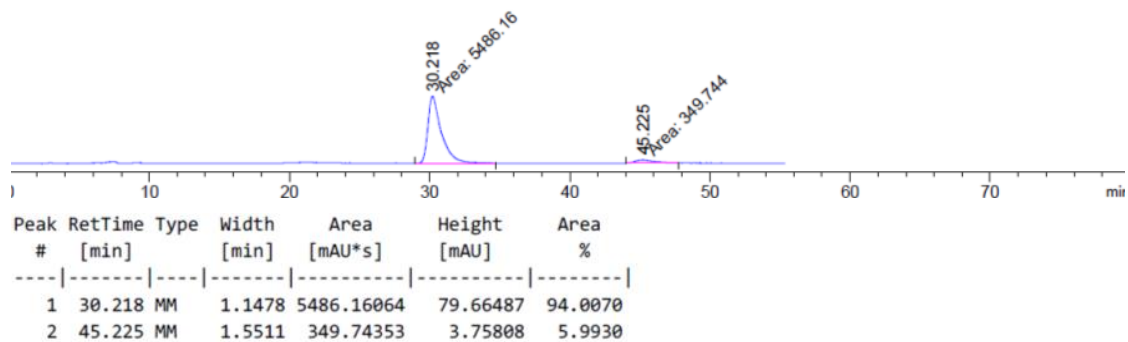



Chiral HPLC chromatographic analysis of N1-alkylated indole of **7d**

Condition: chiral AD-H column, *n*-hexane/2-propanol = 85: 15, flow rate: 1 ml/min,  $\lambda$  = 280 nm, retention time: t (major) = 19.09 min, t (minor) = 32.26 min.

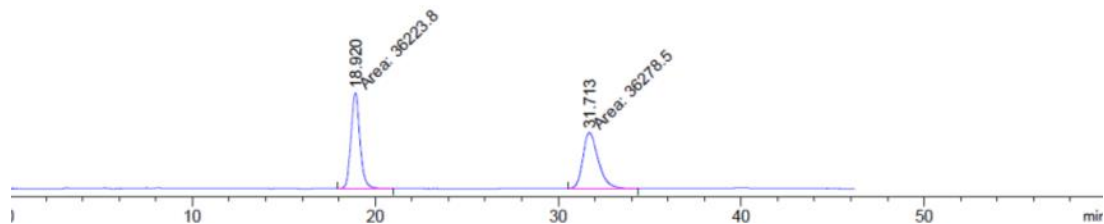

| Peak # | RetTime [min] | Type | Width [min] | Area [mAU*s] | Height [mAU] | Area %  |
|--------|---------------|------|-------------|--------------|--------------|---------|
| 1      | 18.920        | MM   | 0.5767      | 3.62238e4    | 1046.81250   | 49.9623 |
| 2      | 31.713        | MM   | 0.9881      | 3.62785e4    | 611.92621    | 50.0377 |

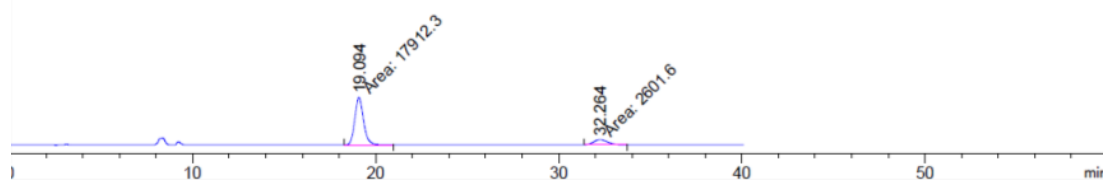

| Peak # | RetTime [min] | Type | Width [min] | Area [mAU*s] | Height [mAU] | Area %  |
|--------|---------------|------|-------------|--------------|--------------|---------|
| 1      | 19.094        | MM   | 0.5705      | 1.79123e4    | 523.30646    | 87.3179 |
| 2      | 32.264        | MM   | 0.8347      | 2601.59985   | 51.94750     | 12.6821 |

Chiral HPLC chromatographic analysis of N1-alkylated indole of **7e**

Condition: chiral AD-3 column, *n*-hexane/2-propanol = 95: 5, flow rate: 1 ml/min,  $\lambda = 280$  nm, retention time: *t* (major) = 28.67 min, *t* (minor) = 42.94 min.

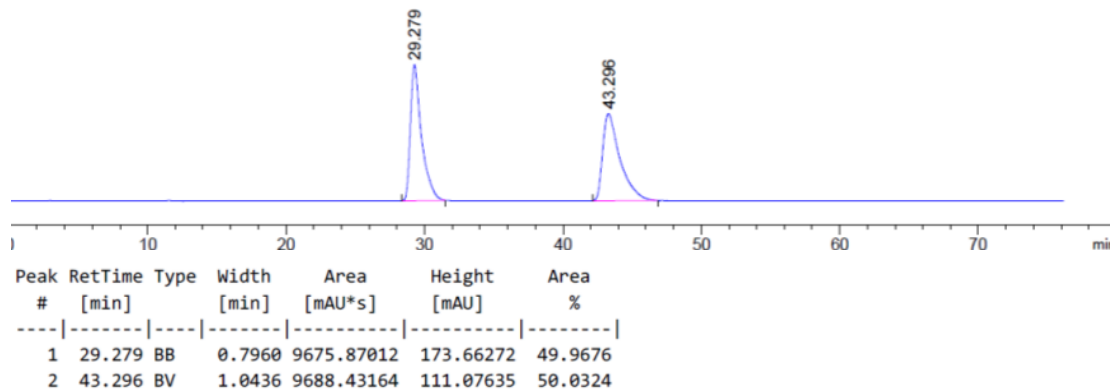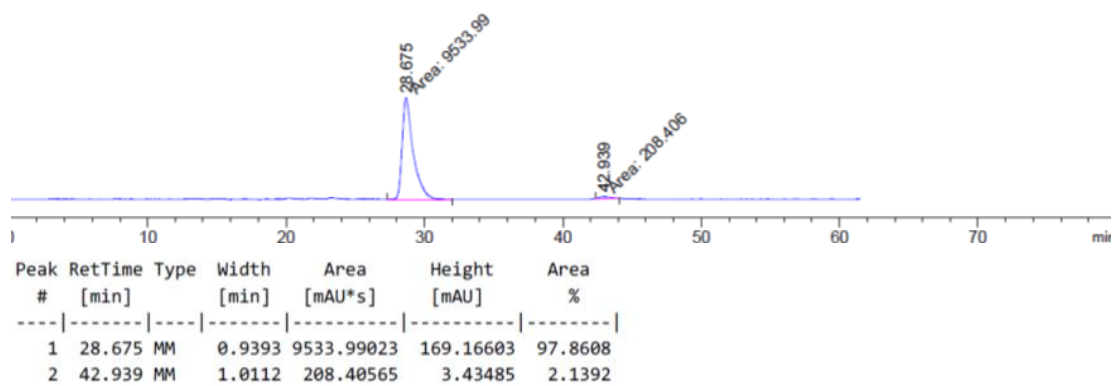

Chiral HPLC chromatographic analysis of N1-alkylated indole of **7f**

Condition: chiral AD-3 column, *n*-hexane/2-propanol = 96: 4, flow rate: 0.8 ml/min,  $\lambda$  = 280 nm, retention time: t (major) = 31.46 min, t (minor) = 49.55 min.

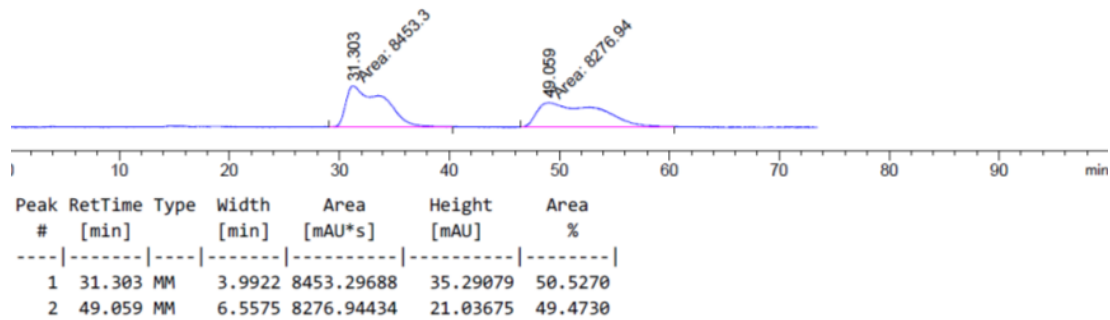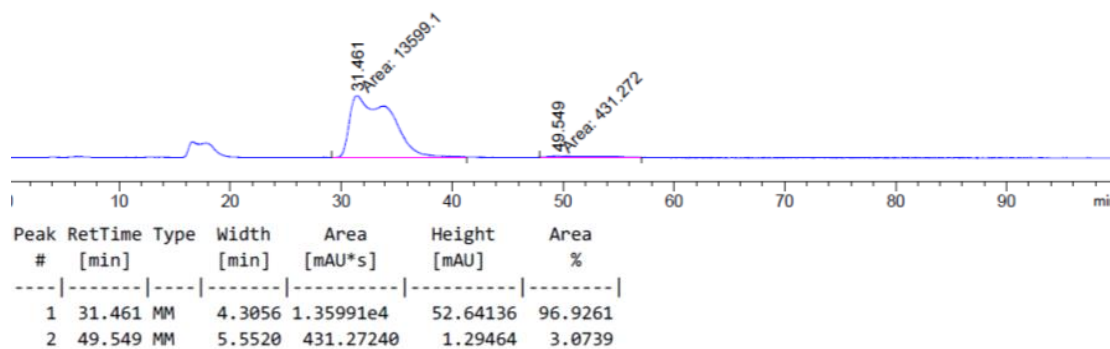

Chiral HPLC chromatographic analysis of N1-alkylated indole of **7g**

Condition: chiral AD-3 column, *n*-hexane/2-propanol = 94: 6, flow rate: 1 ml/min,  $\lambda = 280$  nm, retention time: *t* (major) = 10.31 min, *t* (minor) = 14.23 min.

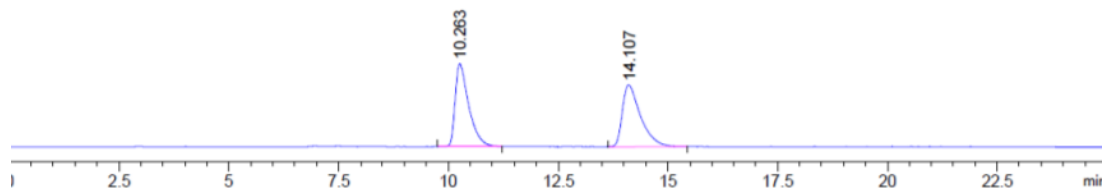

| Peak # | RetTime [min] | Type | Width [min] | Area [mAU*s] | Height [mAU] | Area %  |
|--------|---------------|------|-------------|--------------|--------------|---------|
| 1      | 10.263        | BB   | 0.3217      | 7368.64893   | 341.56470    | 50.0355 |
| 2      | 14.107        | BB   | 0.4305      | 7358.18164   | 255.14725    | 49.9645 |

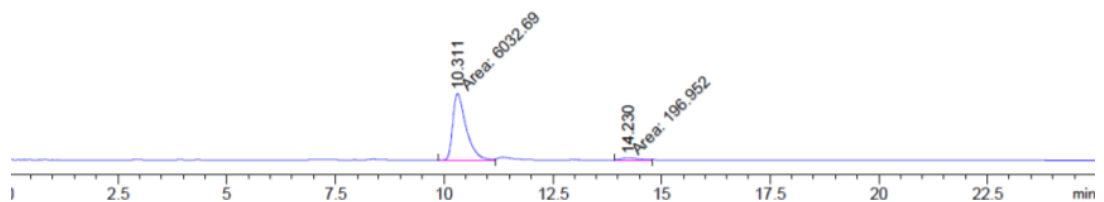

| Peak # | RetTime [min] | Type | Width [min] | Area [mAU*s] | Height [mAU] | Area %  |
|--------|---------------|------|-------------|--------------|--------------|---------|
| 1      | 10.311        | MM   | 0.3612      | 6032.68750   | 278.35477    | 96.8385 |
| 2      | 14.230        | MM   | 0.4272      | 196.95183    | 7.68345      | 3.1615  |

Chiral HPLC chromatographic analysis of N1-alkylated indole of **7h**

Condition: chiral OD-H column, *n*-hexane/2-propanol = 95: 5, flow rate: 0.6 ml/min,  $\lambda = 280$  nm, retention time:  $t$  (major) = 67.74 min,  $t$  (minor) = 76.88 min.

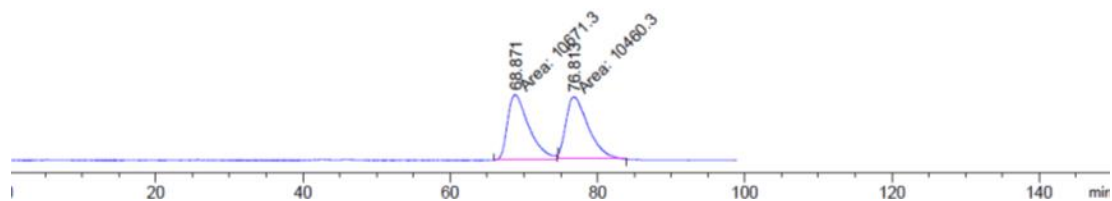

| Peak # | RetTime [min] | Type | Width [min] | Area [mAU*s] | Height [mAU] | Area %  |
|--------|---------------|------|-------------|--------------|--------------|---------|
| 1      | 68.871        | MM   | 3.3700      | 1.06713e4    | 52.77581     | 50.4993 |
| 2      | 76.813        | MM   | 3.4715      | 1.04603e4    | 50.22012     | 49.5007 |

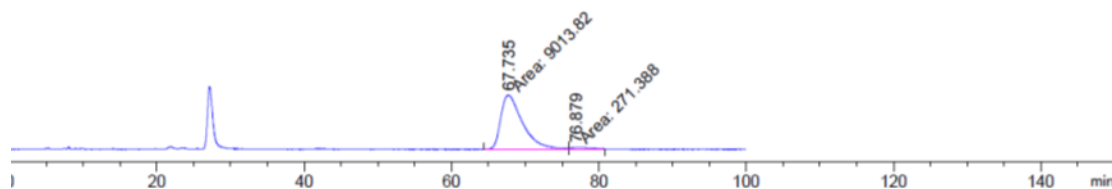

| Peak # | RetTime [min] | Type | Width [min] | Area [mAU*s] | Height [mAU] | Area %  |
|--------|---------------|------|-------------|--------------|--------------|---------|
| 1      | 67.735        | MM   | 3.4211      | 9013.81543   | 43.91257     | 97.0772 |
| 2      | 76.879        | MM   | 3.0459      | 271.38773    | 1.48499      | 2.9228  |

Chiral HPLC chromatographic analysis of N1-alkylated indole of **7i**

Condition: chiral AD-H column, *n*-hexane/2-propanol = 90: 10, flow rate: 1 ml/min,  $\lambda = 280$  nm, retention time: t (major) = 8.15 min, t (minor) = 10.70 min.

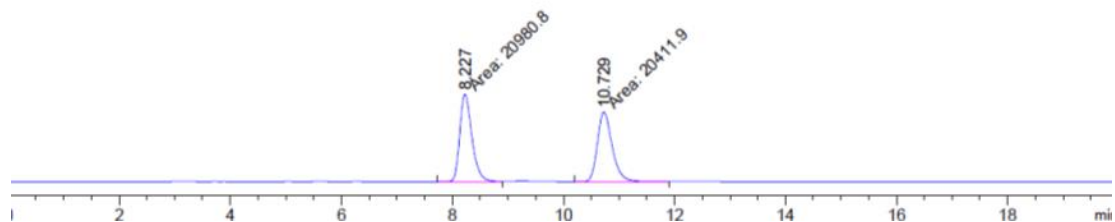

| Peak # | RetTime [min] | Type | Width [min] | Area [mAU*s] | Height [mAU] | Area %  |
|--------|---------------|------|-------------|--------------|--------------|---------|
| 1      | 8.227         | MM   | 0.2564      | 2.09808e4    | 1363.54358   | 50.6872 |
| 2      | 10.729        | MM   | 0.3130      | 2.04119e4    | 1086.91394   | 49.3128 |

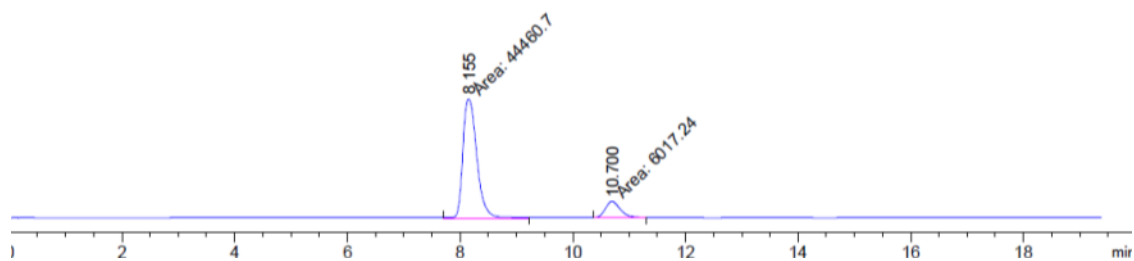

| Peak # | RetTime [min] | Type | Width [min] | Area [mAU*s] | Height [mAU] | Area %  |
|--------|---------------|------|-------------|--------------|--------------|---------|
| 1      | 8.155         | MM   | 0.2850      | 4.44607e4    | 2599.58765   | 88.0795 |
| 2      | 10.700        | MM   | 0.2913      | 6017.23828   | 344.24915    | 11.9205 |

### Chiral HPLC chromatographic analysis of C2-alkylated pyrrole of **9a**

Condition: chiral OD-3 column, *n*-hexane/2-propanol = 98: 2, flow rate: 0.4 ml/min,  $\lambda = 254$  nm, retention time:  $t$  (major) = 37.37 min,  $t$  (minor) = 41.77 min.

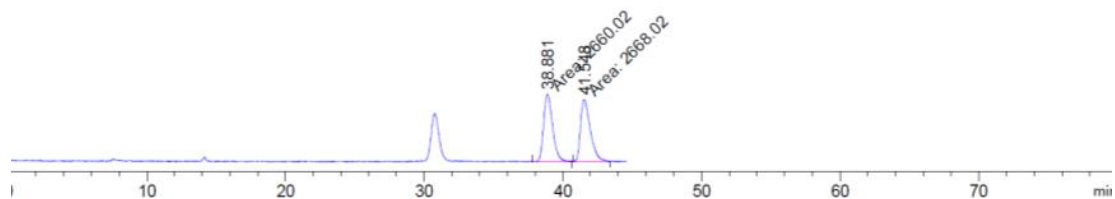

| Peak # | RetTime [min] | Type | Width [min] | Area [mAU*s] | Height [mAU] | Area %  |
|--------|---------------|------|-------------|--------------|--------------|---------|
| 1      | 38.881        | MM   | 0.7483      | 2660.01538   | 59.24261     | 49.9249 |
| 2      | 41.548        | MM   | 0.8158      | 2668.01904   | 54.51048     | 50.0751 |

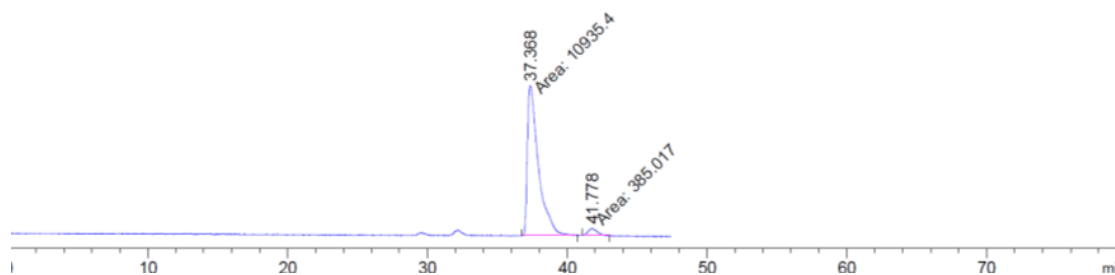

| Peak # | RetTime [min] | Type | Width [min] | Area [mAU*s] | Height [mAU] | Area %  |
|--------|---------------|------|-------------|--------------|--------------|---------|
| 1      | 37.368        | MM   | 0.9153      | 1.09354e4    | 199.12209    | 96.5989 |
| 2      | 41.778        | MM   | 0.7202      | 385.01730    | 8.91000      | 3.4011  |

Chiral HPLC chromatographic analysis of C2-alkylated pyrrole of **9b**

Condition: chiral OD-3 column, *n*-hexane/2-propanol = 98: 2, flow rate: 1 ml/min,  $\lambda = 280$  nm, retention time: *t* (major) = 21.64 min.

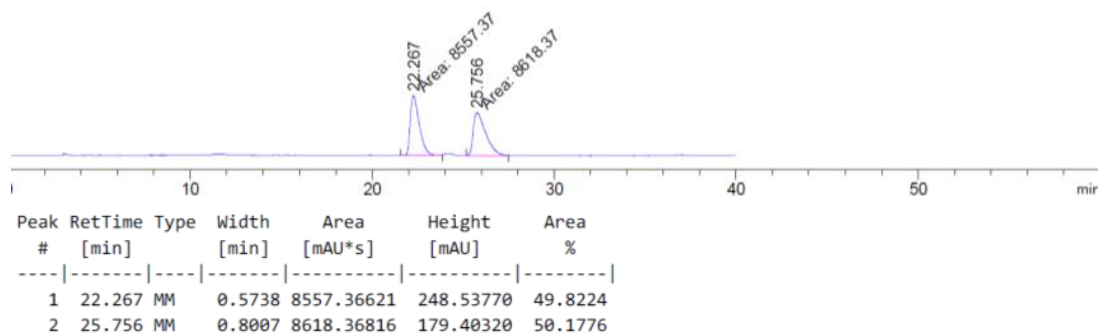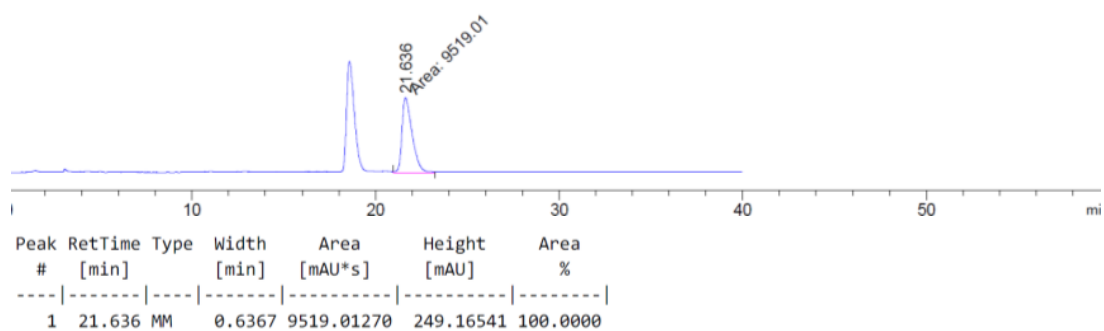



### Chiral HPLC chromatographic analysis of C3-alkylated pyrrole of **9c**

Condition: chiral OD-3 column, *n*-hexane/2-propanol = 85: 15, flow rate: 1 ml/min,  $\lambda = 280$  nm, retention time: *t* (major) = 23.35 min, *t* (minor) = 31.27 min.

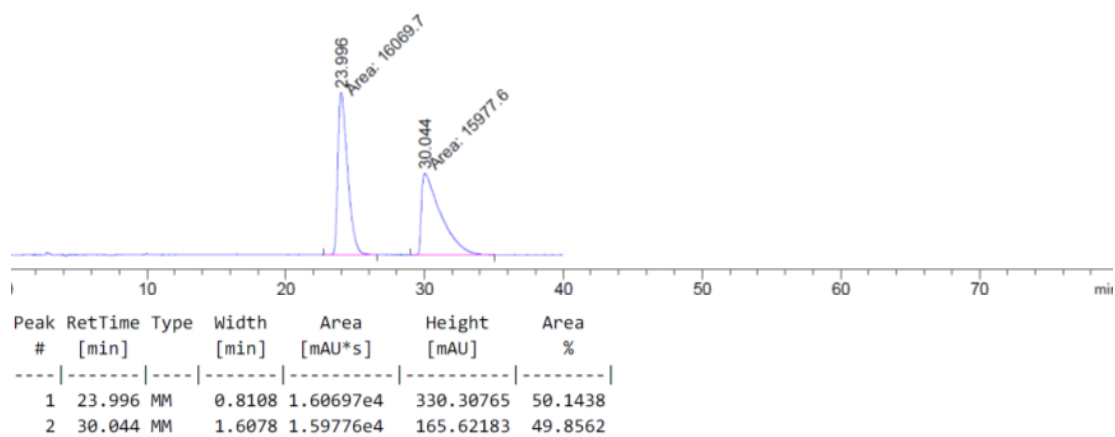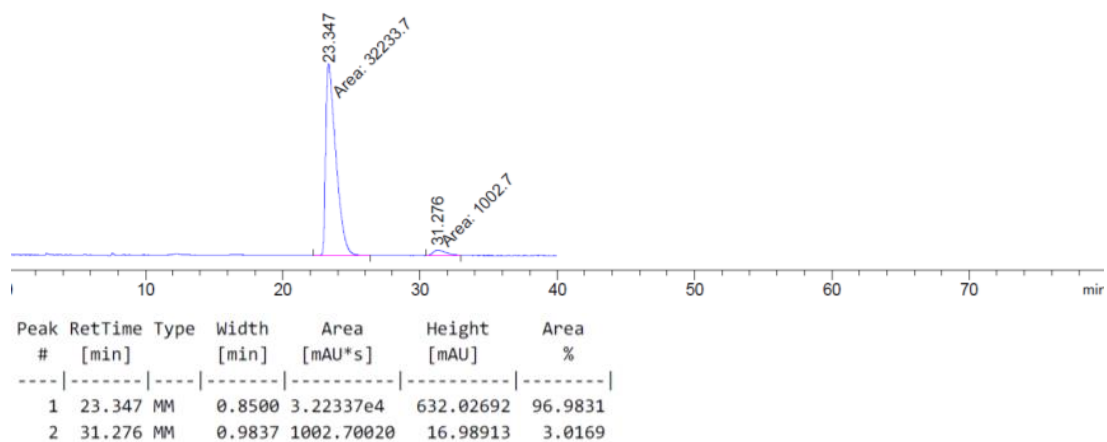

Chiral HPLC chromatographic analysis of C3-alkylated pyrrole of **9d**

Condition: chiral OD-H column, *n*-hexane/2-propanol = 95: 5, flow rate: 1 ml/min,  $\lambda = 280$  nm, retention time: t (major) = 29.68 min, t (minor) = 26.76 min.

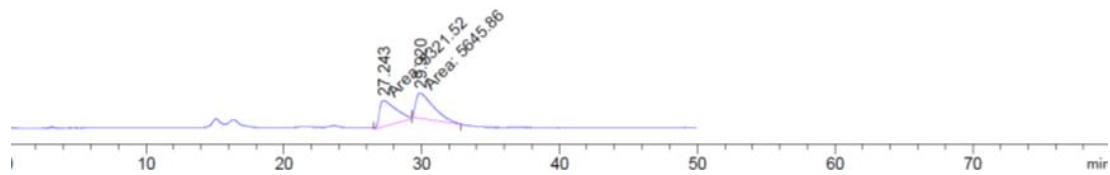

| Peak # | RetTime [min] | Type | Width [min] | Area [mAU*s] | Height [mAU] | Area %  |
|--------|---------------|------|-------------|--------------|--------------|---------|
| 1      | 27.243        | MM   | 0.9644      | 5321.52100   | 65.34373     | 48.5213 |
| 2      | 29.920        | MM   | 1.4900      | 5645.86279   | 63.15380     | 51.4787 |

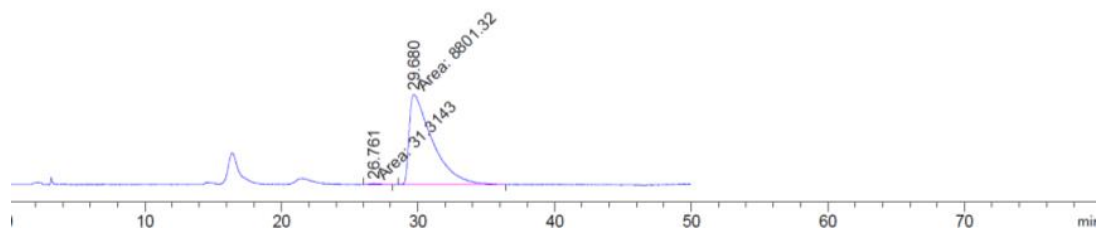

| Peak # | RetTime [min] | Type | Width [min] | Area [mAU*s] | Height [mAU] | Area %  |
|--------|---------------|------|-------------|--------------|--------------|---------|
| 1      | 26.761        | MM   | 0.6423      | 31.31428     | 8.12562e-1   | 0.3545  |
| 2      | 29.680        | MM   | 1.9445      | 8801.31543   | 75.43927     | 99.6455 |

Chiral HPLC chromatographic analysis of C3-alkylated pyrrole of **9e**

Condition: chiral AD-3 column, *n*-hexane/2-propanol = 95: 5, flow rate: 1 ml/min,  $\lambda = 280$  nm, retention time: *t* (major) = 17.89 min, *t* (minor) = 20.15 min.

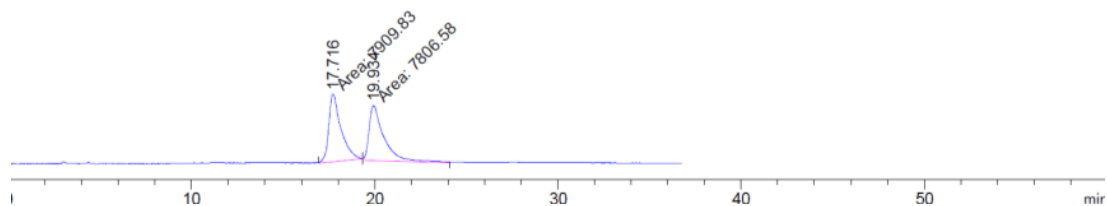

| Peak # | RetTime [min] | Type | Width [min] | Area [mAU*s] | Height [mAU] | Area %  |
|--------|---------------|------|-------------|--------------|--------------|---------|
| 1      | 17.716        | MM   | 0.7764      | 7909.83301   | 169.78731    | 50.3285 |
| 2      | 19.934        | MM   | 0.9481      | 7806.57764   | 137.23320    | 49.6715 |

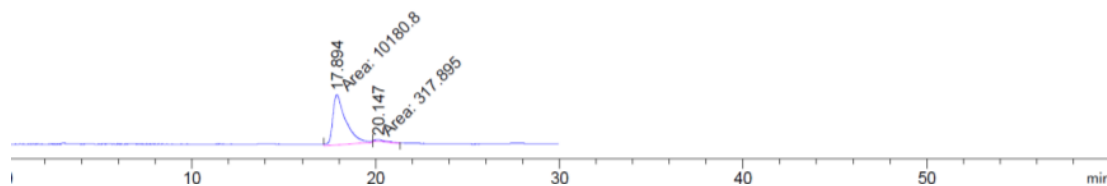

| Peak # | RetTime [min] | Type | Width [min] | Area [mAU*s] | Height [mAU] | Area %  |
|--------|---------------|------|-------------|--------------|--------------|---------|
| 1      | 17.894        | MM   | 0.8260      | 1.01808e4    | 205.42078    | 96.9721 |
| 2      | 20.147        | MM   | 0.7391      | 317.89493    | 7.16841      | 3.0279  |

Chiral HPLC chromatographic analysis of C3-alkylated pyrrole of **9f**

Condition: chiral AD-3 column, *n*-hexane/2-propanol = 85: 15, flow rate: 1 ml/min,  $\lambda = 280$  nm, retention time: *t* (major) = 32.78 min, *t* (minor) = 23.73 min.

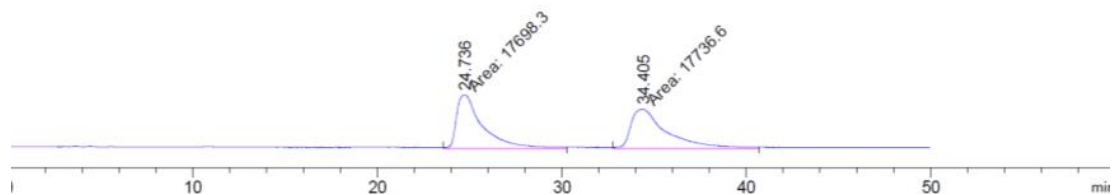

| Peak # | RetTime [min] | Type | Width [min] | Area [mAU*s] | Height [mAU] | Area %  |
|--------|---------------|------|-------------|--------------|--------------|---------|
| 1      | 24.736        | MM   | 1.6434      | 1.76983e4    | 179.48587    | 49.9460 |
| 2      | 34.405        | MM   | 2.2601      | 1.77366e4    | 130.79332    | 50.0540 |

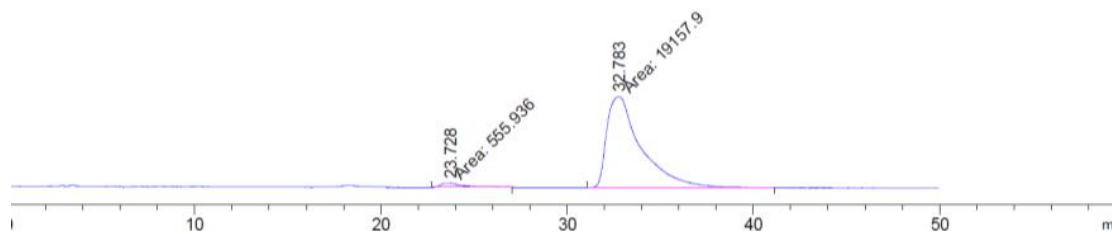

| Peak # | RetTime [min] | Type | Width [min] | Area [mAU*s] | Height [mAU] | Area %  |
|--------|---------------|------|-------------|--------------|--------------|---------|
| 1      | 23.728        | MM   | 1.4107      | 555.93640    | 6.56791      | 2.8200  |
| 2      | 32.783        | MM   | 2.1332      | 1.91579e4    | 149.68059    | 97.1800 |

Chiral HPLC chromatographic analysis of *para*-alkylated pyrrole of **11a**

Condition: chiral AD-3 column, *n*-hexane/2-propanol = 90: 10, flow rate: 1 ml/min,  $\lambda = 254$  nm, retention time:  $t$  (major) = 13.24 min,  $t$  (minor) = 15.72 min.

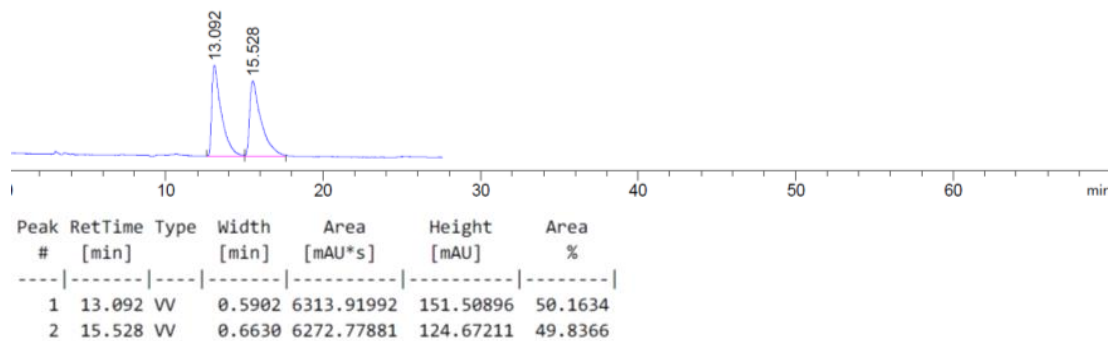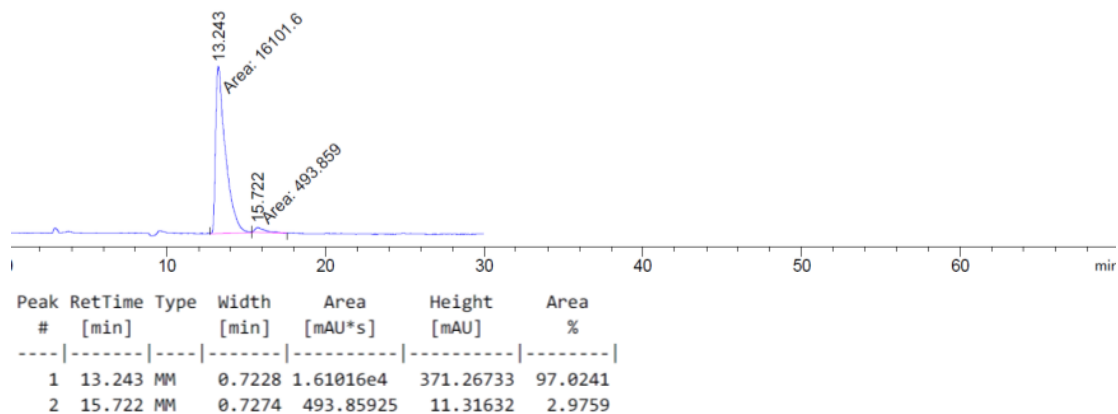

Chiral HPLC chromatographic analysis of *para*-alkylated pyrrole of **11b**

Condition: chiral AD-3 column, *n*-hexane/2-propanol = 85: 15, flow rate: 1 ml/min,  $\lambda = 280$  nm, retention time: t (major) = 44.12 min, t (minor) = 33.91 min.

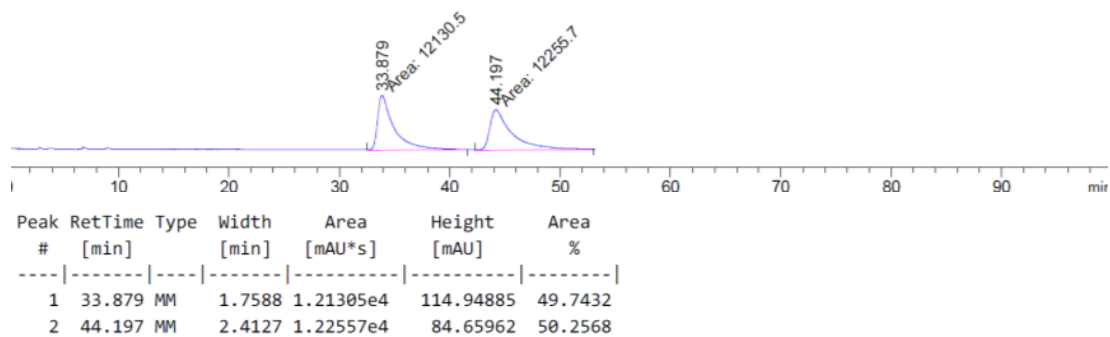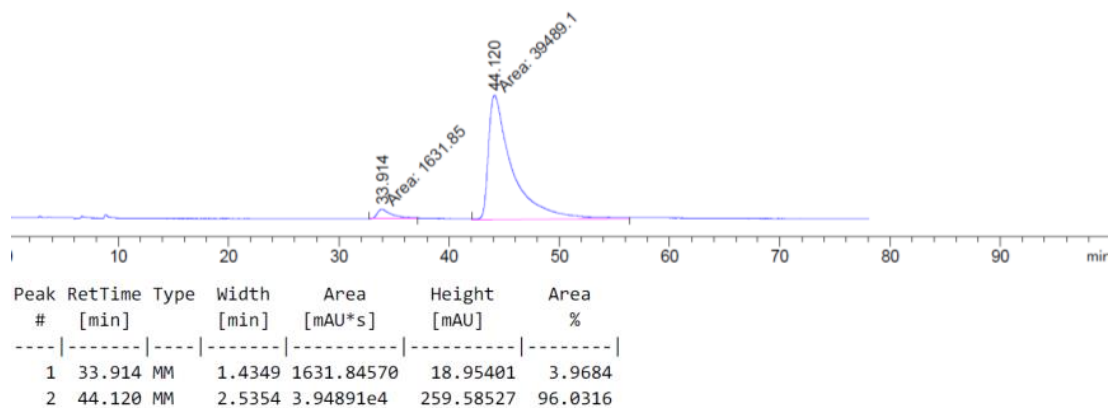

Chiral HPLC chromatographic analysis of *para*-alkylated pyrrole of **11c**

Condition: chiral AD-3 column, *n*-hexane/2-propanol = 75: 25, flow rate: 1 ml/min,  $\lambda = 280$  nm, retention time: t (major) = 29.08 min, t (minor) = 18.54 min.

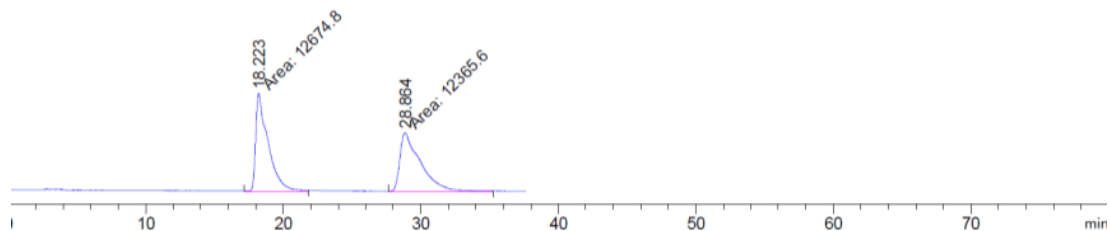

| Peak # | RetTime [min] | Type | Width [min] | Area [mAU*s] | Height [mAU] | Area %  |
|--------|---------------|------|-------------|--------------|--------------|---------|
| 1      | 18.223        | MM   | 1.0497      | 1.26748e4    | 201.23907    | 50.6173 |
| 2      | 28.864        | MM   | 1.7105      | 1.23656e4    | 120.48938    | 49.3827 |

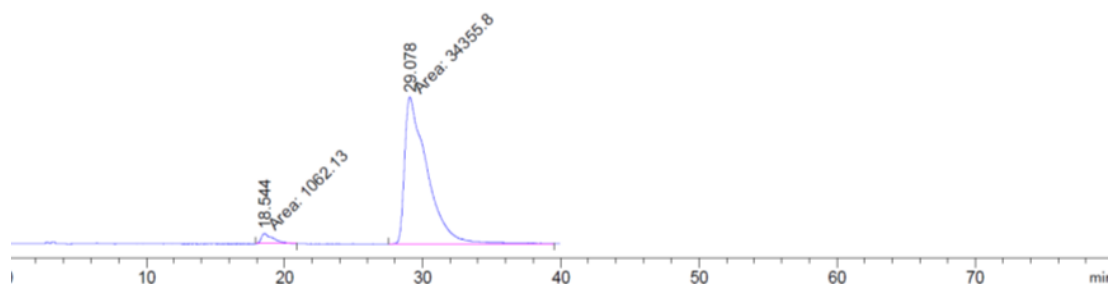

| Peak # | RetTime [min] | Type | Width [min] | Area [mAU*s] | Height [mAU] | Area %  |
|--------|---------------|------|-------------|--------------|--------------|---------|
| 1      | 18.544        | MM   | 0.9064      | 1062.13232   | 19.53116     | 2.9989  |
| 2      | 29.078        | MM   | 1.9010      | 3.43558e4    | 301.21399    | 97.0011 |

Chiral HPLC chromatographic analysis of *para*-alkylated pyrrole of **11d**

Condition: chiral AD-3 column, *n*-hexane/2-propanol = 80: 20, flow rate: 1 ml/min,  $\lambda = 280$  nm, retention time: t (major) = 20.58 min, t (minor) = 12.79 min.

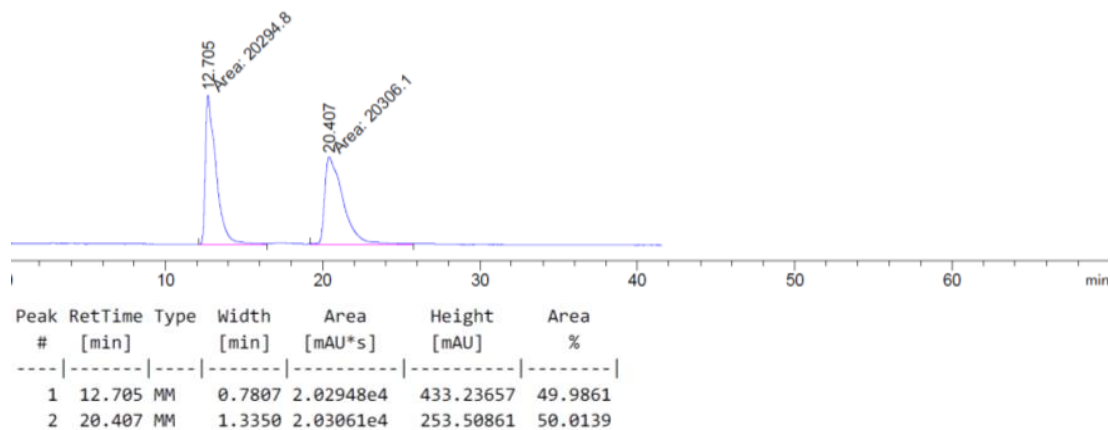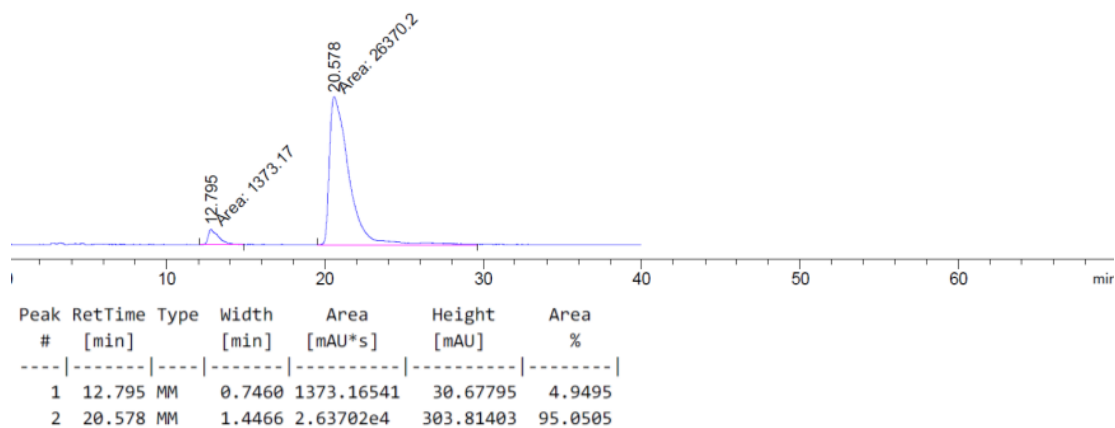



Chiral HPLC chromatographic analysis of *para*-alkylated pyrrole of **11e**

Condition: chiral AD-3 column, *n*-hexane/2-propanol = 80: 20, flow rate: 1 ml/min,  $\lambda = 280$  nm, retention time:  $t$  (major) = 25.33 min,  $t$  (minor) = 16.39 min.

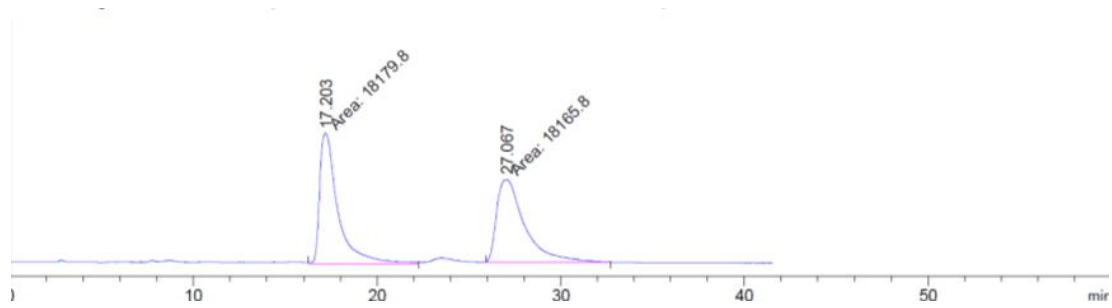

| Peak # | RetTime [min] | Type | Width [min] | Area [mAU*s] | Height [mAU] | Area %  |
|--------|---------------|------|-------------|--------------|--------------|---------|
| 1      | 17.203        | MM   | 1.1364      | 1.81798e4    | 266.63797    | 50.0192 |
| 2      | 27.067        | MM   | 1.7765      | 1.81658e4    | 170.42595    | 49.9808 |

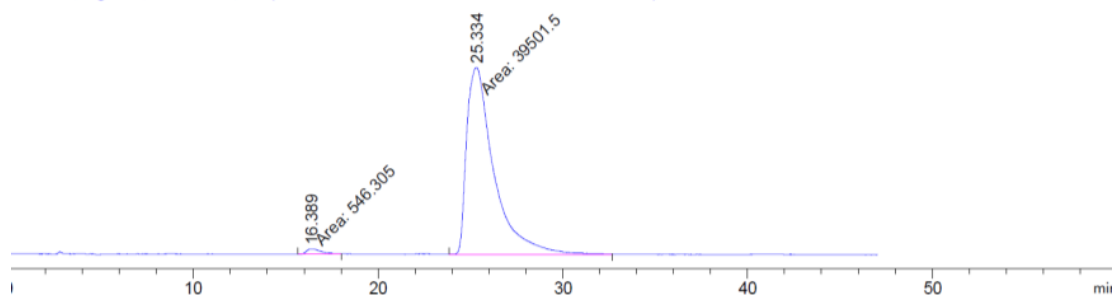

| Peak # | RetTime [min] | Type | Width [min] | Area [mAU*s] | Height [mAU] | Area %  |
|--------|---------------|------|-------------|--------------|--------------|---------|
| 1      | 16.389        | MM   | 0.8801      | 546.30536    | 10.34603     | 1.3641  |
| 2      | 25.334        | MM   | 1.7210      | 3.95015e4    | 382.55389    | 98.6359 |

Chiral HPLC chromatographic analysis of *para*-alkylated pyrrole of **11f**

Condition: chiral AD-3 column, *n*-hexane/2-propanol = 90: 10, flow rate: 1 ml/min,  $\lambda = 280$  nm, retention time:  $t$  (major) = 18.91 min,  $t$  (minor) = 25.99 min.

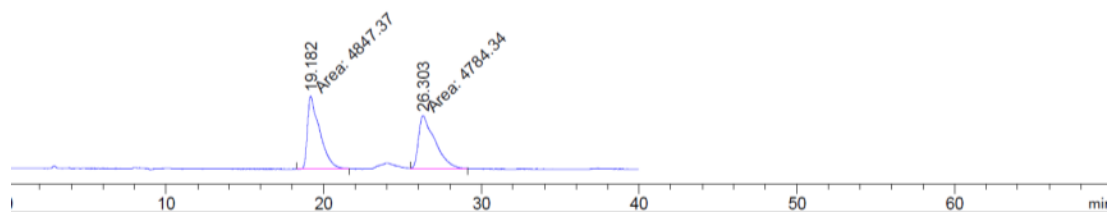

| Peak # | RetTime [min] | Type | Width [min] | Area [mAU*s] | Height [mAU] | Area %  |
|--------|---------------|------|-------------|--------------|--------------|---------|
| 1      | 19.182        | MM   | 0.8994      | 4847.36719   | 89.82850     | 50.3272 |
| 2      | 26.303        | MM   | 1.2114      | 4784.33594   | 65.82258     | 49.6728 |

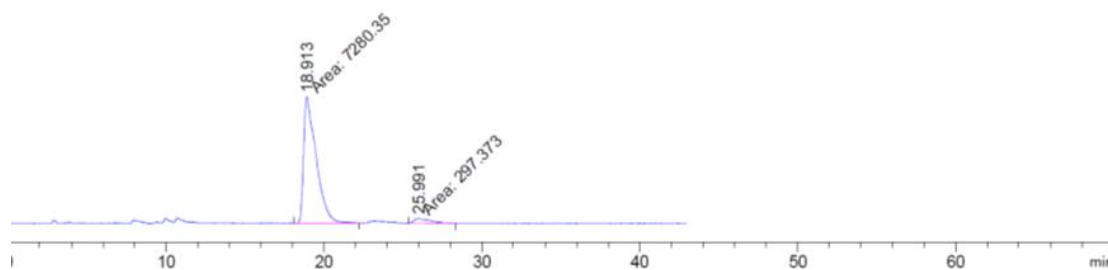

| Peak # | RetTime [min] | Type | Width [min] | Area [mAU*s] | Height [mAU] | Area %  |
|--------|---------------|------|-------------|--------------|--------------|---------|
| 1      | 18.913        | MM   | 0.9189      | 7280.35352   | 132.04611    | 96.0757 |
| 2      | 25.991        | MM   | 1.0553      | 297.37329    | 4.69628      | 3.9243  |

Chiral HPLC chromatographic analysis of *para*-alkylated pyrrole of **11g**

Condition: chiral AD-3 column, *n*-hexane/2-propanol = 75: 25, flow rate: 1 ml/min,  $\lambda = 280$  nm, retention time:  $t$  (major) = 39.67 min,  $t$  (minor) = 28.78 min.

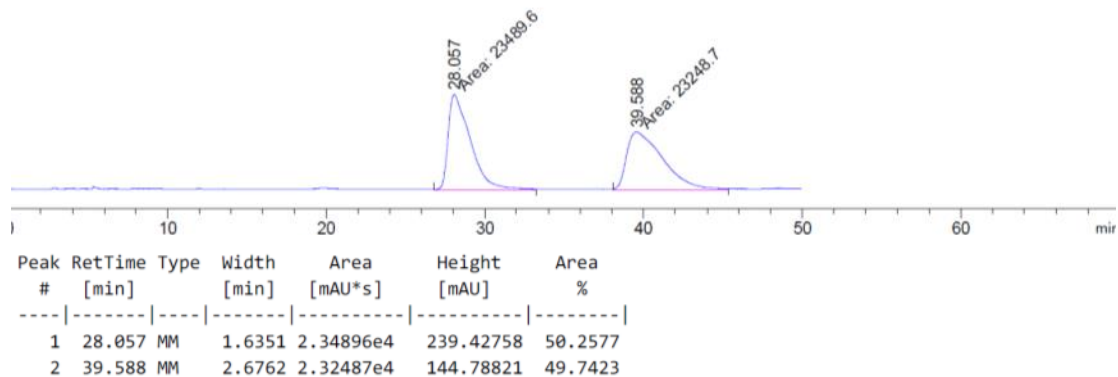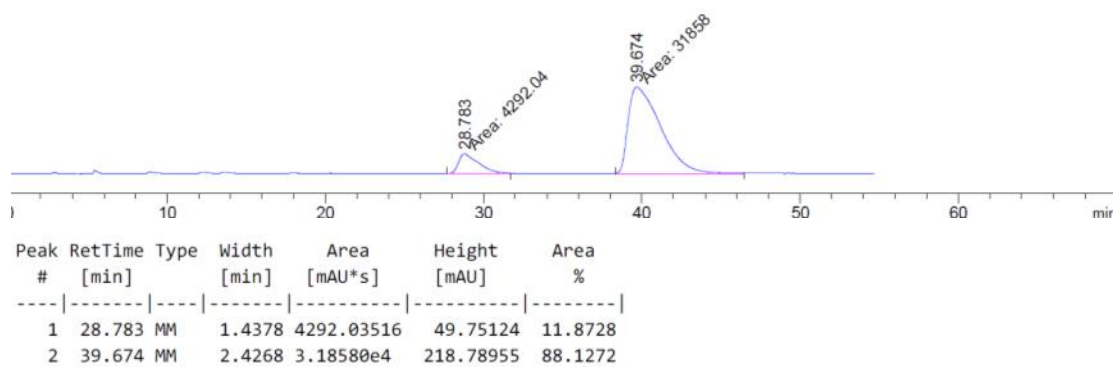

Chiral HPLC chromatographic analysis of *para*-alkylated pyrrole of **11h**

Condition: chiral AD-3 column, *n*-hexane/2-propanol = 90: 10, flow rate: 1 ml/min,  $\lambda = 254$  nm, retention time: t (major) = 16.91 min, t (minor) = 24.65 min.

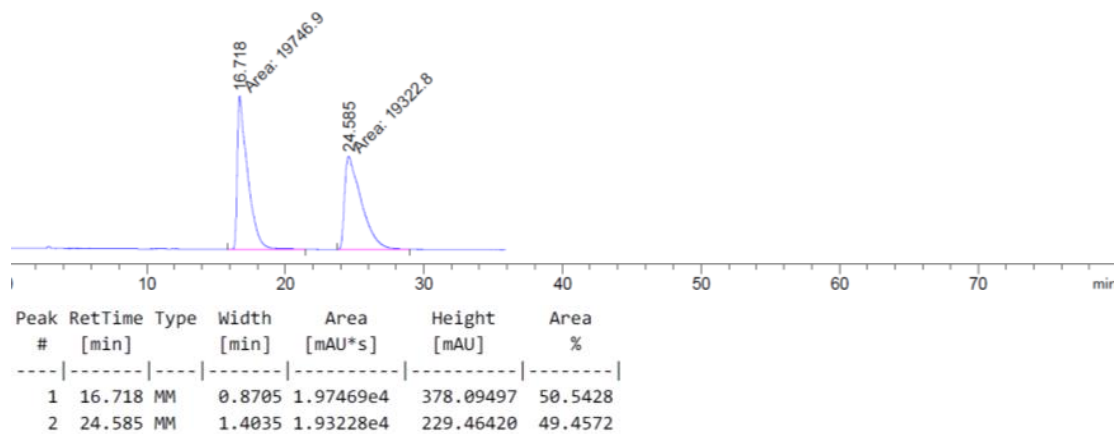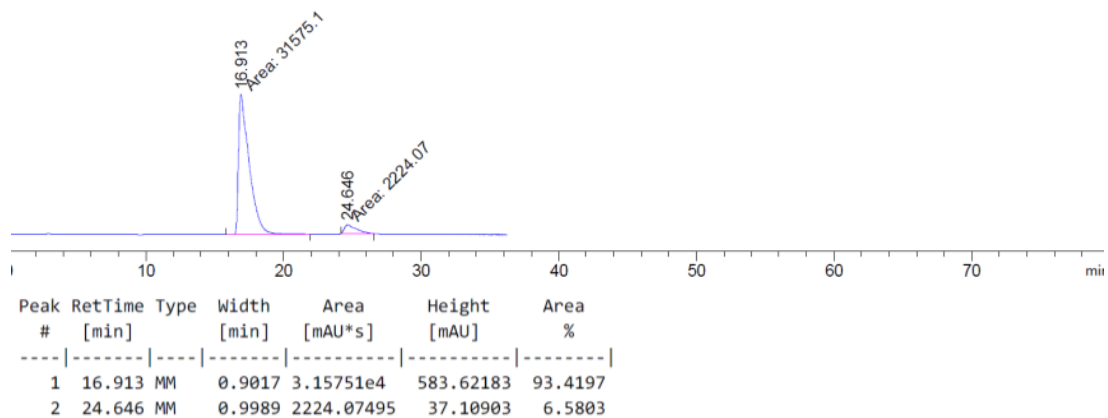

### Chiral HPLC chromatographic analysis of indole derivative of **13**

Condition: chiral OD-3 column, *n*-hexane/2-propanol = 90: 10, flow rate: 0.5 ml/min,  $\lambda = 280$  nm, retention time: *t* (major) = 25.38 min, *t* (minor) = 23.44 min.

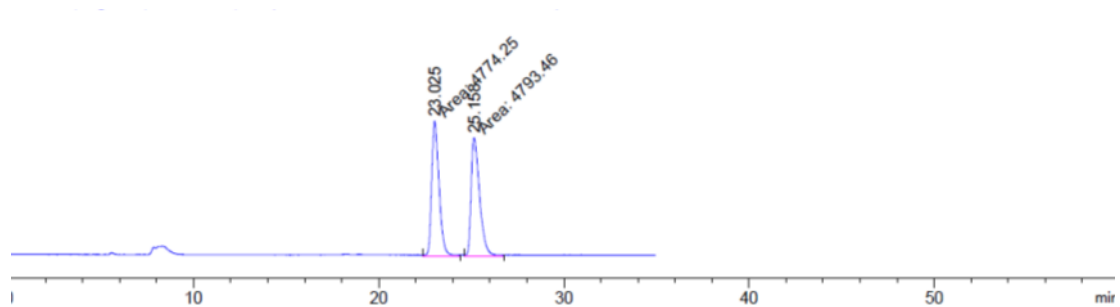

| Peak # | RetTime [min] | Type | Width [min] | Area [mAU*s] | Height [mAU] | Area %  |
|--------|---------------|------|-------------|--------------|--------------|---------|
| 1      | 23.025        | MM   | 0.4633      | 4774.25391   | 171.75862    | 49.8996 |
| 2      | 25.158        | MM   | 0.5309      | 4793.46240   | 150.49553    | 50.1004 |

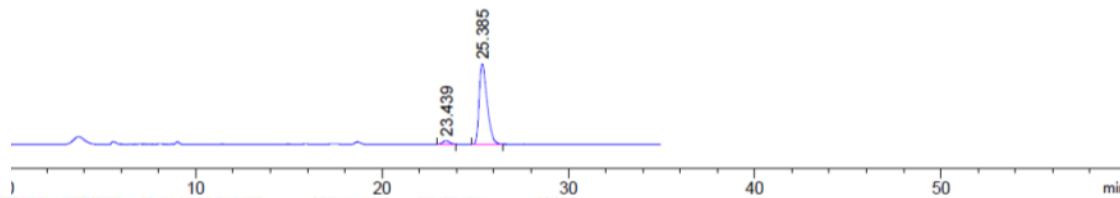

| Peak # | RetTime [min] | Type | Width [min] | Area [mAU*s] | Height [mAU] | Area %  |
|--------|---------------|------|-------------|--------------|--------------|---------|
| 1      | 23.439        | BB   | 0.3090      | 110.49870    | 4.39946      | 3.5222  |
| 2      | 25.385        | BB   | 0.4399      | 3026.73877   | 102.07632    | 96.4778 |

### Chiral HPLC chromatographic analysis of indole derivative of **14**

Condition: chiral AD-3 column, *n*-hexane/2-propanol = 95: 5, flow rate: 0.8 ml/min,  $\lambda = 280$  nm, retention time: *t* (major) = 28.42 min, *t* (minor) = 21.76 min.

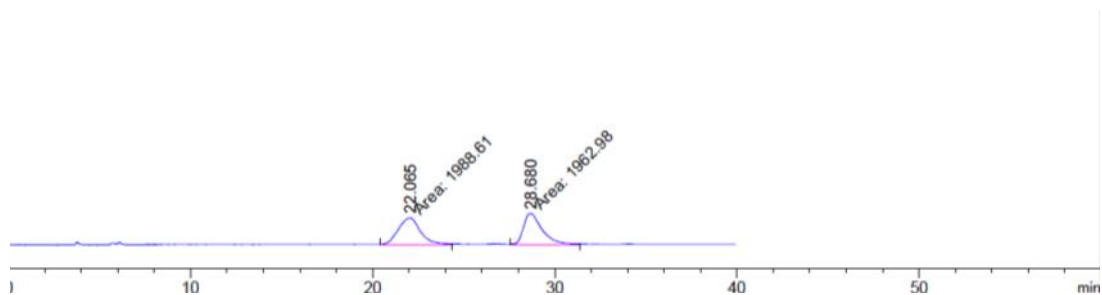

| Peak # | RetTime [min] | Type | Width [min] | Area [mAU*s] | Height [mAU] | Area %  |
|--------|---------------|------|-------------|--------------|--------------|---------|
| 1      | 22.065        | MM   | 1.4245      | 1988.61304   | 23.26722     | 50.3244 |
| 2      | 28.680        | MM   | 1.2041      | 1962.97656   | 27.17184     | 49.6756 |

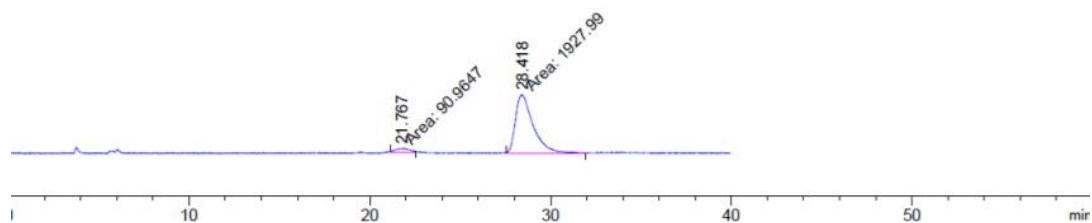

| Peak # | RetTime [min] | Type | Width [min] | Area [mAU*s] | Height [mAU] | Area %  |
|--------|---------------|------|-------------|--------------|--------------|---------|
| 1      | 21.767        | MM   | 0.8709      | 90.96465     | 1.74083      | 4.5055  |
| 2      | 28.418        | MM   | 1.1501      | 1927.98657   | 27.93885     | 95.4945 |

Chiral HPLC chromatographic analysis of indole derivative of **15**

Condition: chiral OD-H column, *n*-hexane/2-propanol = 95: 5, flow rate: 0.5 ml/min,  $\lambda = 280$  nm, retention time: *t* (major) = 15.70 min, *t* (minor) = 23.35 min.

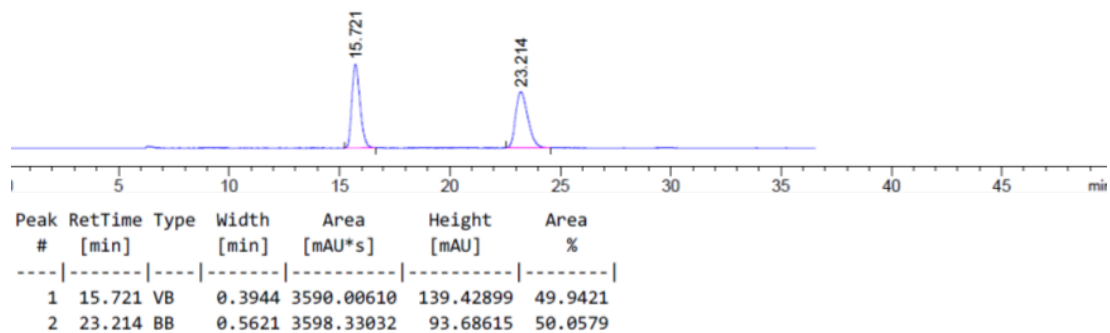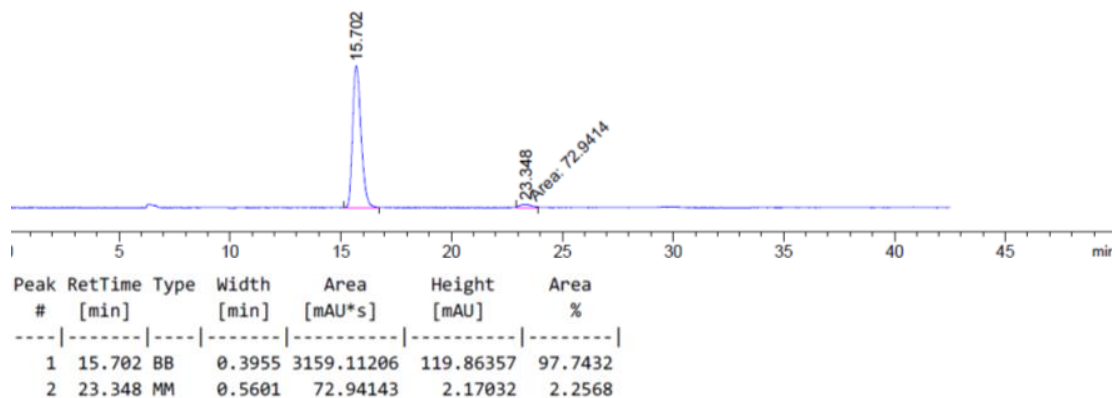

## Coordinates

| <b>1e</b> |          |          |          |
|-----------|----------|----------|----------|
| Fe        | 3.94414  | 1.2861   | 2.32742  |
| N         | 4.16879  | -0.69098 | 2.85118  |
| N         | 2.45441  | 0.48184  | 1.0325   |
| N         | 4.9858   | 1.81648  | 0.5248   |
| N         | 5.31251  | 2.57899  | 3.09187  |
| C         | 5.06269  | -1.25521 | 3.65726  |
| C         | 5.00017  | -2.60687 | 4.06896  |
| C         | 3.93141  | -3.3733  | 3.67329  |
| H         | 3.81999  | -4.40638 | 4.00178  |
| C         | 2.94048  | -2.80414 | 2.83572  |
| C         | 1.78049  | -3.5035  | 2.43505  |
| H         | 1.64124  | -4.52945 | 2.76948  |
| C         | 0.83164  | -2.88497 | 1.6546   |
| H         | -0.07378 | -3.41447 | 1.37048  |
| C         | 1.02794  | -1.56872 | 1.19759  |
| H         | 0.26688  | -1.11496 | 0.56725  |
| C         | 2.17142  | -0.86781 | 1.5289   |
| C         | 3.11594  | -1.45688 | 2.40193  |
| C         | 1.2354   | 1.33244  | 1.06047  |
| H         | 1.51832  | 2.37874  | 0.89952  |
| H         | 0.7426   | 1.23661  | 2.03152  |
| H         | 0.52266  | 1.05231  | 0.27428  |
| C         | 3.06054  | 0.52435  | -0.38754 |
| H         | 2.61602  | 1.43079  | -0.82274 |
| C         | 2.64995  | -0.65361 | -1.26383 |
| H         | 3.0728   | -1.58243 | -0.85288 |
| H         | 1.55997  | -0.76979 | -1.23761 |
| C         | 3.11708  | -0.46542 | -2.70245 |
| H         | 2.83662  | -1.34434 | -3.29233 |
| H         | 2.58901  | 0.3884   | -3.15218 |
| C         | 4.61589  | -0.22578 | -2.76049 |
| H         | 4.93804  | -0.03459 | -3.78954 |
| H         | 5.15507  | -1.12631 | -2.43036 |
| C         | 4.99751  | 0.95553  | -1.87844 |
| H         | 4.48192  | 1.85655  | -2.24345 |
| H         | 6.06753  | 1.1698   | -1.96037 |
| C         | 4.59327  | 0.71781  | -0.41733 |
| H         | 5.08647  | -0.18933 | -0.03065 |
| C         | 4.62231  | 3.17436  | 0.04421  |
| H         | 5.25947  | 3.48625  | -0.79141 |
| H         | 4.74585  | 3.88838  | 0.86275  |
| H         | 3.57773  | 3.19447  | -0.28029 |
| C         | 6.4677   | 2.36747  | 2.36157  |
| C         | 6.34258  | 1.84031  | 1.04623  |
| C         | 7.48286  | 1.45538  | 0.37098  |
| H         | 7.42026  | 1.02433  | -0.62297 |
| C         | 8.75486  | 1.63663  | 0.95288  |
| H         | 9.63523  | 1.32999  | 0.39435  |
| C         | 8.89379  | 2.23397  | 2.18447  |
| H         | 9.88076  | 2.41221  | 2.60606  |
| C         | 7.75019  | 2.61077  | 2.9259   |



|   |         |          |         |
|---|---------|----------|---------|
| C | 7.81386 | 3.18158  | 4.22377 |
| H | 8.78911 | 3.38247  | 4.66694 |
| C | 6.65058 | 3.44197  | 4.90904 |
| C | 5.41568 | 3.08992  | 4.31465 |
| C | 6.26197 | -0.57827 | 4.24446 |
| H | 6.04707 | 0.43678  | 4.60668 |
| H | 7.03873 | -0.47561 | 3.46812 |
| C | 6.69902 | -1.54261 | 5.36056 |
| H | 7.77815 | -1.5271  | 5.53216 |
| H | 6.21786 | -1.25015 | 6.30131 |
| C | 6.18335 | -2.92697 | 4.93028 |
| H | 6.93759 | -3.46504 | 4.33783 |
| H | 5.93807 | -3.57522 | 5.77775 |
| C | 4.28149 | 3.32784  | 5.25643 |
| H | 3.52546 | 2.52966  | 5.23245 |
| H | 3.76125 | 4.25632  | 4.97374 |
| C | 4.98785 | 3.47147  | 6.61503 |
| H | 5.06377 | 2.48666  | 7.09264 |
| H | 4.44587 | 4.12336  | 7.30397 |
| C | 6.39812 | 3.99082  | 6.28167 |
| H | 6.41707 | 5.08992  | 6.24963 |
| H | 7.15366 | 3.69017  | 7.01451 |

---

**4b**

|   |           |          |         |
|---|-----------|----------|---------|
| C | -5.86911  | 18.91224 | 4.64995 |
| C | -5.93356  | 17.3093  | 6.06297 |
| H | -5.62967  | 16.3953  | 6.56034 |
| C | -6.99699  | 18.12348 | 6.37369 |
| H | -7.79394  | 18.0501  | 7.10271 |
| N | -5.24676  | 17.7929  | 4.9942  |
| N | -6.95184  | 19.15692 | 5.47496 |
| C | -7.99633  | 20.17479 | 5.34718 |
| H | -7.87042  | 20.64164 | 4.36341 |
| C | -5.38992  | 19.80549 | 3.57004 |
| C | -5.53455  | 21.26614 | 3.77011 |
| H | -5.86345  | 21.63277 | 4.74503 |
| O | -4.84127  | 19.33772 | 2.5797  |
| C | -5.21036  | 22.13224 | 2.79885 |
| H | -4.87075  | 21.70048 | 1.85426 |
| C | -5.26471  | 23.60928 | 2.90493 |
| H | -5.60845  | 23.94355 | 3.89003 |
| H | -4.27692  | 24.05232 | 2.71908 |
| H | -5.93164  | 24.03746 | 2.14429 |
| H | -7.83386  | 20.96147 | 6.0979  |
| C | -9.38047  | 19.60165 | 5.48484 |
| C | -10.27786 | 20.13092 | 6.41175 |
| C | -9.7866   | 18.53572 | 4.67529 |
| C | -11.56552 | 19.61103 | 6.52728 |
| H | -9.96409  | 20.95744 | 7.05037 |
| C | -11.06895 | 18.01406 | 4.79195 |
| H | -9.08386  | 18.10891 | 3.95922 |
| C | -11.96249 | 18.55132 | 5.71829 |
| H | -12.25569 | 20.03175 | 7.25621 |
| H | -11.37353 | 17.18278 | 4.15877 |
| H | -12.96583 | 18.13972 | 5.81077 |

---

**3e**

---

|   |          |          |           |
|---|----------|----------|-----------|
| C | -3.27051 | 0.39994  | -11.18164 |
| C | -2.9799  | 0.61645  | -9.80745  |
| C | -1.74514 | 1.18683  | -9.4662   |
| C | -0.85303 | 1.51865  | -10.47419 |
| C | -1.16393 | 1.29321  | -11.82661 |
| C | -2.37676 | 0.73118  | -12.19985 |
| C | -5.02271 | -0.30518 | -9.98242  |
| H | -1.4921  | 1.36669  | -8.42196  |
| H | 0.10778  | 1.96162  | -10.21739 |
| H | -0.44122 | 1.56345  | -12.59452 |
| H | -2.61819 | 0.55484  | -13.24748 |
| H | -6.00753 | -0.7352  | -9.83979  |
| N | -4.52508 | -0.16354 | -11.26221 |
| C | -5.1889  | -0.53859 | -12.48178 |
| H | -5.32115 | 0.32788  | -13.14247 |
| H | -4.61916 | -1.30398 | -13.0248  |
| H | -6.17481 | -0.94561 | -12.24354 |
| C | -4.11388 | 0.15781  | -9.06952  |
| H | -4.24327 | 0.1687   | -7.99432  |

---

**IntA<sub>1</sub>**

---

|   |          |          |          |
|---|----------|----------|----------|
| N | 4.09796  | -0.32223 | 2.89455  |
| N | 2.36988  | 0.50749  | 0.83706  |
| N | 5.05227  | 1.52775  | 0.44648  |
| N | 5.48935  | 2.87781  | 2.72923  |
| C | 4.95613  | -0.76588 | 3.8036   |
| C | 4.90206  | -2.05534 | 4.39419  |
| C | 3.85651  | -2.88094 | 4.07873  |
| H | 3.74157  | -3.86159 | 4.54064  |
| C | 2.88508  | -2.43823 | 3.14828  |
| C | 1.74583  | -3.21244 | 2.83903  |
| H | 1.62442  | -4.18266 | 3.31701  |
| C | 0.80195  | -2.73498 | 1.96186  |
| H | -0.08667 | -3.31849 | 1.73519  |
| C | 0.99766  | -1.49935 | 1.32278  |
| H | 0.25348  | -1.16149 | 0.60633  |
| C | 2.12249  | -0.73051 | 1.56109  |
| C | 3.06525  | -1.16043 | 2.53148  |
| C | 1.10988  | 1.22275  | 0.5488   |
| H | 1.34577  | 2.24158  | 0.22726  |
| H | 0.49715  | 1.26334  | 1.45409  |
| H | 0.52431  | 0.74068  | -0.24634 |
| C | 3.09623  | 0.29712  | -0.48102 |
| H | 2.78783  | 1.16347  | -1.08645 |
| C | 2.66789  | -0.96662 | -1.22653 |
| H | 2.96643  | -1.84826 | -0.64018 |
| H | 1.57259  | -1.0018  | -1.29617 |
| C | 3.28862  | -1.04865 | -2.61482 |
| H | 2.98781  | -1.98549 | -3.09656 |
| H | 2.89614  | -0.237   | -3.24585 |
| C | 4.8029   | -0.93778 | -2.53283 |
| H | 5.24835  | -0.93947 | -3.5337  |
| H | 5.21588  | -1.81298 | -2.00792 |

---

|    |         |          |          |          |
|----|---------|----------|----------|----------|
| C  |         | 5.19074  | 0.33692  | -1.79665 |
| H  |         | 4.77675  | 1.19512  | -2.34718 |
| H  |         | 6.27631  | 0.48118  | -1.79677 |
| C  |         | 4.62452  | 0.35329  | -0.36828 |
| H  |         | 4.97506  | -0.52985 | 0.18893  |
| C  |         | 4.93472  | 2.8108   | -0.28852 |
| H  |         | 5.64208  | 2.87108  | -1.12426 |
| H  |         | 5.14133  | 3.62982  | 0.40454  |
| H  |         | 3.91404  | 2.92425  | -0.67099 |
| C  |         | 6.58875  | 2.28498  | 2.16177  |
| C  |         | 6.36692  | 1.4341   | 1.04427  |
| C  |         | 7.39411  | 0.61464  | 0.62047  |
| H  |         | 7.24413  | -0.10085 | -0.18191 |
| C  |         | 8.67303  | 0.70371  | 1.21138  |
| H  |         | 9.46428  | 0.05439  | 0.84503  |
| C  |         | 8.93799  | 1.62478  | 2.19735  |
| H  |         | 9.93864  | 1.72344  | 2.61331  |
| C  |         | 7.89467  | 2.43148  | 2.70798  |
| C  |         | 8.06337  | 3.33021  | 3.79161  |
| H  |         | 9.05678  | 3.47184  | 4.21724  |
| C  |         | 6.96483  | 3.97591  | 4.30189  |
| C  |         | 5.68725  | 3.68404  | 3.76037  |
| C  |         | 6.11607  | -0.00046 | 4.36228  |
| H  |         | 5.87607  | 1.0501   | 4.56682  |
| H  |         | 6.93727  | -0.0019  | 3.62765  |
| C  |         | 6.49909  | -0.79292 | 5.62099  |
| H  |         | 7.56273  | -0.71559 | 5.8622   |
| H  |         | 5.94244  | -0.40253 | 6.48179  |
| C  |         | 6.05273  | -2.23529 | 5.33614  |
| H  |         | 6.85363  | -2.80435 | 4.84101  |
| H  |         | 5.79103  | -2.79456 | 6.24048  |
| C  |         | 4.61482  | 4.38852  | 4.53519  |
| H  |         | 3.74215  | 3.74794  | 4.71718  |
| H  |         | 4.25516  | 5.25418  | 3.955    |
| C  |         | 5.33741  | 4.82625  | 5.81926  |
| H  |         | 5.22547  | 4.04648  | 6.58265  |
| H  |         | 4.93233  | 5.74979  | 6.24247  |
| C  |         | 6.82168  | 4.95051  | 5.43094  |
| H  |         | 7.05299  | 5.96594  | 5.07645  |
| H  |         | 7.50258  | 4.75397  | 6.26564  |
| Fe | 3.68335 |          | 1.72744  | 2.21994  |
| C  |         | 1.62917  | 3.78024  | 2.93387  |
| C  |         | 2.69371  | 4.88257  | 1.41388  |
| H  |         | 3.3968   | 5.08565  | 0.61611  |
| C  |         | 1.77703  | 5.74965  | 1.97582  |
| H  |         | 1.56202  | 6.79273  | 1.78601  |
| N  |         | 2.60732  | 3.67264  | 2.01559  |
| N  |         | 1.11111  | 5.05066  | 2.93453  |
| C  |         | 0.09755  | 5.63398  | 3.85403  |
| H  |         | 0.28979  | 5.19502  | 4.83953  |
| C  |         | 1.31653  | 2.612    | 3.73929  |
| C  |         | 0.10293  | 2.48191  | 4.51109  |
| H  |         | -0.63597 | 3.2785   | 4.4696   |
| O  |         | 2.15797  | 1.66989  | 3.67373  |
| C  |         | -0.15495 | 1.36821  | 5.23554  |
| H  |         | 0.60582  | 0.5838   | 5.23506  |
| C  |         | -1.3783  | 1.1293   | 6.02087  |

|   |          |          |         |
|---|----------|----------|---------|
| H | -2.09082 | 1.95732  | 5.96767 |
| H | -1.87898 | 0.2115   | 5.68374 |
| H | -1.12864 | 0.94725  | 7.0751  |
| H | -0.89039 | 5.29748  | 3.51664 |
| C | 0.16983  | 7.12814  | 3.90695 |
| C | -0.78177 | 7.90701  | 3.24608 |
| C | 1.2039   | 7.7529   | 4.61315 |
| C | -0.70571 | 9.29678  | 3.29563 |
| H | -1.59279 | 7.42434  | 2.70065 |
| C | 1.28194  | 9.13956  | 4.65817 |
| H | 1.94485  | 7.14498  | 5.13643 |
| C | 0.32584  | 9.91221  | 3.99939 |
| H | -1.4562  | 9.89793  | 2.78783 |
| H | 2.08153  | 9.62198  | 5.21563 |
| H | 0.38252  | 10.99734 | 4.0417  |

### TSA<sub>2s</sub>

|   |         |          |          |
|---|---------|----------|----------|
| N | 4.25931 | -0.32763 | 2.69716  |
| N | 2.43197 | 0.52553  | 0.74742  |
| N | 5.08372 | 1.62451  | 0.33523  |
| N | 5.52293 | 2.92556  | 2.64134  |
| C | 5.15883 | -0.78473 | 3.55488  |
| C | 5.18444 | -2.11035 | 4.06705  |
| C | 4.1737  | -2.96734 | 3.72659  |
| H | 4.12415 | -3.98345 | 4.12033  |
| C | 3.13812 | -2.50495 | 2.87837  |
| C | 1.99813 | -3.2901  | 2.60207  |
| H | 1.92928 | -4.28724 | 3.03383  |
| C | 0.98789 | -2.78842 | 1.81798  |
| H | 0.0977  | -3.37995 | 1.61878  |
| C | 1.11934 | -1.51991 | 1.22769  |
| H | 0.32966 | -1.16849 | 0.56872  |
| C | 2.24047 | -0.73689 | 1.43395  |
| C | 3.24573 | -1.18614 | 2.33201  |
| C | 1.14891 | 1.21323  | 0.50299  |
| H | 1.35472 | 2.24241  | 0.19521  |
| H | 0.56137 | 1.2286   | 1.42638  |
| H | 0.55385 | 0.73101  | -0.2859  |
| C | 3.14044 | 0.37223  | -0.58583 |
| H | 2.79968 | 1.24652  | -1.16146 |
| C | 2.7286  | -0.88065 | -1.35829 |
| H | 3.06512 | -1.77095 | -0.80642 |
| H | 1.63305 | -0.94467 | -1.40273 |
| C | 3.31914 | -0.90585 | -2.76169 |
| H | 3.03146 | -1.83469 | -3.26694 |
| H | 2.89336 | -0.08491 | -3.35833 |
| C | 4.83197 | -0.75918 | -2.70791 |
| H | 5.25582 | -0.72106 | -3.7176  |
| H | 5.27626 | -1.63944 | -2.21783 |
| C | 5.20599 | 0.50141  | -1.94124 |
| H | 4.76355 | 1.36654  | -2.45812 |
| H | 6.28829 | 0.66939  | -1.95731 |
| C | 4.6696  | 0.46485  | -0.50153 |
| H | 5.05365 | -0.42548 | 0.02107  |
| C | 4.91244 | 2.92424  | -0.35774 |
| H | 5.60419 | 3.03457  | -1.20196 |

|    |          |          |          |
|----|----------|----------|----------|
| H  | 5.09686  | 3.73038  | 0.35621  |
| H  | 3.88202  | 3.01308  | -0.71843 |
| C  | 6.62693  | 2.37696  | 2.04333  |
| C  | 6.40697  | 1.54916  | 0.90711  |
| C  | 7.44825  | 0.76581  | 0.44986  |
| H  | 7.30399  | 0.06761  | -0.369   |
| C  | 8.7328   | 0.87194  | 1.02583  |
| H  | 9.53463  | 0.25185  | 0.63226  |
| C  | 8.99095  | 1.77527  | 2.03022  |
| H  | 9.99539  | 1.88807  | 2.4336   |
| C  | 7.93646  | 2.54417  | 2.57509  |
| C  | 8.09711  | 3.42132  | 3.67794  |
| H  | 9.09236  | 3.57756  | 4.09428  |
| C  | 6.98929  | 4.02771  | 4.21623  |
| C  | 5.71274  | 3.71442  | 3.68517  |
| C  | 6.28159  | 0.00674  | 4.15186  |
| H  | 5.98793  | 1.03366  | 4.40104  |
| H  | 7.10721  | 0.07867  | 3.42591  |
| C  | 6.69464  | -0.82828 | 5.37233  |
| H  | 7.74578  | -0.69563 | 5.64342  |
| H  | 6.09372  | -0.52721 | 6.2407   |
| C  | 6.3483   | -2.27722 | 4.99525  |
| H  | 7.18633  | -2.75824 | 4.46914  |
| H  | 6.12376  | -2.90839 | 5.86272  |
| C  | 4.62943  | 4.37064  | 4.4855   |
| H  | 3.77725  | 3.69891  | 4.65617  |
| H  | 4.23698  | 5.23665  | 3.92774  |
| C  | 5.35621  | 4.79976  | 5.77019  |
| H  | 5.2768   | 3.99976  | 6.51731  |
| H  | 4.93259  | 5.70274  | 6.21974  |
| C  | 6.83267  | 4.97346  | 5.36818  |
| H  | 7.03035  | 6.00263  | 5.0334   |
| H  | 7.52883  | 4.77894  | 6.19097  |
| Fe | 3.70963  | 1.79534  | 2.13634  |
| C  | 1.58777  | 3.73152  | 2.87277  |
| C  | 2.5816   | 4.95016  | 1.38879  |
| H  | 3.27117  | 5.21347  | 0.59647  |
| C  | 1.62855  | 5.74367  | 1.97957  |
| H  | 1.35476  | 6.77963  | 1.83328  |
| N  | 2.56002  | 3.7095   | 1.95122  |
| N  | 1.00564  | 4.96619  | 2.92072  |
| C  | -0.03496 | 5.43812  | 3.85718  |
| H  | 0.13946  | 4.90273  | 4.79842  |
| C  | 1.34272  | 2.51648  | 3.65214  |
| C  | 0.17205  | 2.22858  | 4.34761  |
| H  | -0.64251 | 2.94571  | 4.40557  |
| O  | 2.31945  | 1.66425  | 3.61295  |
| C  | 0.05211  | 0.96911  | 4.99203  |
| H  | 0.71208  | 0.20446  | 4.5739   |
| C  | -1.28464 | 0.46615  | 5.43211  |
| H  | -1.89881 | 1.24802  | 5.89324  |
| H  | -1.83431 | 0.09387  | 4.55781  |
| H  | -1.19782 | -0.37575 | 6.1294   |
| H  | -1.01325 | 5.12453  | 3.47091  |
| C  | 0.01331  | 6.92168  | 4.06279  |
| C  | -0.96017 | 7.74849  | 3.50032  |
| C  | 1.04987  | 7.4912   | 4.81046  |

|   |          |          |          |
|---|----------|----------|----------|
| C | -0.90314 | 9.12782  | 3.68627  |
| H | -1.77151 | 7.30976  | 2.91919  |
| C | 1.10906  | 8.8672   | 4.99335  |
| H | 1.812    | 6.84635  | 5.25298  |
| C | 0.13095  | 9.68714  | 4.43111  |
| H | -1.66895 | 9.76512  | 3.25027  |
| H | 1.91349  | 9.30424  | 5.58106  |
| H | 0.17451  | 10.76382 | 4.57866  |
| C | 1.54539  | -0.3638  | 6.93531  |
| C | 0.75576  | -0.75053 | 8.03172  |
| C | 0.74486  | -2.04488 | 8.53858  |
| C | 1.57902  | -2.96551 | 7.9113   |
| C | 2.37687  | -2.59957 | 6.81751  |
| C | 2.362    | -1.30354 | 6.31221  |
| C | 0.37813  | 1.43096  | 7.69416  |
| H | 0.12526  | -2.33196 | 9.38534  |
| H | 1.61112  | -3.98803 | 8.27896  |
| H | 3.02119  | -3.34846 | 6.35959  |
| H | 2.97207  | -1.019   | 5.45414  |
| H | -0.06796 | 2.40269  | 7.87839  |
| N | 0.05086  | 0.38516  | 8.46411  |
| C | -0.91112 | 0.37956  | 9.54922  |
| H | -1.75069 | -0.27984 | 9.30475  |
| H | -0.43352 | 0.02333  | 10.46687 |
| H | -1.284   | 1.39236  | 9.70927  |
| C | 1.23819  | 1.02683  | 6.64323  |
| H | 1.96312  | 1.69508  | 6.19029  |

---

**TSA<sub>2R</sub>**

|   |          |          |          |
|---|----------|----------|----------|
| N | 3.66066  | -0.15461 | 3.12942  |
| N | 1.89285  | 0.72228  | 1.13331  |
| N | 4.62892  | 1.45626  | 0.55698  |
| N | 5.32746  | 2.89029  | 2.71801  |
| C | 4.51768  | -0.62287 | 4.0244   |
| C | 4.37722  | -1.86318 | 4.70504  |
| C | 3.25029  | -2.60747 | 4.48891  |
| H | 3.07404  | -3.54771 | 5.01268  |
| C | 2.27795  | -2.13285 | 3.57491  |
| C | 1.05982  | -2.81674 | 3.36672  |
| H | 0.88096  | -3.74513 | 3.90742  |
| C | 0.11616  | -2.30651 | 2.50761  |
| H | -0.83342 | -2.81616 | 2.3608   |
| C | 0.38662  | -1.132   | 1.78628  |
| H | -0.36659 | -0.76368 | 1.09437  |
| C | 1.58553  | -0.45493 | 1.92349  |
| C | 2.54052  | -0.91317 | 2.87247  |
| C | 0.69467  | 1.55265  | 0.91168  |
| H | 1.00368  | 2.51121  | 0.48564  |
| H | 0.20867  | 1.73739  | 1.87565  |
| H | -0.03399 | 1.09021  | 0.23015  |
| C | 2.51391  | 0.40291  | -0.21133 |
| H | 2.26438  | 1.27998  | -0.82806 |
| C | 1.91172  | -0.82715 | -0.89047 |
| H | 2.14005  | -1.71762 | -0.28622 |
| H | 0.81709  | -0.74018 | -0.90626 |
| C | 2.44966  | -1.02321 | -2.30169 |
| H | 2.02157  | -1.93342 | -2.7365  |

|    |          |          |          |
|----|----------|----------|----------|
| H  | 2.12285  | -0.19069 | -2.94305 |
| C  | 3.96878  | -1.08532 | -2.29145 |
| H  | 4.36139  | -1.17519 | -3.31042 |
| H  | 4.30456  | -1.98329 | -1.74983 |
| C  | 4.53333  | 0.16172  | -1.62659 |
| H  | 4.19365  | 1.04119  | -2.19416 |
| H  | 5.62708  | 0.18118  | -1.67829 |
| C  | 4.04307  | 0.29909  | -0.17657 |
| H  | 4.32639  | -0.59218 | 0.40598  |
| C  | 4.6044   | 2.71107  | -0.23481 |
| H  | 5.29911  | 2.67698  | -1.08303 |
| H  | 4.88632  | 3.54145  | 0.41717  |
| H  | 3.58935  | 2.89371  | -0.60385 |
| C  | 6.32544  | 2.14747  | 2.14217  |
| C  | 5.95312  | 1.25693  | 1.09813  |
| C  | 6.86383  | 0.30553  | 0.68301  |
| H  | 6.59629  | -0.43593 | -0.06353 |
| C  | 8.17532  | 0.29274  | 1.2046   |
| H  | 8.8739   | -0.45855 | 0.8446   |
| C  | 8.59004  | 1.24066  | 2.11066  |
| H  | 9.618    | 1.25743  | 2.46753  |
| C  | 7.66784  | 2.18787  | 2.61297  |
| C  | 7.9888   | 3.13719  | 3.61676  |
| H  | 9.01367  | 3.20048  | 3.98275  |
| C  | 6.99353  | 3.93424  | 4.12547  |
| C  | 5.66359  | 3.74343  | 3.67111  |
| C  | 5.77018  | 0.06104  | 4.47982  |
| H  | 5.63975  | 1.14167  | 4.61044  |
| H  | 6.55572  | -0.07558 | 3.71944  |
| C  | 6.13357  | -0.67507 | 5.7767   |
| H  | 7.20877  | -0.67805 | 5.97587  |
| H  | 5.6485   | -0.17945 | 6.62703  |
| C  | 5.55208  | -2.08683 | 5.60729  |
| H  | 6.27688  | -2.75315 | 5.11589  |
| H  | 5.28883  | -2.56593 | 6.55652  |
| C  | 4.71285  | 4.61424  | 4.43435  |
| H  | 3.79235  | 4.08287  | 4.70946  |
| H  | 4.40679  | 5.4645   | 3.80243  |
| C  | 5.54844  | 5.07222  | 5.64108  |
| H  | 5.39755  | 4.37342  | 6.4733   |
| H  | 5.26709  | 6.06566  | 6.00214  |
| C  | 7.01456  | 5.00174  | 5.17675  |
| H  | 7.3325   | 5.95564  | 4.73039  |
| H  | 7.71519  | 4.79644  | 5.99313  |
| Fe | 3.36806  | 1.95686  | 2.36517  |
| C  | 1.55525  | 4.20633  | 3.01137  |
| C  | 2.60834  | 5.12293  | 1.36053  |
| H  | 3.27205  | 5.20771  | 0.50936  |
| C  | 1.82361  | 6.10058  | 1.92276  |
| H  | 1.68869  | 7.14766  | 1.68782  |
| N  | 2.44646  | 3.95563  | 2.04291  |
| N  | 1.16414  | 5.51504  | 2.97069  |
| C  | 0.2731   | 6.22221  | 3.91687  |
| H  | 0.45883  | 5.77558  | 4.90099  |
| C  | 1.22638  | 3.14078  | 3.9582   |
| C  | 0.12241  | 3.16456  | 4.81044  |
| H  | -0.67043 | 3.89245  | 4.65229  |

|   |          |          |         |
|---|----------|----------|---------|
| O | 2.03283  | 2.12891  | 3.92476 |
| C | -0.05175 | 2.1811   | 5.81137 |
| H | 0.87391  | 1.73197  | 6.17314 |
| C | -1.14465 | 2.35531  | 6.81451 |
| H | -2.09716 | 2.61243  | 6.33597 |
| H | -1.29551 | 1.46516  | 7.43345 |
| H | -0.88778 | 3.17957  | 7.49286 |
| H | -0.76479 | 5.99789  | 3.63949 |
| C | 0.51704  | 7.69964  | 3.9328  |
| C | -0.34904 | 8.5678   | 3.26539 |
| C | 1.62853  | 8.21958  | 4.60395 |
| C | -0.11048 | 9.93968  | 3.27059 |
| H | -1.22035 | 8.16773  | 2.74605 |
| C | 1.86734  | 9.58871  | 4.60893 |
| H | 2.30342  | 7.54355  | 5.13278 |
| C | 0.99721  | 10.45006 | 3.94136 |
| H | -0.7941  | 10.61037 | 2.75517 |
| H | 2.72739  | 9.98885  | 5.14147 |
| H | 1.18081  | 11.52207 | 3.95099 |
| C | -2.70202 | -0.21055 | 5.14591 |
| C | -1.88589 | 0.58861  | 4.31997 |
| C | -2.49313 | 1.38112  | 3.34466 |
| C | -3.87865 | 1.34475  | 3.22067 |
| C | -4.66523 | 0.53974  | 4.05675 |
| C | -4.08755 | -0.25244 | 5.04225 |
| C | -0.59024 | -0.55663 | 5.79185 |
| H | -1.89664 | 2.02072  | 2.69503 |
| H | -4.36576 | 1.95077  | 2.46018 |
| H | -5.74533 | 0.53558  | 3.93453 |
| H | -4.6974  | -0.87256 | 5.69574 |
| H | 0.21047  | -0.98953 | 6.38316 |
| N | -1.86664 | -0.89477 | 6.03763 |
| C | -2.34158 | -1.78293 | 7.07922 |
| H | -2.97194 | -1.23424 | 7.78725 |
| H | -2.92843 | -2.59521 | 6.63929 |
| H | -1.48875 | -2.20582 | 7.61278 |
| C | -0.51845 | 0.42909  | 4.78548 |
| H | 0.37483  | 0.55118  | 4.17563 |

---

**IntA<sub>3S</sub>**

|   |          |          |          |
|---|----------|----------|----------|
| N | 0.80097  | -1.94708 | -0.42002 |
| N | -0.66744 | -1.21911 | -2.71553 |
| N | 1.92582  | 0.02952  | -2.76046 |
| N | 2.09104  | 1.19122  | -0.33931 |
| C | 1.44191  | -2.30111 | 0.68287  |
| C | 1.47359  | -3.61611 | 1.2143   |
| C | 0.75072  | -4.59424 | 0.58957  |
| H | 0.71885  | -5.61674 | 0.96821  |
| C | -0.02859 | -4.25244 | -0.54068 |
| C | -0.91661 | -5.18054 | -1.12528 |
| H | -0.94961 | -6.19585 | -0.73201 |
| C | -1.74553 | -4.79155 | -2.14934 |
| H | -2.45455 | -5.49152 | -2.58417 |
| C | -1.66809 | -3.48267 | -2.65413 |
| H | -2.32753 | -3.20284 | -3.47174 |
| C | -0.76742 | -2.55623 | -2.15659 |
| C | 0.03942  | -2.90992 | -1.04015 |



|    |          |          |          |
|----|----------|----------|----------|
| C  | -2.00749 | -0.63475 | -2.93869 |
| H  | -1.89363 | 0.43549  | -3.14012 |
| H  | -2.60183 | -0.75913 | -2.03012 |
| H  | -2.53997 | -1.09562 | -3.78289 |
| C  | 0.1262   | -1.14338 | -3.9991  |
| H  | -0.19576 | -0.18889 | -4.44409 |
| C  | -0.18357 | -2.25188 | -5.00696 |
| H  | 0.09439  | -3.22218 | -4.57127 |
| H  | -1.26558 | -2.29039 | -5.18947 |
| C  | 0.56394  | -2.07123 | -6.32209 |
| H  | 0.327    | -2.90349 | -6.99427 |
| H  | 0.21744  | -1.15738 | -6.82813 |
| C  | 2.05972  | -1.97619 | -6.07248 |
| H  | 2.60353  | -1.81136 | -7.00938 |
| H  | 2.43242  | -2.92602 | -5.65891 |
| C  | 2.34154  | -0.83791 | -5.10383 |
| H  | 1.96611  | 0.09289  | -5.55379 |
| H  | 3.41785  | -0.6873  | -4.96407 |
| C  | 1.63647  | -1.04385 | -3.75462 |
| H  | 1.98101  | -1.98035 | -3.28684 |
| C  | 1.82726  | 1.39161  | -3.34724 |
| H  | 2.64688  | 1.59695  | -4.0464  |
| H  | 1.85734  | 2.1278   | -2.53994 |
| H  | 0.87022  | 1.49358  | -3.87033 |
| C  | 3.25393  | 0.66254  | -0.83708 |
| C  | 3.16855  | -0.09325 | -2.03903 |
| C  | 4.25659  | -0.85049 | -2.42652 |
| H  | 4.20765  | -1.48782 | -3.30416 |
| C  | 5.46805  | -0.78868 | -1.70574 |
| H  | 6.31048  | -1.38595 | -2.04565 |
| C  | 5.60912  | 0.04881  | -0.62495 |
| H  | 6.56284  | 0.13522  | -0.1078  |
| C  | 4.49978  | 0.79004  | -0.15708 |
| C  | 4.5432   | 1.60858  | 1.00021  |
| H  | 5.48824  | 1.73567  | 1.52876  |
| C  | 3.38403  | 2.19269  | 1.44485  |
| C  | 2.17316  | 1.91975  | 0.7606   |
| C  | 2.20819  | -1.37694 | 1.5825   |
| H  | 1.70263  | -0.412   | 1.7075   |
| H  | 3.19736  | -1.16174 | 1.15026  |
| C  | 2.34219  | -2.17401 | 2.88809  |
| H  | 3.24174  | -1.91585 | 3.45482  |
| H  | 1.47878  | -1.96149 | 3.5359   |
| C  | 2.30009  | -3.65058 | 2.46313  |
| H  | 3.3113   | -4.02328 | 2.24266  |
| H  | 1.88761  | -4.31157 | 3.23436  |
| C  | 1.00773  | 2.51095  | 1.49739  |
| H  | 0.14629  | 1.82865  | 1.52725  |
| H  | 0.663    | 3.42319  | 0.98453  |
| C  | 1.59988  | 2.82792  | 2.88048  |
| H  | 1.47795  | 1.95293  | 3.53692  |
| H  | 1.11289  | 3.67432  | 3.3747   |
| C  | 3.1011   | 3.05978  | 2.63453  |
| H  | 3.29608  | 4.11352  | 2.38633  |
| H  | 3.72332  | 2.82698  | 3.50515  |
| Fe | 0.32077  | 0.13575  | -1.16964 |
| C  | -1.71708 | 2.16463  | -0.4332  |

|   |          |          |          |
|---|----------|----------|----------|
| C | -0.63998 | 3.33665  | -1.90023 |
| H | 0.05799  | 3.56097  | -2.69667 |
| C | -1.51826 | 4.18895  | -1.28475 |
| H | -1.72573 | 5.24114  | -1.42047 |
| N | -0.76146 | 2.08256  | -1.36915 |
| N | -2.19344 | 3.4398   | -0.35153 |
| C | -3.1982  | 3.95162  | 0.59998  |
| H | -2.9208  | 3.55311  | 1.58499  |
| C | -2.04724 | 0.96845  | 0.34363  |
| C | -3.04791 | 0.81603  | 1.261    |
| H | -3.75368 | 1.60866  | 1.48542  |
| O | -1.23067 | -0.04158 | 0.09144  |
| C | -3.22745 | -0.50384 | 1.93275  |
| H | -3.35681 | -1.27678 | 1.15584  |
| C | -4.40732 | -0.54627 | 2.88933  |
| H | -4.3216  | 0.22143  | 3.66932  |
| H | -5.34392 | -0.35953 | 2.35381  |
| H | -4.49777 | -1.5218  | 3.38106  |
| H | -4.16973 | 3.51943  | 0.32769  |
| C | -3.25908 | 5.44735  | 0.62713  |
| C | -4.18635 | 6.13533  | -0.15879 |
| C | -2.3647  | 6.1699   | 1.42224  |
| C | -4.221   | 7.52681  | -0.14739 |
| H | -4.88832 | 5.57669  | -0.7784  |
| C | -2.39964 | 7.55972  | 1.436    |
| H | -1.63977 | 5.63435  | 2.03844  |
| C | -3.3285  | 8.23916  | 0.64989  |
| H | -4.95122 | 8.05538  | -0.75598 |
| H | -1.70769 | 8.1158   | 2.06483  |
| H | -3.36055 | 9.32621  | 0.66392  |
| C | -1.7787  | -2.40404 | 3.0327   |
| C | -1.31445 | -2.4559  | 4.35156  |
| C | -1.05826 | -3.63654 | 5.03509  |
| C | -1.30803 | -4.81616 | 4.33662  |
| C | -1.78769 | -4.7916  | 3.02166  |
| C | -2.02406 | -3.58969 | 2.35397  |
| C | -1.51052 | -0.27805 | 3.85059  |
| H | -0.69629 | -3.65271 | 6.06081  |
| H | -1.13813 | -5.77085 | 4.82804  |
| H | -1.98368 | -5.73298 | 2.51152  |
| H | -2.3892  | -3.58364 | 1.32725  |
| H | -1.49516 | 0.79436  | 4.02692  |
| N | -1.17362 | -1.1204  | 4.80549  |
| C | -0.7241  | -0.77903 | 6.14549  |
| H | -1.40944 | -1.20948 | 6.88119  |
| H | 0.27791  | -1.18797 | 6.30756  |
| H | -0.70122 | 0.30556  | 6.25759  |
| C | -1.88872 | -0.97582 | 2.62818  |
| H | -1.14813 | -0.74668 | 1.81889  |

---

**IntA<sub>3R</sub>**

|   |          |          |          |
|---|----------|----------|----------|
| N | 1.17039  | -2.05131 | 0.16471  |
| N | -0.65273 | -1.20593 | -1.78876 |
| N | 2.06181  | -0.52981 | -2.46977 |
| N | 2.83022  | 0.97767  | -0.37595 |
| C | 2.04907  | -2.50636 | 1.04317  |
| C | 1.88603  | -3.69581 | 1.80807  |

|   |          |          |          |
|---|----------|----------|----------|
| C | 0.71362  | -4.39117 | 1.69953  |
| H | 0.52033  | -5.28719 | 2.29057  |
| C | -0.28159 | -3.92254 | 0.80598  |
| C | -1.54235 | -4.55238 | 0.70109  |
| H | -1.73739 | -5.44    | 1.30328  |
| C | -2.49906 | -4.04956 | -0.14999 |
| H | -3.47388 | -4.52735 | -0.23581 |
| C | -2.21199 | -2.93362 | -0.95317 |
| H | -2.98048 | -2.57208 | -1.63222 |
| C | -0.97565 | -2.3117  | -0.91514 |
| C | 0.00444  | -2.76482 | 0.01379  |
| C | -1.82238 | -0.34452 | -2.03459 |
| H | -1.48596 | 0.57407  | -2.52337 |
| H | -2.2714  | -0.07911 | -1.07203 |
| H | -2.58582 | -0.81863 | -2.67009 |
| C | -0.06968 | -1.6322  | -3.11756 |
| H | -0.34409 | -0.8113  | -3.79725 |
| C | -0.68262 | -2.91616 | -3.67396 |
| H | -0.42267 | -3.7553  | -3.01102 |
| H | -1.77846 | -2.83969 | -3.65596 |
| C | -0.19461 | -3.21553 | -5.08549 |
| H | -0.61552 | -4.16719 | -5.42915 |
| H | -0.56889 | -2.44518 | -5.77667 |
| C | 1.32523  | -3.24138 | -5.13659 |
| H | 1.67529  | -3.39572 | -6.1634  |
| H | 1.70634  | -4.09125 | -4.54908 |
| C | 1.89053  | -1.93971 | -4.58583 |
| H | 1.50421  | -1.10681 | -5.19289 |
| H | 2.97947  | -1.90279 | -4.69329 |
| C | 1.46132  | -1.7222  | -3.12544 |
| H | 1.77251  | -2.58223 | -2.51123 |
| C | 1.98787  | 0.68768  | -3.31346 |
| H | 2.61103  | 0.60418  | -4.2126  |
| H | 2.33199  | 1.54297  | -2.72701 |
| H | 0.94803  | 0.87005  | -3.60766 |
| C | 3.81146  | 0.22979  | -0.97313 |
| C | 3.40775  | -0.69552 | -1.97515 |
| C | 4.31314  | -1.64974 | -2.39698 |
| H | 4.02472  | -2.41767 | -3.10787 |
| C | 5.64478  | -1.63325 | -1.92994 |
| H | 6.33712  | -2.38731 | -2.2963  |
| C | 6.08417  | -0.65435 | -1.06985 |
| H | 7.12526  | -0.61563 | -0.75539 |
| C | 5.17131  | 0.29644  | -0.55779 |
| C | 5.52275  | 1.27618  | 0.40601  |
| H | 6.56131  | 1.35991  | 0.72645  |
| C | 4.54002  | 2.07488  | 0.93546  |
| C | 3.19474  | 1.85709  | 0.54256  |
| C | 3.35053  | -1.85434 | 1.39923  |
| H | 3.26552  | -0.76472 | 1.48018  |
| H | 4.08973  | -2.05836 | 0.60777  |
| C | 3.74979  | -2.53479 | 2.71497  |
| H | 4.83289  | -2.57988 | 2.85762  |
| H | 3.33554  | -1.96992 | 3.55934  |
| C | 3.09584  | -3.9243  | 2.66072  |
| H | 3.76123  | -4.65157 | 2.17164  |
| H | 2.86342  | -4.33616 | 3.64873  |

|    |          |          |          |
|----|----------|----------|----------|
| C  | 2.26461  | 2.73179  | 1.32599  |
| H  | 1.36594  | 2.19324  | 1.65517  |
| H  | 1.91453  | 3.55915  | 0.68658  |
| C  | 3.14553  | 3.23462  | 2.48176  |
| H  | 3.04051  | 2.55899  | 3.33978  |
| H  | 2.86641  | 4.23456  | 2.82632  |
| C  | 4.59119  | 3.17075  | 1.95603  |
| H  | 4.87437  | 4.1161   | 1.46951  |
| H  | 5.33024  | 2.99844  | 2.7457   |
| Fe | 0.84927  | 0.07416  | -0.63305 |
| C  | -0.88945 | 2.3414   | 0.06939  |
| C  | 0.12242  | 3.24444  | -1.61933 |
| H  | 0.7503   | 3.31253  | -2.4987  |
| C  | -0.59909 | 4.24006  | -1.01488 |
| H  | -0.71326 | 5.29241  | -1.23538 |
| N  | -0.05457 | 2.07109  | -0.94089 |
| N  | -1.23271 | 3.66182  | 0.05987  |
| C  | -2.06489 | 4.37528  | 1.04818  |
| H  | -1.81858 | 3.9412   | 2.02548  |
| C  | -1.22487 | 1.27194  | 1.01523  |
| C  | -2.26313 | 1.30118  | 1.90408  |
| H  | -2.97591 | 2.12097  | 1.90799  |
| O  | -0.44238 | 0.21563  | 0.91173  |
| C  | -2.51276 | 0.15639  | 2.82066  |
| H  | -1.56928 | -0.1145  | 3.31967  |
| C  | -3.58446 | 0.45039  | 3.85666  |
| H  | -4.54745 | 0.67964  | 3.3832   |
| H  | -3.74011 | -0.39371 | 4.54047  |
| H  | -3.30304 | 1.31641  | 4.46436  |
| H  | -3.11784 | 4.14431  | 0.83898  |
| C  | -1.83245 | 5.85479  | 1.03412  |
| C  | -2.73665 | 6.70834  | 0.39916  |
| C  | -0.69416 | 6.39219  | 1.64297  |
| C  | -2.50912 | 8.08181  | 0.37479  |
| H  | -3.62892 | 6.29469  | -0.07187 |
| C  | -0.46556 | 7.76292  | 1.61854  |
| H  | 0.01075  | 5.72727  | 2.14552  |
| C  | -1.37386 | 8.60917  | 0.98348  |
| H  | -3.22279 | 8.74088  | -0.1144  |
| H  | 0.41703  | 8.17609  | 2.10219  |
| H  | -1.1985  | 9.68256  | 0.97009  |
| C  | -4.91138 | -2.24455 | 1.61488  |
| C  | -4.16088 | -1.12948 | 1.22552  |
| C  | -4.70446 | -0.25331 | 0.29404  |
| C  | -5.96576 | -0.53723 | -0.23135 |
| C  | -6.68148 | -1.67364 | 0.16007  |
| C  | -6.16391 | -2.5557  | 1.10603  |
| C  | -3.0022  | -2.36094 | 2.77947  |
| H  | -4.16012 | 0.63913  | -0.00885 |
| H  | -6.40646 | 0.14062  | -0.95845 |
| H  | -7.66068 | -1.86733 | -0.26988 |
| H  | -6.72241 | -3.43272 | 1.42579  |
| H  | -2.28768 | -2.76492 | 3.49167  |
| N  | -4.15807 | -2.9525  | 2.58475  |
| C  | -4.62046 | -4.17851 | 3.21178  |
| H  | -5.56331 | -3.99063 | 3.73335  |
| H  | -4.78351 | -4.93974 | 2.44196  |

|   |          |          |         |
|---|----------|----------|---------|
| H | -3.87242 | -4.53012 | 3.92356 |
| C | -2.86724 | -1.14535 | 1.97304 |
| H | -1.98351 | -1.23928 | 1.30811 |

---

**TSA<sub>4s</sub>**

|   |         |          |          |
|---|---------|----------|----------|
| N | 3.87657 | -0.3312  | 2.91102  |
| N | 2.39667 | 0.46505  | 0.65107  |
| N | 5.05402 | 1.59922  | 0.58717  |
| N | 5.26754 | 2.76861  | 2.99029  |
| C | 4.57367 | -0.73862 | 3.96221  |
| C | 4.61873 | -2.0758  | 4.43312  |
| C | 3.8282  | -3.01321 | 3.8285   |
| H | 3.79731 | -4.04739 | 4.1728   |
| C | 2.98717 | -2.61352 | 2.76367  |
| C | 2.04572 | -3.49999 | 2.1999   |
| H | 2.00296 | -4.52404 | 2.56813  |
| C | 1.17903 | -3.06095 | 1.22842  |
| H | 0.42956 | -3.72913 | 0.81159  |
| C | 1.27918 | -1.74603 | 0.74338  |
| H | 0.60254 | -1.43323 | -0.04786 |
| C | 2.2337  | -0.86279 | 1.21832  |
| C | 3.06709 | -1.26149 | 2.29817  |
| C | 1.08825 | 1.10545  | 0.40102  |
| H | 1.25156 | 2.16286  | 0.16964  |
| H | 0.47647 | 1.03078  | 1.30439  |
| H | 0.5413  | 0.64957  | -0.43625 |
| C | 3.20264 | 0.48121  | -0.63122 |
| H | 2.92237 | 1.43806  | -1.09868 |
| C | 2.84841 | -0.6359  | -1.61491 |
| H | 3.09148 | -1.60667 | -1.1595  |
| H | 1.76499 | -0.63908 | -1.79249 |
| C | 3.59625 | -0.50865 | -2.93591 |
| H | 3.32814 | -1.34634 | -3.58926 |
| H | 3.27923 | 0.40552  | -3.46037 |
| C | 5.09541 | -0.45981 | -2.69448 |
| H | 5.63916 | -0.32855 | -3.63663 |
| H | 5.43924 | -1.41424 | -2.26692 |
| C | 5.41992 | 0.68451  | -1.74667 |
| H | 5.0712  | 1.61966  | -2.20931 |
| H | 6.50104 | 0.80304  | -1.61604 |
| C | 4.7165  | 0.5229   | -0.38999 |
| H | 5.02735 | -0.41955 | 0.0894   |
| C | 4.99101 | 2.95642  | -0.01565 |
| H | 5.80811 | 3.12819  | -0.72647 |
| H | 5.05726 | 3.69961  | 0.78301  |
| H | 4.03114 | 3.08369  | -0.52764 |
| C | 6.41642 | 2.21502  | 2.48857  |
| C | 6.30385 | 1.45066  | 1.29512  |
| C | 7.37229 | 0.6684   | 0.90457  |
| H | 7.30255 | 0.02214  | 0.03492  |
| C | 8.59142 | 0.71515  | 1.61466  |
| H | 9.41939 | 0.09912  | 1.27281  |
| C | 8.75841 | 1.55811  | 2.68786  |
| H | 9.71785 | 1.62776  | 3.19677  |
| C | 7.66722 | 2.32248  | 3.1617   |
| C | 7.72775 | 3.13338  | 4.32421  |
| H | 8.67565 | 3.23785  | 4.85248  |

|    |          |          |         |
|----|----------|----------|---------|
| C  | 6.58026  | 3.73483  | 4.77724 |
| C  | 5.36477  | 3.49522  | 4.08928 |
| C  | 5.41951  | 0.13308  | 4.8419  |
| H  | 4.9344   | 1.09406  | 5.05932 |
| H  | 6.36799  | 0.36669  | 4.33608 |
| C  | 5.66926  | -0.73281 | 6.0851  |
| H  | 6.62634  | -0.51659 | 6.56902 |
| H  | 4.87969  | -0.54691 | 6.82549 |
| C  | 5.55552  | -2.18422 | 5.59588 |
| H  | 6.53201  | -2.56384 | 5.26053 |
| H  | 5.20263  | -2.87523 | 6.3701  |
| C  | 4.21424  | 4.1224   | 4.81587 |
| H  | 3.32214  | 3.48086  | 4.81155 |
| H  | 3.92545  | 5.05846  | 4.31153 |
| C  | 4.80028  | 4.39166  | 6.21067 |
| H  | 4.64942  | 3.50451  | 6.84402 |
| H  | 4.33156  | 5.2386   | 6.72046 |
| C  | 6.30941  | 4.59054  | 5.97868 |
| H  | 6.53111  | 5.64312  | 5.74869 |
| H  | 6.91971  | 4.3293   | 6.84953 |
| Fe | 3.47982  | 1.76174  | 2.18543 |
| C  | 1.35706  | 3.77614  | 2.81734 |
| C  | 2.55233  | 4.92413  | 1.42568 |
| H  | 3.32732  | 5.14181  | 0.70269 |
| C  | 1.59079  | 5.76959  | 1.91099 |
| H  | 1.37416  | 6.81134  | 1.72005 |
| N  | 2.40723  | 3.68573  | 1.99013 |
| N  | 0.83869  | 5.03608  | 2.79688 |
| C  | -0.29224 | 5.54785  | 3.59735 |
| H  | -0.16694 | 5.13406  | 4.60637 |
| C  | 0.95379  | 2.61287  | 3.5883  |
| C  | -0.17328 | 2.40582  | 4.31044 |
| H  | -0.95797 | 3.1527   | 4.36228 |
| O  | 1.88336  | 1.62628  | 3.51846 |
| C  | -0.38508 | 1.09058  | 5.0041  |
| H  | -0.60183 | 0.33358  | 4.22778 |
| C  | -1.54577 | 1.11296  | 5.98977 |
| H  | -1.38203 | 1.85748  | 6.77844 |
| H  | -2.48418 | 1.36444  | 5.48316 |
| H  | -1.67577 | 0.13705  | 6.4691  |
| H  | -1.21759 | 5.12981  | 3.18009 |
| C  | -0.34355 | 7.04398  | 3.62846 |
| C  | -1.2259  | 7.74058  | 2.80021 |
| C  | 0.50923  | 7.75759  | 4.4767  |
| C  | -1.25958 | 9.13232  | 2.82262 |
| H  | -1.89649 | 7.18947  | 2.14054 |
| C  | 0.47687  | 9.14688  | 4.49883 |
| H  | 1.19782  | 7.2161   | 5.12793 |
| C  | -0.40862 | 9.83557  | 3.671   |
| H  | -1.95579 | 9.66747  | 2.18097 |
| H  | 1.13565  | 9.69594  | 5.16806 |
| H  | -0.43915 | 10.92249 | 3.693   |
| C  | 1.19381  | -0.80507 | 5.96011 |
| C  | 2.03223  | -0.84437 | 7.09034 |
| C  | 2.51591  | -2.02702 | 7.64196 |
| C  | 2.10231  | -3.20963 | 7.03907 |
| C  | 1.24921  | -3.19671 | 5.92502 |

|   |         |          |         |
|---|---------|----------|---------|
| C | 0.79876 | -2.00469 | 5.36853 |
| C | 1.54189 | 1.30638  | 6.72573 |
| H | 3.16751 | -2.03399 | 8.51407 |
| H | 2.43471 | -4.16075 | 7.44873 |
| H | 0.92917 | -4.14282 | 5.49243 |
| H | 0.1407  | -2.01093 | 4.50006 |
| H | 1.53839 | 2.3754   | 6.92113 |
| N | 2.22302 | 0.47569  | 7.5232  |
| C | 3.01715 | 0.85139  | 8.67768 |
| H | 2.67697 | 0.29496  | 9.55595 |
| H | 4.07681 | 0.63062  | 8.50603 |
| H | 2.89805 | 1.91978  | 8.86619 |
| C | 0.92379 | 0.60282  | 5.65746 |
| H | 1.66034 | 0.9569   | 4.62672 |

---

**TSA<sub>4R</sub>**

---

|   |          |          |          |
|---|----------|----------|----------|
| N | 3.07983  | 0.02057  | 3.32819  |
| N | 1.50803  | 0.79453  | 1.13349  |
| N | 4.26973  | 1.39575  | 0.6095   |
| N | 5.06488  | 2.67988  | 2.829    |
| C | 3.76437  | -0.32424 | 4.40733  |
| C | 3.69903  | -1.60083 | 5.02577  |
| C | 2.83212  | -2.53211 | 4.52016  |
| H | 2.73725  | -3.52668 | 4.95908  |
| C | 1.99364  | -2.17232 | 3.4365   |
| C | 0.96727  | -3.02642 | 2.97772  |
| H | 0.87129  | -4.0193  | 3.41683  |
| C | 0.08645  | -2.5916  | 2.01671  |
| H | -0.73333 | -3.22696 | 1.68932  |
| C | 0.24581  | -1.32068 | 1.43897  |
| H | -0.46873 | -1.00082 | 0.6854   |
| C | 1.29441  | -0.48685 | 1.78702  |
| C | 2.1599   | -0.87852 | 2.84518  |
| C | 0.26817  | 1.59577  | 1.11394  |
| H | 0.49003  | 2.57434  | 0.6782   |
| H | -0.07591 | 1.73948  | 2.14324  |
| H | -0.54299 | 1.12778  | 0.53779  |
| C | 2.07317  | 0.67943  | -0.26458 |
| H | 1.94154  | 1.69331  | -0.67613 |
| C | 1.33112  | -0.29599 | -1.17976 |
| H | 1.40044  | -1.3084  | -0.75854 |
| H | 0.26459  | -0.03541 | -1.20615 |
| C | 1.90638  | -0.33063 | -2.58854 |
| H | 1.34251  | -1.0472  | -3.1961  |
| H | 1.78504  | 0.6497   | -3.07408 |
| C | 3.38049  | -0.69516 | -2.53565 |
| H | 3.81737  | -0.71548 | -3.54019 |
| H | 3.50203  | -1.7087  | -2.12326 |
| C | 4.12017  | 0.31846  | -1.67667 |
| H | 3.99472  | 1.30452  | -2.14603 |
| H | 5.19933  | 0.12701  | -1.67026 |
| C | 3.57704  | 0.38162  | -0.24198 |
| H | 3.73079  | -0.58744 | 0.26068  |
| C | 4.46896  | 2.68588  | -0.10333 |
| H | 5.2689   | 2.61948  | -0.85016 |
| H | 4.72599  | 3.46165  | 0.62172  |
| H | 3.53705  | 2.97119  | -0.6012  |

|    |          |          |          |
|----|----------|----------|----------|
| C  | 5.95911  | 1.78556  | 2.29711  |
| C  | 5.51732  | 0.984    | 1.20931  |
| C  | 6.30201  | -0.07388 | 0.79575  |
| H  | 5.97302  | -0.73199 | -0.00359 |
| C  | 7.56387  | -0.30178 | 1.38433  |
| H  | 8.16278  | -1.13834 | 1.03298  |
| C  | 8.06146  | 0.54551  | 2.34644  |
| H  | 9.05913  | 0.39857  | 2.7555   |
| C  | 7.26926  | 1.61351  | 2.82685  |
| C  | 7.69219  | 2.50241  | 3.84883  |
| H  | 8.69623  | 2.40244  | 4.26162  |
| C  | 6.81789  | 3.45661  | 4.30609  |
| C  | 5.49694  | 3.48153  | 3.78833  |
| C  | 4.67553  | 0.57499  | 5.18666  |
| H  | 4.26487  | 1.58917  | 5.27147  |
| H  | 5.64686  | 0.66574  | 4.67831  |
| C  | 4.83307  | -0.15385 | 6.53001  |
| H  | 5.79532  | 0.04411  | 7.01032  |
| H  | 4.05498  | 0.18416  | 7.22747  |
| C  | 4.62303  | -1.642   | 6.20436  |
| H  | 5.57347  | -2.11823 | 5.92152  |
| H  | 4.23083  | -2.22158 | 7.04814  |
| C  | 4.67232  | 4.50816  | 4.50296  |
| H  | 3.658    | 4.15299  | 4.72507  |
| H  | 4.55968  | 5.39737  | 3.86163  |
| C  | 5.5086   | 4.81965  | 5.75456  |
| H  | 5.20717  | 4.14876  | 6.56999  |
| H  | 5.37235  | 5.843    | 6.11593  |
| C  | 6.96413  | 4.51515  | 5.35709  |
| H  | 7.44705  | 5.4041   | 4.92464  |
| H  | 7.58776  | 4.20743  | 6.20314  |
| Fe | 2.99461  | 2.02599  | 2.36763  |
| C  | 1.48016  | 4.47682  | 3.09696  |
| C  | 2.41296  | 5.11825  | 1.24973  |
| H  | 2.96463  | 5.0495   | 0.32158  |
| C  | 1.83955  | 6.22783  | 1.80851  |
| H  | 1.80006  | 7.26136  | 1.49454  |
| N  | 2.19905  | 4.03227  | 2.05595  |
| N  | 1.25883  | 5.81663  | 2.98433  |
| C  | 0.59598  | 6.69918  | 3.96713  |
| H  | 0.9343   | 6.36328  | 4.95585  |
| C  | 1.12445  | 3.5663   | 4.17309  |
| C  | 0.25081  | 3.75477  | 5.19019  |
| H  | -0.34381 | 4.65961  | 5.25597  |
| O  | 1.79229  | 2.38998  | 4.06885  |
| C  | 0.05823  | 2.69871  | 6.24121  |
| H  | 0.93791  | 2.72241  | 6.91059  |
| C  | -1.1902  | 2.93434  | 7.08237  |
| H  | -2.0968  | 2.89882  | 6.46723  |
| H  | -1.28938 | 2.17649  | 7.86674  |
| H  | -1.15191 | 3.9162   | 7.56706  |
| H  | -0.48612 | 6.52482  | 3.90715  |
| C  | 0.92289  | 8.14346  | 3.74519  |
| C  | 0.03208  | 8.97563  | 3.06421  |
| C  | 2.14058  | 8.66233  | 4.19599  |
| C  | 0.35271  | 10.31174 | 2.83862  |
| H  | -0.9202  | 8.57655  | 2.71423  |



|   |          |          |         |
|---|----------|----------|---------|
| C | 2.46167  | 9.99596  | 3.97047 |
| H | 2.83546  | 8.01409  | 4.73345 |
| C | 1.56702  | 10.82143 | 3.29061 |
| H | -0.34907 | 10.95642 | 2.31442 |
| H | 3.40586  | 10.39669 | 4.3324  |
| H | 1.8153   | 11.86638 | 3.11889 |
| C | -1.12408 | -0.61935 | 5.03322 |
| C | -1.04764 | 0.76709  | 4.8066  |
| C | -1.96318 | 1.35427  | 3.93045 |
| C | -2.90925 | 0.54298  | 3.31281 |
| C | -2.95389 | -0.83912 | 3.54864 |
| C | -2.05745 | -1.44735 | 4.41852 |
| C | 0.50472  | 0.15523  | 6.35069 |
| H | -1.94755 | 2.42854  | 3.74847 |
| H | -3.64204 | 0.98941  | 2.64434 |
| H | -3.71345 | -1.44191 | 3.05653 |
| H | -2.0969  | -2.51713 | 4.61545 |
| H | 1.27228  | 0.10503  | 7.11806 |
| N | -0.15068 | -0.95052 | 5.98508 |
| C | 0.04641  | -2.28475 | 6.5156  |
| H | -0.84153 | -2.59958 | 7.07303 |
| H | 0.22198  | -2.98891 | 5.69559 |
| H | 0.91014  | -2.28469 | 7.18369 |
| C | 0.06584  | 1.28779  | 5.61275 |
| H | 1.04557  | 1.5653   | 4.7784  |

---

**IntA<sub>55</sub>**

|   |          |          |          |
|---|----------|----------|----------|
| N | 0.74189  | -1.85769 | -0.30565 |
| N | -0.68319 | -0.86126 | -2.51352 |
| N | 2.05878  | 0.07044  | -2.54102 |
| N | 2.31297  | 1.13987  | -0.08564 |
| C | 1.45104  | -2.38182 | 0.68835  |
| C | 1.38565  | -3.73915 | 1.09359  |
| C | 0.448    | -4.55503 | 0.52253  |
| H | 0.31699  | -5.58876 | 0.8419   |
| C | -0.40114 | -4.02501 | -0.47668 |
| C | -1.46799 | -4.77709 | -1.01281 |
| H | -1.62041 | -5.79538 | -0.65898 |
| C | -2.31309 | -4.21604 | -1.93934 |
| H | -3.15519 | -4.77897 | -2.3337  |
| C | -2.06903 | -2.91584 | -2.41248 |
| H | -2.72685 | -2.51019 | -3.17667 |
| C | -0.99946 | -2.16555 | -1.95624 |
| C | -0.18424 | -2.68012 | -0.91405 |
| C | -1.90748 | -0.08554 | -2.80303 |
| H | -1.62945 | 0.95107  | -3.01802 |
| H | -2.56198 | -0.10402 | -1.92669 |
| H | -2.46449 | -0.47668 | -3.66582 |
| C | 0.14907  | -0.93499 | -3.78083 |
| H | -0.0625  | 0.02118  | -4.2843  |
| C | -0.26247 | -2.0593  | -4.73232 |
| H | -0.0727  | -3.02793 | -4.24761 |
| H | -1.3442  | -2.01161 | -4.91288 |
| C | 0.49315  | -2.00219 | -6.05365 |
| H | 0.19168  | -2.84515 | -6.68512 |
| H | 0.21557  | -1.08993 | -6.60303 |
| C | 1.99362  | -2.0092  | -5.81146 |

|    |          |          |          |
|----|----------|----------|----------|
| H  | 2.54163  | -1.91689 | -6.75554 |
| H  | 2.29923  | -2.96922 | -5.36768 |
| C  | 2.37002  | -0.86391 | -4.88253 |
| H  | 2.06052  | 0.07953  | -5.35698 |
| H  | 3.45559  | -0.79118 | -4.75993 |
| C  | 1.66176  | -0.98176 | -3.52397 |
| H  | 1.91523  | -1.9409  | -3.04419 |
| C  | 2.06339  | 1.43221  | -3.13497 |
| H  | 2.87035  | 1.55598  | -3.86686 |
| H  | 2.2044   | 2.16566  | -2.33681 |
| H  | 1.10172  | 1.62389  | -3.62381 |
| C  | 3.44328  | 0.57511  | -0.61817 |
| C  | 3.30435  | -0.14402 | -1.83652 |
| C  | 4.34365  | -0.95006 | -2.25583 |
| H  | 4.24889  | -1.56845 | -3.14272 |
| C  | 5.56485  | -0.96932 | -1.54904 |
| H  | 6.3696   | -1.60332 | -1.91233 |
| C  | 5.7621   | -0.16768 | -0.44929 |
| H  | 6.7231   | -0.14954 | 0.06079  |
| C  | 4.69801  | 0.61551  | 0.05459  |
| C  | 4.78809  | 1.37661  | 1.24792  |
| H  | 5.74063  | 1.43116  | 1.77491  |
| C  | 3.65993  | 1.98863  | 1.73533  |
| C  | 2.43359  | 1.80808  | 1.0492   |
| C  | 2.41963  | -1.64213 | 1.56371  |
| H  | 2.02419  | -0.66874 | 1.88664  |
| H  | 3.34736  | -1.43963 | 1.0094   |
| C  | 2.67604  | -2.60821 | 2.73022  |
| H  | 3.68242  | -2.51091 | 3.14749  |
| H  | 1.96334  | -2.39888 | 3.53721  |
| C  | 2.38497  | -4.00821 | 2.1739   |
| H  | 3.29067  | -4.46126 | 1.74412  |
| H  | 2.01501  | -4.70544 | 2.93402  |
| C  | 1.30065  | 2.40994  | 1.82402  |
| H  | 0.40921  | 1.76642  | 1.82093  |
| H  | 0.99635  | 3.36403  | 1.36516  |
| C  | 1.91142  | 2.61672  | 3.21876  |
| H  | 1.74815  | 1.71104  | 3.81948  |
| H  | 1.46537  | 3.45303  | 3.76434  |
| C  | 3.42122  | 2.7944   | 2.97707  |
| H  | 3.66583  | 3.85082  | 2.79224  |
| H  | 4.03548  | 2.47943  | 3.82704  |
| Fe | 0.50845  | 0.28126  | -0.95804 |
| C  | -1.67752 | 2.22462  | -0.12493 |
| C  | -0.43111 | 3.37827  | -1.47199 |
| H  | 0.38287  | 3.60277  | -2.14825 |
| C  | -1.43423 | 4.20804  | -1.05016 |
| H  | -1.66349 | 5.24081  | -1.27067 |
| N  | -0.58395 | 2.14436  | -0.89895 |
| N  | -2.22109 | 3.47011  | -0.19845 |
| C  | -3.43177 | 3.95736  | 0.50259  |
| H  | -3.26635 | 3.79289  | 1.5752   |
| C  | -2.11554 | 1.07428  | 0.63428  |
| C  | -3.17732 | 0.8797   | 1.43809  |
| H  | -3.87267 | 1.69242  | 1.62169  |
| O  | -1.23077 | 0.02995  | 0.40051  |
| C  | -3.46493 | -0.45942 | 2.06791  |

|   |          |          |          |
|---|----------|----------|----------|
| H | -3.65486 | -1.1637  | 1.23525  |
| C | -4.72335 | -0.41536 | 2.93426  |
| H | -4.59243 | 0.27498  | 3.77574  |
| H | -5.5945  | -0.08928 | 2.3544   |
| H | -4.94343 | -1.40382 | 3.34877  |
| H | -4.26398 | 3.31472  | 0.18782  |
| C | -3.72396 | 5.39714  | 0.21655  |
| C | -4.54284 | 5.74959  | -0.86005 |
| C | -3.15946 | 6.40075  | 1.00919  |
| C | -4.79556 | 7.08915  | -1.13892 |
| H | -4.9914  | 4.96993  | -1.47631 |
| C | -3.41218 | 7.74     | 0.73024  |
| H | -2.52679 | 6.1294   | 1.85502  |
| C | -4.22985 | 8.08428  | -0.34442 |
| H | -5.44186 | 7.35689  | -1.97151 |
| H | -2.97898 | 8.516    | 1.35703  |
| H | -4.43361 | 9.13097  | -0.55809 |
| C | -1.96175 | -2.40617 | 2.9969   |
| C | -0.90683 | -2.48034 | 3.9426   |
| C | -0.36364 | -3.69641 | 4.3622   |
| C | -0.9004  | -4.85445 | 3.81696  |
| C | -1.94751 | -4.80354 | 2.87799  |
| C | -2.48252 | -3.59406 | 2.46239  |
| C | -1.4347  | -0.32384 | 3.67662  |
| H | 0.43354  | -3.7402  | 5.10341  |
| H | -0.51703 | -5.82108 | 4.13764  |
| H | -2.35623 | -5.73423 | 2.4886   |
| H | -3.30552 | -3.56994 | 1.74766  |
| H | -1.38016 | 0.74037  | 3.88696  |
| N | -0.60311 | -1.19216 | 4.33933  |
| C | 0.34881  | -0.83594 | 5.36665  |
| H | 0.20193  | -1.46399 | 6.25136  |
| H | 1.38467  | -0.95445 | 5.02186  |
| H | 0.19262  | 0.20531  | 5.65758  |
| C | -2.28552 | -1.01498 | 2.83461  |
| H | -1.26458 | -0.58987 | 1.17311  |

---

**IntA<sub>5R</sub>**

|   |          |          |          |
|---|----------|----------|----------|
| N | 0.60871  | -1.94062 | 0.28693  |
| N | -0.94455 | -1.22426 | -1.92586 |
| N | 1.79653  | -0.60168 | -2.47592 |
| N | 2.61232  | 0.62976  | -0.2286  |
| C | 1.29426  | -2.27186 | 1.37338  |
| C | 1.30779  | -3.56909 | 1.94761  |
| C | 0.5297   | -4.54692 | 1.38877  |
| H | 0.49527  | -5.55743 | 1.79843  |
| C | -0.3026  | -4.21716 | 0.29257  |
| C | -1.2456  | -5.13208 | -0.22394 |
| H | -1.28336 | -6.13901 | 0.19034  |
| C | -2.12809 | -4.73703 | -1.19962 |
| H | -2.89056 | -5.42044 | -1.56603 |
| C | -2.05203 | -3.43919 | -1.73271 |
| H | -2.77923 | -3.14073 | -2.48264 |
| C | -1.07908 | -2.54272 | -1.32717 |
| C | -0.22101 | -2.89657 | -0.25347 |
| C | -2.2215  | -0.48513 | -1.84695 |
| H | -2.07109 | 0.52785  | -2.23479 |

|    |          |          |          |
|----|----------|----------|----------|
| H  | -2.53439 | -0.429   | -0.7982  |
| H  | -3.03222 | -0.96578 | -2.41165 |
| C  | -0.42045 | -1.24678 | -3.34431 |
| H  | -0.5456  | -0.20313 | -3.6786  |
| C  | -1.19153 | -2.14428 | -4.31346 |
| H  | -1.12954 | -3.18441 | -3.96758 |
| H  | -2.25421 | -1.86757 | -4.30819 |
| C  | -0.62907 | -2.09433 | -5.72703 |
| H  | -1.22397 | -2.7432  | -6.37911 |
| H  | -0.71548 | -1.07743 | -6.13953 |
| C  | 0.82916  | -2.52044 | -5.71018 |
| H  | 1.25978  | -2.4967  | -6.71728 |
| H  | 0.91058  | -3.56126 | -5.36154 |
| C  | 1.61563  | -1.59    | -4.79988 |
| H  | 1.53821  | -0.57823 | -5.22099 |
| H  | 2.68448  | -1.83435 | -4.80314 |
| C  | 1.07865  | -1.57215 | -3.36193 |
| H  | 1.22027  | -2.56222 | -2.89855 |
| C  | 2.03828  | 0.69926  | -3.15641 |
| H  | 2.84485  | 0.62651  | -3.89495 |
| H  | 2.31032  | 1.45152  | -2.41242 |
| H  | 1.12106  | 1.01881  | -3.66072 |
| C  | 3.48103  | -0.28709 | -0.76721 |
| C  | 3.02775  | -1.05886 | -1.87242 |
| C  | 3.79062  | -2.12268 | -2.30854 |
| H  | 3.45298  | -2.74866 | -3.13004 |
| C  | 5.04227  | -2.39371 | -1.71634 |
| H  | 5.6246   | -3.23539 | -2.08276 |
| C  | 5.55333  | -1.57767 | -0.7348  |
| H  | 6.5464   | -1.75396 | -0.32629 |
| C  | 4.78656  | -0.49752 | -0.23991 |
| C  | 5.2385   | 0.38099  | 0.77869  |
| H  | 6.24084  | 0.25365  | 1.18793  |
| C  | 4.39716  | 1.36664  | 1.23061  |
| C  | 3.07381  | 1.42592  | 0.72199  |
| C  | 2.13236  | -1.34371 | 2.20128  |
| H  | 1.67923  | -0.34924 | 2.29878  |
| H  | 3.11445  | -1.20053 | 1.72611  |
| C  | 2.28493  | -2.09722 | 3.53066  |
| H  | 3.20749  | -1.84269 | 4.05999  |
| H  | 1.45096  | -1.84085 | 4.19735  |
| C  | 2.19928  | -3.58415 | 3.15183  |
| H  | 3.19085  | -3.97806 | 2.8833   |
| H  | 1.82586  | -4.2196  | 3.96281  |
| C  | 2.28773  | 2.48732  | 1.4311   |
| H  | 1.26538  | 2.16905  | 1.67085  |
| H  | 2.19307  | 3.36922  | 0.77684  |
| C  | 3.14445  | 2.79165  | 2.67055  |
| H  | 2.8269   | 2.14592  | 3.4998   |
| H  | 3.04609  | 3.82512  | 3.01456  |
| C  | 4.5856   | 2.43144  | 2.26816  |
| H  | 5.09771  | 3.2971   | 1.8224   |
| H  | 5.20285  | 2.11199  | 3.11446  |
| Fe | 0.53462  | 0.02449  | -0.7376  |
| C  | -0.98718 | 2.50014  | 0.09533  |
| C  | -0.02512 | 3.08586  | -1.75683 |
| H  | 0.5389   | 2.99077  | -2.67439 |

|   |          |          |          |
|---|----------|----------|----------|
| C | -0.60186 | 4.21051  | -1.23624 |
| H | -0.63384 | 5.23496  | -1.57932 |
| N | -0.25665 | 2.02115  | -0.92489 |
| N | -1.19992 | 3.8353   | -0.05695 |
| C | -1.87844 | 4.75249  | 0.88686  |
| H | -1.56633 | 4.44112  | 1.89188  |
| C | -1.38471 | 1.63716  | 1.18704  |
| C | -2.2985  | 1.83265  | 2.15471  |
| H | -2.88797 | 2.74451  | 2.12522  |
| O | -0.63809 | 0.4696   | 1.11169  |
| C | -2.57168 | 0.87154  | 3.28512  |
| H | -1.71896 | 0.94399  | 3.98429  |
| C | -3.83079 | 1.2848   | 4.05129  |
| H | -4.72144 | 1.21003  | 3.41698  |
| H | -3.98646 | 0.63439  | 4.91663  |
| H | -3.75403 | 2.31717  | 4.41157  |
| H | -2.95971 | 4.58458  | 0.80316  |
| C | -1.5344  | 6.18677  | 0.6307   |
| C | -2.40595 | 7.00543  | -0.09091 |
| C | -0.32266 | 6.7097   | 1.09299  |
| C | -2.07136 | 8.33281  | -0.34601 |
| H | -3.35477 | 6.60405  | -0.4476  |
| C | 0.01185  | 8.03469  | 0.83782  |
| H | 0.3559   | 6.07388  | 1.66461  |
| C | -0.86282 | 8.84665  | 0.11686  |
| H | -2.75796 | 8.96742  | -0.90146 |
| H | 0.9506   | 8.43945  | 1.20909  |
| H | -0.60417 | 9.88498  | -0.07752 |
| C | -3.41807 | -2.53769 | 1.94099  |
| C | -3.55655 | -1.12759 | 1.86999  |
| C | -4.48504 | -0.58151 | 0.96892  |
| C | -5.23702 | -1.43881 | 0.17977  |
| C | -5.08556 | -2.83384 | 0.27254  |
| C | -4.17876 | -3.40329 | 1.15492  |
| C | -2.03359 | -1.64384 | 3.44932  |
| H | -4.62498 | 0.49772  | 0.90192  |
| H | -5.97382 | -1.02914 | -0.50783 |
| H | -5.70718 | -3.48014 | -0.3437  |
| H | -4.08155 | -4.48413 | 1.24178  |
| H | -1.33068 | -1.65743 | 4.27687  |
| N | -2.47115 | -2.82647 | 2.90535  |
| C | -2.19201 | -4.14613 | 3.4219   |
| H | -3.01198 | -4.50674 | 4.05426  |
| H | -2.05127 | -4.85062 | 2.59472  |
| H | -1.27409 | -4.11831 | 4.01611  |
| C | -2.65767 | -0.56936 | 2.84585  |
| H | -1.08991 | -0.23551 | 1.64272  |

---

**IntA<sub>6S</sub>**

|   |          |          |          |
|---|----------|----------|----------|
| N | 0.6099   | -2.08595 | 0.09325  |
| N | -0.92325 | -1.17124 | -2.09485 |
| N | 1.87082  | -0.55081 | -2.55592 |
| N | 2.5983   | 0.64126  | -0.2564  |
| C | 1.31128  | -2.52469 | 1.13133  |
| C | 1.13504  | -3.79085 | 1.73749  |
| C | 0.10568  | -4.58508 | 1.31202  |

|   |          |          |          |
|---|----------|----------|----------|
| H | -0.10568 | -5.54771 | 1.77862  |
| C | -0.73198 | -4.1252  | 0.26987  |
| C | -1.87633 | -4.84881 | -0.12562 |
| H | -2.09362 | -5.7958  | 0.36554  |
| C | -2.71396 | -4.34463 | -1.09045 |
| H | -3.61384 | -4.88201 | -1.37847 |
| C | -2.40083 | -3.13133 | -1.72478 |
| H | -3.07545 | -2.7583  | -2.49124 |
| C | -1.25822 | -2.41542 | -1.40958 |
| C | -0.42372 | -2.8757  | -0.35647 |
| C | -2.11846 | -0.31505 | -2.24648 |
| H | -1.79798 | 0.69008  | -2.54071 |
| H | -2.6453  | -0.26193 | -1.29038 |
| H | -2.81924 | -0.68909 | -3.00561 |
| C | -0.29642 | -1.36368 | -3.46217 |
| H | -0.45852 | -0.39337 | -3.95802 |
| C | -0.96909 | -2.44103 | -4.31562 |
| H | -0.85228 | -3.41511 | -3.81977 |
| H | -2.04789 | -2.24759 | -4.37118 |
| C | -0.38594 | -2.52682 | -5.71973 |
| H | -0.88325 | -3.33173 | -6.27191 |
| H | -0.59692 | -1.59791 | -6.27109 |
| C | 1.11555  | -2.74892 | -5.65869 |
| H | 1.54997  | -2.76927 | -6.66423 |
| H | 1.33475  | -3.72779 | -5.20516 |
| C | 1.75713  | -1.63706 | -4.84309 |
| H | 1.52147  | -0.67987 | -5.33191 |
| H | 2.84974  | -1.7129  | -4.85146 |
| C | 1.21826  | -1.5943  | -3.40538 |
| H | 1.41153  | -2.55196 | -2.89514 |
| C | 2.00924  | 0.75186  | -3.25501 |
| H | 2.74402  | 0.70484  | -4.06725 |
| H | 2.33818  | 1.50073  | -2.53068 |
| H | 1.03824  | 1.05741  | -3.66004 |
| C | 3.5509   | -0.14266 | -0.85707 |
| C | 3.15083  | -0.9116  | -1.9826  |
| C | 3.99672  | -1.89775 | -2.4495  |
| H | 3.69832  | -2.54696 | -3.26709 |
| C | 5.28019  | -2.06707 | -1.88854 |
| H | 5.92768  | -2.84388 | -2.28745 |
| C | 5.73209  | -1.23947 | -0.88794 |
| H | 6.74012  | -1.34397 | -0.49158 |
| C | 4.87129  | -0.26284 | -0.33756 |
| C | 5.22785  | 0.55716  | 0.76337  |
| H | 6.23643  | 0.49226  | 1.17192  |
| C | 4.27996  | 1.38042  | 1.31717  |
| C | 2.96203  | 1.35772  | 0.79436  |
| C | 2.3841   | -1.75824 | 1.84296  |
| H | 2.05763  | -0.7332  | 2.06857  |
| H | 3.2794   | -1.68044 | 1.20926  |
| C | 2.65882  | -2.58108 | 3.11202  |
| H | 3.71228  | -2.56117 | 3.40609  |
| H | 2.07678  | -2.1614  | 3.93944  |
| C | 2.14939  | -4.00116 | 2.81659  |
| H | 2.95876  | -4.64918 | 2.44983  |
| H | 1.73239  | -4.49671 | 3.70128  |
| C | 2.04582  | 2.19034  | 1.64183  |

|    |          |          |          |
|----|----------|----------|----------|
| H  | 1.07367  | 1.705    | 1.81791  |
| H  | 1.84204  | 3.15081  | 1.14078  |
| C  | 2.85961  | 2.38468  | 2.93142  |
| H  | 2.63697  | 1.55359  | 3.61602  |
| H  | 2.61883  | 3.31408  | 3.45727  |
| C  | 4.33328  | 2.30068  | 2.4989   |
| H  | 4.71023  | 3.28731  | 2.19116  |
| H  | 4.99824  | 1.9498   | 3.29501  |
| Fe | 0.59264  | -0.09552 | -0.76472 |
| C  | -0.99472 | 2.37129  | -0.07565 |
| C  | 0.24697  | 3.1909   | -1.63824 |
| H  | 0.96265  | 3.23105  | -2.44913 |
| C  | -0.46321 | 4.24248  | -1.09233 |
| H  | -0.46499 | 5.30207  | -1.31192 |
| N  | -0.07732 | 2.0394   | -1.00635 |
| N  | -1.2423  | 3.72189  | -0.10789 |
| C  | -2.15095 | 4.52931  | 0.74875  |
| H  | -2.14894 | 4.05975  | 1.73671  |
| C  | -1.52679 | 1.31633  | 0.76296  |
| C  | -2.6318  | 1.48113  | 1.73725  |
| H  | -3.32444 | 2.27503  | 1.43689  |
| O  | -0.97653 | 0.19673  | 0.65155  |
| C  | -2.11973 | 1.76764  | 3.17955  |
| H  | -1.53022 | 2.70292  | 3.14526  |
| C  | -3.34007 | 2.01178  | 4.07022  |
| H  | -3.95571 | 1.1075   | 4.14218  |
| H  | -3.02772 | 2.27921  | 5.08399  |
| H  | -3.9699  | 2.82159  | 3.68067  |
| H  | -3.16256 | 4.44453  | 0.33315  |
| C  | -1.71261 | 5.95785  | 0.84313  |
| C  | -2.3821  | 6.95616  | 0.13299  |
| C  | -0.61373 | 6.29588  | 1.6405   |
| C  | -1.96033 | 8.28057  | 0.22221  |
| H  | -3.24367 | 6.69794  | -0.48284 |
| C  | -0.1918  | 7.61693  | 1.72723  |
| H  | -0.09505 | 5.51565  | 2.20242  |
| C  | -0.866   | 8.61024  | 1.01692  |
| H  | -2.49153 | 9.05598  | -0.32444 |
| H  | 0.65659  | 7.87777  | 2.35585  |
| H  | -0.54024 | 9.64522  | 1.09005  |
| C  | -0.39852 | -1.22184 | 4.67248  |
| C  | -1.42613 | -0.71405 | 3.83204  |
| C  | -2.36346 | -1.62304 | 3.31279  |
| C  | -2.26855 | -2.96537 | 3.64543  |
| C  | -1.25568 | -3.43554 | 4.49858  |
| C  | -0.30753 | -2.57002 | 5.0247   |
| C  | -0.10924 | 0.98261  | 4.5019   |
| H  | -3.1826  | -1.28862 | 2.67752  |
| H  | -3.00467 | -3.66591 | 3.25574  |
| H  | -1.22474 | -4.49012 | 4.76622  |
| H  | 0.46705  | -2.92677 | 5.70317  |
| H  | 0.34354  | 1.9419   | 4.73559  |
| N  | 0.40349  | -0.16598 | 5.05652  |
| C  | 1.45582  | -0.23403 | 6.04352  |
| H  | 1.07037  | -0.60357 | 7.00075  |
| H  | 2.26757  | -0.89593 | 5.71602  |
| H  | 1.86711  | 0.76611  | 6.19956  |

|   |          |         |         |
|---|----------|---------|---------|
| C | -1.22433 | 0.70828 | 3.7432  |
| H | -3.19876 | 0.54404 | 1.75123 |

---

**IntA<sub>6R</sub>**

|   |          |          |          |
|---|----------|----------|----------|
| N | 0.60614  | -2.0866  | 0.09796  |
| N | -0.92744 | -1.17441 | -2.09102 |
| N | 1.86687  | -0.55788 | -2.55642 |
| N | 2.59968  | 0.63468  | -0.25893 |
| C | 1.30689  | -2.5234  | 1.1373   |
| C | 1.13052  | -3.78852 | 1.74551  |
| C | 0.10179  | -4.58382 | 1.32044  |
| H | -0.10952 | -5.54584 | 1.78831  |
| C | -0.73539 | -4.12578 | 0.27709  |
| C | -1.87932 | -4.85034 | -0.11788 |
| H | -2.09654 | -5.7967  | 0.37452  |
| C | -2.71673 | -4.34774 | -1.08371 |
| H | -3.61636 | -4.88577 | -1.37129 |
| C | -2.40388 | -3.13509 | -1.71941 |
| H | -3.07867 | -2.7631  | -2.48622 |
| C | -1.26157 | -2.41839 | -1.40489 |
| C | -0.42721 | -2.87712 | -0.35097 |
| C | -2.1228  | -0.31791 | -2.23994 |
| H | -1.80287 | 0.68691  | -2.5358  |
| H | -2.64672 | -0.26394 | -1.2823  |
| H | -2.8259  | -0.69229 | -2.99673 |
| C | -0.30315 | -1.3669  | -3.45949 |
| H | -0.4642  | -0.39585 | -3.95428 |
| C | -0.97903 | -2.44239 | -4.31281 |
| H | -0.86372 | -3.41696 | -3.81757 |
| H | -2.05745 | -2.24664 | -4.36727 |
| C | -0.39752 | -2.52894 | -5.71754 |
| H | -0.89738 | -3.33236 | -6.26959 |
| H | -0.60671 | -1.59926 | -6.26828 |
| C | 1.10345  | -2.75483 | -5.658   |
| H | 1.53684  | -2.77618 | -6.66397 |
| H | 1.32063  | -3.7343  | -5.20479 |
| C | 1.7485   | -1.6446  | -4.843   |
| H | 1.5148   | -0.68689 | -5.33173 |
| H | 2.84092  | -1.72313 | -4.85233 |
| C | 1.21117  | -1.60038 | -3.40477 |
| H | 1.40319  | -2.55828 | -2.8945  |
| C | 2.00796  | 0.74399  | -3.25651 |
| H | 2.74244  | 0.69475  | -4.0689  |
| H | 2.33867  | 1.49263  | -2.53277 |
| H | 1.03752  | 1.05133  | -3.66152 |
| C | 3.54961  | -0.15262 | -0.85954 |
| C | 3.14656  | -0.92143 | -1.98412 |
| C | 3.98952  | -1.91001 | -2.45113 |
| H | 3.68871  | -2.55894 | -3.26807 |
| C | 5.27301  | -2.08235 | -1.89113 |
| H | 5.91813  | -2.86111 | -2.29009 |
| C | 5.72781  | -1.25545 | -0.89128 |
| H | 6.7358   | -1.36244 | -0.49551 |
| C | 4.87002  | -0.27621 | -0.34086 |
| C | 5.22955  | 0.54307  | 0.75965  |
| H | 6.23807  | 0.47518  | 1.16784  |
| C | 4.28433  | 1.36918  | 1.31371  |



|    |          |          |          |
|----|----------|----------|----------|
| C  | 2.96618  | 1.35054  | 0.79126  |
| C  | 2.37871  | -1.7552  | 1.84847  |
| H  | 2.05108  | -0.73015 | 2.07234  |
| H  | 3.27437  | -1.6774  | 1.21529  |
| C  | 2.65331  | -2.57603 | 3.1189   |
| H  | 3.70672  | -2.55545 | 3.41313  |
| H  | 2.07103  | -2.15505 | 3.94546  |
| C  | 2.14422  | -3.99671 | 2.82565  |
| H  | 2.95389  | -4.64532 | 2.46061  |
| H  | 1.7267   | -4.49068 | 3.71099  |
| C  | 2.05313  | 2.18656  | 1.63881  |
| H  | 1.07865  | 1.70567  | 1.81408  |
| H  | 1.85437  | 3.14836  | 1.13835  |
| C  | 2.86737  | 2.37678  | 2.9287   |
| H  | 2.64217  | 1.54555  | 3.61232  |
| H  | 2.62947  | 3.30632  | 3.4556   |
| C  | 4.34068  | 2.28876  | 2.49583  |
| H  | 4.72039  | 3.27448  | 2.18855  |
| H  | 5.00485  | 1.93549  | 3.29156  |
| Fe | 0.59166  | -0.09844 | -0.76418 |
| C  | -0.98989 | 2.37355  | -0.07931 |
| C  | 0.25123  | 3.18776  | -1.64509 |
| H  | 0.96587  | 3.22498  | -2.45705 |
| C  | -0.45652 | 4.2417   | -1.10051 |
| H  | -0.45679 | 5.3008   | -1.32238 |
| N  | -0.07415 | 2.03812  | -1.01038 |
| N  | -1.23528 | 3.72449  | -0.11406 |
| C  | -2.14135 | 4.53522  | 0.7422   |
| H  | -2.13943 | 4.06719  | 1.73089  |
| C  | -1.5232  | 1.32131  | 0.76179  |
| C  | -2.62779 | 1.48994  | 1.7359   |
| H  | -3.31885 | 2.28468  | 1.4341   |
| O  | -0.97493 | 0.20049  | 0.65247  |
| C  | -2.1155  | 1.7778   | 3.17783  |
| H  | -1.52412 | 2.71184  | 3.14211  |
| C  | -3.33561 | 2.02597  | 4.0677   |
| H  | -3.95313 | 1.12308  | 4.14095  |
| H  | -3.02304 | 2.29448  | 5.08112  |
| H  | -3.96361 | 2.83643  | 3.67654  |
| H  | -3.15356 | 4.45194  | 0.32771  |
| C  | -1.69993 | 5.96299  | 0.8339   |
| C  | -2.36843 | 6.96164  | 0.12333  |
| C  | -0.59928 | 6.29995  | 1.62929  |
| C  | -1.94394 | 8.28535  | 0.21015  |
| H  | -3.23133 | 6.70426  | -0.49098 |
| C  | -0.1746  | 7.62027  | 1.71358  |
| H  | -0.08139 | 5.51946  | 2.19158  |
| C  | -0.84785 | 8.61394  | 1.00287  |
| H  | -2.47439 | 9.06106  | -0.33681 |
| H  | 0.67516  | 7.88032  | 2.34067  |
| H  | -0.51995 | 9.64838  | 1.07415  |
| C  | -0.40104 | -1.21233 | 4.67722  |
| C  | -1.42703 | -0.70413 | 3.83505  |
| C  | -2.36525 | -1.61243 | 3.31618  |
| C  | -2.27273 | -2.95443 | 3.65083  |
| C  | -1.26152 | -3.42494 | 4.50576  |
| C  | -0.31255 | -2.56013 | 5.03154  |

|   |          |          |         |
|---|----------|----------|---------|
| C | -0.10727 | 0.99123  | 4.50256 |
| H | -3.18297 | -1.27773 | 2.67923 |
| H | -3.00942 | -3.65442 | 3.26122 |
| H | -1.23244 | -4.47918 | 4.77491 |
| H | 0.46082  | -2.91711 | 5.71126 |
| H | 0.34734  | 1.95004  | 4.73463 |
| N | 0.40273  | -0.15729 | 5.05984 |
| C | 1.4547   | -0.22543 | 6.04721 |
| H | 1.06797  | -0.59003 | 7.00582 |
| H | 2.26399  | -0.89151 | 5.72215 |
| H | 1.86961  | 0.77379  | 6.19947 |
| C | -1.22243 | 0.71765  | 3.74369 |
| H | -3.19667 | 0.55404  | 1.75129 |

---

**IntB<sub>1</sub>**

|   |         |          |          |
|---|---------|----------|----------|
| N | 4.17921 | -0.47736 | 3.13334  |
| N | 2.32887 | 0.5458   | 1.26631  |
| N | 4.90462 | 1.76621  | 0.74076  |
| N | 5.76435 | 2.49191  | 3.17822  |
| C | 5.00002 | -0.95682 | 4.05857  |
| C | 5.16863 | -2.33457 | 4.34135  |
| C | 4.40299 | -3.24188 | 3.65855  |
| H | 4.47148 | -4.31198 | 3.85468  |
| C | 3.45424 | -2.77507 | 2.7162   |
| C | 2.54561 | -3.65383 | 2.08885  |
| H | 2.61892 | -4.72022 | 2.29374  |
| C | 1.55838 | -3.15836 | 1.2723   |
| H | 0.82978 | -3.8257  | 0.81949  |
| C | 1.48294 | -1.77864 | 1.0174   |
| H | 0.67971 | -1.41293 | 0.3839   |
| C | 2.39969 | -0.8849  | 1.54629  |
| C | 3.37929 | -1.36897 | 2.45454  |
| C | 0.97024 | 1.0596   | 1.53901  |
| H | 0.98766 | 2.15245  | 1.47111  |
| H | 0.67107 | 0.76445  | 2.54896  |
| H | 0.2184  | 0.68201  | 0.83288  |
| C | 2.74192 | 0.93682  | -0.14012 |
| H | 2.41542 | 1.98691  | -0.21644 |
| C | 2.05564 | 0.13887  | -1.25162 |
| H | 2.32218 | -0.92146 | -1.14606 |
| H | 0.96585 | 0.20569  | -1.13811 |
| C | 2.46759 | 0.58927  | -2.64646 |
| H | 1.94613 | -0.01957 | -3.39325 |
| H | 2.15363 | 1.62963  | -2.82041 |
| C | 3.97427 | 0.47751  | -2.79895 |
| H | 4.29632 | 0.80605  | -3.79323 |
| H | 4.28459 | -0.57421 | -2.70281 |
| C | 4.64656 | 1.33122  | -1.73656 |
| H | 4.32538 | 2.37023  | -1.89366 |
| H | 5.7363  | 1.33593  | -1.8544  |
| C | 4.26489 | 0.9111   | -0.30968 |
| H | 4.61438 | -0.11568 | -0.11317 |
| C | 4.88694 | 3.21356  | 0.38417  |
| H | 5.60745 | 3.43477  | -0.41096 |
| H | 5.12762 | 3.80439  | 1.26909  |
| H | 3.88201 | 3.49533  | 0.05993  |

|    |          |          |          |
|----|----------|----------|----------|
| C  | 6.70194  | 1.91256  | 2.35894  |
| C  | 6.25044  | 1.38871  | 1.11826  |
| C  | 7.11315  | 0.61765  | 0.36472  |
| H  | 6.78869  | 0.16714  | -0.56873 |
| C  | 8.44843  | 0.42721  | 0.77792  |
| H  | 9.10623  | -0.17803 | 0.15945  |
| C  | 8.93524  | 1.03648  | 1.91048  |
| H  | 9.98145  | 0.93331  | 2.19168  |
| C  | 8.07159  | 1.79864  | 2.73058  |
| C  | 8.48478  | 2.43429  | 3.93065  |
| H  | 9.53118  | 2.37886  | 4.23091  |
| C  | 7.55292  | 3.09443  | 4.69208  |
| C  | 6.19211  | 3.06157  | 4.29181  |
| C  | 5.83736  | -0.13628 | 4.99254  |
| H  | 5.31167  | 0.76343  | 5.33797  |
| H  | 6.74884  | 0.20773  | 4.47843  |
| C  | 6.17854  | -1.12653 | 6.11541  |
| H  | 7.12552  | -0.89655 | 6.61157  |
| H  | 5.39412  | -1.09317 | 6.8823   |
| C  | 6.17269  | -2.50752 | 5.44043  |
| H  | 7.16013  | -2.74143 | 5.01563  |
| H  | 5.92883  | -3.32475 | 6.12696  |
| C  | 5.32685  | 3.73138  | 5.315    |
| H  | 4.39574  | 3.18148  | 5.50742  |
| H  | 5.03129  | 4.72551  | 4.94324  |
| C  | 6.24696  | 3.8318   | 6.54302  |
| H  | 6.11564  | 2.93932  | 7.16864  |
| H  | 6.02608  | 4.6987   | 7.17118  |
| C  | 7.67884  | 3.85105  | 5.97899  |
| H  | 8.00609  | 4.88094  | 5.77327  |
| H  | 8.41808  | 3.42548  | 6.66573  |
| Fe | 3.80603  | 1.59282  | 2.67502  |
| C  | 1.72194  | 2.80976  | 4.41059  |
| C  | 1.93899  | 0.84786  | 5.30898  |
| H  | 2.34012  | -0.14395 | 5.47972  |
| C  | 0.89639  | 1.47724  | 5.95463  |
| H  | 0.24026  | 1.15445  | 6.75161  |
| N  | 2.4392   | 1.67227  | 4.35677  |
| N  | 0.76369  | 2.71051  | 5.38458  |
| C  | -0.27799 | 3.70674  | 5.76203  |
| H  | -0.71256 | 4.07064  | 4.82431  |
| C  | 2.0612   | 3.86016  | 3.45774  |
| C  | 1.51971  | 5.19843  | 3.51904  |
| H  | 0.87512  | 5.46656  | 4.35248  |
| O  | 2.90229  | 3.52035  | 2.57974  |
| C  | 1.81961  | 6.13163  | 2.58751  |
| H  | 2.47474  | 5.82917  | 1.76675  |
| C  | 1.33193  | 7.52294  | 2.58814  |
| H  | 0.69025  | 7.74998  | 3.44426  |
| H  | 2.17468  | 8.22751  | 2.58483  |
| H  | 0.77501  | 7.73806  | 1.66607  |
| H  | 0.23597  | 4.54373  | 6.24991  |
| C  | -1.32835 | 3.12774  | 6.65637  |
| C  | -1.24976 | 3.29958  | 8.04075  |
| C  | -2.38717 | 2.39394  | 6.1113   |
| C  | -2.21995 | 2.74611  | 8.87138  |
| H  | -0.43122 | 3.87861  | 8.46924  |

|   |          |         |         |
|---|----------|---------|---------|
| C | -3.35462 | 1.83967 | 6.9417  |
| H | -2.45783 | 2.26649 | 5.03042 |
| C | -3.27076 | 2.01532 | 8.32219 |
| H | -2.15959 | 2.8924  | 9.94722 |
| H | -4.18212 | 1.27986 | 6.51195 |
| H | -4.03218 | 1.58862 | 8.97103 |

---

**TSB<sub>2s</sub>**


---

|   |         |          |          |
|---|---------|----------|----------|
| N | 3.94681 | -0.60615 | 2.86925  |
| N | 2.6891  | 0.61779  | 0.68773  |
| N | 5.40632 | 1.54579  | 0.87804  |
| N | 5.69203 | 2.14588  | 3.49644  |
| C | 4.44971 | -1.18118 | 3.9527   |
| C | 4.39402 | -2.57269 | 4.22592  |
| C | 3.73291 | -3.38997 | 3.35012  |
| H | 3.64166 | -4.46265 | 3.52179  |
| C | 3.09363 | -2.81373 | 2.22624  |
| C | 2.27184 | -3.58093 | 1.37322  |
| H | 2.18303 | -4.65084 | 1.55305  |
| C | 1.56135 | -2.97373 | 0.36659  |
| H | 0.89577 | -3.55374 | -0.26754 |
| C | 1.68924 | -1.59093 | 0.15461  |
| H | 1.0976  | -1.12816 | -0.63079 |
| C | 2.54403 | -0.81159 | 0.91547  |
| C | 3.23589 | -1.40559 | 2.00436  |
| C | 1.37064 | 1.27997  | 0.6673   |
| H | 1.52335 | 2.3653   | 0.65411  |
| H | 0.82552 | 1.01408  | 1.57726  |
| H | 0.76088 | 1.00149  | -0.2038  |
| C | 3.47046 | 0.97848  | -0.55215 |
| H | 3.28193 | 2.05909  | -0.66853 |
| C | 3.00783 | 0.27898  | -1.8321  |
| H | 3.13307 | -0.80558 | -1.71286 |
| H | 1.93553 | 0.45916  | -1.98628 |
| C | 3.79815 | 0.71058  | -3.05917 |
| H | 3.42698 | 0.17479  | -3.94005 |
| H | 3.64004 | 1.78199  | -3.25796 |
| C | 5.27782 | 0.44583  | -2.8384  |
| H | 5.86821 | 0.75535  | -3.70801 |
| H | 5.44925 | -0.63449 | -2.71472 |
| C | 5.7449  | 1.201    | -1.60447 |
| H | 5.5759  | 2.27197  | -1.78645 |
| H | 6.82467 | 1.09141  | -1.45085 |
| C | 4.97885 | 0.79282  | -0.3383  |
| H | 5.16426 | -0.27026 | -0.11327 |
| C | 5.56434 | 3.00156  | 0.61353  |
| H | 6.46952 | 3.20992  | 0.02997  |
| H | 5.61125 | 3.54049  | 1.56191  |
| H | 4.68778 | 3.36448  | 0.06857  |
| C | 6.747   | 1.50444  | 2.89617  |
| C | 6.5742  | 1.04588  | 1.56024  |
| C | 7.52297 | 0.20387  | 1.01407  |
| H | 7.397   | -0.20033 | 0.0137   |
| C | 8.69136 | -0.12486 | 1.73258  |
| H | 9.42177 | -0.78604 | 1.27294  |
| C | 8.93783 | 0.42184  | 2.96938  |
| H | 9.86796 | 0.21405  | 3.49498  |

|    |          |          |          |
|----|----------|----------|----------|
| C  | 7.97145  | 1.25318  | 3.5809   |
| C  | 8.14048  | 1.82364  | 4.86857  |
| H  | 9.07391  | 1.65765  | 5.40698  |
| C  | 7.11485  | 2.55435  | 5.41336  |
| C  | 5.89241  | 2.65186  | 4.70132  |
| C  | 5.09947  | -0.46802 | 5.10073  |
| H  | 4.59064  | 0.47593  | 5.33194  |
| H  | 6.14276  | -0.21817 | 4.85387  |
| C  | 5.03829  | -1.49848 | 6.23685  |
| H  | 5.84272  | -1.37481 | 6.96765  |
| H  | 4.08898  | -1.38947 | 6.77821  |
| C  | 5.0678   | -2.86348 | 5.53219  |
| H  | 6.10337  | -3.19202 | 5.35818  |
| H  | 4.581    | -3.65992 | 6.10461  |
| C  | 4.85991  | 3.36015  | 5.52611  |
| H  | 3.87505  | 2.87827  | 5.46471  |
| H  | 4.72765  | 4.387    | 5.1487   |
| C  | 5.46498  | 3.34219  | 6.93883  |
| H  | 5.12062  | 2.44377  | 7.46836  |
| H  | 5.16947  | 4.20477  | 7.54283  |
| C  | 6.98757  | 3.25651  | 6.73091  |
| H  | 7.43185  | 4.26063  | 6.6634   |
| H  | 7.50587  | 2.74521  | 7.54909  |
| Fe | 3.79799  | 1.57894  | 2.44975  |
| C  | 1.65501  | 2.83192  | 4.06207  |
| C  | 1.59975  | 0.81913  | 4.8636   |
| H  | 1.81329  | -0.24102 | 4.93517  |
| C  | 0.80481  | 1.59206  | 5.67357  |
| H  | 0.227    | 1.36051  | 6.5575   |
| N  | 2.12855  | 1.59364  | 3.87693  |
| N  | 0.8513   | 2.86646  | 5.166    |
| C  | 0.22485  | 4.05227  | 5.79201  |
| H  | -0.65798 | 4.32369  | 5.19913  |
| C  | 2.12543  | 3.89253  | 3.16377  |
| C  | 1.59198  | 5.17823  | 3.1211   |
| O  | 3.09156  | 3.53082  | 2.38492  |
| C  | 2.19938  | 6.19269  | 2.33903  |
| H  | 3.2698   | 6.0474   | 2.17266  |
| C  | 1.77134  | 7.61371  | 2.51842  |
| H  | 0.68235  | 7.71061  | 2.59689  |
| H  | 2.19828  | 8.00434  | 3.45127  |
| H  | 2.12837  | 8.2633   | 1.71202  |
| H  | 0.95485  | 4.86572  | 5.69922  |
| C  | -0.13994 | 3.81347  | 7.22468  |
| C  | 0.84505  | 3.87739  | 8.2154   |
| C  | -1.45223 | 3.49618  | 7.58089  |
| C  | 0.52086  | 3.62999  | 9.5442   |
| H  | 1.87067  | 4.12777  | 7.93782  |
| C  | -1.77766 | 3.24791  | 8.91184  |
| H  | -2.22411 | 3.4475   | 6.81234  |
| C  | -0.79181 | 3.31457  | 9.89301  |
| H  | 1.28885  | 3.69295  | 10.31198 |
| H  | -2.80309 | 3.00818  | 9.1831   |
| H  | -1.04682 | 3.12615  | 10.93338 |
| C  | 1.83064  | 7.66658  | -0.92871 |
| C  | 2.71941  | 6.71703  | -0.38909 |
| C  | 4.09045  | 6.89448  | -0.57566 |

|   |          |         |          |
|---|----------|---------|----------|
| C | 4.52547  | 7.99629 | -1.30493 |
| C | 3.61806  | 8.92425 | -1.83508 |
| C | 2.24708  | 8.77856 | -1.65093 |
| C | 0.58113  | 6.13632 | 0.12191  |
| H | 4.80731  | 6.18806 | -0.15909 |
| H | 5.59017  | 8.14597 | -1.46759 |
| H | 3.99129  | 9.77598 | -2.39792 |
| H | 1.54338  | 9.50314 | -2.05474 |
| H | -0.33263 | 5.68246 | 0.49142  |
| H | 0.65514  | 5.39901 | 3.62722  |
| N | 0.52899  | 7.27301 | -0.58456 |
| C | -0.66125 | 8.03349 | -0.91172 |
| H | -0.61879 | 9.01986 | -0.438   |
| H | -0.7342  | 8.16216 | -1.99577 |
| H | -1.54318 | 7.49942 | -0.5547  |
| C | 1.92289  | 5.7589  | 0.36262  |
| H | 2.2263   | 4.72774 | 0.53023  |

---

**TSB<sub>2R</sub>**

|   |          |          |          |
|---|----------|----------|----------|
| N | 4.06114  | -0.61738 | 3.07205  |
| N | 2.51198  | 0.22077  | 0.8885   |
| N | 5.27818  | 0.95631  | 0.5324   |
| N | 5.89504  | 2.26604  | 2.80996  |
| C | 4.76658  | -1.02428 | 4.11967  |
| C | 4.59921  | -2.27764 | 4.7665   |
| C | 3.60451  | -3.11325 | 4.33932  |
| H | 3.41178  | -4.07104 | 4.82318  |
| C | 2.77351  | -2.69829 | 3.27211  |
| C | 1.65866  | -3.46413 | 2.86999  |
| H | 1.46707  | -4.41286 | 3.36821  |
| C | 0.81686  | -2.99863 | 1.88939  |
| H | -0.05918 | -3.5708  | 1.59501  |
| C | 1.09416  | -1.7791  | 1.25052  |
| H | 0.41911  | -1.4354  | 0.4705   |
| C | 2.20661  | -1.02173 | 1.57529  |
| C | 3.05183  | -1.447   | 2.63406  |
| C | 1.29783  | 1.03926  | 0.69531  |
| H | 1.59817  | 2.04292  | 0.37688  |
| H | 0.76195  | 1.11249  | 1.64613  |
| H | 0.61554  | 0.62338  | -0.05964 |
| C | 3.19286  | 0.03447  | -0.44901 |
| H | 3.00343  | 0.98589  | -0.97029 |
| C | 2.60624  | -1.08937 | -1.305   |
| H | 2.7527   | -2.04889 | -0.78876 |
| H | 1.52122  | -0.95086 | -1.40049 |
| C | 3.2475   | -1.16864 | -2.68409 |
| H | 2.81351  | -2.00624 | -3.24147 |
| H | 3.01307  | -0.25997 | -3.25947 |
| C | 4.75563  | -1.3141  | -2.56156 |
| H | 5.22873  | -1.33159 | -3.54975 |
| H | 5.00301  | -2.27367 | -2.0815  |
| C | 5.31345  | -0.16128 | -1.74075 |
| H | 5.05943  | 0.77827  | -2.25415 |
| H | 6.4079   | -0.19107 | -1.69918 |
| C | 4.71357  | -0.12171 | -0.32811 |
| H | 4.92769  | -1.06473 | 0.20037  |
| C | 5.35034  | 2.26492  | -0.16904 |

|    |         |          |          |          |
|----|---------|----------|----------|----------|
| H  |         | 6.1263   | 2.26686  | -0.94389 |
| H  |         | 5.56553  | 3.05056  | 0.55852  |
| H  |         | 4.3788   | 2.48764  | -0.62206 |
| C  |         | 6.88339  | 1.48164  | 2.27311  |
| C  |         | 6.54274  | 0.66292  | 1.16106  |
| C  |         | 7.42711  | -0.322   | 0.76622  |
| H  |         | 7.17705  | -1.00704 | -0.03839 |
| C  |         | 8.69074  | -0.44231 | 1.38123  |
| H  |         | 9.36778  | -1.22098 | 1.03853  |
| C  |         | 9.09091  | 0.43777  | 2.35865  |
| H  |         | 10.08782 | 0.37474  | 2.79072  |
| C  |         | 8.19242  | 1.42069  | 2.83428  |
| C  |         | 8.50346  | 2.31174  | 3.89326  |
| H  |         | 9.50048  | 2.28857  | 4.33367  |
| C  |         | 7.52988  | 3.16121  | 4.35648  |
| C  |         | 6.22802  | 3.07276  | 3.80175  |
| C  |         | 5.81893  | -0.23186 | 4.83601  |
| H  |         | 5.55292  | 0.8277   | 4.92383  |
| H  |         | 6.76536  | -0.27949 | 4.27577  |
| C  |         | 5.94626  | -0.94722 | 6.18845  |
| H  |         | 6.93819  | -0.83822 | 6.63589  |
| H  |         | 5.22247  | -0.52136 | 6.89595  |
| C  |         | 5.57327  | -2.40721 | 5.89662  |
| H  |         | 6.45482  | -2.97894 | 5.5702   |
| H  |         | 5.16467  | -2.93552 | 6.76461  |
| C  |         | 5.28651  | 3.98585  | 4.5221   |
| H  |         | 4.3029   | 3.52699  | 4.68938  |
| H  |         | 5.1129   | 4.88462  | 3.90831  |
| C  |         | 6.04772  | 4.32952  | 5.8112   |
| H  |         | 5.79109  | 3.59952  | 6.58992  |
| H  |         | 5.79828  | 5.32061  | 6.20272  |
| C  |         | 7.53825  | 4.18541  | 5.45135  |
| H  |         | 7.94314  | 5.1353   | 5.07139  |
| H  |         | 8.16234  | 3.90503  | 6.30656  |
| Fe | 3.89512 |          | 1.46536  | 2.22611  |
| C  |         | 1.78828  | 2.95114  | 3.70657  |
| C  |         | 1.94201  | 1.17589  | 4.94124  |
| H  |         | 2.29621  | 0.2058   | 5.26962  |
| C  |         | 0.97508  | 1.97152  | 5.50639  |
| H  |         | 0.35341  | 1.84553  | 6.38185  |
| N  |         | 2.4403   | 1.7883   | 3.83502  |
| N  |         | 0.88189  | 3.093    | 4.72205  |
| C  |         | -0.04435 | 4.22535  | 4.95645  |
| H  |         | -0.68511 | 4.30629  | 4.06999  |
| C  |         | 2.15302  | 3.81345  | 2.57658  |
| C  |         | 1.54127  | 5.02931  | 2.28716  |
| H  |         | 0.80794  | 5.45362  | 2.9643   |
| O  |         | 3.12735  | 3.35831  | 1.85898  |
| C  |         | 1.97886  | 5.82874  | 1.20202  |
| H  |         | 2.43705  | 5.27756  | 0.37881  |
| C  |         | 1.16021  | 7.0216   | 0.82133  |
| H  |         | 0.17793  | 6.6904   | 0.46109  |
| H  |         | 0.98028  | 7.67873  | 1.68136  |
| H  |         | 1.61811  | 7.61105  | 0.02117  |
| H  |         | 0.56863  | 5.13476  | 5.01012  |
| C  |         | -0.86245 | 4.06706  | 6.1993   |
| C  |         | -0.37365 | 4.528    | 7.42502  |

|   |          |          |          |
|---|----------|----------|----------|
| C | -2.11466 | 3.44866  | 6.14842  |
| C | -1.12665 | 4.3754   | 8.58441  |
| H | 0.60118  | 5.01671  | 7.4665   |
| C | -2.86905 | 3.29687  | 7.30769  |
| H | -2.50391 | 3.09359  | 5.1939   |
| C | -2.37544 | 3.75975  | 8.52546  |
| H | -0.74449 | 4.74502  | 9.53312  |
| H | -3.84776 | 2.82493  | 7.25907  |
| H | -2.96929 | 3.64838  | 9.42989  |
| C | 3.57648  | 8.6684   | 2.68543  |
| C | 3.49621  | 7.30676  | 3.03475  |
| C | 3.1006   | 6.96708  | 4.32911  |
| C | 2.80533  | 7.98928  | 5.22739  |
| C | 2.89301  | 9.33656  | 4.8522   |
| C | 3.27913  | 9.70131  | 3.5665   |
| C | 4.15394  | 7.50157  | 0.86753  |
| H | 3.03081  | 5.92263  | 4.63273  |
| H | 2.50501  | 7.74173  | 6.24358  |
| H | 2.65742  | 10.11144 | 5.57721  |
| H | 3.34157  | 10.747   | 3.27338  |
| H | 4.46926  | 7.35469  | -0.16037 |
| N | 3.98243  | 8.74206  | 1.34518  |
| C | 4.12991  | 9.97992  | 0.6051   |
| H | 3.15928  | 10.47706 | 0.50203  |
| H | 4.81833  | 10.6476  | 1.13144  |
| H | 4.53115  | 9.7642   | -0.38637 |
| C | 3.77689  | 6.53538  | 1.83042  |
| H | 4.2017   | 5.5316   | 1.82564  |

---

**IntB<sub>3S</sub>**

|   |          |          |          |
|---|----------|----------|----------|
| N | 0.49711  | -2.82524 | 0.1897   |
| N | -0.74964 | -1.60353 | -1.99624 |
| N | 1.97555  | -0.68902 | -1.79715 |
| N | 2.2601   | -0.08769 | 0.82305  |
| C | 0.98628  | -3.39777 | 1.28022  |
| C | 0.92016  | -4.78796 | 1.56016  |
| C | 0.26226  | -5.60609 | 0.68322  |
| H | 0.16362  | -6.67744 | 0.85924  |
| C | -0.36552 | -5.03117 | -0.44783 |
| C | -1.18631 | -5.79743 | -1.30259 |
| H | -1.28203 | -6.86608 | -1.11854 |
| C | -1.88839 | -5.19076 | -2.31548 |
| H | -2.55357 | -5.77006 | -2.95076 |
| C | -1.75324 | -3.80922 | -2.5309  |
| H | -2.33976 | -3.34517 | -3.31955 |
| C | -0.89872 | -3.03139 | -1.76825 |
| C | -0.21372 | -3.62481 | -0.6745  |
| C | -2.06445 | -0.93608 | -2.01516 |
| H | -1.90479 | 0.14859  | -2.01766 |
| H | -2.60947 | -1.20281 | -1.10547 |
| H | -2.67511 | -1.20848 | -2.88827 |
| C | 0.0376   | -1.24416 | -3.23009 |
| H | -0.14343 | -0.16178 | -3.34348 |
| C | -0.42501 | -1.93753 | -4.51376 |
| H | -0.30771 | -3.02306 | -4.39576 |
| H | -1.49605 | -1.751   | -4.67027 |
| C | 0.37211  | -1.51047 | -5.73774 |



|    |          |          |          |
|----|----------|----------|----------|
| H  | -0.00098 | -2.04047 | -6.62147 |
| H  | 0.22496  | -0.43674 | -5.93421 |
| C  | 1.84875  | -1.7887  | -5.51296 |
| H  | 2.44473  | -1.48438 | -6.38074 |
| H  | 2.00922  | -2.87073 | -5.3899  |
| C  | 2.31878  | -1.0397  | -4.27657 |
| H  | 2.16289  | 0.03344  | -4.45833 |
| H  | 3.39669  | -1.16129 | -4.11853 |
| C  | 1.54491  | -1.43916 | -3.0123  |
| H  | 1.72093  | -2.50347 | -2.78578 |
| C  | 2.14533  | 0.76502  | -2.05832 |
| H  | 3.06038  | 0.97066  | -2.62796 |
| H  | 2.17773  | 1.30265  | -1.10838 |
| H  | 1.27892  | 1.13274  | -2.61685 |
| C  | 3.30872  | -0.74202 | 0.22664  |
| C  | 3.13437  | -1.19998 | -1.10978 |
| C  | 4.07386  | -2.05664 | -1.65021 |
| H  | 3.94659  | -2.46129 | -2.65028 |
| C  | 5.23453  | -2.40084 | -0.92665 |
| H  | 5.95684  | -3.07381 | -1.38203 |
| C  | 5.48431  | -1.85531 | 0.30995  |
| H  | 6.40897  | -2.07597 | 0.84003  |
| C  | 4.5276   | -1.00903 | 0.9159   |
| C  | 4.69959  | -0.44026 | 2.20404  |
| H  | 5.62811  | -0.62008 | 2.74657  |
| C  | 3.68168  | 0.30385  | 2.74479  |
| C  | 2.46327  | 0.4166   | 2.02782  |
| C  | 1.6282   | -2.6827  | 2.43128  |
| H  | 1.11961  | -1.73643 | 2.65285  |
| H  | 2.67476  | -2.43863 | 2.19331  |
| C  | 1.55202  | -3.70732 | 3.5716   |
| H  | 2.3511   | -3.58416 | 4.30846  |
| H  | 0.5989   | -3.59069 | 4.1045   |
| C  | 1.58054  | -5.07596 | 2.87379  |
| H  | 2.61594  | -5.41088 | 2.71084  |
| H  | 1.08425  | -5.86711 | 3.44551  |
| C  | 1.43481  | 1.13258  | 2.84994  |
| H  | 0.44557  | 0.66179  | 2.77772  |
| H  | 1.31492  | 2.16275  | 2.47726  |
| C  | 2.0324   | 1.10034  | 4.26539  |
| H  | 1.67856  | 0.20062  | 4.78666  |
| H  | 1.74098  | 1.9609   | 4.87437  |
| C  | 3.55536  | 1.00318  | 4.06407  |
| H  | 4.00758  | 2.0042   | 4.00172  |
| H  | 4.06635  | 0.48517  | 4.8827   |
| Fe | 0.35038  | -0.62749 | -0.22761 |
| C  | -1.76071 | 0.58658  | 1.4303   |
| C  | -1.84481 | -1.44537 | 2.18443  |
| H  | -1.65084 | -2.51103 | 2.22458  |
| C  | -2.61004 | -0.68132 | 3.02528  |
| H  | -3.18251 | -0.92358 | 3.90954  |
| N  | -1.31521 | -0.65419 | 1.20613  |
| N  | -2.54501 | 0.60805  | 2.54793  |
| C  | -3.13377 | 1.79109  | 3.20616  |
| H  | -3.98991 | 2.12665  | 2.60631  |
| C  | -1.27908 | 1.66582  | 0.55865  |
| C  | -1.71631 | 2.96252  | 0.58274  |

|   |          |         |          |
|---|----------|---------|----------|
| O | -0.34313 | 1.27946 | -0.2807  |
| C | -1.06755 | 3.981   | -0.27881 |
| H | 0.02425  | 3.84393 | -0.22399 |
| C | -1.43209 | 5.40892 | 0.08954  |
| H | -2.51714 | 5.57388 | 0.04917  |
| H | -1.11365 | 5.6288  | 1.11366  |
| H | -0.95255 | 6.14172 | -0.56931 |
| H | -2.36814 | 2.5762  | 3.16289  |
| C | -3.54138 | 1.51516 | 4.62083  |
| C | -2.57833 | 1.51048 | 5.63474  |
| C | -4.87051 | 1.22776 | 4.93734  |
| C | -2.93966 | 1.22358 | 6.94598  |
| H | -1.5395  | 1.73748 | 5.38876  |
| C | -5.23391 | 0.94123 | 6.25073  |
| H | -5.62574 | 1.23263 | 4.15086  |
| C | -4.26891 | 0.9378  | 7.25454  |
| H | -2.18701 | 1.23036 | 7.73148  |
| H | -6.2723  | 0.72471 | 6.49079  |
| H | -4.55295 | 0.71813 | 8.28118  |
| C | -1.55702 | 5.22587 | -3.58561 |
| C | -0.61328 | 4.56415 | -2.79297 |
| C | 0.73367  | 4.84307 | -2.97987 |
| C | 1.08836  | 5.7713  | -3.95983 |
| C | 0.12167  | 6.41543 | -4.73991 |
| C | -1.23479 | 6.15386 | -4.56493 |
| C | -2.73548 | 3.90756 | -2.2065  |
| H | 1.49736  | 4.35858 | -2.37321 |
| H | 2.13813  | 6.00491 | -4.1202  |
| H | 0.43261  | 7.13554 | -5.49214 |
| H | -1.99027 | 6.65719 | -5.1641  |
| H | -3.62115 | 3.48202 | -1.74302 |
| H | -2.55985 | 3.26582 | 1.19537  |
| N | -2.84223 | 4.78427 | -3.1788  |
| C | -4.07667 | 5.28734 | -3.76141 |
| H | -4.13273 | 6.36937 | -3.61172 |
| H | -4.08568 | 5.0728  | -4.83368 |
| H | -4.92927 | 4.80494 | -3.28248 |
| C | -1.33843 | 3.68294 | -1.83088 |
| H | -1.05387 | 2.61746 | -1.90544 |

---

**IntB<sub>3R</sub>**

|   |          |          |          |
|---|----------|----------|----------|
| N | 0.61891  | -2.90485 | 0.20085  |
| N | -1.01723 | -2.08113 | -1.91846 |
| N | 1.7203   | -1.27939 | -2.34889 |
| N | 2.35328  | 0.05269  | -0.09505 |
| C | 1.36563  | -3.30568 | 1.2205   |
| C | 1.23935  | -4.56412 | 1.86847  |
| C | 0.24255  | -5.41315 | 1.47305  |
| H | 0.08122  | -6.37575 | 1.95887  |
| C | -0.63208 | -5.00558 | 0.43787  |
| C | -1.75033 | -5.78423 | 0.07027  |
| H | -1.91137 | -6.73851 | 0.5688   |
| C | -2.63283 | -5.32484 | -0.87719 |
| H | -3.51048 | -5.90791 | -1.14427 |
| C | -2.39503 | -4.09789 | -1.51752 |
| H | -3.10059 | -3.7576  | -2.27156 |
| C | -1.28184 | -3.32864 | -1.22754 |

|    |          |          |          |
|----|----------|----------|----------|
| C  | -0.39336 | -3.74753 | -0.20295 |
| C  | -2.24964 | -1.28381 | -2.08096 |
| H  | -1.97191 | -0.26819 | -2.38151 |
| H  | -2.77304 | -1.23753 | -1.12137 |
| H  | -2.93398 | -1.70065 | -2.83395 |
| C  | -0.36599 | -2.257   | -3.27072 |
| H  | -0.59337 | -1.31497 | -3.79414 |
| C  | -0.94541 | -3.40023 | -4.10604 |
| H  | -0.7625  | -4.35278 | -3.5885  |
| H  | -2.03573 | -3.28952 | -4.17316 |
| C  | -0.33952 | -3.46991 | -5.50138 |
| H  | -0.7659  | -4.3213  | -6.0437  |
| H  | -0.61326 | -2.5704  | -6.07405 |
| C  | 1.17477  | -3.57439 | -5.42003 |
| H  | 1.6211   | -3.58449 | -6.42081 |
| H  | 1.46067  | -4.52442 | -4.94249 |
| C  | 1.72318  | -2.40314 | -4.61906 |
| H  | 1.42856  | -1.4732  | -5.12871 |
| H  | 2.81884  | -2.40228 | -4.60852 |
| C  | 1.16155  | -2.37369 | -3.19013 |
| H  | 1.41497  | -3.30865 | -2.66481 |
| C  | 1.72855  | 0.02978  | -3.04944 |
| H  | 2.47492  | 0.0573   | -3.85311 |
| H  | 1.94639  | 0.81982  | -2.32726 |
| H  | 0.73453  | 0.22536  | -3.46508 |
| C  | 3.35318  | -0.69815 | -0.65404 |
| C  | 3.0096   | -1.53102 | -1.75527 |
| C  | 3.91624  | -2.48723 | -2.16979 |
| H  | 3.66838  | -3.18444 | -2.96464 |
| C  | 5.19947  | -2.56037 | -1.58756 |
| H  | 5.89393  | -3.31624 | -1.94611 |
| C  | 5.59646  | -1.6624  | -0.62486 |
| H  | 6.60715  | -1.6887  | -0.22177 |
| C  | 4.67786  | -0.70881 | -0.12797 |
| C  | 4.98452  | 0.20402  | 0.91409  |
| H  | 5.99365  | 0.22243  | 1.32639  |
| C  | 3.99375  | 1.02437  | 1.3948   |
| C  | 2.68182  | 0.88183  | 0.87841  |
| C  | 2.43198  | -2.49968 | 1.89957  |
| H  | 2.15249  | -1.44461 | 2.00099  |
| H  | 3.35784  | -2.532   | 1.30525  |
| C  | 2.61996  | -3.21757 | 3.2436   |
| H  | 3.62617  | -3.09581 | 3.65467  |
| H  | 1.9165   | -2.80474 | 3.97866  |
| C  | 2.25761  | -4.6822  | 2.96047  |
| H  | 3.13473  | -5.23951 | 2.5986   |
| H  | 1.89094  | -5.21915 | 3.84178  |
| C  | 1.72355  | 1.76975  | 1.60686  |
| H  | 0.76887  | 1.26903  | 1.81578  |
| H  | 1.4815   | 2.64016  | 0.97464  |
| C  | 2.50907  | 2.18227  | 2.8608   |
| H  | 2.29271  | 1.47701  | 3.67328  |
| H  | 2.24104  | 3.18027  | 3.22234  |
| C  | 3.99596  | 2.0681   | 2.47154  |
| H  | 4.37133  | 3.02047  | 2.06793  |
| H  | 4.64315  | 1.81865  | 3.31934  |
| Fe | 0.36111  | -0.79331 | -0.61491 |

|   |          |          |          |
|---|----------|----------|----------|
| C | -1.76237 | 0.53383  | 0.94761  |
| C | -1.53456 | -1.282   | 2.11352  |
| H | -1.12125 | -2.23654 | 2.41713  |
| C | -2.58169 | -0.58944 | 2.66173  |
| H | -3.23489 | -0.80204 | 3.49585  |
| N | -1.03273 | -0.58275 | 1.05526  |
| N | -2.72325 | 0.5593   | 1.91869  |
| C | -3.74951 | 1.59955  | 2.13915  |
| H | -4.28093 | 1.73199  | 1.18833  |
| C | -1.44215 | 1.46261  | -0.14377 |
| C | -2.07119 | 2.65605  | -0.37793 |
| H | -2.82002 | 3.04776  | 0.30217  |
| O | -0.45706 | 1.05056  | -0.91042 |
| C | -1.66126 | 3.5089   | -1.516   |
| H | -1.55581 | 2.88803  | -2.41878 |
| C | -2.61898 | 4.65882  | -1.77299 |
| H | -3.62687 | 4.2766   | -1.96426 |
| H | -2.68196 | 5.32938  | -0.90673 |
| H | -2.32636 | 5.25937  | -2.64334 |
| H | -3.22318 | 2.53877  | 2.35772  |
| C | -4.69944 | 1.25141  | 3.24322  |
| C | -4.41967 | 1.62568  | 4.56023  |
| C | -5.85523 | 0.5147   | 2.97079  |
| C | -5.28285 | 1.26827  | 5.59117  |
| H | -3.51994 | 2.20254  | 4.77743  |
| C | -6.71933 | 0.1575   | 4.00087  |
| H | -6.08013 | 0.2241   | 1.94422  |
| C | -6.43245 | 0.53248  | 5.31172  |
| H | -5.06169 | 1.56838  | 6.61297  |
| H | -7.62096 | -0.40928 | 3.77984  |
| H | -7.10982 | 0.25667  | 6.11694  |
| C | 0.47627  | 6.19571  | -0.60166 |
| C | 0.01259  | 4.96819  | -0.11425 |
| C | -0.23034 | 4.84186  | 1.24881  |
| C | 0.00486  | 5.9448   | 2.07174  |
| C | 0.47314  | 7.15697  | 1.55445  |
| C | 0.71791  | 7.30748  | 0.19193  |
| C | 0.3167   | 4.85426  | -2.38784 |
| H | -0.59872 | 3.9042   | 1.66182  |
| H | -0.18144 | 5.86329  | 3.14021  |
| H | 0.64618  | 7.99608  | 2.22313  |
| H | 1.07795  | 8.2488   | -0.21689 |
| H | 0.35772  | 4.58156  | -3.43852 |
| N | 0.63542  | 6.07071  | -2.00448 |
| C | 1.06332  | 7.16706  | -2.85877 |
| H | 0.35168  | 7.99329  | -2.77132 |
| H | 2.05236  | 7.51035  | -2.54258 |
| H | 1.10613  | 6.8281   | -3.89424 |
| C | -0.15593 | 4.03616  | -1.26938 |
| H | 0.40042  | 3.08384  | -1.18683 |

---

**TSB<sub>4S</sub>**

|   |         |          |         |
|---|---------|----------|---------|
| N | 3.75711 | -0.38346 | 2.74056 |
| N | 2.48362 | 1.20983  | 0.82424 |
| N | 5.20367 | 2.16852  | 1.10989 |
| N | 5.53329 | 2.19812  | 3.77322 |
| C | 4.27265 | -1.14356 | 3.69637 |

|   |         |          |          |
|---|---------|----------|----------|
| C | 4.29754 | -2.56087 | 3.67282  |
| C | 3.71427 | -3.21114 | 2.61873  |
| H | 3.68425 | -4.29907 | 2.55976  |
| C | 3.07695 | -2.44768 | 1.61067  |
| C | 2.33733 | -3.06156 | 0.57708  |
| H | 2.31095 | -4.14834 | 0.52399  |
| C | 1.62128 | -2.29524 | -0.30963 |
| H | 1.01179 | -2.76415 | -1.07789 |
| C | 1.66181 | -0.89366 | -0.21924 |
| H | 1.05064 | -0.31293 | -0.90451 |
| C | 2.44397 | -0.24527 | 0.7218   |
| C | 3.13273 | -1.01902 | 1.6935   |
| C | 1.1133  | 1.73529  | 0.97594  |
| H | 1.17076 | 2.81221  | 1.16581  |
| H | 0.64277 | 1.25458  | 1.83785  |
| H | 0.48509 | 1.5572   | 0.0912   |
| C | 3.19753 | 1.91097  | -0.30844 |
| H | 2.99375 | 2.98171  | -0.11917 |
| C | 2.67543 | 1.5588   | -1.70338 |
| H | 2.82027 | 0.48427  | -1.87566 |
| H | 1.5923  | 1.74036  | -1.75334 |
| C | 3.40354 | 2.30218  | -2.8132  |
| H | 2.97412 | 2.02856  | -3.78435 |
| H | 3.26946 | 3.39081  | -2.69937 |
| C | 4.88595 | 1.97459  | -2.75273 |
| H | 5.43794 | 2.49217  | -3.54534 |
| H | 5.03605 | 0.8974   | -2.92101 |
| C | 5.4307  | 2.38945  | -1.39595 |
| H | 5.29286 | 3.47672  | -1.30753 |
| H | 6.51198 | 2.21802  | -1.32837 |
| C | 4.71616 | 1.70239  | -0.22263 |
| H | 4.90757 | 0.61739  | -0.25592 |
| C | 5.44282 | 3.63592  | 1.13929  |
| H | 6.36805 | 3.90647  | 0.61477  |
| H | 5.4979  | 3.97545  | 2.17505  |
| H | 4.60271 | 4.14871  | 0.66576  |
| C | 6.55789 | 1.6484   | 3.04001  |
| C | 6.3584  | 1.49167  | 1.64114  |
| C | 7.28065 | 0.77129  | 0.90945  |
| H | 7.13855 | 0.60895  | -0.15577 |
| C | 8.44345 | 0.26156  | 1.52451  |
| H | 9.15373 | -0.29917 | 0.92198  |
| C | 8.71255 | 0.51395  | 2.84914  |
| H | 9.64005 | 0.17114  | 3.30338  |
| C | 7.77771 | 1.22243  | 3.63944  |
| C | 7.97766 | 1.51961  | 5.01208  |
| H | 8.91057 | 1.22318  | 5.49214  |
| C | 6.98472 | 2.16298  | 5.70848  |
| C | 5.75803 | 2.44401  | 5.0539   |
| C | 4.8686  | -0.64654 | 4.97838  |
| H | 4.3181  | 0.21273  | 5.3846   |
| H | 5.9021  | -0.30955 | 4.80665  |
| C | 4.84361 | -1.88783 | 5.88163  |
| H | 5.63064 | -1.87661 | 6.64107  |
| H | 3.88304 | -1.93814 | 6.41106  |
| C | 4.95581 | -3.07838 | 4.91512  |
| H | 6.01002 | -3.31856 | 4.71097  |

|    |          |          |          |
|----|----------|----------|----------|
| H  | 4.4979   | -3.99541 | 5.30051  |
| C  | 4.76371  | 3.01214  | 6.02104  |
| H  | 3.76361  | 2.57791  | 5.89492  |
| H  | 4.65807  | 4.09561  | 5.84872  |
| C  | 5.39049  | 2.70811  | 7.39237  |
| H  | 5.01207  | 1.74366  | 7.75647  |
| H  | 5.1422   | 3.45614  | 8.15052  |
| C  | 6.90452  | 2.6013   | 7.13882  |
| H  | 7.39307  | 3.57993  | 7.25613  |
| H  | 7.41013  | 1.92056  | 7.83193  |
| Fe | 3.63568  | 1.81153  | 2.70818  |
| C  | 1.60014  | 3.09438  | 4.39116  |
| C  | 1.54826  | 1.04269  | 5.10526  |
| H  | 1.72957  | -0.02521 | 5.1041   |
| C  | 0.85799  | 1.79638  | 6.01425  |
| H  | 0.35173  | 1.54492  | 6.93588  |
| N  | 2.01811  | 1.8519   | 4.10483  |
| N  | 0.90421  | 3.09669  | 5.56036  |
| C  | 0.35908  | 4.27085  | 6.27252  |
| H  | -0.59091 | 4.54972  | 5.79862  |
| C  | 1.96227  | 4.20005  | 3.51593  |
| C  | 1.42587  | 5.44585  | 3.46816  |
| O  | 2.91447  | 3.85072  | 2.62288  |
| C  | 1.94472  | 6.43611  | 2.46432  |
| H  | 2.97331  | 6.7082   | 2.76033  |
| C  | 1.11178  | 7.70757  | 2.38525  |
| H  | 0.07453  | 7.48627  | 2.10529  |
| H  | 1.09264  | 8.22249  | 3.35219  |
| H  | 1.51994  | 8.40281  | 1.64412  |
| H  | 1.07187  | 5.08651  | 6.09693  |
| C  | 0.1794   | 4.0161   | 7.73793  |
| C  | 1.2967   | 3.97057  | 8.57823  |
| C  | -1.09182 | 3.81042  | 8.2762   |
| C  | 1.14459  | 3.7232   | 9.93689  |
| H  | 2.28968  | 4.1425   | 8.15922  |
| C  | -1.2457  | 3.56711  | 9.63909  |
| H  | -1.96674 | 3.84937  | 7.62719  |
| C  | -0.12891 | 3.52214  | 10.46864 |
| H  | 2.01659  | 3.69977  | 10.58682 |
| H  | -2.23991 | 3.41809  | 10.05373 |
| H  | -0.25005 | 3.33768  | 11.53369 |
| C  | 2.51752  | 5.88286  | -1.19543 |
| C  | 3.05919  | 6.21606  | 0.06003  |
| C  | 4.31753  | 6.81935  | 0.11268  |
| C  | 4.98791  | 7.06297  | -1.08065 |
| C  | 4.42995  | 6.70978  | -2.31959 |
| C  | 3.17846  | 6.1113   | -2.39952 |
| C  | 0.99326  | 5.30518  | 0.33494  |
| H  | 4.76291  | 7.10271  | 1.06577  |
| H  | 5.96048  | 7.54916  | -1.05814 |
| H  | 4.97881  | 6.92298  | -3.23343 |
| H  | 2.73552  | 5.85298  | -3.35969 |
| H  | 0.03612  | 4.94442  | 0.70077  |
| H  | 0.5971   | 5.73261  | 4.10731  |
| N  | 1.24938  | 5.32692  | -0.97798 |
| C  | 0.36788  | 4.87796  | -2.03914 |
| H  | 0.09216  | 5.72279  | -2.67793 |

|   |          |         |          |
|---|----------|---------|----------|
| H | 0.87114  | 4.12167 | -2.65139 |
| H | -0.53596 | 4.44833 | -1.60326 |
| C | 2.11306  | 5.75898 | 1.08594  |
| H | 2.61393  | 4.66936 | 1.60835  |

---

**TSB<sub>4R</sub>**


---

|   |          |          |          |
|---|----------|----------|----------|
| N | 4.15418  | -0.37635 | 3.0992   |
| N | 2.37674  | 0.47369  | 1.10678  |
| N | 5.03577  | 1.51389  | 0.667    |
| N | 5.56249  | 2.76898  | 2.98955  |
| C | 5.019    | -0.8246  | 4.00043  |
| C | 4.97602  | -2.11895 | 4.58344  |
| C | 3.93655  | -2.95135 | 4.26656  |
| H | 3.83253  | -3.93724 | 4.72001  |
| C | 2.95574  | -2.50655 | 3.34787  |
| C | 1.81477  | -3.28238 | 3.04844  |
| H | 1.70434  | -4.257   | 3.52016  |
| C | 0.85361  | -2.79895 | 2.19424  |
| H | -0.03768 | -3.38248 | 1.97822  |
| C | 1.03198  | -1.55276 | 1.57094  |
| H | 0.27125  | -1.20247 | 0.87787  |
| C | 2.15747  | -0.78218 | 1.7989   |
| C | 3.12322  | -1.22032 | 2.74245  |
| C | 1.1106   | 1.20593  | 0.89616  |
| H | 1.34511  | 2.23889  | 0.61923  |
| H | 0.53455  | 1.20888  | 1.82565  |
| H | 0.49386  | 0.76198  | 0.10146  |
| C | 3.05249  | 0.31399  | -0.2393  |
| H | 2.72043  | 1.19985  | -0.80276 |
| C | 2.60516  | -0.92252 | -1.01886 |
| H | 2.92633  | -1.82484 | -0.47807 |
| H | 1.50848  | -0.96085 | -1.05335 |
| C | 3.17732  | -0.94738 | -2.43052 |
| H | 2.86702  | -1.86776 | -2.93759 |
| H | 2.75554  | -0.11581 | -3.01541 |
| C | 4.6926   | -0.82441 | -2.40083 |
| H | 5.09994  | -0.78336 | -3.41718 |
| H | 5.13246  | -1.71508 | -1.92616 |
| C | 5.0966   | 0.42344  | -1.62853 |
| H | 4.65308  | 1.29884  | -2.12788 |
| H | 6.18005  | 0.57927  | -1.66408 |
| C | 4.58424  | 0.37554  | -0.18062 |
| H | 4.96034  | -0.529   | 0.32298  |
| C | 4.86338  | 2.82787  | 0.00172  |
| H | 5.53276  | 2.9389   | -0.86118 |
| H | 5.07695  | 3.61959  | 0.72546  |
| H | 3.82259  | 2.93905  | -0.32305 |
| C | 6.63906  | 2.22383  | 2.33895  |
| C | 6.37394  | 1.412    | 1.20171  |
| C | 7.38785  | 0.61795  | 0.7028   |
| H | 7.20691  | -0.07269 | -0.11479 |
| C | 8.69175  | 0.70123  | 1.2356   |
| H | 9.47035  | 0.07048  | 0.8136   |
| C | 8.99543  | 1.59662  | 2.23413  |
| H | 10.01452 | 1.69436  | 2.60358  |
| C | 7.9707   | 2.37489  | 2.82048  |
| C | 8.18541  | 3.25489  | 3.91287  |

|    |          |          |         |
|----|----------|----------|---------|
| H  | 9.19837  | 3.40313  | 4.28764 |
| C  | 7.10499  | 3.86663  | 4.49703 |
| C  | 5.80353  | 3.54515  | 4.0327  |
| C  | 6.1741   | -0.05539 | 4.56563 |
| H  | 5.91755  | 0.98719  | 4.78534 |
| H  | 6.99277  | -0.03294 | 3.82914 |
| C  | 6.57123  | -0.85853 | 5.81288 |
| H  | 7.63585  | -0.77612 | 6.04858 |
| H  | 6.01784  | -0.48107 | 6.68183 |
| C  | 6.13306  | -2.30077 | 5.51699 |
| H  | 6.93475  | -2.85908 | 5.01086 |
| H  | 5.88088  | -2.87135 | 6.4171  |
| C  | 4.76023  | 4.14839  | 4.91636 |
| H  | 3.9491   | 3.44177  | 5.1358  |
| H  | 4.29331  | 5.00448  | 4.40645 |
| C  | 5.55695  | 4.5892   | 6.15463 |
| H  | 5.54808  | 3.78497  | 6.90099 |
| H  | 5.13715  | 5.47755  | 6.63605 |
| C  | 6.99763  | 4.80696  | 5.65907 |
| H  | 7.13694  | 5.84158  | 5.30913 |
| H  | 7.75335  | 4.63674  | 6.43314 |
| Fe | 3.69086  | 1.73561  | 2.47028 |
| C  | 1.35014  | 2.92262  | 3.87271 |
| C  | 1.68127  | 1.08563  | 4.98716 |
| H  | 2.16125  | 0.15896  | 5.27657 |
| C  | 0.56643  | 1.67599  | 5.51567 |
| H  | -0.09159 | 1.3909   | 6.32412 |
| N  | 2.16552  | 1.86191  | 3.96937 |
| N  | 0.3614   | 2.83747  | 4.80494 |
| C  | -0.72751 | 3.81091  | 5.04054 |
| H  | -1.31462 | 3.87109  | 4.11523 |
| C  | 1.59484  | 3.91732  | 2.83804 |
| C  | 0.84971  | 5.00234  | 2.50986 |
| H  | -0.06171 | 5.25107  | 3.04178 |
| O  | 2.7301   | 3.65405  | 2.15442 |
| C  | 1.29086  | 5.90575  | 1.39162 |
| H  | 1.12901  | 5.37551  | 0.43442 |
| C  | 0.51744  | 7.2173   | 1.35426 |
| H  | -0.55789 | 7.03118  | 1.25773 |
| H  | 0.67599  | 7.799    | 2.26975 |
| H  | 0.82722  | 7.83788  | 0.50686 |
| H  | -0.25199 | 4.78828  | 5.19743 |
| C  | -1.59569 | 3.43331  | 6.20012 |
| C  | -1.25507 | 3.82448  | 7.49803 |
| C  | -2.7373  | 2.65418  | 5.99522 |
| C  | -2.04651 | 3.44186  | 8.57647 |
| H  | -0.36728 | 4.43609  | 7.6625  |
| C  | -3.52926 | 2.27165  | 7.07348 |
| H  | -3.00985 | 2.3521   | 4.98355 |
| C  | -3.18315 | 2.66431  | 8.36441 |
| H  | -1.78059 | 3.7565   | 9.58312 |
| H  | -4.42167 | 1.67315  | 6.90515 |
| H  | -3.80482 | 2.37069  | 9.20715 |
| C  | 4.646    | 7.42942  | 2.05419 |
| C  | 3.44406  | 6.9029   | 2.56094 |
| C  | 3.09901  | 7.17088  | 3.88778 |
| C  | 3.96746  | 7.93556  | 4.65978 |



|   |         |         |          |
|---|---------|---------|----------|
| C | 5.17965 | 8.41367 | 4.13991  |
| C | 5.54302 | 8.16675 | 2.82123  |
| C | 3.63226 | 6.39867 | 0.35035  |
| H | 2.16563 | 6.79513 | 4.30528  |
| H | 3.70118 | 8.17501 | 5.68688  |
| H | 5.83687 | 9.00608 | 4.77184  |
| H | 6.47215 | 8.55523 | 2.40951  |
| H | 3.49878 | 6.06535 | -0.67508 |
| N | 4.7183  | 7.0973  | 0.69443  |
| C | 5.82127 | 7.46285 | -0.17477 |
| H | 5.95415 | 8.54873 | -0.16514 |
| H | 6.74665 | 6.98709 | 0.16573  |
| H | 5.6015  | 7.1408  | -1.19387 |
| C | 2.81209 | 6.13191 | 1.48147  |
| H | 3.07335 | 4.8848  | 1.72762  |

---

|                          |          |          |          |
|--------------------------|----------|----------|----------|
| <b>IntB<sub>55</sub></b> |          |          |          |
| N                        | 0.35349  | -2.62628 | -0.1123  |
| N                        | -0.95034 | -0.87966 | -1.90269 |
| N                        | 1.84788  | -0.17441 | -1.71141 |
| N                        | 2.21234  | 0.08606  | 0.93314  |
| C                        | 0.95451  | -3.4572  | 0.72877  |
| C                        | 0.72571  | -4.85573 | 0.77742  |
| C                        | -0.21891 | -5.39635 | -0.05282 |
| H                        | -0.46055 | -6.45898 | -0.03211 |
| C                        | -0.93242 | -4.54463 | -0.93114 |
| C                        | -1.98804 | -5.02957 | -1.73253 |
| H                        | -2.23015 | -6.09002 | -1.69716 |
| C                        | -2.71351 | -4.16604 | -2.51648 |
| H                        | -3.54601 | -4.52827 | -3.11413 |
| C                        | -2.37486 | -2.80405 | -2.55848 |
| H                        | -2.96072 | -2.14484 | -3.19295 |
| C                        | -1.31434 | -2.29118 | -1.83179 |
| C                        | -0.59599 | -3.15254 | -0.96065 |
| C                        | -2.15338 | -0.02497 | -1.83236 |
| H                        | -1.84311 | 1.01923  | -1.72546 |
| H                        | -2.74751 | -0.31281 | -0.96068 |
| H                        | -2.78364 | -0.09529 | -2.73116 |
| C                        | -0.15167 | -0.50545 | -3.13674 |
| H                        | -0.27034 | 0.58946  | -3.20373 |
| C                        | -0.68553 | -1.10888 | -4.43664 |
| H                        | -0.61631 | -2.20448 | -4.38651 |
| H                        | -1.75279 | -0.87023 | -4.54394 |
| C                        | 0.08626  | -0.62749 | -5.65781 |
| H                        | -0.32468 | -1.0928  | -6.56097 |
| H                        | -0.04368 | 0.46041  | -5.77844 |
| C                        | 1.5655   | -0.93577 | -5.50053 |
| H                        | 2.13511  | -0.57265 | -6.36316 |
| H                        | 1.71901  | -2.0252  | -5.46369 |
| C                        | 2.08315  | -0.28327 | -4.22842 |
| H                        | 1.91773  | 0.80235  | -4.31195 |
| H                        | 3.16579  | -0.41519 | -4.12307 |
| C                        | 1.34791  | -0.78861 | -2.97783 |
| H                        | 1.49229  | -1.87521 | -2.86092 |
| C                        | 2.04353  | 1.29497  | -1.83939 |
| H                        | 2.93247  | 1.53741  | -2.43405 |
| H                        | 2.15107  | 1.73347  | -0.84408 |

|    |          |          |          |
|----|----------|----------|----------|
| H  | 1.17048  | 1.74096  | -2.32679 |
| C  | 3.25502  | -0.46693 | 0.23107  |
| C  | 3.03644  | -0.76368 | -1.14184 |
| C  | 3.96204  | -1.53828 | -1.81127 |
| H  | 3.80026  | -1.83094 | -2.84449 |
| C  | 5.15429  | -1.94125 | -1.17277 |
| H  | 5.86892  | -2.54215 | -1.72965 |
| C  | 5.44505  | -1.53766 | 0.10931  |
| H  | 6.39313  | -1.8005  | 0.57445  |
| C  | 4.4979   | -0.79037 | 0.84674  |
| C  | 4.69419  | -0.38318 | 2.18991  |
| H  | 5.64409  | -0.59783 | 2.67982  |
| C  | 3.67492  | 0.25679  | 2.8508   |
| C  | 2.43029  | 0.42937  | 2.1938   |
| C  | 1.94014  | -3.06679 | 1.78708  |
| H  | 1.67006  | -2.12661 | 2.28543  |
| H  | 2.93058  | -2.91248 | 1.33109  |
| C  | 1.95098  | -4.28099 | 2.72751  |
| H  | 2.9057   | -4.4088  | 3.24492  |
| H  | 1.17962  | -4.15313 | 3.49807  |
| C  | 1.58679  | -5.47715 | 1.83408  |
| H  | 2.48726  | -5.91267 | 1.37583  |
| H  | 1.09187  | -6.28948 | 2.37634  |
| C  | 1.41815  | 1.01913  | 3.12919  |
| H  | 0.44534  | 0.51701  | 3.05878  |
| H  | 1.24459  | 2.07489  | 2.86619  |
| C  | 2.07736  | 0.86764  | 4.51103  |
| H  | 1.74386  | -0.07223 | 4.96936  |
| H  | 1.80868  | 1.67328  | 5.20001  |
| C  | 3.5911   | 0.79922  | 4.24436  |
| H  | 4.04354  | 1.80122  | 4.27929  |
| H  | 4.13061  | 0.19353  | 4.98019  |
| Fe | 0.34222  | -0.43555 | -0.0913  |
| C  | -1.78548 | 0.83674  | 1.6137   |
| C  | -1.70733 | -1.25183 | 2.21489  |
| H  | -1.43398 | -2.2989  | 2.17     |
| C  | -2.50583 | -0.60701 | 3.11752  |
| H  | -3.03542 | -0.94532 | 3.99724  |
| N  | -1.25366 | -0.35181 | 1.28575  |
| N  | -2.542   | 0.71642  | 2.73618  |
| C  | -3.21803 | 1.79731  | 3.48471  |
| H  | -4.19982 | 1.97136  | 3.02631  |
| C  | -1.51814 | 2.02583  | 0.82877  |
| C  | -2.28415 | 3.12595  | 0.70903  |
| O  | -0.33765 | 1.85129  | 0.11884  |
| C  | -1.95435 | 4.31764  | -0.16038 |
| H  | -1.00933 | 4.74797  | 0.21509  |
| C  | -3.03277 | 5.39225  | -0.04276 |
| H  | -4.00006 | 5.01917  | -0.40057 |
| H  | -3.16052 | 5.71405  | 0.99707  |
| H  | -2.77464 | 6.27042  | -0.64088 |
| H  | -2.61218 | 2.69777  | 3.32294  |
| C  | -3.35858 | 1.48189  | 4.94281  |
| C  | -2.22758 | 1.43679  | 5.76555  |
| C  | -4.61765 | 1.23934  | 5.49342  |
| C  | -2.3573  | 1.15607  | 7.12     |
| H  | -1.2424  | 1.63238  | 5.33789  |

|   |          |         |          |
|---|----------|---------|----------|
| C | -4.74864 | 0.96417 | 6.85268  |
| H | -5.50223 | 1.27679 | 4.85769  |
| C | -3.61977 | 0.9222  | 7.66535  |
| H | -1.47607 | 1.13227 | 7.75722  |
| H | -5.73424 | 0.78761 | 7.27679  |
| H | -3.72181 | 0.71242 | 8.72769  |
| C | -0.68781 | 3.43502 | -3.59953 |
| C | -0.45714 | 3.97257 | -2.30234 |
| C | 0.82486  | 4.45924 | -1.98674 |
| C | 1.82171  | 4.39257 | -2.94778 |
| C | 1.57388  | 3.84217 | -4.21975 |
| C | 0.31932  | 3.35717 | -4.56542 |
| C | -2.61681 | 3.36688 | -2.47143 |
| H | 1.02656  | 4.90745 | -1.0134  |
| H | 2.81064  | 4.7871  | -2.72461 |
| H | 2.37476  | 3.81868 | -4.9558  |
| H | 0.12196  | 2.97202 | -5.56526 |
| H | -3.67478 | 3.16331 | -2.33915 |
| H | -3.23074 | 3.14347 | 1.24477  |
| N | -2.01494 | 3.07536 | -3.67369 |
| C | -2.6707  | 2.56124 | -4.85406 |
| H | -2.65947 | 3.29895 | -5.66408 |
| H | -2.17193 | 1.64909 | -5.20705 |
| H | -3.70916 | 2.3221  | -4.61499 |
| C | -1.70484 | 3.90738 | -1.59194 |
| H | -0.32697 | 2.47363 | -0.64142 |

---

|                          |          |          |          |
|--------------------------|----------|----------|----------|
| <b>IntB<sub>5R</sub></b> |          |          |          |
| N                        | 0.70527  | -2.7144  | 0.1419   |
| N                        | -1.10512 | -1.93389 | -1.85353 |
| N                        | 1.50908  | -0.78099 | -2.33695 |
| N                        | 1.95481  | 0.558    | -0.05053 |
| C                        | 1.59672  | -3.12442 | 1.03364  |
| C                        | 1.61237  | -4.41762 | 1.61705  |
| C                        | 0.60387  | -5.29136 | 1.30974  |
| H                        | 0.54147  | -6.27901 | 1.76669  |
| C                        | -0.40249 | -4.88833 | 0.39735  |
| C                        | -1.5162  | -5.7061  | 0.10697  |
| H                        | -1.58678 | -6.68456 | 0.57824  |
| C                        | -2.50303 | -5.25733 | -0.73711 |
| H                        | -3.37411 | -5.87345 | -0.94445 |
| C                        | -2.37849 | -4.00655 | -1.3645  |
| H                        | -3.15816 | -3.68838 | -2.05174 |
| C                        | -1.28015 | -3.19447 | -1.14924 |
| C                        | -0.29283 | -3.5976  | -0.21195 |
| C                        | -2.40214 | -1.26044 | -2.08296 |
| H                        | -2.21157 | -0.22381 | -2.37537 |
| H                        | -2.98647 | -1.26899 | -1.15885 |
| H                        | -2.98972 | -1.74341 | -2.87607 |
| C                        | -0.42131 | -2.09051 | -3.20188 |
| H                        | -0.79158 | -1.23019 | -3.78064 |
| C                        | -0.82091 | -3.35999 | -3.95348 |
| H                        | -0.46266 | -4.23719 | -3.39498 |
| H                        | -1.91517 | -3.44273 | -3.98557 |
| C                        | -0.24993 | -3.39394 | -5.36536 |
| H                        | -0.52692 | -4.33637 | -5.85062 |
| H                        | -0.70245 | -2.59197 | -5.96801 |

|    |          |          |          |
|----|----------|----------|----------|
| C  | 1.2596   | -3.21589 | -5.33905 |
| H  | 1.66595  | -3.18343 | -6.35598 |
| H  | 1.73148  | -4.07843 | -4.84377 |
| C  | 1.61698  | -1.93618 | -4.59715 |
| H  | 1.14334  | -1.08948 | -5.11732 |
| H  | 2.69411  | -1.74207 | -4.63645 |
| C  | 1.10653  | -1.96461 | -3.14801 |
| H  | 1.52032  | -2.83677 | -2.61728 |
| C  | 1.30231  | 0.5007   | -3.0503  |
| H  | 1.99473  | 0.61896  | -3.89427 |
| H  | 1.46118  | 1.32445  | -2.34821 |
| H  | 0.27212  | 0.5533   | -3.41896 |
| C  | 3.06291  | 0.02997  | -0.6686  |
| C  | 2.84678  | -0.81479 | -1.7915  |
| C  | 3.89996  | -1.57334 | -2.26412 |
| H  | 3.75747  | -2.28435 | -3.07188 |
| C  | 5.19163  | -1.42783 | -1.71581 |
| H  | 6.00224  | -2.03041 | -2.11809 |
| C  | 5.44229  | -0.50906 | -0.72354 |
| H  | 6.44992  | -0.36637 | -0.33796 |
| C  | 4.37784  | 0.23476  | -0.16432 |
| C  | 4.53914  | 1.12701  | 0.9265   |
| H  | 5.53883  | 1.31096  | 1.3206   |
| C  | 3.42907  | 1.70447  | 1.48949  |
| C  | 2.14685  | 1.3508   | 0.99399  |
| C  | 2.72217  | -2.30266 | 1.58283  |
| H  | 2.42456  | -1.26717 | 1.793    |
| H  | 3.53494  | -2.25532 | 0.84043  |
| C  | 3.1585   | -3.08159 | 2.83254  |
| H  | 4.21951  | -2.9524  | 3.06304  |
| H  | 2.59296  | -2.72446 | 3.70201  |
| C  | 2.78189  | -4.54375 | 2.5444   |
| H  | 3.60432  | -5.06866 | 2.03598  |
| H  | 2.56031  | -5.12034 | 3.44859  |
| C  | 1.07118  | 1.95868  | 1.83428  |
| H  | 0.25264  | 1.25622  | 2.03758  |
| H  | 0.62861  | 2.81583  | 1.30141  |
| C  | 1.82044  | 2.41976  | 3.09476  |
| H  | 1.78557  | 1.62891  | 3.85448  |
| H  | 1.37812  | 3.3174   | 3.53705  |
| C  | 3.27579  | 2.64073  | 2.6475   |
| H  | 3.41587  | 3.67568  | 2.30037  |
| H  | 4.00706  | 2.47234  | 3.44505  |
| Fe | 0.201    | -0.6705  | -0.49895 |
| C  | -2.14815 | 0.60459  | 0.90889  |
| C  | -1.87    | -1.30938 | 1.90375  |
| H  | -1.42767 | -2.27465 | 2.11703  |
| C  | -2.93756 | -0.70069 | 2.50278  |
| H  | -3.58557 | -1.00257 | 3.31318  |
| N  | -1.37954 | -0.49794 | 0.91647  |
| N  | -3.10919 | 0.50886  | 1.86813  |
| C  | -4.1524  | 1.50916  | 2.19644  |
| H  | -4.70333 | 1.71122  | 1.26892  |
| C  | -1.91237 | 1.66525  | -0.04987 |
| C  | -2.49071 | 2.87517  | -0.18256 |
| H  | -3.2463  | 3.18621  | 0.532    |
| O  | -0.92186 | 1.26388  | -0.93939 |

|   |          |          |          |
|---|----------|----------|----------|
| C | -2.13315 | 3.84097  | -1.29054 |
| H | -2.36444 | 3.33536  | -2.24565 |
| C | -2.97958 | 5.11027  | -1.21916 |
| H | -4.04868 | 4.87171  | -1.24446 |
| H | -2.78011 | 5.6745   | -0.30099 |
| H | -2.75893 | 5.76973  | -2.06313 |
| H | -3.63179 | 2.43062  | 2.48653  |
| C | -5.06841 | 1.0525   | 3.28788  |
| C | -4.77031 | 1.34724  | 4.62133  |
| C | -6.21522 | 0.31206  | 2.98654  |
| C | -5.60915 | 0.90966  | 5.64104  |
| H | -3.88089 | 1.93133  | 4.85991  |
| C | -7.05394 | -0.12552 | 4.00638  |
| H | -6.45646 | 0.08677  | 1.94732  |
| C | -6.75092 | 0.17267  | 5.33356  |
| H | -5.37725 | 1.15152  | 6.67559  |
| H | -7.95035 | -0.69209 | 3.76506  |
| H | -7.41124 | -0.16328 | 6.12988  |
| C | 1.46171  | 4.82421  | -0.74366 |
| C | 0.12565  | 4.75423  | -0.27046 |
| C | -0.16562 | 5.25447  | 1.00964  |
| C | 0.85885  | 5.80426  | 1.76408  |
| C | 2.17659  | 5.86063  | 1.27184  |
| C | 2.49995  | 5.36528  | 0.01686  |
| C | 0.2231   | 3.87688  | -2.34242 |
| H | -1.18088 | 5.21818  | 1.40382  |
| H | 0.6423   | 6.21565  | 2.74757  |
| H | 2.95367  | 6.31666  | 1.88202  |
| H | 3.51823  | 5.42006  | -0.3648  |
| H | 0.02198  | 3.48003  | -3.33378 |
| N | 1.49625  | 4.2814   | -2.01075 |
| C | 2.67711  | 4.16015  | -2.83252 |
| H | 3.17347  | 5.1304   | -2.93969 |
| H | 3.39087  | 3.44667  | -2.39662 |
| H | 2.39067  | 3.81053  | -3.8273  |
| C | -0.65423 | 4.13962  | -1.30802 |
| H | -0.46329 | 2.0769   | -1.27187 |

---

**IntB<sub>6s</sub>**

|   |          |          |          |
|---|----------|----------|----------|
| N | 0.8037   | -2.5825  | 0.34085  |
| N | -0.85863 | -1.022   | -1.32743 |
| N | 1.89751  | -0.24857 | -1.8053  |
| N | 2.90732  | 0.05326  | 0.65372  |
| C | 1.55145  | -3.31525 | 1.15615  |
| C | 1.44484  | -4.72186 | 1.29012  |
| C | 0.46784  | -5.37544 | 0.58699  |
| H | 0.32055  | -6.45174 | 0.6771   |
| C | -0.41043 | -4.6272  | -0.2342  |
| C | -1.51738 | -5.22931 | -0.86969 |
| H | -1.66187 | -6.30314 | -0.76758 |
| C | -2.416   | -4.45862 | -1.56615 |
| H | -3.29164 | -4.91047 | -2.02535 |
| C | -2.20302 | -3.07635 | -1.6967  |
| H | -2.9301  | -2.48788 | -2.24988 |
| C | -1.09062 | -2.45133 | -1.15835 |
| C | -0.19583 | -3.21668 | -0.36269 |
| C | -2.07912 | -0.25227 | -0.99745 |

|    |          |          |          |
|----|----------|----------|----------|
| H  | -1.82264 | 0.81104  | -0.91822 |
| H  | -2.47865 | -0.60842 | -0.04237 |
| H  | -2.86436 | -0.35116 | -1.76183 |
| C  | -0.38724 | -0.62211 | -2.7186  |
| H  | -0.55603 | 0.46761  | -2.74649 |
| C  | -1.18251 | -1.25903 | -3.8636  |
| H  | -1.09271 | -2.35191 | -3.7956  |
| H  | -2.24832 | -1.01798 | -3.75048 |
| C  | -0.70239 | -0.831   | -5.24476 |
| H  | -1.29141 | -1.35216 | -6.00824 |
| H  | -0.88535 | 0.24365  | -5.38423 |
| C  | 0.78107  | -1.11048 | -5.40536 |
| H  | 1.13947  | -0.77334 | -6.38442 |
| H  | 0.97458  | -2.19365 | -5.35863 |
| C  | 1.53617  | -0.39019 | -4.3013  |
| H  | 1.30679  | 0.68308  | -4.37945 |
| H  | 2.62123  | -0.47833 | -4.42796 |
| C  | 1.11104  | -0.87779 | -2.91021 |
| H  | 1.29148  | -1.96204 | -2.82111 |
| C  | 2.08925  | 1.21566  | -2.01146 |
| H  | 2.78636  | 1.41245  | -2.83372 |
| H  | 2.47652  | 1.65902  | -1.09278 |
| H  | 1.12082  | 1.678    | -2.2249  |
| C  | 3.72994  | -0.5614  | -0.25616 |
| C  | 3.17728  | -0.86641 | -1.52829 |
| C  | 3.89689  | -1.67034 | -2.39031 |
| H  | 3.4892   | -1.96657 | -3.35234 |
| C  | 5.1972   | -2.10018 | -2.049   |
| H  | 5.74366  | -2.72194 | -2.75378 |
| C  | 5.79417  | -1.70297 | -0.87565 |
| H  | 6.81783  | -1.99222 | -0.64662 |
| C  | 5.07177  | -0.92148 | 0.05489  |
| C  | 5.59551  | -0.50226 | 1.30517  |
| H  | 6.62507  | -0.75106 | 1.56265  |
| C  | 4.78761  | 0.19616  | 2.1676   |
| C  | 3.43404  | 0.4192   | 1.80906  |
| C  | 2.58767  | -2.78812 | 2.10353  |
| H  | 2.27104  | -1.85506 | 2.58774  |
| H  | 3.51731  | -2.5596  | 1.55867  |
| C  | 2.79253  | -3.95169 | 3.08506  |
| H  | 3.79899  | -3.97346 | 3.51192  |
| H  | 2.08864  | -3.85241 | 3.92104  |
| C  | 2.45392  | -5.21681 | 2.28092  |
| H  | 3.34166  | -5.597   | 1.75406  |
| H  | 2.08628  | -6.04015 | 2.90215  |
| C  | 2.69732  | 1.09508  | 2.92422  |
| H  | 1.69077  | 0.68309  | 3.07774  |
| H  | 2.56422  | 2.15962  | 2.67321  |
| C  | 3.63461  | 0.90831  | 4.12882  |
| H  | 3.37     | -0.01807 | 4.6553   |
| H  | 3.56205  | 1.72115  | 4.85621  |
| C  | 5.04565  | 0.76814  | 3.52863  |
| H  | 5.53083  | 1.75064  | 3.43213  |
| H  | 5.71438  | 0.15411  | 4.14092  |
| Fe | 0.82126  | -0.43226 | 0.13257  |
| C  | -1.10835 | 0.93436  | 1.95249  |
| C  | -1.27606 | -1.13727 | 2.58488  |

|   |          |          |          |
|---|----------|----------|----------|
| H | -1.04039 | -2.19254 | 2.65205  |
| C | -2.27916 | -0.43712 | 3.2163   |
| H | -3.07144 | -0.74993 | 3.88423  |
| N | -0.56513 | -0.28946 | 1.80321  |
| N | -2.1689  | 0.86384  | 2.81665  |
| C | -3.15127 | 1.89767  | 3.21129  |
| H | -3.01004 | 2.73805  | 2.5293   |
| C | -0.48896 | 2.02196  | 1.19989  |
| C | -0.69336 | 3.48881  | 1.41713  |
| O | 0.34132  | 1.65329  | 0.34226  |
| C | -0.85438 | 4.22566  | 0.07712  |
| H | 0.09443  | 4.09393  | -0.46346 |
| C | -1.08448 | 5.71618  | 0.30152  |
| H | -2.01185 | 5.89335  | 0.86069  |
| H | -0.25987 | 6.17401  | 0.86045  |
| H | -1.17557 | 6.24109  | -0.65478 |
| H | -2.89988 | 2.2414   | 4.22147  |
| C | -4.55746 | 1.37995  | 3.13296  |
| C | -5.3759  | 1.36896  | 4.26214  |
| C | -5.05763 | 0.91214  | 1.91196  |
| C | -6.68548 | 0.9009   | 4.17276  |
| H | -4.99183 | 1.7349   | 5.21405  |
| C | -6.36141 | 0.43991  | 1.82566  |
| H | -4.41359 | 0.92012  | 1.02821  |
| C | -7.17754 | 0.43483  | 2.95755  |
| H | -7.31976 | 0.89964  | 5.0558   |
| H | -6.7477  | 0.07627  | 0.87524  |
| H | -8.19889 | 0.06768  | 2.88919  |
| C | -3.07164 | 2.68911  | -2.53438 |
| C | -1.82223 | 3.23521  | -2.13756 |
| C | -0.79795 | 3.35055  | -3.09221 |
| C | -1.03919 | 2.92313  | -4.38955 |
| C | -2.2867  | 2.38145  | -4.75674 |
| C | -3.31666 | 2.24883  | -3.83652 |
| C | -3.21199 | 3.2476   | -0.37495 |
| H | 0.15693  | 3.80716  | -2.82952 |
| H | -0.26631 | 3.03633  | -5.14803 |
| H | -2.4539  | 2.08001  | -5.78885 |
| H | -4.28532 | 1.84842  | -4.13192 |
| H | -3.73905 | 3.41152  | 0.56155  |
| H | -1.53723 | 3.70313  | 2.0801   |
| N | -3.90385 | 2.70353  | -1.43863 |
| C | -5.28838 | 2.29483  | -1.4428  |
| H | -5.84461 | 2.82395  | -2.22424 |
| H | -5.38131 | 1.21392  | -1.61895 |
| H | -5.73901 | 2.53177  | -0.47583 |
| C | -1.93044 | 3.58543  | -0.75413 |
| H | 0.19603  | 3.86858  | 1.94514  |

---

**IntB<sub>6R</sub>**

|   |          |          |          |
|---|----------|----------|----------|
| N | 0.81714  | -2.57722 | 0.27302  |
| N | -0.67599 | -1.53236 | -1.88035 |
| N | 1.93125  | -0.27479 | -1.93482 |
| N | 2.35178  | 0.41024  | 0.62656  |
| C | 1.48189  | -3.07262 | 1.30878  |
| C | 1.61393  | -4.45535 | 1.58695  |
| C | 0.97138  | -5.35169 | 0.77519  |

|   |          |          |          |
|---|----------|----------|----------|
| H | 1.01469  | -6.42518 | 0.95986  |
| C | 0.1911   | -4.87044 | -0.3038  |
| C | -0.58213 | -5.74271 | -1.09898 |
| H | -0.5381  | -6.81204 | -0.90105 |
| C | -1.40485 | -5.23866 | -2.07651 |
| H | -2.03202 | -5.9013  | -2.66714 |
| C | -1.44121 | -3.85548 | -2.31948 |
| H | -2.11773 | -3.48013 | -3.08218 |
| C | -0.6444  | -2.96623 | -1.61765 |
| C | 0.15421  | -3.46006 | -0.55075 |
| C | -2.06344 | -1.0288  | -1.82345 |
| H | -2.04457 | 0.06704  | -1.83563 |
| H | -2.53247 | -1.37887 | -0.89942 |
| H | -2.67665 | -1.37097 | -2.67031 |
| C | -0.03521 | -1.10484 | -3.18822 |
| H | -0.35955 | -0.05672 | -3.3053  |
| C | -0.50584 | -1.88991 | -4.41502 |
| H | -0.24381 | -2.94927 | -4.28779 |
| H | -1.60105 | -1.84143 | -4.49023 |
| C | 0.13501  | -1.40412 | -5.70797 |
| H | -0.24562 | -1.99304 | -6.55049 |
| H | -0.14707 | -0.35626 | -5.89804 |
| C | 1.64687  | -1.49287 | -5.60268 |
| H | 2.12662  | -1.13965 | -6.52226 |
| H | 1.95517  | -2.54179 | -5.47302 |
| C | 2.10374  | -0.64608 | -4.42686 |
| H | 1.77909  | 0.38766  | -4.6162  |
| H | 3.19702  | -0.61156 | -4.35471 |
| C | 1.49438  | -1.11088 | -3.09611 |
| H | 1.82302  | -2.1391  | -2.87041 |
| C | 1.94882  | 1.18116  | -2.26984 |
| H | 2.79014  | 1.42342  | -2.92884 |
| H | 2.02608  | 1.76147  | -1.34934 |
| H | 1.00969  | 1.4584   | -2.7563  |
| C | 3.42345  | -0.13978 | -0.0332  |
| C | 3.198    | -0.64287 | -1.34201 |
| C | 4.19163  | -1.37983 | -1.95573 |
| H | 4.03697  | -1.81069 | -2.9407  |
| C | 5.44207  | -1.55939 | -1.32805 |
| H | 6.20817  | -2.13573 | -1.84059 |
| C | 5.71646  | -0.9743  | -0.11432 |
| H | 6.70058  | -1.07067 | 0.33991  |
| C | 4.71159  | -0.24723 | 0.56388  |
| C | 4.90568  | 0.35774  | 1.83276  |
| H | 5.88581  | 0.30104  | 2.30667  |
| C | 3.84893  | 0.9892   | 2.43945  |
| C | 2.57819  | 0.9582   | 1.80828  |
| C | 2.1694   | -2.26941 | 2.37088  |
| H | 1.59382  | -1.38102 | 2.66155  |
| H | 3.13841  | -1.90628 | 1.99424  |
| C | 2.36342  | -3.28111 | 3.50995  |
| H | 3.23809  | -3.06006 | 4.12763  |
| H | 1.48776  | -3.26133 | 4.17119  |
| C | 2.44768  | -4.65039 | 2.8158   |
| H | 3.48464  | -4.88349 | 2.53196  |
| H | 2.10664  | -5.47759 | 3.44698  |
| C | 1.54593  | 1.60639  | 2.68044  |



|    |          |          |          |
|----|----------|----------|----------|
| H  | 0.58964  | 1.06655  | 2.68163  |
| H  | 1.33583  | 2.61783  | 2.29646  |
| C  | 2.23309  | 1.66124  | 4.05437  |
| H  | 2.00391  | 0.74386  | 4.61258  |
| H  | 1.89765  | 2.5025   | 4.66682  |
| C  | 3.74025  | 1.70817  | 3.74938  |
| H  | 4.08543  | 2.74629  | 3.63361  |
| H  | 4.35439  | 1.26711  | 4.54165  |
| Fe | 0.51665  | -0.50106 | -0.22669 |
| C  | -1.78704 | 0.82558  | 1.1384   |
| C  | -1.76208 | -1.09968 | 2.13232  |
| H  | -1.44325 | -2.10616 | 2.37536  |
| C  | -2.80987 | -0.37848 | 2.66771  |
| H  | -3.54257 | -0.62276 | 3.4252   |
| N  | -1.13606 | -0.35332 | 1.19205  |
| N  | -2.81984 | 0.8311   | 2.03807  |
| C  | -3.78536 | 1.92973  | 2.31668  |
| H  | -4.13356 | 2.29559  | 1.34342  |
| C  | -1.28174 | 1.82953  | 0.21766  |
| C  | -1.82332 | 3.2065   | 0.06546  |
| H  | -2.25788 | 3.5773   | 1.00043  |
| O  | -0.32269 | 1.45955  | -0.49382 |
| C  | -2.88335 | 3.33957  | -1.0681  |
| H  | -3.7604  | 2.73564  | -0.77545 |
| C  | -3.31936 | 4.80299  | -1.1435  |
| H  | -3.69898 | 5.16215  | -0.17906 |
| H  | -2.48102 | 5.44552  | -1.43775 |
| H  | -4.10925 | 4.93082  | -1.88953 |
| H  | -3.22396 | 2.73764  | 2.80125  |
| C  | -4.93026 | 1.48747  | 3.1725   |
| C  | -4.90707 | 1.71654  | 4.55068  |
| C  | -6.02194 | 0.82487  | 2.60213  |
| C  | -5.96458 | 1.2915   | 5.34958  |
| H  | -4.06284 | 2.24136  | 4.99876  |
| C  | -7.07675 | 0.3983   | 3.40113  |
| H  | -6.04847 | 0.65203  | 1.52548  |
| C  | -7.04819 | 0.63153  | 4.77517  |
| H  | -5.94637 | 1.48392  | 6.41974  |
| H  | -7.92816 | -0.10675 | 2.95077  |
| H  | -7.87838 | 0.30656  | 5.39803  |
| C  | -1.24552 | 2.42172  | -4.33089 |
| C  | -1.19757 | 3.13505  | -3.10149 |
| C  | -0.09103 | 3.96433  | -2.85495 |
| C  | 0.91646  | 4.05514  | -3.80345 |
| C  | 0.85172  | 3.3286   | -5.00584 |
| C  | -0.23108 | 2.50621  | -5.28817 |
| C  | -3.12135 | 1.97742  | -3.20637 |
| H  | -0.02634 | 4.55763  | -1.94365 |
| H  | 1.76473  | 4.71247  | -3.62469 |
| H  | 1.64712  | 3.43537  | -5.74031 |
| H  | -0.30428 | 1.98322  | -6.24134 |
| H  | -4.10262 | 1.53786  | -3.05526 |
| N  | -2.42944 | 1.71138  | -4.36626 |
| C  | -2.96627 | 1.04095  | -5.52764 |
| H  | -3.28149 | 1.7577   | -6.29543 |
| H  | -2.21664 | 0.37183  | -5.96512 |
| H  | -3.83193 | 0.44263  | -5.2315  |

|   |          |         |          |
|---|----------|---------|----------|
| C | -2.40631 | 2.8191  | -2.38876 |
| H | -0.97522 | 3.85693 | -0.17713 |

---
